# Supplementary material for: Host Phylogeny Is a Major Determinant of Fagaceae-Associated Ectomycorrhizal Fungal Community Assembly at a Regional Scale
Source: Front Microbiol. 2018 Oct 10;9:2409. doi: 10.3389/fmicb.2018.02409 (PMC6191505; doi:10.3389/fmicb.2018.02409)
Supplement: Supplementary file 2 [file Table_1.XLSX]

## Sheet: Sheet1
Supplementary Table 1. Locations, host plant species, climate and soil properties of sites sampled in this study.
Site (abbreviation)	Species	Latitude (°)	Longitude (°)	Altitude (m, above sea level)	C (mg.kg-1)	MAT (℃)	MAP (mm)	Total soil C (mg.kg-1)	Total soil N (mg.kg-1)	Total soil P (mg.kg-1)	Total soil Ca (mg.kg-1)	C:N ratio	C:P ratio	N:P ratio	pH	PSD
Xishuangbanna (XS)	Castanopsis echidnocarpa	21.6117	101.574	896	2.28546	21.8	1493	2.28546	0.186763	0.252757	0.278343	12.2373	9.04216	0.738904	4.52	2.60851
	Castanopsis hystrix
Dinghushan (DH)	Castanopsis chinensis	23.16	112.54	38	5.99423	20.9	1929	5.99423	0.306632	0.314332	0.185468	19.5486	19.0698	0.975505	3.54	2.62244
	Castanopsis fissa
	Castanopsis eyrei	23.16	112.54	847	5.4287	20.9	1929	5.4287	0.273109	0.211505	0.0961764	19.8774	25.667	1.29126	3.46	2.61895
Heishiding (HS)	Castanopsis carlesii	23.4627	111.9	292	3.05545	19.6	1743.8	3.05545	0.230517	0.0781448	0.158714	13.2548	39.0999	2.94986	4.12	2.55378
	Castanopsis faberi Hance
	Castanopsis nigrescens
	Castanopsis sp.2
	Cyclobalanopsis chungii
	Cyclobalanopsis hui
	Lithocarpus sp.2
Ailaoshan (AL)	Castanopsis fleuryi	24.5439	101.028	2500	14.8138	10.7	1841	14.8138	1.03567	0.806393	0.579233	14.3036	18.3705	1.28433	3.61	2.55993
	Castanopsis rufescens
	Castanopsis sp.1
	Cyclobalanopsis stewardiana
	Lithocarpus hancei
	Lithocarpus pachyphyllus
	Quercus griffithii
	Quercus variabilis
Kunming (KM)	Castanopsis delavayi	24.9307	102.62	2213	6.145	14.8	1035	6.145	0.435796	0.8331	1.1675	14.1006	7.37606	0.523102	5.87	2.30804
	Castanopsis orthacantha
	Cyclobalanopsis glauca
	Cyclobalanopsis glaucoides
	Cyclobalanopsis sp.
	Lithocarpus dealbatus
	Lithocarpus sp.1
	Quercus acutissima
	Quercus aliena
	Quercus franchetii
	Quercus longispica
	Quercus variabilis
Guilin (GL)	Cyclobalanopsis fleuryi	25.079	110.299	186	4.07746	19.1	1926	4.07746	0.253807	0.577695	0.642357	16.0652	7.05815	0.439344	4.19	2.58337
	Cyclobalanopsis glauca
	Quercus griffithii
	Castanopsis carlesii	25.8835	110.47	777	4.899	19.1	1926	4.899	0.334289	0.290069	0.160547	14.655	16.8891	1.15245	4.27	2.5822
	Castanopsis eyrei
	Castanopsis faberi
	Castanopsis tibetana
Jinggangshan (JG)	Castanea henryi	26.52	114.198	283	3.39526	14.2	1856.3	3.39526	0.205573	0.422274	0.196692	16.5161	8.04043	0.486825	4.57	2.67169
	Castanopsis fargesii
	Castanea mollissima	26.5561	114.121	925	3.1097	14.2	1856.3	3.1097	0.227154	0.501731	1.08973	13.6898	6.19794	0.452742	4.69	2.66057
	Castanopsis sclerophylla
	Castanopsis eyrei	26.5181	114.117	881	4.58087	14.2	1856.3	4.58087	0.313187	0.781926	0.981473	14.6266	5.85845	0.400533	4.33	2.56173
	Castanopsis tibetana
	Cyclobalanopsis glauca
	Cyclobalanopsis myrsinifolia
Kaiyang (KY)	Quercus acutissima	26.9544	106.909	1046	4.33002	15.5	1100	4.33002	0.229347	0.228985	0.863246	18.8798	18.9097	1.00158	4.45	2.66061
	Quercus fabri
	Castanea seguinii	26.9222	106.941	1307	2.42336	15.5	1100	2.42336	0.158075	0.577739	0.283654	15.3304	4.19456	0.27361	4.07	2.67829
	Quercus serrata
Wuyanling (WY)	Castanopsis eyrei	27.7014	119.675	1036	4.30718	15.2	2195.8	4.30718	0.230302	0.170285	0.193053	18.7023	25.2939	1.35245	4.39	2.6389
	Castanopsis faberi
	Cyclobalanopsis myrsinifolia
	Cyclobalanopsis sessilifolia
	Cyclobalanopsis stewardiana
	Fagus engleriana
	Lithocarpus brevicaudatus
	Quercus engleriana
	Quercus fabri
Wuyishan (WS)	Castanea henryi	27.7342	117.639	1193	0.826611	12.8	2096.6	0.826611	0.0457233	0.292357	0.427552	18.0786	2.82741	0.156396	4.91	2.57993
	Castanopsis tibetana
	Castanea mollissima	27.709	117.749	619	5.21531	12.8	2096.6	5.21531	0.346272	0.308197	0.18522	15.0613	16.922	1.12354	4.48	2.56032
	Castanopsis carlesii
	Castanopsis eyrei
	Castanopsis fargesii
	Castanopsis fordii
	Cyclobalanopsis glauca
	Castanopsis faberi	27.7215	117.653	1021	4.20294	12.8	2096.6	4.20294	0.254588	0.241253	0.84515	16.5088	17.4213	1.05528	4.5	2.53058
	Castanopsis lamontii	27.0504	118.144	347	5.44933	12.8	2096.6	5.44933	0.364102	1.03121	0.859804	14.9665	5.28439	0.353082	4.41	2.62676
Xianggelila (XG)	Quercus monimotricha	27.9056	99.6363	3371	10.4357	5.8	618.4	10.4357	0.638369	0.3975	6.82	16.3474	26.2532	1.60596	5.53	2.5756
	Quercus senescens
Gutianshan (GT)	Castanea mollissima	29.2436	118.111	364	4.03385	15.3	1963.7	4.03385	0.208	0.136055	1.07184	19.3935	29.6486	1.52879	4.68	2.5718
	Castanea seguinii
	Castanopsis carlesii
	Castanopsis eyrei
	Castanopsis sclerophylla
	Castanopsis tibetana
	Cyclobalanopsis glauca
	Lithocarpus glaber
	Castanea henryi	29.2556	118.148	846	6.95741	15.3	1963.7	6.95741	0.345666	0.218209	0.80491	20.1275	31.8842	1.58411	4.2	2.62489
	Castanopsis fargesii
	Cyclobalanopsis myrsinifolia
	Quercus phillyraeoides
	Quercus serrata
Lushan (LU)	Castanea henryi	29.5641	115.957	1029	6.09142	11.9	1918	6.09142	0.395561	0.401341	1.00678	15.3995	15.1776	0.985596	4.14	2.62038
	Castanopsis eyrei
	Castanopsis sclerophylla
	Cyclobalanopsis glauca
	Quercus fabri
	Quercus serrata	29.5986	115.942	70	1.57063	11.9	1918	1.57063	0.114375	0.231419	0.950815	13.7323	6.78695	0.494233	4.31	2.62252
	Castanea mollissima	29.5641	115.974	1020	6.8065	11.9	1918	6.8065	0.396615	0.362363	0.83106	17.1615	18.7837	1.09453	3.97	2.60342
	Castanea seguinii
	Cyclobalanopsis myrsinifolia
Linzhi (LZ)	Quercus aquifolioides	29.6673	94.3156	3104	9.51642	8.7	688.1	9.51642	0.40373	0.810265	8.44653	23.5712	11.7448	0.498269	4.81	2.54165
Lulang (LL)	Quercus aquifolioides	29.7017	94.7263	3521	10.2111	8.7	688.1	10.2111	0.459538	0.615857	4.95951	22.2204	16.5804	0.746176	4.07	2.4917
Badagongshan (BD)	Castanea seguinii	29.7686	110.088	1427	11.3871	11.5	2105.4	11.3871	0.795338	0.777619	1.14726	14.3173	14.6435	1.02279	4.21	2.60967
	Cyclobalanopsis gracilis
	Cyclobalanopsis multinervis
	Fagus lucida
	Quercus engleriana
	Quercus serrata
Tiantongshan (TT)	Castanopsis carlesii	29.8009	121.788	143	10.367	16.2	1374.7	10.367	0.667067	0.445982	1.78768	15.5412	23.2453	1.49573	3.78	2.60488
	Castanopsis fargesii
	Castanopsis sclerophylla
	Cyclobalanopsis glauca
	Cyclobalanopsis gracilis
	Cyclobalanopsis myrsinifolia
	Cyclobalanopsis sessilifolia
	Lithocarpus glaber
Bomi (BM)	Quercus aquifolioides	29.8679	95.761	2761	4.20994	8.7	845	4.20994	0.252247	0.356596	20.4062	16.6897	11.8059	0.707374	5.28	2.46106
Dujiangyan (DJ)	Castanea henryi	30.9069	103.558	1182	13.3436	15.2	1244	13.3436	0.826155	0.62307	1.87008	16.1514	21.4158	1.32594	3.81	2.61427
	Castanopsis carlesii
	Cyclobalanopsis glauca
	Lithocarpus glaber
	Lithocarpus hancei
	Quercus serrata
	Castanea mollissima	31.0611	103.717	740	8.09494	15.2	1244	8.09494	0.434131	0.31517	1.11479	18.6463	25.6843	1.37745	3.74	2.66293
	Castanopsis ceratacantha
	Castanopsis fargesii
	Quercus acutissima
	Quercus variabilis
Shennongjia (SN)	Castanea henryi	31.3228	110.489	1348	3.11808	10.6	1330	3.11808	0.213284	0.561296	3.77391	14.6194	5.55515	0.379984	5.06	2.62684
	Castanea seguinii
	Cyclobalanopsis glauca
	Cyclobalanopsis multinervis
	Cyclobalanopsis oxyodon
	Fagus engleriana
	Lithocarpus glaber
	Quercus serrata
	Quercus variabilis
	Fagus hayatae	31	110	1500	4.5296	10.6	1330	4.5296	0.310373	0.576942	3.96426	14.5941	7.85105	0.537962	4.98	2.65391
Jigongshan (JS)	Castanea seguinii	31.867	114.088	194	2.89098	15.2	1118.7	2.89098	0.137377	0.389681	3.85146	21.0442	7.41884	0.352536	4.32	2.47433
	Cyclobalanopsis glauca
	Quercus acutissima
	Quercus aliena
	Quercus variabilis
Taibaishan (TB)	Quercus wutaishanica	34.0114	107.436	1736	17.6822	11.4	910.6	17.6822	1.16329	0.750087	17.4508	15.2002	23.5735	1.55087	5.93	2.45968
	Quercus acutissima	33.4442	108.879	1846	26.0503	11.4	910.6	26.0503	1.37819	1.15199	27.0463	18.9018	22.6132	1.19635	6.66	2.52706
	Quercus aliena	33.4411	108.446	1668	3.65665	11.4	910.6	3.65665	0.305485	0.917193	14.9218	11.97	3.98679	0.333065	6.06	2.39996
	Castanea seguinii	33.4531	108.391	1300	1.2041	11.4	910.6	1.2041	0.0886774	1.93788	37.373	13.5785	0.62135	0.0457599	5.12	2.29672
Taishan (TS)	Quercus acutissima	36.2108	117.103	378	3.62138	13.2	915.3	3.62138	0.225635	0.304274	13.3278	16.0497	11.9017	0.741552	5.03	2.50942
	Quercus dentata
	Quercus mongolica	36.2437	117.068	607	4.56279	13.2	915.3	4.56279	0.316868	0.41792	6.44322	14.3997	10.9179	0.758202	4.43	2.55152
	Quercus variabilis
Taiyueshan (TY)	Quercus wutaishanica	36.6625	112.105	1511	15.7142	6.2	662	15.7142	0.983239	0.735835	18.4303	15.9821	21.3556	1.33622	6.43	2.54252
Donglingshan (DL)	Quercus wutaishanica	39.958	115.429	1277	7.10355	4.8	600	7.10355	0.534693	0.838095	17.7655	13.2853	8.47584	0.637987	6.71	2.5274
Wulingshan (WL)	Quercus mongolica	40.5847	117.443	650	2.84929	7.6	763	2.84929	0.213571	0.422065	5.13091	13.3412	6.75085	0.506015	5.65	2.53036
Changbaishan (CB)	Quercus mongolica	42.4033	128.099	757	11.9965	3.6	700	11.9965	0.878869	1.00884	12.3937	13.65	11.8914	0.87117	5.63	2.5784
Liangshui (LS)	Quercus mongolica	47.1795	128.897	371	11.7946	-0.3	676	11.7946	0.702987	1.02579	13.0125	16.7778	11.4981	0.685315	5.64	2.58934
Wudalianchi (WD)	Quercus mongolica	48.6642	126.282	363	6.12728	-0.3	500	6.12728	0.442455	1.53654	11.4485	13.8483	3.9877	0.287955	5.43	2.57066
Jiagedaqi (JD)	Quercus mongolica	50.4277	124.122	467	6.71902	-1.5	490	6.71902	0.453276	1.34929	7.339	14.8232	4.97969	0.335938	5.61	2.52518
C, total soil carbon; N, total soil nitrogen; P, total soil phosphorus; Ca, total soil calcium; PSD, particle size distribution; MAT, Mean annual temperature; MAP, Mean annual precipitation
