# Supplementary material for: Host Phylogeny Is a Major Determinant of Fagaceae-Associated Ectomycorrhizal Fungal Community Assembly at a Regional Scale
Source: Front Microbiol. 2018 Oct 10;9:2409. doi: 10.3389/fmicb.2018.02409 (PMC6191505; doi:10.3389/fmicb.2018.02409)
Supplement: Supplementary file 3 [file Table_2.XLSX]

## Sheet: Sheet1
Supplementary Table 2. Molecular identification of fungi investigated in this study.
OTUs	Rep.Seqs No.	ENA accession No.	Sequence	Kingdom	Phylum	Class	Order	Family	Genus	EcM_lineage	ref.UNITE+INSDC.match	ref.UNITE+INSDC.Coverage	ref.UNITE+INSDC.Evalue	ref.UNITE+INSDC.identitiy
OTU1	1_10138|F|ITS2;size=494453;	LT979428	ACACCTCAACTCTCATGGTTTGCCATGATGAGCTTGGACCCTGGGGGTTTGCTGGCCTGTAGTCAGCTCCTCTCAAATGAATCAGCCTCCAAGTGTTTGGTGGCATCACGGGTGTGATAACTATCTACGCTCGCTGTTGTCTGCCAGGTAACCTTTGGTGACAAAGGTTCGCTGGAGCTCACAGATGTCTCTCCTCAGCGAGGACAGCTTTTTGAAC	Fungi	Basidiomycota	Agaricomycetes	Thelephorales	Thelephoraceae	Thelephora	tomentella-thelephora	gb|KP866134.1	100	2.11e-108	100
OTU2	1_13776|F|ITS2;size=10565;	LT978654	ACACCTCAACTCCTCATGGTTTTCTATGATGAGCTTGGACTTTGGGGGTTTGCTGGCCCATTCGGTCAGCTCCTCTCAAATGAATCAGCTTACCAGTGTTTGGGGGCACCACAGGTGTGATAACAATCTACGCTTGAGGTTTTCCACCATGTAACCTTCAGCAATGGGGTTTCACTGGGGCTCACAAATGTCTTTCTTCAGTGAGGACAGCTCTTTGAAC	Fungi	Basidiomycota	Agaricomycetes	Thelephorales	Thelephoraceae	Tomentella	tomentella-thelephora	emb|LN910771.1	100	4.65e-105	98.64
OTU3	1_14|F|ITS2;size=9699;	LT980216	AAATCTCAACCTCCTTTGTTCCTTCTGAGGATCAAAGGAGGCTTGGACTTTGGAGGTCTTTGCTGGCGTCTTTAAAGGCCAGCTCCTCTCAAATGAATTAGCGGGGTCCTCTTTGCCGATCCTTGACATGTGATAAGATGCTTCCGTGTCTTGGTTTTCTGGCTCTGTTGCCTTTGGGACCCGCTTCTAATCGTCTTGACCTTGCGTCGAGACAATGTTCGAGCTCGTCTCCCTTCTCGGGAAACCCCTCGACCCCACGAAC	Fungi	Basidiomycota	Agaricomycetes	Russulales	Russulaceae	Lactarius	russula-lactarius	KM576506	100	1e-117	95.83
OTU4	1_1781|F|ITS2;size=4207;	LT980541	ATATATCAACCTCTTCAGGTTTTTACTTGTCGAGTGTTTGGATGTGGGGGTTTCTTTTGCCGGTCTCTTTTGAGGTCAGCTCCCCTGAAATGCATTAGCAGAACAATTTGTTGACTCGTTCATTGGTGTGATAACTATCTACGCTATTGACGGTGAAGCAGGTTCAGCTTCTAATAGTCCATTGACTTGGACAAATTTTCATTA	Fungi	Basidiomycota	Agaricomycetes	Agaricales	Cortinariaceae	Cortinarius	cortinarius	KJ705115	100	1e-91	96.57
OTU5	1_18492|F|ITS2;size=10380;	LT978655	ACACCTCAACTCTCATGGTTTGCCATGATGAGCTTGGACTTTGGGGGTCTTGCTGGCACAACCGTCGGCTCCTCTCAAATGAATCAGCTTTCCAGTGTTTGGTGGCGTCACAGGTGTGATAACTATCTACGCTTGTGGTTTTCCATCAGGTTACCTTCAGCAATGAAGGTTCACCGGAGCTTACAGACGTCTCTCCCTTTGGGATGACAGCTTTTGAAC	Fungi	Basidiomycota	Agaricomycetes	Thelephorales	Thelephoraceae	Tomentella	tomentella-thelephora	emb|LN911874.1	100	3.91e-86	93.64
OTU6	1_18722|F|ITS2;size=53008;	LT978656	ACACCTCAACTCTCGTGGCCTTGCCATGATGAGCTTGGACTTTTGTGGGGGTCTTGCTGGCCTGTGGTCAGCTCCTCTGAAATGAATAAGCTTGCCAGTGTTTGGTGGCATCACAGGTGTGATAACTATCTACGCTTGTGGTTTTCCACCAGGTAACCTTCAGCGATGAAGGTTCGCTGGGGCTCATAAATGTCTCTCCTCAGCGAGGACAGCTCTTTGAAC	Fungi	Basidiomycota	Agaricomycetes	Thelephorales	Thelephoraceae	Tomentella	tomentella-thelephora	gb|JX625338.1	100	7.89e-93	95.11
OTU7	1_18744|F|ITS2;size=25428;	LT980217	AAATCTCAACCTTCTTGGTTTCTTCTGGACACCAAAGGAGGCTTGGACTTTGGAGGCCTTTGCTGGCGTCTCTCTTCTTTTGAAGGCCAGCTCCTCTTAAATCGATTAGCGGGGTCCTCTTTGCCGATCCTTGACGTGTGATAAGATGTTTCCATGTCTTGGCTTCTGGCTCTGTTGCCTTTGGGACCCGCTTCTAACCGTCTCAGCCTTGTGCATCGAGACAACGTTTGAGCGTGTCTCCCTTCTCGGGAAACGCTCTCGACCCCACGAAC	Fungi	Basidiomycota	Agaricomycetes	Russulales	Russulaceae	Lactarius	russula-lactarius	gb|KJ769279.1	100	5.93e-114	94.49
OTU8	1_18893|F|ITS2;size=51331;	LT980218	AAATCTCAACCTCCTTGGTTTCTTTTGGAGACCAAAGGAGGCTTGGACTTTGGAGGCGTTTGCTGGGACCTTCAAAGGCCAGCTCCTCTTAAATGTATTAGCGGGGTCCTCTTTGCCGGTCCTTGACATGTGATAAGATGCTTCCGTGTCTCGGTTCCTGGCTCTGTTAACTTTGGGACCCGCTTCTAAACCGTCTAGACCCAGGTCGAGACAATGTTCGAGGAAACCTCCTCGACCCCACGAAC	Fungi	Basidiomycota	Agaricomycetes	Russulales	Russulaceae	Lactarius	russula-lactarius	gb|KT165293.1	90.61	3.75e-76	90.63
OTU9	1_19073|F|ITS2;size=6662;	LT980542	ATATATCAATCTCTTCAGCTTTTACTTGTTGAGCATTGGATGTGGGGGTCTTTTGCTGGTCTTTTGAAAGAGATCAGCTCCCCTAAAATGTATTAGCAGAACATTTTGTTGATTGTTCATTGGTGTGATAATTATCTACGCTATTGACATCAGGCAGTTCAGCTTCTAACAGTCCATTGACTTGGACAATTTTATTA	Fungi	Basidiomycota	Agaricomycetes	Agaricales	Cortinariaceae	Cortinarius	cortinarius	emb|HF565072.1	100	3.96e-76	93.47
OTU10	1_19192|F|ITS2;size=40257;	LT980219	AAATCTCAACCTCCTTGGTTTCTTCTGGGAGACCAATGGGGGCTTGGACTTTGGAGGCCTTTGCTGGTGTCCCTCTCTTTTGAAGGCCCAGCTCCTCTTAAATGAATTAGCGGGGTCCTCTTTGCCGATCCTCGACATGTGATAAGATGTTTCCGTGTCTTGGTCTCTGGCTCTGTTGCCTTTGGGACCCGCTTCTAATCGTCTCAACATTGCATCGAGACAAATGTCTGAGCGTGTCTCCCTCTCCAGGGAAGCTCTCTCGACCTCACGAAC	Fungi	Basidiomycota	Agaricomycetes	Russulales	Russulaceae	Lactarius	russula-lactarius	KF432984	100	1e-138	99.27
OTU11	1_19474|F|ITS2;size=8591;	LT978657	ACACCTCAACTCTCATGGTTTGCCATGATGAGCTTGGACTTTGGAGGTCTTGCTGGCCTACGGTCGGCTCCTCTTGAATGAATCAGCTTGCCAGTGTTTGGTGGCGTCACAGGTGTGATAACTATCTACGCTTGTGATTTTCTGCCAGGTAACCTTCAGTGATGGAGGTTCGCTGGGGCTCACAAATGTCTCTCCTGAGCGAGGACAGCTTTTTAAT	Fungi	Basidiomycota	Agaricomycetes	Thelephorales	Thelephoraceae	Tomentella	tomentella-thelephora	UDB018459	100	6e-111	100
OTU12	1_19824|F|ITS2;size=2891;	LT978658	ACACCTCAACTCTCATGGTTCGCCGTGATGAGCTTGGAGTCTGGAGGTTTTGCTGGTCTCTGGTCAGCTCCTCTCAAATGAATCAGCTTGCCGGTATCTGGTGGCGTCATGGGTGTGATAACTATCTACGCTCAGGACCGTCTACTAGGTAACCTCCAGTGATGGAGGTTTGCTGGGGCTCACAGACGTCTCCCTTCAGTGGGGACAGCTTTTTGAAC	Fungi	Basidiomycota	Agaricomycetes	Thelephorales	Thelephoraceae	Tomentella	tomentella-thelephora	gb|GQ240908.1	100	2.2e-93	95.87
OTU13	1_19946|F|ITS2;size=23632;	LT978659	ACACCTCAACTCTCATGGTTTGCCATGATGAGCTTGGACTCTGGGGGTTTTGCTGGCCTATGGTCAGCTCCTCTCAAATGAATCAGCTTGCCGGTGTTTGGTGGCGTCACAAGTGTGATAACTATCTACGCCTGTGATTGTCCACCAGGTAACCTTCAGCAATGGAGGTTCACTGGGGCTCATAGACGTCTCTCCTCGGTGAGGACAGCTTTGAAC	Fungi	Basidiomycota	Agaricomycetes	Thelephorales	Thelephoraceae	Tomentella	tomentella-thelephora	gb|KP123615.1	98.15	3.04e-82	93.4
OTU14	1_2|F|ITS2;size=136823;	LT978660	ACACCTCAACTCTCATGGTTCGCCATGATGAGCTTGGACTTTGGAGGCTTTGCTGGCCTGTGGTCGGCTCCTCTCAAACAAATCAGCTTACCGGTGTACTGGTGGCATCACAGGTGTGATAACTATCTACGCTTGTGGTCGTCTGCCGAATTTTCTGGGGCTCATAAATGTCTCCCGAGTGAAGACAGCCTTCTGAAC	Fungi	Basidiomycota	Agaricomycetes	Thelephorales	Thelephoraceae	Tomentella	tomentella-thelephora	UDB003335	98	2e-65	97.28
OTU15	1_20084|F|ITS2;size=51443;	LT978661	ACACCTCAACTCTCATGGTTTGCCATGATGAGCTTGGACTTTGGGGGTTTTGCCGGCCTATGGTTGGCTCCTCTCAAATGAATCAGCTTGCCAGTGTTTGGTGGCATCACAGGTGTGATAACTATCTACGCTTGCGATTGCCCACTAGGTAACCTTCAGCAATGGAGGTTCGCTGGGGCTCATAGACGTCTCTCCTTAGCGAGGACAGCTTTTGAAC	Fungi	Basidiomycota	Agaricomycetes	Thelephorales	Thelephoraceae	Tomentella	tomentella-thelephora	dbj|AB848650.1	100	1.01e-101	98.16
OTU16	1_20320|F|ITS2;size=13748;	LT978662	ACACCTCAACTCTCATGGCTTGCCATGACGAGCTTGGACTTTGGGGGTCTTGTTGGCCTGTGAGCCAGCTCCTCTTAAATAAATCAGCTTGCCGGTGTTTGGTGGCGTCACAGGTGTGATAACTATCTACGCTTGTGGTTTCCCATCAGGTAACCTTCAGCAATGAAGGTTCATCGGAGCTTATAAATGTCTCTCCTTGAGCGAGGACAGATTTTGACC	Fungi	Basidiomycota	Agaricomycetes	Thelephorales	Thelephoraceae	Tomentella	tomentella-thelephora	gb|JX630406.1	100	6e-94	95.89
OTU17	1_20556|F|ITS2;size=5698;	LT978663	ACACCTCAACTCTCATGGCTTGCCATGACGAGCTTGGACTTTGGGGGTCTTGCCGGCATAACCGTCGGCTCCTCTCAAATGGATCAGCTTGCCAGTGTTTGGTGGCGTCACAGGTGTGATAACTATCTACGCTTGTGGTCTTCCATCAGTTTACCTTCAGTGATGGAGGTTCATTGGAGCTTACAGACGTCTCTCCTCGGGGAGGACAGCTTTTCAAAC	Fungi	Basidiomycota	Agaricomycetes	Thelephorales	Thelephoraceae	Tomentella	tomentella-thelephora	emb|LN911874.1	97.72	2.34e-88	94.86
OTU18	1_20762|F|ITS2;size=15470;	LT978664	ACACCTCAACTCTCATGGCTTGCCATGATGAGCTTGGACTTATGGGGGTCTTGCTGGCCTATGGTCGGCTCCTCTCAAATGAATCAGCTTGCCAGTGTTTGGTGGCGTCACAGGTGTGATAACTATCTACGCTTGTGGTTTCCCACCAGGTAACCTTCAGCAATGGAGATTCGCTGGGGCTCATAAAAGTCTCTCCTCGGTGAGGACAGCTCTTTGAAC	Fungi	Basidiomycota	Agaricomycetes	Thelephorales	Thelephoraceae	Tomentella	tomentella-thelephora	gb|JF748079.1	100	1.67e-104	98.63
OTU19	1_20934|F|ITS2;size=6799;	LT978665	ACACCTCAACTCTCATGGCTTGCCATGATGAGCTTGGACTTTGGGGGTCTTGTTGGCCTGTGAGCCAGCTCCTCTTAAATGAATTAGCTTGCCGGTGTTTGGTGGCATCATGGGTGTGATAATTATCTACGCTTGTGGTTTCCCACCAGATAACCTTCAGCAATGGAGGTTCGCTGGGGCTTATAAATGTCTCTCCTCGGCGAGGACAGATTTTGACC	Fungi	Basidiomycota	Agaricomycetes	Thelephorales	Thelephoraceae	Tomentella	tomentella-thelephora	dbj|LC035344.1	100	2.77e-97	96.79
OTU20	1_20967|F|ITS2;size=6099;	LT978666	ACACTTCAACTCTCATAGCTTGCTGTGATGAGCTTGGACTTTGGGGGTCTTGCTGGCCTGTGGTCAGCTCCTCTCAAATGAATTAGCTTTCCAGTGTTTGGTGGCATCACGGGTGTGATAACTATCTACGCTTGTGGTTTCCATCAGATAACCTTTGGGTTCGCTGGAGCTCATAGATGTCTCCTCAGTGAGGACAGCTCTTTGAAC	Fungi	Basidiomycota	Agaricomycetes	Thelephorales	Thelephoraceae	Tomentella	tomentella-thelephora	AY310869	100	2e-71	89.91
OTU21	1_21130|F|ITS2;size=4512;	LT978667	ACACCTCAACTCTCATGGCTTGCCATGATGAGCTTGGACTTTGGGGGTCTTGCTGGCCTATGGTCAGCTCCTCTCAAATGGATTAGCTTTCCAGTGTTTGGTTGGCATCACAGGTGTGATAACTATCTACGCTTGTGGTTTCCACCAGGTAACCTTCAGTAACATGGGGGTTTGCTGGAGCTCATAAATGTCTCTCCTCAGTGGGGACAGCTCTTTGAAC	Fungi	Basidiomycota	Agaricomycetes	Thelephorales	Thelephoraceae	Tomentella	tomentella-thelephora	gb|HM105561.1	100	2.13e-103	98.18
OTU22	1_21222|F|ITS2;size=5323;	LT978668	ACACCTCAACTCTCATGGCTTGCCATGATGAGCTTGGACTTTGGAGGTCTTGTTGGCCTATGAGCCAGCTCCTCTCAAATGAATTAGCTTGCCAGTGTTTGGTGGCGTCACAGGTGTGATAACTATCTACGCTTGTGGTTTCCCACCAGGTAACCTTCAGCGATGGAGGTTCATTGGAGCTTATAAACGTCTCTCCTCAGCGAGGACACATTTTGACC	Fungi	Basidiomycota	Agaricomycetes	Thelephorales	Thelephoraceae	Tomentella	tomentella-thelephora	UDB014183	100	3e-108	99.09
OTU23	1_21368|F|ITS2;size=68;	LT978669	ACATCTCAACTCTCATGGTTTCCCGTGATGAGATTGGACTTTGGGGGTCTTGTTGGCTTGTGTTCAGCTCCCCTCAAATCTATCAGCTTCCCAGTGTTTGGCGGCGTCACAGGTGTGATAAATATCTACGCTTGTGGTTCTTTGCCAGATCTGTCCTCTCCTTGTGGAGGGCTCACTGGAGCTTATAGATGTCTCTCCTTGGTGGAGACAGCTGTTTGAA	Fungi	Basidiomycota	Agaricomycetes	Thelephorales	Thelephoraceae	Tomentella	tomentella-thelephora	UDB016341	100	3e-109	99.09
OTU24	1_21405|F|ITS2;size=18;	LT978670	ACACCTCAACTCTCATGGCTTGCCATGATGAGCTTGGACTTTGGAGGTCTTGCTGGCCACATGCAGGTCAGCTCCTCTCAAATGAATTAGCTTGCCAGTGTTTGGCGGCATCACAGGTGTGATAACTATCTACACTTGTGGTTTTCTGCCAGGTAATCTTCAGCAGTGGAGGTTCACTGGGGCTCATAAACATCACCCTCTCTTTAATGGGGGGCATGTTTTGATT	Fungi	Basidiomycota	Agaricomycetes	Thelephorales	Thelephoraceae	Tomentella	tomentella-thelephora	gb|AY635174.1	88.5	2.4e-68	91.05
OTU25	1_21508|F|ITS2;size=11606;	LT980220	AAACCTCAACCTCCTTGGTTTCTTCTGGAGACCAAAGCAGGCTTGGACTTTGGAGGCCTTTGCTGGTGCCTCTCTTTTTGAAGGCCAGCTCCTCTTAAACAAATTAGCAGGGTCCTCTTTGCTGATCCTCGACGTGTGATAAGATGTTTCCATGTCTTGGTTTCTGGCTCTGTCACTTTTGGGACCTGCTTCTAACTGTCTGGACCTTGTGTTGAGACAACGTTCGAGCGTGTGCCTCCCTTCTCGGGAAAGCTCCCTCGACCCCACGACC	Fungi	Basidiomycota	Agaricomycetes	Russulales	Russulaceae	Lactarius	russula-lactarius	JF273531	100	3e-139	99.63
OTU26	1_21543|F|ITS2;size=28204;	LT978671	ACACCTCAACTCTCATGGCTTGCCATGATGAGCTTGGACCTTGGGGGTCTTGCTGGCATACGCAATGTAGGTCAGCTCCTCTCAAATGAATCAGCTCGCCAGTGTTTGGTGGCATCACAGGTGTGATAATTATCTACGCTTGTGGTGTTCCACCAGGTAACCTTCAGCGATGGAGGTTCACTGGAGCTCATAAATGTCTCTCCTTGGTGAGGACATATTTTGACC	Fungi	Basidiomycota	Agaricomycetes	Thelephorales	Thelephoraceae	Tomentella	tomentella-thelephora	gb|EU625861.1	100	1.34e-80	92
OTU27	1_21863|F|ITS2;size=2437;	LT978672	ACACCTCAACTCTCATGGTCTGCCATGACGAGCTTGGACTTTGGGGGTCTTGCCGGCCTAGCGTCGGCTCCTCTCAAATGGATCAGCTTCCCAGTGTTTGGTGGCGTCACAGGTGTGATAACTATCTACGCTTGTGGTTTTCCGCCATTAACCTTCAGCAATGGAGGTTCGCTGGAGCTCACAGATGTCTCTCCTTGAGGAGGACAGCTTCTTGAAC	Fungi	Basidiomycota	Agaricomycetes	Thelephorales	Thelephoraceae	Tomentella	tomentella-thelephora	gb|JF506834.1	99.54	3.56e-101	98.15
OTU28	1_22358|F|ITS2;size=68359;	LT978673	ACACCTCAACTCGCATGGTTCGCCATGACGAGCTTGGATTTTGGAGGCTTTGCCGGCCCGTGGTCGGCTCCTCTCAAATGAATCAGCTTCCGGTGTATTGGTGGCGTCGCAGGTGTGATAACTATCTACGCTCGCGTTCGTCTGCCAGACAACCTCCAGCACTGTTGGAGGTTTGCTGGGGCTTATAAACGTCTCCCGAGTGAAGACAGCCTTCTGAAC	Fungi	Basidiomycota	Agaricomycetes	Thelephorales	Thelephoraceae	Tomentella	tomentella-thelephora	gb|GU553375.1	100	1.03e-76	90.95
OTU29	1_22613|F|ITS2;size=3758;	LT979770	CATTCTCAAACCTTCTCGGTTTCTCGACCGGAAAGGCTTTGGACTTTGGAGGCTTTTGCTGACCTTCCTTTGTTGGAAACAGCTCCTCTGAAATGAATTAGTAGGGTCTACTTTGCCGATCCTTGACGTGATAAAATGTTTTCTACGTCTCGGGTTTCGCACTGTTTTGTCCTGGATCCTGCTTCTAACCGTCTCTCAGAAGACAGATGGTCGAGCGATCGTCGCTCGACCCACGAA	Fungi	Basidiomycota	Agaricomycetes	Russulales	Russulaceae	Russula	russula-lactarius	AB509717	99	3e-119	99.57
OTU30	1_22620|F|ITS2;size=116;	LT978674	ACACCTCAACTCTCATGGCTTTGCCATGATGAGCTTGGATTTTGGGGGTCTTTGCTGGCCTGTGGTCAGCTCCTCTCAAATGAATCAGCTTGCCAGTGTTTGGTGGCGTCACAGGTGTGATAACTATCTACGCTTGTGGCTTTCCACCGGATAACCTTCAGTGATGAAGGTTCGCTGGAGCTCATAAATGTCCTCTCCTTAGCGAGGACAGCCCTTTGAAC	Fungi	Basidiomycota	Agaricomycetes	Thelephorales	Thelephoraceae	Tomentella	tomentella-thelephora	gb|JF506817.1	99.55	1.68e-89	94.55
OTU31	1_22785|F|ITS2;size=539;	LT978675	ACACCTCAACTCTCATGGTTTGCCATGATGAGCTTGGACTTTGGAGGCTTTGCTGGCCTGTGGTCAGCTCCTCTTAAACGAATCAGCTTACCGGTGCATTGGTGGCGTCACAGGTGTGATAACTATCTACGCTTGTGGTCGTCCGCCAGACAACCTCCGGCATCGTCGGAGGTTTGCCGGGGCTCATAAACGTCTCCCAAGCGAAGACAGCCTTCTGAAC	Fungi	Basidiomycota	Agaricomycetes	Thelephorales	Thelephoraceae	Tomentella	tomentella-thelephora	gb|GU553375.1	100	1.01e-86	93.67
OTU32	1_22792|F|ITS2;size=911;	LT978676	ACACCTCAACTCTCATGGTCTGCCATGATGAGCTTGGACTTTGGGGGTCTTGCCGGCTTAACCGTCAGCTCCTCTCAAATGAATCAGCTTGCCAGTGTTTGGTGGCGTCGCAGGTGTGATAACTATCTACGCTTGTGGACTTCCACCAGGTTACCTTCAGTAATGGGGGTTCGCTGGAGCTCACAGATGTCTCTCCTCAGTGAGGACAGCTTTTTTAT	Fungi	Basidiomycota	Agaricomycetes	Thelephorales	Thelephoraceae	Tomentella	tomentella-thelephora	gb|KR019828.1	98.62	7.89e-93	95.85
OTU33	1_23049|F|ITS2;size=26457;	LT978677	ACACCTCAACTCTTTATGGTTTTCCATGATGAGCTTGGACTTTGGGGGTTTTGCTGGCCTATGGTTGGCTCCTCTAAAATAAATCAGCTTACCAGTGTTTGGTGGGTATCATGGGTGTGATAACTATCTACGCTTGCGGTTCCTCCACCAGGTAACCTTCGACAGCGGAGGTTCACTGGAGCTCATAGATGTCTCTCCTTAGTGAGGACAGCCCTTTGAAT	Fungi	Basidiomycota	Agaricomycetes	Thelephorales	Thelephoraceae	Tomentella	tomentella-thelephora	UDB007524	100	2e-96	95.5
OTU34	1_23105|F|ITS2;size=39553;	LT978678	GCACCTCAACTCTCGTGGTCTTCCACGATGAGCTTGGACTCTGGAGGTTTGCTGGCCCTGTGGCCGGCTCCTCTCAAATGAATCAGCTTTCCGACGTTCGGTGGCATCGCAAGCGTGATAACTATCTACGCTCGTGGTCGTCTGCCGGGTAACCCTCAGCAATGGAGGTTCGTTGGGGCTTATAAACGTCTCTCCTCGGCGAGGACAGCTTTTGAAC	Fungi	Basidiomycota	Agaricomycetes	Thelephorales	Thelephoraceae	Tomentella	tomentella-thelephora	emb|HG426026.1	99.54	1.35e-75	90.74
OTU35	1_23204|F|ITS2;size=259;	LT978679	ACATCTCAACTCTCATGGCTTGCCGTGATGAGCTTGGACTTTGGGGGTCTTGCTGGCCTGTGGTCGGCTCCTCTCAAATGGATAAGCTTGCCAGTGTTTGGTGGCGTCCTGGGTGTGATAACTATCTACGCTTGTGGTCGTCTGCCAGGTAACCTCCGGCAATGGAGGTTCGCTGGGGCTCATAACGTATCTCTCCTCTGTGAGGGTGGCTCTCGAAC	Fungi	Basidiomycota	Agaricomycetes	Thelephorales	Thelephoraceae	Tomentella	tomentella-thelephora	dbj|LC013819.1	94.04	8.18e-68	90.24
OTU36	1_23541|F|ITS2;size=11090;	LT980221	AAACCTCAACCTCCTTGGTTTCTTTCAAGAGACCAATGGAGGCTTGGACATTGGAGGCCTTTGCTGGCGTCTCTTTCTCTTGAAAGCCCAGCTCCTCTTAAATGAATTAGTGGCGTCCTCTTTGCCCATCCTCGACATGTGATAAGATGTTTCCGTGTCTTGGTCTCTTGGCTCTGCCGCTTTTGGGACCCGCTTCTAATCGTCTCAACCTTGCATCGAGACAAATGTCTGAGCGTGTCTCCCTTCCCTGGGAAACTCTCTCGACCTCATGAAC	Fungi	Basidiomycota	Agaricomycetes	Russulales	Russulaceae	Lactarius	russula-lactarius	AB848537	100	7e-106	92.34
OTU37	1_23805|F|ITS2;size=3770;	LT980222	AAACCTCAACCTCCTTGGTTTCTTCTGGAGACCGAAGGAGGCTTGGACTTTGGAGGCATTTGCTGGACTTTTGAAGCCCAGCTCCTCTCAAATGAATTAGCGGGGTCCTCTTTGCCGGTCCTTGACACGTGATAAGATGCTTCCGTGTCTCGGTTTCTGGCTCTGTCGCCTTTGGGACCCGCTTCTAACCGTCTAGACCTAGGTCGAGACAACGTTCGAGCTCGTCTCCCTTCTCGGGAGACCTTCTCGGCCCCACGAAC	Fungi	Basidiomycota	Agaricomycetes	Russulales	Russulaceae	Lactarius	russula-lactarius	UDB015539	100	2e-95	90.87
OTU38	1_2385|F|ITS2;size=3154;	LT980223	AAATCTCAACCTCCTTTGTTTCTTCTGAGGGCCAAAGGAGGCTTGGACTTTGGAGGTTTTTGCTGGCGTCTTCTCTTTGAAAGGCCAGCTCCTCTTAAATGAATTAGCGGGGTCCTCTTTGCCGATCCTTGACATGTGATAAGATGCTTCCGTGTCTTGGTTCCTGGCTCTGTTGCCTTTGGGACCCGCTTCTAACCGTCTTGACCTTGCATCGAGACAACGTTCGAGCTCGTCTCCCTTCTTGGGAAACCCCCTCGACCTCACGAAC	Fungi	Basidiomycota	Agaricomycetes	Russulales	Russulaceae	Lactarius	russula-lactarius	KC691205	100	2e-111	94.07
OTU39	1_23876|F|ITS2;size=832;	LT978680	ACATCCTCAACTCTCACGGCTTGCCGTGATGAGCTTGGACTTTGGAGGTCTTTGCTGGGCTTTTGCAGGTCAGCTCCTCTCAAATGGATCAGCTTTACCGGTGTTCGGTGGCATCACAGGTGTGATAACTATATCTACGCTTGTGCCTTTCCACCGGGGTAACCTTCGTCACTGAAGGTTCACTGGGGGCTCATAAATGTCTCTCCTCAGTGAAGACAGCTCTTTGAAC	Fungi	Basidiomycota	Agaricomycetes	Thelephorales	Thelephoraceae	Tomentella	tomentella-thelephora	dbj|AB848668.1	96.94	2.88e-82	92.48
OTU40	1_23890|F|ITS2;size=14108;	LT978681	ACACCTCAACTCTTGTGGCTTGCCACAATGAGCTTGGACTTTGGAGGTTTTGCTGGCCTGTGAGCCGGCTCCTCTCAAATGAATTAGCTTCCCAGTGTTTGGTGGCATCACGGGTGTGATAACTATCTACGCTTGTGGTGTTCCACCAGATAGCCTTCAGCAATGGAGGTCCGCTGGAGCTCATAAATGTCTCTCCTCAGTGAGGACAGTTTTGACC	Fungi	Basidiomycota	Agaricomycetes	Thelephorales	Thelephoraceae	Tomentella	tomentella-thelephora	GQ219947	100	1e-82	92.2
OTU41	1_24352|F|ITS2;size=7572;	LT978682	ACACCTCAACTCTCATGGTTCGCCGTGACGAGCTTGGACTTTGGAGGCTTTGCTGGCCTGCGGTCGGCTCCTCTCAAACAAATCAGCTTACCGGTGTATTGGTGGCGTCGCGGGTGTGATAACTATCTACGCTTGCGGTCGCCTGCCAAACAACCTCTGGCGCTGTCGGAGGTTTGCTGGGGCTCATAAACGTCTCCCGAGTGAAGACAGCCTTCTGAAC	Fungi	Basidiomycota	Agaricomycetes	Thelephorales	Thelephoraceae	Tomentella	tomentella-thelephora	UDB014179	100	3e-109	99.09
OTU42	1_24367|F|ITS2;size=2043;	LT978683	ACACCTCAACTCTCGTGGTTTGCTACGATGAGCTTGGACTTTGGGGGTTTTGCCGGCCTGTGGTCGGCTCCTCTCAAATGAATCAGCTTCCCAGCGTTTGGTGGAGTCGCAGGTGTGATAACTATCTACGCTTGTGGTTTTCGCCAGATAACCTTTGGTGACGGAGGTTCGTTGGGGCTCATAAACGTCTCTCCTCAGTGAAGACAGCTTTTGAAC	Fungi	Basidiomycota	Agaricomycetes	Thelephorales	Thelephoraceae	Tomentella	tomentella-thelephora	gb|JX630702.1	100	7.89e-93	95.85
OTU43	1_24403|F|ITS2;size=43;	LT981167	CAACCCTCAGGCCCTAGCCGGCCTGGCGTTGGGGCGCCTGCGGTTGACCGCAGGCCCTGAAAGATAGTGGCGGTGTCCGCTAGCACTCCGGGCGCAGTAGATCCCCTTCTCGCCGAGGACGTCTTGCGGGCTGCCGGCCGTAAAACACCTTTATTTTTCCCCTGGAA	Fungi	Ascomycota	Sordariomycetes	Sordariales	_	_	sordariales1	emb|LN909653.1	89.22	4.52e-59	95.3
OTU44	1_24691|F|ITS2;size=5892;	LT978684	ACACCTCAACTCTCATGGTCTACCATGATGAGCTTGGACTTTGGGGGTCTTGCCGGCCTAACCGTCGGCTCCTCTCAAAAGAATCAGCTTGCCAGTGTTTGGTGGCATCACGGGTGTGATAACTATCTACGCCTGCGCTCTTCCACCAGATAACCTTCAGTGATGGAGGTTCGCTGGAGCTCACAGACGTCCTCTTCCCATAGAGGACAGCTTTTGAAC	Fungi	Basidiomycota	Agaricomycetes	Thelephorales	Thelephoraceae	Tomentella	tomentella-thelephora	emb|FR852205.1	100	1.68e-99	97.26
OTU45	1_24758|F|ITS2;size=8405;	LT978685	ACATCTCAACTCTCATGGTTTCCCATGATGAGATTGGACTTTGGGGGTTTTGTTGGCTTATGTTCAGCTCCCCTCAAATCTATCAGCTTCCCAGTGTTTGGTGGCATCACAGGTGTGATAAATATCTACACTCGTGGTTGTTTGCCAGATCTGTCCTCTCCTCGCAGAGGGCTCGCTGGAGCTCATAGACGTCTCCTTGGTGGAGACAGCTGTTTGAA	Fungi	Basidiomycota	Agaricomycetes	Thelephorales	Thelephoraceae	Tomentella	tomentella-thelephora	gb|KT272111.1	100	4.7e-85	93.18
OTU46	1_25023|F|ITS2;size=927;	LT979429	ACACCTCAACTCTCATGGTTTGCCATGATGAGCTTGGACTCTGGGGGTTTTGCTGGCCTGCGGTCAGCTCCCCTCAAATGGATCAGCCTCCCAGTGTTTGGTGGCATCACGGGTGTGATAACTATCTACGCTCGCGATTGTCTGCCAGGTAACCTTTGGCAACAAAGGTTTGCTGGAGCTCACAAATGTCTCTCCTCAGTGGGGACAGCTTTTTGAAC	Fungi	Basidiomycota	Agaricomycetes	Thelephorales	Thelephoraceae	Thelephora	tomentella-thelephora	UDB018851	100	3e-93	94.95
OTU47	1_25327|F|ITS2;size=328;	LT979430	ACACCTCAACTCTCATGGTTCTCCATGATGAGCTTGGACTTCTGGGGGTTTTGCTGGCCTGTGGTCGGCTCCTCTCAAATGAATCAGCCTTCCAGTGTTTGGTGGCGCTATGGGTGTGATAACTATCTACGCTTGTGGTTGTCTGCCAGGTAACCTTTGGTGACAGAGGTTCGCTGGAGCTTACAAACGTCTCTCCTCAGTGAAGACAGCTTTTGACC	Fungi	Basidiomycota	Agaricomycetes	Thelephorales	Thelephoraceae	Thelephora	tomentella-thelephora	emb|LN911994.1	99.08	7.71e-98	97.22
OTU48	1_25799|F|ITS2;size=3083;	LT978686	ACACCTCAACTCTCATGGTTTGCCATGATGAGCTTGGACTCTGGGGGTTTTGCTGGCCTGCGGTCGGCTCCCCTCAAATGGATCAGCCCCCCAGTGTTTGGTGGCATCACGGGTGTGATAACTATCTACGCTCACGATTGCCTGCCGGGTAACCTTTGGCAACAAAGGTTCGCTGGAGCTCACAAACGTCTCTCCTCAGCGGAGACAACTTTTTGAAC	Fungi	Basidiomycota	Agaricomycetes	Thelephorales	Thelephoraceae	Tomentella	tomentella-thelephora	emb|HG425996.1	100	3.04e-82	92.66
OTU49	1_25848|F|ITS2;size=1668;	LT978687	ACACCTCAACTCTCATGGTCCGCCATGATGAGCTTGGACTTTGGGGGTCTTGCTGGCCTATCACCGGCTCCTCTCAAATGAATCAGCTTGCCAGTGTTTGGTGGCATCACGGGTGTGATAACTATCTACGCTTGTGGTTTCCCACCAGGTAACCTCCAGTGATGGGGGTTCACTGAAGCTCACAATCGTCTCTCCTCGGTGGAGACAGCTTTTGAAC	Fungi	Basidiomycota	Agaricomycetes	Thelephorales	Thelephoraceae	Tomentella	tomentella-thelephora	gb|KP753364.1	100	2.24e-78	91.74
OTU50	1_25926|F|ITS2;size=7402;	LT978688	ACACCTCAACTCTTCATGGTTTTTCCATGATGGGCTTGGACTTTGGGGGTCTTGCTGGCCTGTGGTCAGCTCCTCTCAAATGAATCAGCTTTCCAGTGTTTGGCAGCATCACAGGTGTGATAACTATCTACGCTTGTGGTTTTCTGCCAGGTAATCCTCAGCAATGGGGATTCGCTGGGGCTCATAAATGTCTCTCCTCAGTGAAGACAGCTTTGTGAAC	Fungi	Basidiomycota	Agaricomycetes	Thelephorales	Thelephoraceae	Tomentella	tomentella-thelephora	emb|AJ879644.1	100	7.84e-98	96.82
OTU51	1_25949|F|ITS2;size=8466;	LT978689	ACACCTCAACTCTCATGGCTTGCCATGATGAGCTTGGACTTTGGGGGTCTTGCTGGCCTGTAGACAGCTCCTCTCAAAAGTATTAGCTTGCCGGTGTTTGGTGGCATCACAGGTGTGATAACTATCTACACTTGTGGTTTTCCACCAGGTAACCTTCAGCAATGAAGGTTCGCTGGAGCTTACAAAAGTCTCTCCTCAGTGAGGACAGCGATTTGAAC	Fungi	Basidiomycota	Agaricomycetes	Thelephorales	Thelephoraceae	Tomentella	tomentella-thelephora	AB848659	99	3e-93	95.35
OTU52	1_26359|F|ITS2;size=301;	LT978690	ACACCTCAACTCTCGTGGCTTGCCATGATGAGCTTGGACTTTGGGGGACTTGCTGGCCTATGGTCGGCTCCTCTCAAATGGATCAGCTTGCCAGTGTTTGGTGGCATCACAGGTGTGATAACTATCTGCGCTTGTGGTTTGCCATCAGATAACCTTCAGTGATGGAGGTTCTCGCTGGAGCTCATAAACGTCCCTCCTAAGTGAGGACAGCCCCTTGAAC	Fungi	Basidiomycota	Agaricomycetes	Thelephorales	Thelephoraceae	Tomentella	tomentella-thelephora	gb|JX630659.1	100	7.78e-103	98.18
OTU53	1_26507|F|ITS2;size=7441;	LT978691	ACACCTCAACTCTTCATGGTTTTCCATGATGAGCTTGGACTTTGGGGGGTTTTGCCGGCCTATGGGTCAGCTCCCCTAAAATGAATCAGCTTGCCGGTGTTTGGTGGGCATCACAGGTGTGATAACTAATCTACGCTTGTGGTTTTTCCACCGGGTAACCTTCAGCAGTGGAGGTTCGCTGGAGCTCACAGATGTCTCTCCTCAGCGAGGACAGCCCCTTTGAAT	Fungi	Basidiomycota	Agaricomycetes	Thelephorales	Thelephoraceae	Tomentella	tomentella-thelephora	gb|JQ711987.1	100	2.2e-93	95.13
OTU54	1_2899|F|ITS2;size=20686;	LT979771	AATCATCAAAACCCTTCTTCTTTGGAGAAGGATTTTGGACTTGGAGGATTTATGCTCGCTTTCAGCATTGAAAGTGGGCTCCTCTCAAATGAATTAGTGGGGTTTGCTTTGTCGATCCTTGACGTGATAAGATGTTTTTACGTTTTTGATTTGGCATCGTGCCCGCTTCCAACCGTCCTCGTGGACGACGATGGTGCTTTGGTCACCGCCATGCGCGGGAGGCTGGACCCACAATAAA	Fungi	Basidiomycota	Agaricomycetes	Russulales	Russulaceae	Russula	russula-lactarius	gb|JQ991819.1	100	2.12e-118	99.58
OTU55	1_33|F|ITS2;size=218;	LT981168	CAACCACTCAGGCCTATGAAGCCTGGCGTTGGGGCATCTACAGTTGATTGTAGGCCTTAAAAGAGAGTGGCGGTATCCGCTAGCATTCCGGGCGCAGTACAGTTCCTTCTCGCCCAGGACGTCTTAGGGGCTGCCGGCCGTAAAACAGCCTAAAGCTTAGAA	Fungi	Ascomycota	Sordariomycetes	Sordariales	_	_	sordariales1	GQ268552	100	3e-57	91.41
OTU56	1_4015|F|ITS2;size=27214;	LT980345	AGCTCTCAACTACAACTAGATTTATTCTAGCTGTAGCTTGGATGTGGGGGTTATCTTTGCAGGCTTCAGATATAATTGAAGTCGGCTCCCCTAAAATGTATTAGTGGTCTCTGAGCAGAGAAAACGGTGTGATAATTATCTATGCCTTAGTACTTTGCATGAACTGCTTCATAATCTTATGATAATGTTTGACAA	Fungi	Basidiomycota	Agaricomycetes	Agaricales	Inocybaceae	Inocybe	inocybe	gb|GQ892988.1	88.21	8.58e-73	96
OTU57	1_4101|F|ITS2;size=96378;	LT978692	ACACCTCAACTCCTCATGGCTTGCCATGATGAGCTTGGACTTTGGGGGACTTGCTGGCCTGCAGTCAGCTCCTCTCAAATGAATCAGCTTGCCAGTATTTGGTGGCACCACAGGTGTGATAAACATCTACTCTTGTGGTCCTCCACCATGTAACCTTCAGTGATGGAGGTTTGCTGGAGCTCACAAATGTCTTTCCTCAGCGAAGACAGCTCTTGATT	Fungi	Basidiomycota	Agaricomycetes	Thelephorales	Thelephoraceae	Tomentella	tomentella-thelephora	emb|FR852174.1	100	1.32e-90	94.98
OTU58	10_229531|F|ITS2;size=7716;	LT978693	ACACCTCAACTCTCATGGTTTGCCATGATGAGCTTGGACTTTGGGGGTCTTGCTGGCCTATGGTCGGCTCCTCTCAAATGAATCAGCTTACCAGTGTTTGGTGGCGTCACAGGTGTGATAACTATCTACGCTTGTGGCTTTCCATCAGGTAACCTTCAGTGATGGAGGTTTGCTGGGGGCTCATAAATGTCTCTCCTCGGTGAGGACAGCTTTTTGAAC	Fungi	Basidiomycota	Agaricomycetes	Thelephorales	Thelephoraceae	Tomentella	tomentella-thelephora	gb|JX474820.1	100	7.78e-103	98.18
OTU59	10_231190|F|ITS2;size=162150;	LT980224	AAACCTCAACCTCCTTGGTTTCTTCTTGGAGACCAAAGCAGGCTTGGACTTTGGAGGCCATTGCTGGTGCCTCGCTTTTGAAGGCCAGCTCCTCTTAAACAAATTAGCAGGGTCCTCTTTGCTGATCCTCGACGTGTGATAAGATGTTTCCATGTCTTGGCTTCTGGCTCTGTCACCTTTTGGTTGGGACCTGCTTCTAACCGTCTTTGTGAAGACAAAGTTCGAGCATGTCTCCCTTCTCGGGAAGCTCCCTCGACCCCACGAAC	Fungi	Basidiomycota	Agaricomycetes	Russulales	Russulaceae	Lactarius	russula-lactarius	gb|KR090971.1	100	8.28e-98	91.4
OTU60	10_233008|F|ITS2;size=258;	LT981219	TAACCCCTCAAGCTCGGCTTGGTGTTGGGGCCTGCCGCACGGGCAGCCCTTAAAATCAGTGGCGGTGCCATCTGGCTCTAAGCGTAGTAATTCTTCTCGCTATAGAGTCCCGGTGGATGCTTGCCATTAACCCCCAATTTCAAT	Fungi	Ascomycota	Leotiomycetes	Helotiales	_	_	helotiales1	KF850382	100	1e-70	100
OTU61	10_233673|F|ITS2;size=1244;	LT980225	AAATCTCAACCTCCTTGGTTTCTTCTGGAGACCAAAGGAGGCTTGGACTTTGGAGGCCTTTGCTGGCATCTCTCTCTTTTGAAGGCCAGCTCCTCTTGAATGAATTAGCGGGGTCCTCTTTGCCGATCCTTGACATGTGATAAGATGTTTCCATGTCTTGTTTCCTGGCTCTGTTGCTTTTGGGACCTGCTTCTAACCGTCTCAACCTTGCATCGAGACAATGTTCGAGCCTGTCTCCCTTCTCGGGAAACCCTCTCGACCCCACGAACC	Fungi	Basidiomycota	Agaricomycetes	Russulales	Russulaceae	Lactarius	russula-lactarius	FM992936	100	5e-117	94.81
OTU62	10_235779|F|ITS2;size=385;	LT981169	CAACCCTCAGGCCCTTGGGAGCCTGGTGTTGGGGCACCTGCATGACCGCAGGCCCTAAAAGATAGTGGCGGTGTCCGCTAGCACTCCGGGCGCAGTAGATCTCTTCCTCGCCTAGGACGTCTTGCGGGCTGCCGGCCGTAAAACACCCCCCTATAATACAA	Fungi	Ascomycota	Sordariomycetes	Sordariales	_	_	sordariales1	UDB004070	100	2e-74	98.14
OTU63	10_237714|F|ITS2;size=527;	LT978694	ACACCTCAACTCTTCATGGTTTTCTGTGATGAGCTTGGACTTTGGGGGTTTTGCTGGCCTGCGGGTCGGCTCCTCTAAAATGAATCAGCTTGCCAGTGTTTGGTGGGCATCACAGGTGTGATAACTATCTACGCTTGTGGTTTTCCACCAGGTAACCTTCAGCAGTGGAGGTTCGCTGGAGCTCACAGATGTCTCTCCTCAGTGAGGACAACCCTTTGAAT	Fungi	Basidiomycota	Agaricomycetes	Thelephorales	Thelephoraceae	Tomentella	tomentella-thelephora	AF430259	100	2e-106	98.2
OTU64	101_2132774|F|ITS2;size=158;	LT979479	GTACTCTCACACTCTCTGATCCTTTGGATTTGGGGAGCGGTGGACTTGGGTGCTTGCTGCTTCCTTGTGGCTCACCTGAAATGCGTCAGTGCATCTCTTGATTGGACATAGTACGGCGTGATAAGTGTCTTCGCCGGCACCTCGTAAGAGGGTGGCTGATCGGGAGCTCTGTGCTCCAAACCGTCCTTGGACAATGACTGACA	Fungi	Basidiomycota	Agaricomycetes	Sebacinales	Sebacinaceae	Sebacina	sebacina	HG796959	100	7e-90	96.08
OTU65	102_2144741|F|ITS2;size=527;	LT980196	AATTCTCAACCATTCTTTGATCGATTTCGAGGAATGGCTTGGATCTTGGGAGTTGCCGGCCCCCTCGTGGGGTCGACTCTCCTTAAAAGCATTAGCGAAAGGTGGCAAGCCCCCCTGCATGCACGGCCTTCGACGTGATAATGATCGTCGTGGCTGGAGTGCGATCGGGTTTAGTCCGTCCTTTGCTTCTAAACGGGATGGTAATCGGGGGGACTTTGCTTCGGCTCAGGAACCTTATTACTTCTTTGAC	Fungi	Basidiomycota	Agaricomycetes	Boletales	Melanogastraceae	Melanogaster	paxillus-gyrodon	emb|AJ555517.1	64.4	3.31e-51	90.36
OTU66	102_2147452|F|ITS2;size=10;	LT979480	TACTCTCACACTCCCAATGCTTTTGGATTGGGAGCGGTGGACTTGGGTGTTGCTGCTTTACTGTGGCTCGCCTCAAATGAAGTAGTGCAACTTGCGGTTGGACATAGTACGGCGTGATAAGTATCTTCGCCGGCGCCTCACTAGAGGGTGGCCGATCGGGAGCTCTGTGCTTCCAACCGTCTTCGGACAATCTCTGACA	Fungi	Basidiomycota	Agaricomycetes	Sebacinales	Sebacinaceae	Sebacina	sebacina	gb|KC840634.1	100	1.01e-86	96.48
OTU67	103_2160185|F|ITS2;size=602;	LT979772	AATCATCAAAACCTTTTCCTCTTTGATCCCAAATTTATTTGGGTTGGGAAAAGGATTTTGGACTTGGAGGTTCCATGCTCGCCTTCTTTTGAAAGCGAGCTCCTCTCAAATGAATCAGTGGGGTCCGCTTTGCCGATCCTTGACGTGATAAGATGCTTCTACGTTTTGGGTTTGGCACCGTCCCTTGGACGCCTGCTCCTAACCGTCCCCATGGACAACGATGGTGCTCCGGTCGACCGCCGTCTACGTTGGCGGGGGAAGGCTGGACCCACGAAAAGAAAA	Fungi	Basidiomycota	Agaricomycetes	Russulales	Russulaceae	Russula	russula-lactarius	JX425382	99	4e-133	97.15
OTU68	103_2160488|F|ITS2;size=10340;	LT979481	TACTCTCACACCCTCCGATCCTTTGGATTTGGGGAGTGGTGGACTTGGGTGCTTGCTGCTTTTGTTGTGGCTCACCTTAAATGTGTCAGTGCATCTCTTGATTGGACATAGTACGGCGTGATAAGTGTCTTCGCCGGCACCTCATAAGAGGGTGGCCGATCGGGAGCTCTGTGCTTTCAAACCGTCTTCGGACAATCTCTGACA	Fungi	Basidiomycota	Agaricomycetes	Sebacinales	Sebacinaceae	Sebacina	sebacina	AB848606	100	1e-91	96.57
OTU69	103_2163630|F|ITS2;size=7140;	LT980964	AATCCTCAAAACCCTTTTTCTCTTTGAAAGGATTTTGGACTTTGGAGGTTTGATGCTCGCCTTTTGCTTTCAAAAGCGAGCTCCTCTCAAATGAATTAGTGGGGTTTGCTTTGCCGATCCTTGACGTGATAAGATGCTTCTACGTTTTTGGATTTGGCACCGATGCCCGCTTCTAACCGTCCGTCTCACGGACGTTGATGGTGCTCTGGTCATCGCCAATCTACATTGGCGGGAGGCTGGACCCACGAAACGAAA	Fungi	Basidiomycota	Agaricomycetes	Russulales	Russulaceae	_	russula-lactarius	JX030251	98	5e-77	88.05
OTU70	103_2164011|F|ITS2;size=390;	LT980346	AATTCTCAACCGCACCTGGTGTGGCTTGGATTTGGGTTGTTGCAGGCCTGTGTAGTCTGCTCCCCTGAAATTGATTAGCAGTACCTTGGTGGAACTGTCTCTACAGGTGTGATAATTATCTACATCCTGGACATCTGCTTAATGCTGCTTTCTAAACCTCATCTGTATTGACCA	Fungi	Basidiomycota	Agaricomycetes	Agaricales	Inocybaceae	Inocybe	inocybe	gb|KR149760.1	100	1.44e-70	95.4
OTU71	103_2164439|F|ITS2;size=11;	LT979773	AATCCTCAAAACCTCTTTTGCCCTTTGATTGGGGAAAGGCTTTTGGACTTGGAGGATCAATGCTCGCCCTTACTTTTTTGAAGGCGAGCTCCTCTCAAATAAATTAGTGGGGGTTTGCTTTGCTGATCCTTGACGGTGATAAGACATCTCTACGTTTTGGATTTGGTGACTGTCCCTTGCTTCTAACCGTCCTATGGACAATGATGGGTGCACCGGTCACCACCTTATATCGGTGGGAGGCTGGACCCACAAAAAAGGA	Fungi	Basidiomycota	Agaricomycetes	Russulales	Russulaceae	Russula	russula-lactarius	AB509929	100	2e-116	96.14
OTU72	104_2170217|F|ITS2;size=2090;	LT979774	ACACCCTCAACCTTCTTGGTTTCTTGACTAGGAAGGCTTGGACTCTGGAGGTTTTCCTTGCTGGCCTCTTTTTGAAGCCAGCTCCTCCTAAATGAATTAGTGGGGTTCGCTTTGCCGATCCTTGACGTGATAAGTATGCTTCTACGTCTTGGGTTTTGCACTGTCCCACTTCCAATGGTCTTTGAATGAAGACAATGTAAGAGTTGCATCGCGATTCTTACTCAGCGA	Fungi	Basidiomycota	Agaricomycetes	Russulales	Russulaceae	Russula	russula-lactarius	UDB014226	100	5e-107	97.37
OTU73	104_2179452|F|ITS2;size=5570;	LT981208	AACCCACTCAAGGGGGGATTTTTCGAAACCCCAGCTTGGTCTTGGGCCTGAGGGATCAGAACCCTCTGCCTGCAATCCAGTGGCGGATTTTCCAGCGCGGCATCAGCGTGATGAACACGTCGTTCGCGAATGGCGGCGGGAAAGTCCAGCCATGACAAAACCCTCAAATAAATTTTCAA	Fungi	Ascomycota	Pezizomycetes	Pezizales	_	_	tarzetta	EF559302	88	1e-37	84.81
OTU74	104_2185567|F|ITS2;size=2810;	LT979775	CATTCTCAAAACCTTCTTGGTTTCTTGACCGGGAAGGCTTTGGACTTTGGAGGCTTTTGCTGGCATTCCCTTGTTGAAGCCAGCTCCTCTGAAATGAATTAGTGGGGTCTGCTTTGCCAATCCCTGACGTGATAAGATATTTCTACGTCTTGGGTTTCGCATCCGCATCCCGCTTCTAACCGTCTCATTAGAAGACAATGGCCGAGTGATTGCCACTCGACCCACGAA	Fungi	Basidiomycota	Agaricomycetes	Russulales	Russulaceae	Russula	russula-lactarius	KF850404	100	4e-117	100
OTU75	105_2186516|F|ITS2;size=112;	LT979482	GTACTCTCACACTTTGGATCCTTTGGATTTGGAGCGGTGGACTTGGGTGTTGCTGCTTTGCGGCGGCTCACCCCAAATGCATGCGTGCAACTCCTGGTTGGACATAGTACGGCGTGATAAGTGTCTTCGCCGGCACCTCATTAGAGGGTGGCCGATCGGGAGCTCTGTGCTTTCCAACCGTCTTCGGACACTGTTTGACA	Fungi	Basidiomycota	Agaricomycetes	Sebacinales	Sebacinaceae	Sebacina	sebacina	gb|JF273541.1	100	2.85e-77	93.5
OTU76	105_2186726|F|ITS2;size=123;	LT979483	GTACTCTCACACTCTCTACTCCTTTGGGTTTGGGGAGCGGTGGACTTGGGTGCTTGCTGCTTTCCTTGTGGCTCACCTCAAATGCGTCAGTGCATCTCTTGATTGGACATAGTACGGCGTGATAAGTGTCTTCGCCGGCACCTCGCGAGAGGGTGGCTGATCGGGAGCTCTGTGCTTTCGAACCGTCCTTGGTGGACAATGACTGACA	Fungi	Basidiomycota	Agaricomycetes	Sebacinales	Sebacinaceae	Sebacina	sebacina	emb|LN910006.1	99.52	2.2e-78	93.24
OTU77	105_2187349|F|ITS2;size=22;	LT978594	TTTATTCTCAACCCATGTCTTGATTGAGTTCAAGGAATGGCTTGGAGTTGGAAGTTGCTGGCGATCGATAGAATAAGTCAGCTCTTCTGAAATTGATTAGCGATCAGGACAAGCAGCATTGTTCTGACGTGCACGGCCTTGCGACGTGATAATGAATGTATCGGTCGTGGCTGGAGCGTTGGTCATTGCATTTAACATTTTGTCTTTGATTCGCTTCCAATCCTAATCCTAATCATTATCATTCATTTGATTGATTGATTGATTGATTTCGAAC	Fungi	Basidiomycota	Agaricomycetes	Boletales	Boletaceae	Tylopilus	boletus	AB509871	98	3e-139	100
OTU78	105_2189712|F|ITS2;size=936;	LT980226	ATACCCTTCAACCTTTCTTGGTTTCTTTTGGAGACCAAAGGAGGCTTGGACTTTGGAGGCGTTTGCTGGGACCTTCAAAGGCCAGCTCCTCTTAAATGTATTAGCGGGGTCCTCTTTGCCGGTCCTTGACATGTGATAAGATGCTTCCGTGTCTCGGTTCCTGGCTCTGTTGCCTTTGGGACCCGCTTCTAAACCGTCTAGACCCAGGTCGAGACAATGTTTGAGGAAACCTCCTCGACCCCACGAAC	Fungi	Basidiomycota	Agaricomycetes	Russulales	Russulaceae	Lactarius	russula-lactarius	gb|KT165293.1	87.9	2.92e-72	90
OTU79	105_2201606|F|ITS2;size=18;	LT979484	GTACTCTCACACCCCCGATCCTTTGGATTTAGGGGGCGGTGGACTTGGGTGTTTGCTGCTTTCGTGTGGCTCACCTGAAATGTGTTAGTGCATCTCCTGGTTGTACATAGTACGGCGTGATAAGTGTCTTCGCCGGCACCTCGGAAGAGGGTGGCAATCGGGAGCTCTGTGCTTTCAAACCGTCTTCGGACAATCTCTGACA	Fungi	Basidiomycota	Agaricomycetes	Sebacinales	Sebacinaceae	Sebacina	sebacina	FJ803954	100	7e-80	93.17
OTU80	105_2201901|F|ITS2;size=9;	LT979776	AAATCTCAACCTCCTTGGTTTCTCAACCAAGGAAGGCTTGGACTTTGGGGGTTATTGCTGGCCTCAGTCGAAGCCAGCTCCTCCTAAATGGATTAGTGGGGTCCACTTTGCTGATCCTTGACGTGATAAGATGTTTCTACGTCTTTGGTTTCGCACTGTTGCTTTGGACTCTGCTTCTAACCGTCTTACATTCAAGACAGAGTTTATGAA	Fungi	Basidiomycota	Agaricomycetes	Russulales	Russulaceae	Russula	russula-lactarius	HE814111	98	5e-96	97.57
OTU81	105_2204028|F|ITS2;size=512;	LT979777	ATACTTTCAACCTTCTTGGTTTGTTTTGACCAGGAAGGCTTGGACTTTGGAGGTTTTTCTTGCTGGTCTCTTTTGAAGCCAGCTCCTCCTAAATGAATGTGTGGGGTCCGGTTTGCTGATCCTTGACGTGATAAGCATATTTTCTATGTCTCTCAGCTCGGAACCTGCTTTCCAACTGTGTTTGAGTTGTGACTCAACCTTTATACAAA	Fungi	Basidiomycota	Agaricomycetes	Russulales	Russulaceae	Russula	russula-lactarius	AF418609	88	6e-66	91.35
OTU82	106_2210839|F|ITS2;size=2631;	LT980453	AATTCTCAACCTTATCAGTTTATTTCTGATAGTGGCTTGGATGTGGGGGTTTCTCTTGCTGGCTCAGGTCAGCTCCCCTTAAATGCATTAGCTGGTGCCCCGTGTGGACTGTCTATTGGTGTGATAATTATCTACGCCATGCATGGATGTCTGCTTAGCACTGCTTCTAACCGTCTTGGACAATATATGACA	Fungi	Basidiomycota	Agaricomycetes	Agaricales	Hebelomataceae	Hymenogaster	hebeloma-alnicola	JX030221	100	2e-90	97.93
OTU83	106_2211137|F|ITS2;size=178;	LT978560	TTACTCTCAACCATGTCTTCGATTCATTTCGAGGCATGGCTTGGATTTGGGAGCTTGCCGGCCTTGTGGTCGACTCTCCTTAAATGCATTAGCGAATGGGACGCGTCAGTGGGTCCGGCGGGCAATCGATAGCCTTTCGACGTGATAAAGATCATATATCGGAGTCGAGGCTCGCGCGTCGGGTGTAAGACATGTTCTCTTTTTGCTTCCAATCCCCAACCTGCTTTAGCTAGTAGTCGGTCGATCGACCTTCGAACGCAAAGAGCAGACCATCGACCA	Fungi	Basidiomycota	Agaricomycetes	Boletales	Boletaceae	Xerocomus	boletus	AB509640	100	3e-145	100
OTU84	106_2212050|F|ITS2;size=99;	LT980454	AATTCTCAACCTTATCAGTTTATTTCTGATAGTGGCTTGGATGGTGGGGGTGCTGGCTCCTTTATTGAGGTCAGCTCCCCTTAAATGCATTAGCTGGTGCCCTGTGTGGACTTGTCTATTGGTGTGATAATTATCTACGCTATGGATGTCTTACTTAGCACTGCTTCTAACGGTCTGTTAATTCGGACAATACATGACA	Fungi	Basidiomycota	Agaricomycetes	Agaricales	Hebelomataceae	Hymenogaster	hebeloma-alnicola	HQ541857	100	9e-94	97.99
OTU85	106_2223059|F|ITS2;size=4;	LT981105	AATTTCTCAAGCTTGGATGGCAGTTTTGTCTGTCCTTAGTCTTGGTTTATTGGGCTTTTGCTGTTTCTTTCATTGAGACGGCTGGCCTTAAAAGTATTAGCTGATCCTTATGTTGGTACTGGTTCTACTCAGTGTGATAATAATATGATCACTGAGGACATCTTTTGGGATGGCCAGTTCTCATTCGGGTTGCTTCTAACCTTGGATGCGGATTTTGTTCAATCTGGTACCAATCATCGA	Fungi	Basidiomycota	Agaricomycetes	Cantharellales	Clavulinaceae	_	clavulina	JQ724058	97	5e-67	86.75
OTU86	106_2226793|F|ITS2;size=10889;	LT980717	AATTTCTCAAGCTTGGATAGCCTTCTCCAGCTGTCCATTAGCCTTGGTTGTTGGGCTTTGCCGTGTCCTTCATTGGAACGGCTGGCCTTAAATGCATTAGCTGATCCTTGTGCGGCACTGGTTTGACTCAGCGTGATAATGGATCTGATCGCTGAGGACATCCTTTTAGGATGGCCAGTCCTCATTTGGGTTGCTTCTAAATCTGGTCTTGCAGGTTCTTGAATCTGCTGTTCCACTTTTCAG	Fungi	Basidiomycota	Agaricomycetes	Cantharellales	Clavulinaceae	Clavulina	clavulina	UDB002683	100	1e-87	90.95
OTU87	107_2230467|F|ITS2;size=1593;	LT980511	CCTCTCTCCAAGCCCCTCAGCTTGGGTGTTGGGCCTGTCGTCCCCCTCCCGTGGCGGGGGTGGGACGGGCCTGAAAGACAACGGCGATGCGATGGTCAGCTCCCGAGCGTATGGGTTCATTCTCCCGCTCTAGGTGTGATCGGCATCTGCCCCTGCCCTGCAGTGCTGACTCC	Fungi	Ascomycota	Eurotiomycetes	Eurotiales	Elaphomycetaceae	Elaphomyces	elaphomyces	emb|LN911013.1	100	2.88e-82	99.42
OTU88	108_2248731|F|ITS2;size=66;	LT980759	AAATTCTCAAAGTAAATCTTTTTGTTAATTCAATTGGTTTACTTTGGATTTGGAGGCTTTGCAGATTTTTACAATCTGCTCCTCTTGAATATATTAGCTGGATCTCAGTATATACTTGGTTCCACTCAGTGTGATAAGTATATCACTCGCTGAGGACACCCATAAAACAGGTGACCAAGGAATATAGATGAACTGCTTCTAATAGTCTATTAGATTAGACAAATTAATTACCATG	Fungi	Basidiomycota	Agaricomycetes	Cantharellales	Ceratobasidiaceae	Ceratobasidium	ceratobasidium1	GQ175295	97	8e-95	94.35
OTU89	108_2248807|F|ITS2;size=87;	LT980874	AACTCTCAAAACGCCCCCAAATTCTTGGGGGTGTTTTGGACTTTGGGAGTGTTTTGCTGGTCTGCTTGAGCCAGCTCTCCTCAAAAGTGTTAGCTCTGGGAGACTGTCAGCGTGATAACTTTGTTTATGCTGAGTCTCTGATGTTGTGTGCCCA	Fungi	Basidiomycota	Agaricomycetes	Agaricales	Amanitaceae	Amanita	amanita	AB015694	100	4e-76	100
OTU90	108_2251742|F|ITS2;size=2;	LT979756	AAACCTCGGATCGACGCTTCGCCCGAAGCTCGGTTCGGACTATGGGAGTCTGCTGGCGAAGCGTGACTTCGTCGGCTCTCCTCAAAAGCATTAGCTGTGGGTGGCGAGCCTGGCATGGCACGGCCTGTTCGACGTCGTAGTGATCGTCGCGGGCTGGAAGTGTACGGCTCGACGTGACCCATGCTTCTCGAGTCTTGCGAGCCCGTCCCTCCGTGGGACGGCCGCGCCCCATCGAA	Fungi	Basidiomycota	Agaricomycetes	Boletales	Sclerodermataceae	Scleroderma	pisolithus-scleroderma	AB509676	100	6e-111	97.1
OTU91	108_2252660|F|ITS2;size=2;	LT980227	AATTCTCAACCTCCTCGGTTTCTTTTGGACGCCAAAGAAGGCTTGGACTTTGGAGGGCTTTGCTGGACTTGAAAGGCCAGCTCCTCTCAAATGAATTAGCGAGGTTCCCTTTGCCGATCCTCGACGTGTGATAAGATGCTTCCACGTCTCGGTCATTGGCTCTGTTGCCTTTCGGGACCTGCTTCCAATCATCTCTTGACGAGACAATGTTTGAGCTCGTCTCGACCACGTAC	Fungi	Basidiomycota	Agaricomycetes	Russulales	Russulaceae	Lactarius	russula-lactarius	AB509850	100	8e-105	96.15
OTU92	108_2253123|F|ITS2;size=621;	LT978695	AATTCTCAACTCTCACGGTTCGCCATGATGAGCTTGGACTTTGGAGGCTTTGCTGGCCTGTGGTCGGCTCCTCTCAAACAAATCAGCTTACCGGTGTACTGGTGGCATCACGGGTGTGATAACTATCTACGCTTGTGGTCGTCTGCCGAATTTTCTGGGGCTCATAAACGTCTCCCGAGTGAAGACAGCCTTCTGAAC	Fungi	Basidiomycota	Agaricomycetes	Thelephorales	Thelephoraceae	Tomentella	tomentella-thelephora	UDB003335	96	3e-63	97.2
OTU93	108_2268337|F|ITS2;size=271;	LT980953	AATTCTCAACCCTATCAGCTTTTGCTGATAGTGGCTTGGATGGTGGGGGTTTCTCCTGCTGGCTCCTGTCAGCTCCCCTTAAATGCATTAGCTGTTGCCCCGTGCGGACTGTCTATTGGTGTGATAATTATCTACGCTGTGGATGTCTGCAATAATAGCATCGCTTCTAACCGTCTGTTCATTCCGACAATAATACATGACA	Fungi	Basidiomycota	Agaricomycetes	Agaricales	Strophariaceae	_	hebeloma-alnicola	JF273526	95	9e-59	88.32
OTU94	109_2271017|F|ITS2;size=87;	LT980512	CCATCCTCAAGCTCCGCTTGGCTGGTTGGGCCGGCGTCCACCGCCTGAAAGGCAGTGGCGGCTCCCGGGGACTCTGGTCCCGGGGGCGGTGATGCATGGGTCTCTTCATCCACCGTCCCACGGGCCGCGCCCCCGGAGTCGGTCGAACGGTCGGTCTTCCCCTGTA	Fungi	Ascomycota	Eurotiomycetes	Eurotiales	Elaphomycetaceae	Elaphomyces	elaphomyces	AB807936	98	2e-55	90.23
OTU95	109_2284712|F|ITS2;size=1209;	LT979778	CATTCTCAAAAACCATCTTGGTTTCTTGACCAGGAAGGCTTTTGGACTTTGGAGGCTTTTTGCTGGCTTTCCTTTGTTGGAGCCAGCTCCTCTGAAATGGATTAGTAGGGTCTGCTTTGCCGATCCTTGACGTGATAAGATGTTTTCTACGTCTCGGGTTCTGCACTCCTGCTTCTAACTGTCTCACAGAAGACAAAACGGTCAAAGTGATTGCCACTTTGACCCACGAA	Fungi	Basidiomycota	Agaricomycetes	Russulales	Russulaceae	Russula	russula-lactarius	dbj|AB848580.1	100	4.65e-105	97.39
OTU96	109_2291658|F|ITS2;size=842;	LT980347	AAAACTTCTCAACCGCTCCAGATTTGCTTCTGGATGTGGCTTGGAAATGGGGGAGTGCAGGCTTTCATTTGAAGGGTCTGCTCCCCTGAAATGTATTAGCTGGCGTCTGAGCAAGACTACCACAGGTGTGATAACTATCAGTGCCTTGGTGTTGTGCTGCTGCTGCTTCCAACCGTGTGCAAAATGACCA	Fungi	Basidiomycota	Agaricomycetes	Agaricales	Inocybaceae	Inocybe	inocybe	KP171108	100	2e-79	94.74
OTU97	11_237884|F|ITS2;size=290;	LT980808	AATTCTCAACTTCACCGATTTGCTTCGAGTGAAGCTTTGGACTTGGAGTGTGCTGGCCCCCCTTTCTGGGGAGGGTCGGCTCCTCTTTAAATGCAGCAGCGGGAGGCATCTTTGACTTTCCGGCATCGGTGTGATAATCGTGTTGCGCCGTTGGGCCGAGGTCTCAGTCCGCTTACAATGGTCTCAGGACGAGGATTGAAAC	Fungi	Basidiomycota	Agaricomycetes	Atheliales	Atheliaceae	Byssocorticium	byssocorticium	UDB013132	100	1e-97	98.52
OTU98	11_238430|F|ITS2;size=2895;	LT980320	AATTTCTCAACCTTTCCAGCTTTTATTAGCTTGGTCAGGCTTGGATGTGGGGGTTGCAGGCTTTATTTATGAGGTCTGCTCTCCTAAAATGCATTAGCGGAACTTTTGTCGACCGTCTATTGGTGTGATAGTTATCTACACCGTGGATGTAAAGCAGTTTTTATAAAGTTCAGCTTCTAACTGTCCATTAACTTGGACAATTTTGACA	Fungi	Basidiomycota	Agaricomycetes	Agaricales	Hydnangiaceae	Laccaria	laccaria	JQ670897	99	3e-83	94.17
OTU99	11_238437|F|ITS2;size=6778;	LT980543	ATATATCAATCTCTTCGGCTTTGCTTGTTGAGTGTTGGATGTGGGGGTTATTGCTGGCCTCTCTTTGAGGTCAGCTCCTCTAAAATATATTAGCGGGACAATTTGTTGATCGTTCATTGGTGTGATAACTATCTACGCTATTGACGTGAGGCAGGTTCAGCTTCTAACGGTCCATTGACTTGGACAAATCTTTCATTA	Fungi	Basidiomycota	Agaricomycetes	Agaricales	Cortinariaceae	Cortinarius	cortinarius	gb|JQ991709.1	100	3.85e-96	99.5
OTU100	11_238457|F|ITS2;size=4653;	LT981088	ATATCTATCAACCTCTGCAAGCTTGTTTTGCTTAATGAGTGTTGGATGTGGGGGGTATTTGCTGGCATGTTATTGATGTCAGCTCCCCTGAAATGTATTAGCAGAACAATTTGTTGACCTTGTTCATTGGTGTGATAATTCATCTACGCTATTGACTGTGAAGCAAAGTTCAGCTTTCTAATGGTCTATTGACTTAGACAATATTTTCATTA	Fungi	Basidiomycota	Agaricomycetes	Agaricales	Cortinariaceae	_	cortinarius	GQ906442	81	4e-48	87.86
OTU101	11_238459|F|ITS2;size=18200;	LT980544	ATATATCAACCCTCTTCTCTTGTTGAGTGGCTTGGATGTGGGGGGTTCTCTTTGCTGGCCTCTCAAGGTTCAGCTCCCCTGAAATGCATTAGCAGAACAACCTGTTTGTTCATTGGTGTGATAACTATCTACGCTATTGAACCTGAGGCAGTTCAGCTCCCCTAACGGTCCTTGGACAATTTATCATCTTA	Fungi	Basidiomycota	Agaricomycetes	Agaricales	Cortinariaceae	Cortinarius	cortinarius	AB848476	92	2e-69	93.79
OTU102	11_238487|F|ITS2;size=195;	LT981089	ATATATATCAACCTCTTCAACCTTTTGGCTTGTTGAGTGTTGGATGATGGGGGCTTGCTGGTTTCTCTCTTTGAAGTCAACTCCCCTGAAATGCATTAGCTGAATAACAATAATAATAATTTGCAGACCTTGTTCATTGGTGTGATAATTATCTATGCTAACTGACAACAAAGCAAGCTCAGCTTCTAATAGTCCATTGATTTGGACAATGTTTATATTAA	Fungi	Basidiomycota	Agaricomycetes	Agaricales	Cortinariaceae	_	cortinarius	KJ792542	98	5e-62	87.96
OTU103	11_238508|F|ITS2;size=2860;	LT980545	ATATATATCAACCTCTTCAGCTTTTGGTTGTTGAGTGCTGGATGTGGGGGCTTTTTTGCTGGTCTTTTTAAAGAGGTCAGCTCCCCTAAAATGTATTAGCGGAACAATTTGTTGACCGTTCATTGGTGTGATAATTATCTACGCTATTGACGTGAGGCAGTTCAGCTTCTAACAGTCCATTGACTTGGACAATTTTCATTA	Fungi	Basidiomycota	Agaricomycetes	Agaricales	Cortinariaceae	Cortinarius	cortinarius	EU821675	99	5e-91	97
OTU104	11_238529|F|ITS2;size=2194;	LT980546	ATATATCAACCTTCTCTTGTTGAGTGGTTTGGATGTGGGGGGTTTTGCTGGCCTCTTTAAAAAGGAGGTTCAGCTCCTCTGAAATGCATTAGCAGAATGAAACCTTGTTCATTGGTGTGATAACCCTATCAGTGCTATTGAACACAAGGGCAAAGTTCAGCTTTCCAACAGTCCTTGGACAATTTATCATTA	Fungi	Basidiomycota	Agaricomycetes	Agaricales	Cortinariaceae	Cortinarius	cortinarius	UDB014198	100	1e-86	96.88
OTU105	11_238597|F|ITS2;size=2999;	LT980497	AATTCTCAACCATTATCAACTTTTGTTGATAATGGCTTGGATGTGGGGGTTATTTTGCTGGCTTCTCAGATAGTCAGCTCCCTTTAAATGCATTAGCCGGTGCCCCGCGTGGACTGTCTATTGGTGTGATAATTATCTACGCTATGGACATCTGCAATCATATGGGTTTGCACTGCTTCCAACAGTCTGTTAAAGACAATACATGACA	Fungi	Basidiomycota	Agaricomycetes	Agaricales	Cortinariaceae	Hebeloma	hebeloma-alnicola	gb|KT225477.1	100	4.95e-100	99.04
OTU106	11_238683|F|ITS2;size=10293;	LT980321	AATTCTCAACCTTCCAACTTTTATTAGTTTGGTTAGGCTTGGATGTGGGGGTTGCGGGCTTCATTAACGAGGTCGGCTCTCCTTAAATGCATTAGCGGAACTTTTGTTGACCGTCTATTGGTGTGATAATTATCTACGCCGTGGATGTGAAGCAGTTTTATGAAGTTCAGCTTCTAATCGTCCATTGACTTGGACATTTTTTGACA	Fungi	Basidiomycota	Agaricomycetes	Agaricales	Hydnangiaceae	Laccaria	laccaria	JX504158	100	3e-103	99.51
OTU107	11_238700|F|ITS2;size=6779;	LT981090	ATATATCAACCTCTTCAAGTTTTGGCTTGCTGAGTGGTATGGATGTGGGGGAATTATTTTGCTGGCTTGAGGTCAGCTCCCCTGAAATGCATTGGCAAAACGATTTGCTGTCATTGGTGTGATAACCTATCTACGCTATTGACATTGAAGCAGTTCAGCTTATAACAGTCCATTTACTTGGACAATCTTATTA	Fungi	Basidiomycota	Agaricomycetes	Agaricales	Cortinariaceae	_	cortinarius	AF325564	99	2e-59	88.24
OTU108	11_238724|F|ITS2;size=6666;	LT981038	GAAACTTCTCAGCTGCTTGTAATAGTAGTGGCTTGGGGAAATGGAGGTTTGTGCAGGCTTGAGAAAAGTCTGCTCCTCTGAAATGTATTAGTGGTGTCTGGGCAGACTGCCATTAGGTGTGATAACTATCAATGCCTTGGTGTATGCTGCGATTGCTGCTGCTTTCCAATCTTTTTAATGACCA	Fungi	Basidiomycota	Agaricomycetes	Agaricales	Inocybaceae	_	inocybe	KM576453	67	2e-30	86.4
OTU109	11_238806|F|ITS2;size=1429;	LT980547	ATATATCAACCTCTGCAGCCTTTGCTTGTTGAGTGCTTGGATGTGGGGGCCTTTTTGCTGGTCTTTTAAAAAGGTCAGCTCCCCTAAAATGCATTAGCGGAACAATTTGTTGATCGTTTATTGGTGTGATAATTATCTACGCTATTGACGTGAAGCAGTTCAGCTTCTAATGGTCTATTTAACTTGGACAATTTTTCATTA	Fungi	Basidiomycota	Agaricomycetes	Agaricales	Cortinariaceae	Cortinarius	cortinarius	gb|JQ991692.1	100	3.65e-96	99.01
OTU110	11_238822|F|ITS2;size=2613;	LT980548	ATATATATCAATCCACTTCTTGCTGAAGTGGTTTGGATGTGGGGGTTTTGCTGGCCACTTTTGAAGGGTCAGCTCCCCTGAAACGCATTAGCAGAACCAACCTGTTCATTGGTGTGATAAACTATCTACGCTATTGAAAGGTAAAGGCAGTTCAGCTTTCTAACCGTCCTTGGACAAATCCATCATTT	Fungi	Basidiomycota	Agaricomycetes	Agaricales	Cortinariaceae	Cortinarius	cortinarius	KJ206482	100	3e-68	92.02
OTU111	11_238852|F|ITS2;size=12515;	LT980549	ATATATCAACCTCTTCAAGTTTTGCTTGTTGAGCGTTGGATGTGGGGGTTTCTTTTGCTGGTCTCTCTTTCTGAGGTCGGCTCCCCTAAAATGTATTAGCGGAACAATTTGTTGACCGTTCATTGGTGTGATAGACTATCTACGCTATTGACGTGAAGCAGGTTCAGCTTCTAATAGTCCATTGACTTGGACAAGTTTTCATTA	Fungi	Basidiomycota	Agaricomycetes	Agaricales	Cortinariaceae	Cortinarius	cortinarius	UDB018343	100	4e-92	96.6
OTU112	11_238865|F|ITS2;size=13904;	LT980550	AATATAATATCAGCCCTCTTCTTCTCTTGTCGAGCGGTTTGGATGTGGGGGGTTCTCTTTGCTGGCCTCTTGAGAGGTTCAGCTCCCCTGAAATGCATTAGTGGAACGACCTGTTCAATTGGTGTGATAAGACTATCTACGCTGTTGAACATGAGGTGGTTCAGCTTCCTAACAGTCCTCGGACAAGTTTATCATTCT	Fungi	Basidiomycota	Agaricomycetes	Agaricales	Cortinariaceae	Cortinarius	cortinarius	emb|LN911825.1	100	1.33e-85	96.48
OTU113	11_238912|F|ITS2;size=1033;	LT980551	ATATATCAACCTCTTCAGCTTTTTGTTTGTCGAGTGTTGGATGTGGGGGGTCATTTTTGCTGGTCTTATTTAAAAAGGTCAGCTCCCCTGAAATGCATTAGCGGAACAATTTGTGGAACGTTTATTGGTGTGATAACTATCTACGCTATTGACGTGAAGCAGTTCAGCTTCTAACAGTCCATTGACTTGGACAAGTTTTTATTA	Fungi	Basidiomycota	Agaricomycetes	Agaricales	Cortinariaceae	Cortinarius	cortinarius	AY669558	100	4e-82	93.66
OTU114	111_2317610|F|ITS2;size=355;	LT981072	CCATCCCCTCAAGCTCCGCTTGGCTGGTTGGGCCGGCGTCCACCCACGGCTTTGTGCCCGGGGGGACGGGCCCGAAAGGCAGTGGCGGCTCCCGGAGGGTGGTCCTTTGGGGCGGTGATACATGGGTTGTCGTCTTCCGCCGCTCTGTTGGCCATGCTCCCCGGGGGCCCGTCGAACGATCGGTCTTCCCCCCTTTA	Fungi	Ascomycota	Eurotiomycetes	Eurotiales	Elaphomycetaceae	_	elaphomyces	JQ991720	100	9e-94	98.48
OTU115	111_2318277|F|ITS2;size=4;	LT979779	AATTCTCAAAATCCTTTTCTTTGATCGGAATAGGAATTTTGGACTTGGAGGTTCAATGCTTGCCTTCACCTTTGAAGGCGAGCTCCTCTCAAATGAATTAGTGGGGTCCGCTTTGCTGATTCTTGACGTGATAAGATGTTCTACGTTTTGGATCTGGCACTGTTTTCTCTGCTTCCAATCGTCCCATGGACAACGATGGGGCTTCGGTCGCCGCCGTTTTATGGCGGGAGGCTGGACCCACAAAGAA	Fungi	Basidiomycota	Agaricomycetes	Russulales	Russulaceae	Russula	russula-lactarius	gb|KJ769299.1	100	1.31e-95	92.77
OTU116	111_2325850|F|ITS2;size=5;	LT980348	CATTCTCAACCACACTACTCTTTGTAGTGTGGCTTGGATTATGGGGTTTTTTGCAGGTTTCTTGAAGCCAGCTTCCCTGAAATGCATTAGTGGTATCTGAGCAGACTACAGATGTGATAAATATCTACATCTTTGCTGTAAACAGATTACACTGCTTCAAACAAAAATCATTGTTTTT	Fungi	Basidiomycota	Agaricomycetes	Agaricales	Inocybaceae	Inocybe	inocybe	JF908197	78	3e-43	89.86
OTU117	112_2335465|F|ITS2;size=15;	LT980135	GAGTCTCTCAAATGGGGTTTGTCACTCCTTTGGATTTTTGGGTCTTGCTGTGAAATTCATCTCAGCTTACCTTGAAAGCATTAGCAAAGCATTCTCAAGTCTTTTGTGATGAGGGCGTTCTAATTGGTCAAGTTCTCGCAAACTGGTCTGTGTAGCCAGTGTCAAAGACGTCTTTTTCCATCATCAAAGTGACTTTAAAGTGACGCTAGCTTCCAATCATCCTTATGGGATGGGGCATTGAGCTCCTTCAATGTTTTAT	Fungi	Basidiomycota	Agaricomycetes	Cantharellales	Cantharellaceae	Pseudocraterellus	cantharellus	KM576333	89	7e-96	94.4
OTU118	112_2336615|F|ITS2;size=6;	LT978696	ACACCTCAACTCTCATGGCTTGCCGTGATGAGCTTGGACTTTGGGGGTCTTGCTGGCCTGTGGGCCAGCTCCTCTCAAATGAATTAGCCTCCCAGTGTTTGGTGGCATCACAGGTGTGATAACTATCTACGCTTGTGGTTTTCCACCGGTAACCTTTGGTGACAAAGGTTCGCTGGAGCTCACAGATGTCTCTCCTCAGCGAGGACAGCTTTTTGAAC	Fungi	Basidiomycota	Agaricomycetes	Thelephorales	Thelephoraceae	Tomentella	tomentella-thelephora	gb|KM576657.1	100	8.46e-83	92.76
OTU119	113_2349274|F|ITS2;size=46;	LT981170	CAACCCTCAGGCCCTAGGCGGCCTGGCGTTGGGGCGTCTGCGGTTGGCCGCAGGCCCTGAAAGACAGTGGCGGTGTCCGCTAGCACTCCGGGCGCAGTAGATCTCTTTCTCGCCGAGGACGCCTTGCGGGCTGCCAGCCGTAAAAAACACCCATCTTCGCTGGAA	Fungi	Ascomycota	Sordariomycetes	Sordariales	_	_	sordariales1	emb|LN909653.1	100	9.78e-56	91.52
OTU120	113_2350058|F|ITS2;size=91;	LT978697	ACACCTCAACTCTCATGGTTTTGCCATGATGAGCTTGGACTTTGGGGGTCTTGCCGGCCTATGGTCAGCTCCTCTTAAATGAATCAGCTTGCCAGTGTTTGGTGGCATCGCAGGTGTGATAACTATCTACGCTTGTGGTTTTCCGTCAAGTAACCTTCAGCGATGGAGGTTCACTGGGGCTTATAAAGGCCTCTCCTCAGTGACGATGGCTCCTTTTGAAT	Fungi	Basidiomycota	Agaricomycetes	Thelephorales	Thelephoraceae	Tomentella	tomentella-thelephora	FJ196997	100	2e-101	96.83
OTU121	113_2350083|F|ITS2;size=46;	LT979485	GTACTCTCACACTCCCGATGCATTTGGATCGGGAGCGGTGGACTTGGGTGTTGCTGCTTACCGTGGCTCGCCTCAAATGGAGCAGTGCACCTCTTGGTTGGACATAGTACGGCGTGATAAGTGTCTTCGCCGGCACCTCACAGAGGGTGGCCGATCGGGAGCTCTGTGCTTCAAACCGTCTTCGGACAACAACTGACA	Fungi	Basidiomycota	Agaricomycetes	Sebacinales	Sebacinaceae	Sebacina	sebacina	gb|KJ769302.1	100	7.87e-83	95.5
OTU122	113_2356538|F|ITS2;size=17;	LT978698	ACACCTCAACTCTCATGGTTTGCCATGATGAGCTTGGACTTTGGAGGTCTTGCTGGCCTACGGTCGGCTCCTCTTGAATGAATCAGCTTGCCAGTGTTTGGTGGCGTCACAGGTGTGATAAACATCTATGCTTGTGGTTGTCTGCCATGGAACCTTCAGCGATGGAGGTTTGCTGGAGCTCACAAATGTCTTTCCTTGGTGAAGACAGCTATTTGATT	Fungi	Basidiomycota	Agaricomycetes	Thelephorales	Thelephoraceae	Tomentella	tomentella-thelephora	UDB018459	98	1e-82	92.52
OTU123	113_2358281|F|ITS2;size=2;	LT979486	GTACTCTCACACTTCCGATCGTTTGGATCGGGAGCGGTGGACTTGGGTGTTGCTGCTTTTACTGTGGCTCACCTTAAATGCATTAGTGCACCTTTCGGTTGGACATAGTACGGCGTGATAAGTGTCTTCGCCGGCGCCTCACTTTGGTGAGGGTGGCCGATCGGGAGCTCTGTGCTTCAAACCGTCTTCGGACAACAACTGACA	Fungi	Basidiomycota	Agaricomycetes	Sebacinales	Sebacinaceae	Sebacina	sebacina	emb|FN669250.1	100	2.19e-83	95.1
OTU124	113_2362664|F|ITS2;size=2;	LT978699	ACATCTCAACTCTCATGGCTTGCCATGATGAGCTTGGACTTTGGGGGTCTTGCTGGCCTGTGGTCGGCTCCTCTCAAATGGATCAGCTTACCAGTGTTTGGTGGCATCACAGGTGTGATAACTATCTGCGCTTGTGGTTTTCCATCAGATAACCTTCAGCAATGGAGGTTCGCTGGAGCTTATAAACGTCTCTCCTAAGCGAGGACAGCTCTTTGAAC	Fungi	Basidiomycota	Agaricomycetes	Thelephorales	Thelephoraceae	Tomentella	tomentella-thelephora	gb|EF644158.1	100	5.98e-109	100
OTU125	115_2394292|F|ITS2;size=74;	LT980875	AACTATCAAAACACTTTTCTTGGGTGTTTTGGACTTTGGGAGTACCACGCTGGTCTGTTTCAGCCAGCTCTCCTCAAAAGCATTAGCTTTGGAGACCATCAGTGTGATAATTTGTTTGCACTGACTCGAGTGTCTCAGCTTCTCCTTTTTTCAATGCCC	Fungi	Basidiomycota	Agaricomycetes	Agaricales	Amanitaceae	Amanita	amanita	KP224324	94	1e-61	95.33
OTU126	115_2394382|F|ITS2;size=303;	LT979487	GTACTCTCACACTCTCTGATCCTTTGGCTTTGGGGGGCGGTGGACCTGGGTGCTTGCTGCTTCCTTGTGGCTCACCTGAAATGCATCAGTGCATCTCTTGATTGGACATAGTACGGCGTGATAAGTGTCTTCGCCGGCACCTCGTAAGAGGGTGGCTGATCGGGAGCTCTGTGCTTTCCAACTGTCTTCGGACAATCCCTGACA	Fungi	Basidiomycota	Agaricomycetes	Sebacinales	Sebacinaceae	Sebacina	sebacina	dbj|LC013798.1	100	1.68e-89	96.57
OTU127	115_2402460|F|ITS2;size=106094;	LT980228	AAATCTCAACCTCCTTGGTTTCTTCTAGAGACCGATGGGGGCTTGGACATTGGAGGCCTTTGCTGGTGTCTCTCTTGAAGGCCCAGCTCCTCTTAAATGAATTAGCAGGGTCCTCTTTGCCGATCCTCGACATGTGATAAGATGTTTCCGTGTCTTGGTCTCTGGCTCTGTTGCTTTTGGGACCCGCTTCTAATCGTCTCAACCTTGCATCGAGACAAACGTCTGAGCGTGGCTCCCTTACCTGGGAAACTCTCTCGACCTCACGAAC	Fungi	Basidiomycota	Agaricomycetes	Russulales	Russulaceae	Lactarius	russula-lactarius	AB848537	100	1e-137	99.63
OTU128	115_2408519|F|ITS2;size=2063;	LT978700	ACATCTCAACTCCTCACGGTTTGCCCCGTGACGAGCTTGGACTTTGGGGGTCTTGCCGGCCTGCAGGTCGGCTCCTCTCAAATGAATCAGCTTGCCGGTGTTTGGTGGCGTCACAGGTGTGATAACTATCTACGCTTGTGGTTCTCCGCCAGGTAACCTCCAGCGATGGGGGTTCGCCGGAGCTCACAAACGTCTCTCCTCGGCGAGGACGGCTCTTTGAAC	Fungi	Basidiomycota	Agaricomycetes	Thelephorales	Thelephoraceae	Tomentella	tomentella-thelephora	gb|EU526855.1	100	1.31e-95	95.95
OTU129	116_2413054|F|ITS2;size=72;	LT980349	AAATTCTCAACCACACTGTGGGTGTGGCTTGGATATTGGGGGCATCATTTGCAGGTCTTGAAAAAGAGGTCTGCTCCCCTGAAATGTATTAGCGGTATCTGCTACTACAGGTGTGATAATTTATCTGCGCCTCTAGTATTCAGCAATATGATTACACTGCTTCTAAACACCTCTCGTCTAATGA	Fungi	Basidiomycota	Agaricomycetes	Agaricales	Inocybaceae	Inocybe	inocybe	emb|FR852248.1	83.15	1.9e-54	92.9
OTU130	116_2413367|F|ITS2;size=12980;	LT980350	GAAACCTCTCAACCACCTTCAAGGTGGCTTGGAAATGGGGGATCGTTGCAGGCTTTTTTGAAGTCTGCTCCCCTGAAATGCATTAGTGGTGTCTGGGCTGACTGCCACAGGTGTGATAACTATCAGTGCCTTGGTGGGAGACCTTGCCGCTTCCAATCCTCTGATGACCA	Fungi	Basidiomycota	Agaricomycetes	Agaricales	Inocybaceae	Inocybe	inocybe	gb|KR149755.1	100	3.04e-82	100
OTU131	116_2413506|F|ITS2;size=9382;	LT979488	TACTCTCACACTCTCTAATGCGGTTGTGCATTAGGAAGTGGTGGACTTGGGTGTTGCTGCTTCACGGTGGCTCACCTCAAATGGATTAGTGCAACTCCTGGTTGGACATAGTACGGCGTGATAAGTGTCTTCGCCGGCACCTCTTTCAGAGGGTGGCTGATTGGGAGCTCTGTGCTTCAAACTGTCTTAGGACACTCTCTGACA	Fungi	Basidiomycota	Agaricomycetes	Sebacinales	Sebacinaceae	Sebacina	sebacina	gb|JX625308.1	100	7.98e-73	92.16
OTU132	116_2413550|F|ITS2;size=109;	LT979489	TACTCTCACACTCTCTAATGCGGTTGTGCATTAGGCAGTGGTGGACTTGGGTGTTGCTGCTTCACGGTGGCTCACCTCAAATGGATTAGTGCAACTCCTGGTTGGACATAGTACGGCGTGATAAGTGTCTTCGCCGGCACCTCGTAAGAGGGTGGCTGATCGGGAGCTCTGTGCTTTCAAACCGTCTTCGGACACTCTCTGACA	Fungi	Basidiomycota	Agaricomycetes	Sebacinales	Sebacinaceae	Sebacina	sebacina	gb|KM588812.1	100	7.98e-73	92.16
OTU133	116_2413818|F|ITS2;size=45;	LT978646	AATTCTCAACTGTCCCAGGCTTCGTTGCTTGTGGGTGAAGTTGGACTTGGAGGTGTGCTGGCGCATGAATGGGCTCCCGTGCTCTGCCGTGCTTGTCGGCTCCTCTTGAATGCATGAGCTTTCCAATCCTTGGCAAAGTATCGTCGATGTGATAATTATCTGCATTGTCTGAGAAAGCCTAACAGGGGAAACCTTTGATCACGTCGGGGTGACCCGCGTCTGAAAA	Fungi	Basidiomycota	Agaricomycetes	Thelephorales	Thelephoraceae	Tomentellopsis	tomentellopsis	UDB020323	100	1e-97	95.15
OTU134	116_2413819|F|ITS2;size=12;	LT979490	GTACTCTCACACTCTCTGATCCTTTGGATTGGGGGCGGTGGACTTGGGTGCTGCTGCTTTACGGTGGCTCACCTCAAATGCCTTAGTGCAACTCTTGGTTGGACATAGTACGGCGTGATAAGTATCTTCGCCGGCACCTCGCAAGAGGGTGGCTGATCAGGAGCTCTGTGCTTCCAACTGTCTGTCTTTCAGACAACAACTGACA	Fungi	Basidiomycota	Agaricomycetes	Sebacinales	Sebacinaceae	Sebacina	sebacina	AB506966	100	4e-102	99.51
OTU135	116_2415161|F|ITS2;size=102;	LT980552	ATATATCAACCTTCTCTTGTTGAGTGGTTTGGATGTGGGGGTTTGCTGGCCTTCTAAAAGGTTTTCAGCTCCCCTGAAATGCATTAGCGGAAACAACCCTGTTCATTGGTGTGATAAACTATCTACGCTACTGAATGTGAAGGGGCAGTTTGGCTTTCTAACGGTCCTCGGACAGCTCATCATTAA	Fungi	Basidiomycota	Agaricomycetes	Agaricales	Cortinariaceae	Cortinarius	cortinarius	UDB002161	100	1e-77	95.19
OTU136	116_2419864|F|ITS2;size=3;	LT979491	TACTCTCACACTCTCTAATGCGGTTGTGCATTAGGCAGTGGTGGACTTGGGTGTTGCTGCTTCACGGTGGCTCACCTCAAATGGATTAGTGCAACTCCTGGTTGGACATAGTACGGCGTGATAAGTATCTTCGCCGGCACCTCGCAAGAGGGTGGCTGATCAGGAGCTCTGTGCTTCCAACTGTCTGTCTTTCAGACAACAACTGACA	Fungi	Basidiomycota	Agaricomycetes	Sebacinales	Sebacinaceae	Sebacina	sebacina	UDB004912	100	7e-80	92.82
OTU137	116_2420939|F|ITS2;size=290;	LT978701	ACACCTCAACTCTCACGGTCTTCCGTGACGAGCTTGGACTTTGGGGGTTTGCTGGCCCTGCGGCCGGCTCCTCTCAAACAAATCAGCTTGCCAGTGTTTGGCGGCATCTCACGGGTGTGATAACTATCTACGCTCGCGGTTGTCTGCCAGGTAACCCTCAGCAATGAAGGTTCATTGGGGCTCATAAACGTCTCTCCTCGGCGAGGACAGCTTTTGAAC	Fungi	Basidiomycota	Agaricomycetes	Thelephorales	Thelephoraceae	Tomentella	tomentella-thelephora	AF272913	100	9e-109	99.09
OTU138	116_2421314|F|ITS2;size=2;	LT979492	GTACTCTCACACTCTCTGATCCTTTGGATTGGGGAGCGGTGGACTTGGGTGCTTGCTGCTTCCTTGTGGCTCACCTGAAATGCGTCAGTGCATCTCTTGATTGGACATAGTACGGCGTGATAAGTGTCTTCGCCGGCACCTCGTAAGAGGGTGGCTGATCAGGAGCTCTGTGCTTCCAACTGTCTGTCTTTCAGACAACAACTGACA	Fungi	Basidiomycota	Agaricomycetes	Sebacinales	Sebacinaceae	Sebacina	sebacina	dbj|LC013798.1	89.37	7.87e-83	97.33
OTU139	116_2424558|F|ITS2;size=656;	LT979493	GTACTCTCACACTTCTGATCCTTTGGATTGGGAGCGGTGGACTTGGGTGCTGCTGCTTACCGGTGGCTCACCTCAAATGCATTAGTGCACCTCTTGGTTGGACATAGTACGGCGTGATAAGTGTCTTCGCCGGCACCTCTTGCGAGGGTGGCTGATCAGGAGCTCTGTGCTTCCAACCCGTCTGTCTTTCAGACAACAACTGACA	Fungi	Basidiomycota	Agaricomycetes	Sebacinales	Sebacinaceae	Sebacina	sebacina	AB848601	100	2e-89	96.1
OTU140	116_2424788|F|ITS2;size=2155;	LT980351	GAAACCTCTCAACCACCTTCAAAGGTGGCTTGGAAATGGGGGACCGTTGCAGGCTTTTGAAGTCTGCTCCCCTGAAATGCATTAGTGGTGTCTGGGCTGACTGCCACAGGTGTGATAACTATCAGTGCCTTGGTGGGAAACCCTGCTGCTTCCGAATCTCTGATGACCA	Fungi	Basidiomycota	Agaricomycetes	Agaricales	Inocybaceae	Inocybe	inocybe	HE814153	100	2e-79	98.22
OTU141	117_2429826|F|ITS2;size=11834;	LT980121	AATTCTCAACTACCTTTTTAACATTTTATGTGTTAAGGGTGAAGTTGGAGTTGGAGGATAATTGCTGGCGCAACTGTCTCTAAGGTTGCTTGTTGGCTCCTCTTGAATGGATGAGTTTTTCTAATGGATCATAGCTCAGTAACACTAATGTGATAATTATCTACGTTAGATGTGAAAGCTTATGAGTAGAGCAGACTTTGAAAGCTCCTATAGAAAAGAATATTGAGGGATAACAAACCCTTAACTTTGACAA	Fungi	Basidiomycota	Agaricomycetes	Thelephorales	Thelephoraceae	Pseudotomentella	pseudotomentella	EU563488	100	4e-113	95.42
OTU142	117_2435709|F|ITS2;size=25061;	LT978702	ACACCTCAACTCTCACGGTTTTACCGTGATGAGCTTGGACTTTGGGGGTCTTGCTGGCCGGCGGTCGGCTCCTCTCAAATGAATCAGCTTACCAGTGTTTGGTGGCATCACAGGTGTGATAACTATCTACGCTTGTGGTTTCCTGCCAGGTATCCTTCAGTGATGAAGGGTCGCTGGAGCTCATAAATGTCTCTCCCCAGTGAGGACGACTTCTTGAAT	Fungi	Basidiomycota	Agaricomycetes	Thelephorales	Thelephoraceae	Tomentella	tomentella-thelephora	emb|LN911388.1	100	3.53e-106	99.09
OTU143	117_2438256|F|ITS2;size=1321;	LT979780	CATTCTCAAAAAGAACCCTTCTTGGTCTTGCGATCGGGAAAGGCCTCTTTTTGGACTTTGGAGGCTATTGCTGGTCCCCCCTTGATAGCCAGCTCCTCTTAAATGAATTAGTAGGGACCACTTTGCCGACCCTAGACGTGATAAGATGTTTCTGCGTCTTGGGTAGTCGCTCTGTCCTTTGGAAACCTGCTTCTAACAGTCTTGTCAAAAGACAGCGTTCGAGCCTTTCTCGTTGATCGGGCAAGGCTTGACACTTTATGAA	Fungi	Basidiomycota	Agaricomycetes	Russulales	Russulaceae	Russula	russula-lactarius	KJ778757	96	5e-127	99.21
OTU144	117_2455098|F|ITS2;size=5026;	LT978703	ACACCTCAACTCCTCATGGTCTTCTATGATGAGCTTGGACTTTGGGGGCTTGCTGGCCCATTTGGTCAGCTCCTCTCAAATGAATCAGCCTACCAGTGTTTGGTGGCACCACAGGTGTGATAACAATCTACGCTTGAGGTTTTCCACCAGGCAACCTTCAGTAATTGGGGTTCACTGGGGCTCACAAATGTCTTTCTTCAGTGAGGACAGCTCTTTGAAT	Fungi	Basidiomycota	Agaricomycetes	Thelephorales	Thelephoraceae	Tomentella	tomentella-thelephora	gb|JX625359.1	100	1.01e-101	97.73
OTU145	118_2459681|F|ITS2;size=53;	LT978704	ACACCTCAACTCTCATGGCTTGCCATGATGAGCTTGGACTATGGGGGTCTTGCTGGCCTGTGGTCAGCTCCTCTCAAATGAATCAGCTTGCCAGTGTTTGGTTGGCGATCACAGGTGTGATAACTATCTACGCTTGTGGTTTTCCACCAGGTAACCTTCAGCGATGGAGGTTCGCTGGGGCTCATAAACGTCTCTCCTCAACGAGGACAGATTTTGACC	Fungi	Basidiomycota	Agaricomycetes	Thelephorales	Thelephoraceae	Tomentella	tomentella-thelephora	gb|KM576648.1	99.09	4.75e-90	94.98
OTU146	118_2460069|F|ITS2;size=6;	LT979781	AATCATCAAAACCTTTTCCTCTTTGATCCCAAATTTATTTTGGTTGGGAAAAGGATTTTGGACTTGGAGGGTTCCATGCTTGCTTTCTTTTGAAAGCGAGCTCCTCTCAAATGAATCAGTGGGGTCCGCTTTGCCGATCCTTGACGTGATAAGATGCTTCTACGTTTTGGATTTGGCACTGTCCCTTGGATGCCTGCTCCTAACTGTCCCCATGGACGATGATGGTGCTCCGGTCGACCGCCGTCTACGTTGGCGGGGGGAGGCTGGACCCACGAAAAGAAAA	Fungi	Basidiomycota	Agaricomycetes	Russulales	Russulaceae	Russula	russula-lactarius	JX425382	99	9e-135	97.52
OTU147	118_2460683|F|ITS2;size=3;	LT978705	ACACCTCAACTCTCATGGCTTGCCATGACGAGCTTGGACTTTGGGGGTCTTGCTGGCCTTTGGTCGGCTCCTCTCAAATGAATTAGCTTTCCAGTGTCTGGCAGCATCACAAGTGTGATAAATATCTACGCTTGTGGTTTCCTGCTGGGTAACCTTCAGCGATGGGGGTTCGCTGGGGCTCATAAATGTCTCTCCTCAGCGAAGACAGTTTTGTGAAC	Fungi	Basidiomycota	Agaricomycetes	Thelephorales	Thelephoraceae	Tomentella	tomentella-thelephora	dbj|LC013833.1	100	1.4e-90	94.98
OTU148	118_2462143|F|ITS2;size=28;	LT979494	GTACTCTCACACTCTCTGATCCTTTGGATTGGGGAGCGGTGGACTTGGGTGCTTGCTGCTTCCTTGTGGCTCACCTGAAATGCGTCAGTGCATCTCTTGATTGGACATAGTACGGCGTGATAAGTATCTTCGCCGGCACCTCTTGCGAGGGTGGCTGATCAGGGGCTCTGTGCTCCCAACCGTCTTTCAGACAACCACTGACA	Fungi	Basidiomycota	Agaricomycetes	Sebacinales	Sebacinaceae	Sebacina	sebacina	FR852338	100	3e-78	92.68
OTU149	118_2466087|F|ITS2;size=25;	LT979495	GTACTCTCACACTTCTGATCCTTTGGATTGGGAGCGGTGGACTTGGGTGCTGCTGCTTTTCCGGTGGCTCACCTCAAATGCCTTAGTGCAACTCTTGGTTGGACATAGTACGGCGTGATAAGTGTCTTCGCCGGCACCTCGTAAGAGGGTGGCTGATCGGGAGCTCTGTGCTTTCAAACCGTCTTCGGACACTCTCTGACA	Fungi	Basidiomycota	Agaricomycetes	Sebacinales	Sebacinaceae	Sebacina	sebacina	emb|LN912152.1	99.5	2.2e-78	93.63
OTU150	118_2471708|F|ITS2;size=13889;	LT978706	ACACCTCAACCCCCTCGTGGTTTGCCACGATCGGTTTGGACTTTGGAGGTTTTGCTGGCCCCCCTGTGTGGTCGGCTCCTCTCAAATGAATCAGCTTACCAGTGTTTGGTGGCGTCGCAGGTGTGATAACTATCTACGCTCGCGGCCGTCTGCCATCCAACCTTCAGCGATGAGGGTTTGCTGGGGCTCACAGATGTCTCTCCTGAGTGAAGACAGCTTTTTGATC	Fungi	Basidiomycota	Agaricomycetes	Thelephorales	Thelephoraceae	Tomentella	tomentella-thelephora	gb|JQ991886.1	100	4.79e-85	92.92
OTU151	118_2476209|F|ITS2;size=12;	LT978707	ACACCTCAACTCTCGTGGCTTGCCATGATGAGCTTGGACTTTGGGGGTTTTGCTGGCCTACGGCCGGCTCCTCTCAAATGAATTAGCTTGCCAGTGTTTGGTGGCATCACAGGTGTGATAAATATCTACGCTTGTGGTTTTCCACCAGGTAACCTTCAGTGGATGGAGGTTCGCTGGGGCTCATAAATGTCTCTCCTCAGTGAGGACAGCTCTTTGAAC	Fungi	Basidiomycota	Agaricomycetes	Thelephorales	Thelephoraceae	Tomentella	tomentella-thelephora	JQ791173	100	2e-96	95.89
OTU152	119_2492678|F|ITS2;size=5;	LT978708	ACACCTCAACTCTCATGGTCTGCCATGATGAGCTTGGACTTTGGAGGTCTTGCCGGCTTGACCGTCGGCTCCTCTCAAACGAATCAGCTTGCCGGTGTTTGGCGGCGCCACGGGTGTGATAACTATCTACGCTTGTGGTGTTCCGTCAGGTAACCTTCAGTGATGGAGGTTCGCTGCAGCTCACAGACGTCTCTCCTCTTGGAAGACAGCTTTTTGAAC	Fungi	Basidiomycota	Agaricomycetes	Thelephorales	Thelephoraceae	Tomentella	tomentella-thelephora	gb|KM402993.1	98.17	1.34e-80	92.56
OTU153	119_2501635|F|ITS2;size=34750;	LT978709	ACACCTCAACTCCTCATGGCTTGCCATGATGAGCTTGGACTTGGGGGTCTTGCTGGCCTGTGGTCAGCTCCTCTCAAATGAATCAGCTTGCCAGTGATTGGTGGCACCACAGGTGTGATAAACATCTACGCTTGTGGTTCCCCACCATGTAACCTTTAGCGATAGAGGTTCGCTGGAGCTCACAAATGTCTTTCCTCAGTGAAGACAGCTCTTTGATT	Fungi	Basidiomycota	Agaricomycetes	Thelephorales	Thelephoraceae	Tomentella	tomentella-thelephora	dbj|LC013867.1	100	5.98e-109	100
OTU154	12_238988|F|ITS2;size=3538;	LT979782	AATTCTCAAAACCTTTCCTTTTTGGAAGGATTTTGGACTTGGAGGCCTTTTGCTGGTTTCACCTTGAAGCGAGCTCCTCCTAAATGTATTAGTGGGGTCTGCATTGTCGGTCCTTGGCGTGATAAGTCGTTTCTACGTCTTGGATTTCGGGCGCTGTACACCTGCTTCTAACTGTCTCATTGACAACGATGGTGTTCCGGTCACCGCCGATTTTTCGGTGGGCGGCTTGACCCACGAAACGAA	Fungi	Basidiomycota	Agaricomycetes	Russulales	Russulaceae	Russula	russula-lactarius	UDB013172	98	2e-100	94.19
OTU155	12_241923|F|ITS2;size=1804;	LT980876	AGTATCTCAAAAAATATTATGCCTTGGCATAGGTTTTTTGGACATTGGGAGTTGCCGGCTGCTAGCAGTGGGCTCTTCTGAAAAGCATTAGTTGAGGAGCTTTGCACTCTATTGGTGTGATAGACTATCTATGCCATGAGATGCTTTATGGGAACCTCTGCTGTCTAACTGTCTTTTATCGGACAATGTGATGA	Fungi	Basidiomycota	Agaricomycetes	Agaricales	Amanitaceae	Amanita	amanita	AB509892	100	3e-98	100
OTU156	12_244710|F|ITS2;size=8449;	LT978582	AATTCTCAACCATGTCTACTTTGGACATGGCTTGGAGTTGGGGGGTCTGCTGGCCCATGCATGGGTCAGCTCTCCTGAAATGCATTAGCAAAATGGCAGACATGCACGGCCTTTCGACGTGATAATGATCGTCGTGGCTGGAGTGTCAGATCGCCCACGTTGCTTCTAATCGATGTCCTTTTCGACAACGCGACG	Fungi	Basidiomycota	Agaricomycetes	Boletales	Boletaceae	Xanthoconium	boletus	AB509750	100	8e-99	100
OTU157	12_250825|F|ITS2;size=2759;	LT979783	AATCATCAAAACCCTTTTCCTTTTTGGAAAAGGATTTTGGACTTGGAGGCTTGATGCTCGCTTTCACTTTTTGAAAGCGAGCTCCTCTCAAATGAATTAGTGGGGTTTGCTTTGTCGATCCTTGACGTGATAAGATGTTTTTACGTTTTTGATTTGGCACTGCACCTGCTTCTAACCGTCTCACGGACGACGATGGTGCTTCGGTCACCGCCATCCACATTGGCGGGAGGCTGGACCCACCAAAAAA	Fungi	Basidiomycota	Agaricomycetes	Russulales	Russulaceae	Russula	russula-lactarius	GQ166871	100	1e-103	94.38
OTU158	12_251455|F|ITS2;size=26590;	LT979784	AAACCTCAAAACCCTTCTTCTTTTCGGGAAAGGGTTTTGGATTTGGAGGCCTTTTGCCGGTTTCATGTCGAAGCCAGCTCCTCCTAAATGAATTAGTGGGGTTTGCTTTAGTCGATCCTTGACGTGATAAGATGTTTCTACGTCTTGGGTTTGGCACTGTTGCCCACTTCTAACCGTCTCATGGACAACGATGGCGTTCCGGTCGCCGCCTCTCCGTAGGCGGTCGGCTTGACCCACAATAAAA	Fungi	Basidiomycota	Agaricomycetes	Russulales	Russulaceae	Russula	russula-lactarius	gb|EF619756.1	98.36	3.67e-91	92.56
OTU159	12_251902|F|ITS2;size=527;	LT979785	AATTATCAAAACCCTTTTCTACCAGAAAAGGACTTTTGGACTTGGAGGTTCAATGCTCGCTTTCACCTTTGAGAGTGAGCTCCTCTCAAATAAATTAGTGGAGTCTGCTTTGCCGATCCTTGACGTGATAAGATGTTTCTACGTTTTGGATATGGCACTGTCCCTTGGACCGTCCGCTTCTAACCGTCTCACAGACAATGATGGTGCTCTGGTCACCGCCTTCTAAGTTGGCGTGAGGCTGGACCCACAAATAAAA	Fungi	Basidiomycota	Agaricomycetes	Russulales	Russulaceae	Russula	russula-lactarius	gb|KM594800.1	91.8	2.34e-88	92.37
OTU160	12_251980|F|ITS2;size=17534;	LT981139	AATTAATCAACCTAGTAATTTAGTTTATTAGGATTGGACTTGGGATTTGCTGGCTTTGAGTAGTCAGCTATCCTTAAATGCATTAGTGAGTGGGAAGTCTTGGTGTGGCACGGCTTTCTTCTCGACGGTGATAAATAAATCGTTGGGTGAGCTGGAAGCATCATTAGGAAAGCTTGCTTTAAAATTTAGTAGACATGTGAAGTGTCTCTCTATTTTTTAAT	Fungi	Basidiomycota	Agaricomycetes	Boletales	Boletaceae	_	boletus	JN257994	86	6e-46	85.05
OTU161	12_252525|F|ITS2;size=1542;	LT980553	ATATATATATCAAGCCTTGCTCTTTGTTGAGTTGGTTTGGATGTGGGGGTTTTTTGCTGGCCTCTTGAAAAGGGCTCAGCTCCTCTGAAATGTATTAGCAGAACAACCCTGTTCATTGGTGTGATAACTATCAATGCTATTGAATGCGAAAGGGGCAGTTCAGCTTTCTAACAGTCCTTGGACAAAATTCATTGTTA	Fungi	Basidiomycota	Agaricomycetes	Agaricales	Cortinariaceae	Cortinarius	cortinarius	UDB002196	97	1e-67	91.28
OTU162	12_252670|F|ITS2;size=32;	LT979786	AATTCTCAAAACCCTTCCTTTTGGAAGGATTTTGGACTTGGAGGCCTTTTGCTGGTTTCACCTTGAAGCGAGCTCCTCCCAAATGTATTAGTGGGGTCTGCATTGTCGGTCCTTGGCGTGATAAGTTGTTTCTACGTCTTGGATTTTCGGCGCTGTACGCCCGCTTCTAACCGTCTCATGGACAACGATGGTGTTCCGGTCGCCGCCGATTTTTCGGTGGGAGGCTTGACCCACGAAACGAA	Fungi	Basidiomycota	Agaricomycetes	Russulales	Russulaceae	Russula	russula-lactarius	UDB013172	98	4e-113	97.51
OTU163	12_253375|F|ITS2;size=9;	LT979787	AATCATCAAAAACCCTTTTCTGTGATCAGTAAAAGGATTTTTGGACTTGGAGGTTCCATGCTTGCTTTCTCTTTTTGAAAGCAAGCTCCTCTGAAATGAATTAGTGGGGGTCTGCTTTGCTGATCCTTGACGTGATAAGATGTTTCTACGTTTTGGACTTAAGCATTGTACTTTGGGACACCTGCTCCTAACTGTCTCTTCGGACAAACAATGGTGCTCCGGTCACCGCGATCTACATCGGCGGGGAGGCTGGACCCACAATAAGA	Fungi	Basidiomycota	Agaricomycetes	Russulales	Russulaceae	Russula	russula-lactarius	gb|JQ991788.1	89.85	3.6e-106	96.65
OTU164	12_253380|F|ITS2;size=1117;	LT980554	ATATAAATATATCAAGCTTCTCTTGTTGAGTGGTTTGGATGTGGGGGTTTTCTGCTGGGCCCTCTTAAAAAAGGGTTCAGCTCCCCTGAAATGCATTAGCAGAACAACCCTGTTCATTGGTGTGATAACTATCTATGCTATTGAATGTGAGGGGGGCAGTTCAGCTTTCTAACAGTCCTTGGGACAATTCATCATTA	Fungi	Basidiomycota	Agaricomycetes	Agaricales	Cortinariaceae	Cortinarius	cortinarius	AY083183	100	4e-77	93.43
OTU165	12_254039|F|ITS2;size=7008;	LT980770	CACCCCTCAAGCCTGGCTTGGTGTTGAGCGACGTCCTTTTTGAGGACGCGCTTCGAAACGTTCGGCGGCGTGGCACCGGCTTTAAGCGTAGCAGAATCTTTCGCTTTTAAGGTTGAGGCCCCGTCTGCCGGAAGACCCACTCGCAA	Fungi	Ascomycota	Dothideomycetes	Hysteriales	Gloniaceae	Cenococcum	cenococcum	dbj|AB769890.1	100	1.45e-65	98.63
OTU166	12_255681|F|ITS2;size=81;	LT980555	ATATATATATCAACCCTCTCTTTGTTGAGTGGTTTGGATGTGGGGGTTTGCTGGCCTCTTAAATGGTTCAGCTCCCCTGAAATGCATTAGCAGAACAACCCTGTTCATTGGTGTGATAACTATCTACGCTTTTGAATGTGAAGGGAAGTTCAGCCTTCTAACTGTCTTTGGACAATTCATCATTA	Fungi	Basidiomycota	Agaricomycetes	Agaricales	Cortinariaceae	Cortinarius	cortinarius	DQ377411	100	1e-91	99.46
OTU167	12_255736|F|ITS2;size=24104;	LT980877	AGGATCTCAAAAAATATTGTGCCTTCAAGGCATACATTTTTTGGATGTTGGAAGTTGCCGGCTGCTAGCCAGTGGGCTCTTCTGAAAAGCATTAGTTGAGGAGCTTTGCACTCTATTGGTGTGATAGACTATCTATGCCATGAGATGCTTTATGAGAACCTCTGCTGTCTAACTGTCTTTTATCGGACAATGTGATGA	Fungi	Basidiomycota	Agaricomycetes	Agaricales	Amanitaceae	Amanita	amanita	KM052552	98	9e-94	98.46
OTU168	12_256207|F|ITS2;size=5512;	LT980229	AAACCTCAACCTCCTTGGTTTCTTCTGGAGACCGAAGCAGGCTTGGAATTTGGAGGCCTTTGCTGGCACCTCTGCCAGCTCCTCTCAAACAAATTAGCAGGGTCCTCTTTGCCGATCCTTGACGTGTGATAAGATGTTTCCATGTCTTGGTTTCTGGCTCTGTCACTTTTGGGACCTGCTTCTAACCGTCTGGACCTTGTGTCGAGACAAAGTTTCGAGCATGTGCAACCCCTTCTCGGGGAAGCTCTCCTCGACCCCACGAAC	Fungi	Basidiomycota	Agaricomycetes	Russulales	Russulaceae	Lactarius	russula-lactarius	KF432993	100	5e-137	100
OTU169	120_2505984|F|ITS2;size=112;	LT980352	AAATTCTCAACCATGAACAACTCTTGTTGCATCGTGGCTTGGATGTGGGGGGTCATATTGCAGGCTTTTCAAGTCTGCTCCCCTGAAATGCATTAGTAGTATCTGAGCAGAAACTACAAGGTGTGATAATTTATCTATTGCCTTCAGTAGTATGCTAAACCAGATTACACTGCTTCCAACAATGAAAAAGTGGATTTTAACCGACCACATTTTTTCTTTTGATAA	Fungi	Basidiomycota	Agaricomycetes	Agaricales	Inocybaceae	Inocybe	inocybe	FN550929	100	3e-99	95.3
OTU170	120_2505985|F|ITS2;size=2;	LT978710	ACACCTCAACTCTCATGGCTTGCCATGATGAGCTTGGACTATGGGGGTCTTGCTGGCCTGTGGTCAGCTCCTCTCAAATGAATCAGCTTGCCAGTGTTTGGTGGCGATCACAGGTGTGATAACTATCTACGCTTGTGGTTTTCCACCAGGTAACCTTCAGCGATGGAGGTTCGCTGGAGCTCACAAATGTCTTTCCTCAGTGAAGACAGCTCTTGATC	Fungi	Basidiomycota	Agaricomycetes	Thelephorales	Thelephoraceae	Tomentella	tomentella-thelephora	EF559293	98	4e-97	96.73
OTU171	120_2513945|F|ITS2;size=2;	LT978711	ACACCTCAACTCTCGTGGTCTTCCACGATGAGCTTGGACTCTGGAGGTTTGCTGGCCCTGTGGCCGGCTCCTCTCAAATGAATCAGCTTTCCGACGTTCGGTGGCATCGCAAGCGTGATAACTATCTACGCTCGTGGTCGTCTGCCGGGTAACCCTCAGCAATGGAGGTTCGTTGGGGCTTATAAACGTCTCTCCGGGGACAGCTTTTTGAAC	Fungi	Basidiomycota	Agaricomycetes	Thelephorales	Thelephoraceae	Tomentella	tomentella-thelephora	emb|HG426047.1	91.55	3.81e-66	90.77
OTU172	120_2521078|F|ITS2;size=19;	LT978712	ACACCTCAACTCCTCATGGCTTGCCATGATGAGCTTGGACATTGGGGGACTTGCTGGCCTGCAGTCAGCTCCTCTCAAATGAATCAGCTTGCCAGTGTTTGGTGGCACCACAGGTGTGATAAATATCTACGCTTGTGGTGTTTCCACCAGGTGTCCTCCAGCAATGGGGGCCTCTGGAGCTCATAAACGTCTCTCTGGGGACAGCTTTTTGAAC	Fungi	Basidiomycota	Agaricomycetes	Thelephorales	Thelephoraceae	Tomentella	tomentella-thelephora	dbj|AB848665.1	100	3.94e-81	92.99
OTU173	120_2524890|F|ITS2;size=7;	LT978713	ACACCTCAACTCTTCACGGTTTTCCGTGATGAGCTTGGACTTTGGGGGGTTTTGCTGGCCTACGGTTGGCTCCTCTAAAATAAATCAGCTTGCCAGTGTTTGGTGGGTACCATGGGTGTGATAACTATCTACGCTTGTGGTGTTTCCACCAGGTGTCCTCCAGCAATGGGGGCCTCTGGAGCTCATAAACGTCTCTCCGGGGACAGCTTTTTGAAC	Fungi	Basidiomycota	Agaricomycetes	Thelephorales	Thelephoraceae	Tomentella	tomentella-thelephora	dbj|AB848665.1	100	1.1e-76	91.67
OTU174	120_2525080|F|ITS2;size=184;	LT978714	ACACCTCAACTCTCATGGCTTGCCATGATGAGCTTGGACTCTGGGGGTTTGCTGGCCATGTGGTCTGCTCCTCTCAAACGAATCAGCTTGCCAGTGTTTGGTGGCATCACGGGTGTGATAACTATCTACGCTCGCGGTCGTCTGCCGGGTAACCCTCAGCAATGGAGGTTCACTGGGGCTCACAAACATGTCTCTCCTCAGCGAGGACAGCTTTTGAAC	Fungi	Basidiomycota	Agaricomycetes	Thelephorales	Thelephoraceae	Tomentella	tomentella-thelephora	gb|KF267198.1	100	2.88e-82	92.73
OTU175	120_2526535|F|ITS2;size=20;	LT978715	ACACCTCAACTCTCATGGTTCGCCATGATGAGCTTGGACTTTGGGGGTCTTGCTGGCCTGTGGTCAGCTCCTCTCAAATGGATCAGCTTGCCAGTGTTTGGTGGCATCACAGGTGTGATAACTATCTGCGCTTGTGGTTTTCCATCAGATAACCTTCAGTGATGGAGGTTCGCTGGAGCTCATAAACGTCTCTCCTAAGCGGGGACAGCTCTTTGAAC	Fungi	Basidiomycota	Agaricomycetes	Thelephorales	Thelephoraceae	Tomentella	tomentella-thelephora	emb|FR852142.1	99.54	4.68e-100	97.7
OTU176	121_2527978|F|ITS2;size=113;	LT981140	AATCGTCAACCATGCCTTGATTGATTTCAGAGCATGGCTTGGAGTTGGGGGTTTGCTGGCGGCGAAAAGCTATCAGCTCTCCTGAAATGCATTAGCAAAGGACGGCAAGTCTGATGTGGACGGCCTTTGACGTGATAATGATCGTCGTGGCTGGAGTGTCTGACGTGCAGGAATCGACCTTGCTCACAAACGGTTCACCCTAGCCTTCGAGCTGCTCAGCTGCCAGCTGGTCGTGAGACCAGCGAACGTTGGGGCGGCTCGAGGGACGTTTTGGGTTGTTTCGAA	Fungi	Basidiomycota	Agaricomycetes	Boletales	Boletaceae	_	boletus	KC812296	100	2e-92	88.42
OTU177	121_2531028|F|ITS2;size=1698;	LT978716	ACACCTCAACTCTTCATGGTTTTCTGTGATGAGCTTGGACTTTGGGGGTTTTGCTGGCCTATGGTCGGCTCCTCTAAAATGAATCAGCTTTCCGGTGTTTGGTGGGCGTCACAGGTGTGATAACTATCTACGCTTGTGGTTTTTCCACCAGGTAACCTTCAGCAGTGGAGGTTCGCTGGAGCTCATAGACGTCTCTCCTCAGCGAGGACAACCCTTTGAAT	Fungi	Basidiomycota	Agaricomycetes	Thelephorales	Thelephoraceae	Tomentella	tomentella-thelephora	UDB018379	100	2e-101	96.83
OTU178	121_2531140|F|ITS2;size=1364;	LT981039	AGTTCTCAACCACATTGAATATTTTTTGGTGTGGCTTGGTTATTGGAAGCTTTGCAGGTCCATATTCTATATGGATCTGCTCTTCTAAAATGCATTAGTGGTATCTGAGCAGTAGCTACTACAGATGTGATAATATTTTTCTACATCTTTGGTCACGCTGCATAAACAGATTATACTGCTTCTAAAAGTGAATGTATTGTGATTT	Fungi	Basidiomycota	Agaricomycetes	Agaricales	Inocybaceae	_	inocybe	gb|JN168721.1	88.29	1.66e-40	84.66
OTU179	121_2532261|F|ITS2;size=48;	LT980556	ATATATCAACCTTCTCTTATTTGAGTTGTTTGGATGTGGGGGTTTGCTGGACTCTTAAATGATTCAGCTCCCCTAAAATGCATTAGCAGAACAACCTGTTCATTGGCGTGATAATTATCTATGCTATTGAATGTGAGGGCAGTTCAGCTTTCTAATCGTCCTTGGACAATTTATCATTA	Fungi	Basidiomycota	Agaricomycetes	Agaricales	Cortinariaceae	Cortinarius	cortinarius	GQ478003	100	1e-87	99.44
OTU180	121_2533101|F|ITS2;size=4;	LT979788	AATTCTCAAAACCTTTTCTTTGATGGGAAGAGGATTTTGGACTTGGAGGCTTGATGCTTGCTTTCGCTCTCGAAAGTGAGCTCCTCTCAAATGAATTAGTGGGGTCTGCTTTGCTGGTCCTTGACGTGATAAGATGTTTCTACGTTTTGGATTTGGCACCGTCTCTCGCTTCCAACTGTCCTGCTTGGACAAAAGATGGTGCTTTGGTCCTCACTCGTCTATGTTGGCGGGGGGAGGGCTGGACCCACAAAAGAAAA	Fungi	Basidiomycota	Agaricomycetes	Russulales	Russulaceae	Russula	russula-lactarius	gb|GQ240917.1	90.27	2.47e-77	89.67
OTU181	121_2544654|F|ITS2;size=3799;	LT978717	ACACCTCAACTCTCACGGTTTGCCGTGATGAGCTTGGACTTTGGAGGTTTTTGCTGGCCCACGGTCGGCTCCTCTCAAATGAATTAGCTTGCCAGTTTTCGGTGGCATCACAGGTGTGATAACTATCTACGCTTGCGGTCGTCCGCTGGGTAAACTTTCGGTGACGGAGGTTTGCTGGAGCTTATAAACGTCTCTCCTCAGCGAAGACAGCCATTTGAAC	Fungi	Basidiomycota	Agaricomycetes	Thelephorales	Thelephoraceae	Tomentella	tomentella-thelephora	emb|LN909971.1	100	4.72e-95	95.91
OTU182	122_2545041|F|ITS2;size=18;	LT978718	ACACCTCAACTCTCATGGCTTGCCATGATGAGCTTGGACTTTGGGGGTCTTGCTGGCCTGCAGGCCGGCTCCTCTTAAATAAATTAGCTTGCCAGTGTCTGGAGGCATCACAGGTGTGATAACTATCTACGCTTGTGGTTTTCCCTCAGGTAACCTTCAGTGATGGAGGTTCACTGGGGCTTATAAACATCTCTCCTCGGTGAGGACAGATTTTGACT	Fungi	Basidiomycota	Agaricomycetes	Thelephorales	Thelephoraceae	Tomentella	tomentella-thelephora	EU625861	99	6e-91	94.47
OTU183	122_2545263|F|ITS2;size=89;	LT979789	AATCATCAAAAACCCTTTTCTGTTTACTGAAAAGGATTTTTGGACTTGGAGGTTTAATGCTTGCCTTTCACTTTTGAAAGTGAGCTCCTCTCAAATGAATTAGTGGGGTCCGCTTTGTCGGTCCTTGACGTGATAAGATGTTTCTACGTTTTGGATTTGGCACTGTCCCTTTGGATTCCTGCTCCTAACTGTCCAACGGACAAACGATGGTGTTCCGGTCGTCGCCGTCTACATTGGCGGGGGAGGGCTGGACCCACAAAAGAAAA	Fungi	Basidiomycota	Agaricomycetes	Russulales	Russulaceae	Russula	russula-lactarius	gb|HM105560.1	100	5.77e-134	99.62
OTU184	122_2546799|F|ITS2;size=2;	LT978719	ACACCTCAACTCTCATGGCTTGCCATGATGAGCTTGGACTATGGGGGTCTTGCTGGCCTGTGGTCAGCTCCTCTCAAATGAATCAGCTTGCCAGTGTTTGGTGGCGATCACAGGTGTGATAACTATCTACGCTTGTGGTTTTCCACCAGGTAACCTTCAGCGATGGAGGTTCACTGGGGCTTATAAACATCTCTCCTCGGTGAGGACAGATTTTGACT	Fungi	Basidiomycota	Agaricomycetes	Thelephorales	Thelephoraceae	Tomentella	tomentella-thelephora	EF559293	99	1e-93	95.39
OTU185	122_2547161|F|ITS2;size=9;	LT979496	TACTCTCACACTCTAATTAATTTTGGAGAAGTGGACTTGGGTGTTGCCGCTTTGCAGTGGCTCATCTTAAATATGCTAGTGCAACTCGTAGTTGGATATAGTACAGCGTGATAAGTATCTTCGCTGGCACCTCTCAAGAGGGTATCCGATTGGGAGCTCTGTGCTTTCAAACCGTCTTCGGACACTCTCTGACA	Fungi	Basidiomycota	Agaricomycetes	Sebacinales	Sebacinaceae	Sebacina	sebacina	gb|JQ347198.1	90.72	6.22e-69	94.35
OTU186	122_2547397|F|ITS2;size=18;	LT980760	AAATTCTCAAAGTAAATCTTTTGTTAATTCAATTGGTTTACTTTGGATTTGGAGGCTCTGTGGATTTTTACAATCCACTCCTCTTGAATACATTAGCTGGATCTCAGTATATACTTGGTTCCACTTGGTGTGATAAGTATCACTCGCCGAGGACACCACCTGTCAAAAGGTGTGGCCAAGGAATACAGATGAACCGCTTCCAATAGTCTATTGAATTAGACAATTTATTTTAAG	Fungi	Basidiomycota	Agaricomycetes	Cantharellales	Ceratobasidiaceae	Ceratobasidium	ceratobasidium1	gb|GQ175299.1	100	9.19e-83	91.45
OTU187	122_2551638|F|ITS2;size=8;	LT978720	ACACCTCAACTCTCATGGCTTGCTGTGATGAGCTTGGACTTTGGGGGTCTTGTTGGCCTGTGAGCCAGCTCCTCTTAAATGAATTAGCTTGCCAGTGTTTGGTGGCATCACAGGTGTGATAACTATCTATGCTTGTGGTTTCCCATCAGATAACCTTCAGTGATGGAGGTTCGCTGGGGCTCATAAACGTCTCTCCTCAGTGAAGACAGCTCTTTGAAC	Fungi	Basidiomycota	Agaricomycetes	Thelephorales	Thelephoraceae	Tomentella	tomentella-thelephora	gb|KR149772.1	99.09	3.67e-91	95.39
OTU188	122_2556299|F|ITS2;size=20;	LT980230	AAATCTCAACCTTCTCGGTTTCTTCTGGACACCGGAGGAGGCTTGGACTTTGGAGGCCTTTGCTGGCTCTTTCGAGAGCCAGCTCCTCTTAAATGAATTAGTGGGGTCCTCTTTGCCGATCCTTGACGTGTGATAAGATGTTTCCATGTCTTGGTTTCTGGCTCTGTCGCTTTTGGGACTCGCTTCTAACCGTCTCAACCTTGCATCGAGACAACGTTTGAGGGCGTCTCCCTTCTCGGGAAACCCTCTCAACCTCACGAAC	Fungi	Basidiomycota	Agaricomycetes	Russulales	Russulaceae	Lactarius	russula-lactarius	UDB023771	100	3e-124	97.33
OTU189	122_2556500|F|ITS2;size=287;	LT979497	GTACTCTCACACTTCCAATTCCTTTGGATTGGGAGCGGTGGACTTGGGCGTTGCTGCTTGACTGTGGCTCACCTGAAATACGTTAGTGCACCTCTTGATTGGACATAGTACGGCGTGATAAGTGTCTTCGCCGGCTCCTCGCAATGAGGGTGGCCGATCGGGAGCTCTGTTGCTTCAAACTGTCTTCGGACAATCTTCTGACA	Fungi	Basidiomycota	Agaricomycetes	Sebacinales	Sebacinaceae	Sebacina	sebacina	AB848616	100	3e-98	98.52
OTU190	123_2561459|F|ITS2;size=171;	LT980761	AAATCTTCAAGATAGATCTTTCGTTCATTCGATTGATTTTATTTTGGACTTGGAGGTCTTGCAGATTCTCTCATGTCTGCTCCTCTCAAATGCATTAGCTGGATCTCCGTGAGCCTCGGTTCCACTCGGCGTGATAAGTAATCACTCGCTGAGGACACTGTAAAAAGTGGCCAGGCCCACAGACGAACTGCTTCCAACTGTCCGTTGGCTTGGACGATTGAACCTTTATG	Fungi	Basidiomycota	Agaricomycetes	Cantharellales	Ceratobasidiaceae	Ceratobasidium	ceratobasidium2	gb|KP783433.1	100	5.49e-85	91.78
OTU191	123_2561744|F|ITS2;size=6;	LT978721	ACACCTCAACTCTCATGGCTTGCCATGACGAGCTTGGACTTTGGGGGTCTTGTTGGCCTGTGAGCCAGCTCCTCTTAAATAAATCAGCTTGCCGGTGTTTGGTGGCGTCACAGGTGTGATAACTATCTACGCTTGTGGTCCTCCACCATGTAACCTTCAGTGATATGGAGGTTCGCTGGAGCTCACAAATGTCTTTCCTCAGCGAAGACAGCTCTTGATC	Fungi	Basidiomycota	Agaricomycetes	Thelephorales	Thelephoraceae	Tomentella	tomentella-thelephora	JX630406	99	1e-82	92.2
OTU192	124_2584817|F|ITS2;size=712;	LT980353	ACTTCTCAACTGCACTAGTTCTCTCTGGTGTAGCTTGGATATGGGGGGATTTTGCAGGCTTTTTGTTTTGTTCAAGAGGCTCTGCTCCCCTGAAATATATTAGTGGTCTCTGAGCAAACTACTACAGGTGTGATAATTATCTATGCCTTTGGGTATTCTGCATAAACAGATTGCACCGCTTCTAAACAAAAGTTGTTTGATAA	Fungi	Basidiomycota	Agaricomycetes	Agaricales	Inocybaceae	Inocybe	inocybe	gb|KU587024.1	50.25	1.31e-26	90.39
OTU193	124_2584826|F|ITS2;size=129;	LT979790	AATTCTCAAAACCTGTTCTTCGATTGGGGAAAGGGTTTTGGACTTGGAGGATCAATGCTTGCCCTCACTTTGAAGGCGAGCTCCTCTCAAATAAATTAGTGGGGTTTGCTTTGCTGATCCTTGACGGTGATAAGACATCTCTACGTTTTGGATTTGGCGACCGTCCCTCGCTTCTAACCGTCCTACGGACAATGATGGGTGCACCGGTCCACCACCTTACATTGGTGGGGGGCTGGACCCACAAAAAAGGA	Fungi	Basidiomycota	Agaricomycetes	Russulales	Russulaceae	Russula	russula-lactarius	UDB016089	100	6e-121	98.01
OTU194	124_2584829|F|ITS2;size=811;	LT979791	AATTCTCAAAACCCTTTTCTTTGGAAAGGATTTTGGACTTGGAGGCCTTTTGCTGGTTTCGCCTCGAAGCGAGCTCCTCCTAAATGAATCAGTGGGGTTTGCTTTGCGGATCCTTGACGTGATAAGTCGTTTCTACGTCTTGGATTTTTTGCACTGTACACCTGCTTCTAACCGTCTCATTGACAATGATGGTGCTCCGGTCACCGCCGATTCGTCGGTCGGGAGGCTGGACCCACAAAACGAA	Fungi	Basidiomycota	Agaricomycetes	Russulales	Russulaceae	Russula	russula-lactarius	gb|FJ803975.1	100	2.15e-108	96.33
OTU195	124_2584879|F|ITS2;size=5834;	LT980322	AATTCTCAACCTTCCAGCTTTTATAAGCTTGGTTAGGCTTGGATGTGGGAGTTGCGGGCTTCATCAATGAGGTCGGCTTTCCTTAAATGCATTAGCGGAACTTTTGTGGACCGTCTATTGGTGTGATAATTATCTACGCCGTGGATGTGAAACAGCTTTATGAAGTTCAGCTTCAAACCGTCCATTCACTTGGACAATTTTGACA	Fungi	Basidiomycota	Agaricomycetes	Agaricales	Hydnangiaceae	Laccaria	laccaria	AB848522	100	2e-104	100
OTU196	124_2584904|F|ITS2;size=602;	LT980718	AATTTCTCAAGCTTGGATGGATTTTTTCTGTCCTTAGTTTGGTTGTTGGGCTTTGCCGTGTCCCTTCATTGGAACAGCTGGCCTTAAAAGCATTAGCTGATCCTTGTGTGGCACTGGTTCTACTCAGCATGATAATATTCTGATCATTGAGGACATCTTTGGGGATGGCCGGTCTTCATTTGGGTTGCTTCTAAACCTGGTTTTACAGTTTGTTTCAATCTGTATTCCACTTTTCAA	Fungi	Basidiomycota	Agaricomycetes	Cantharellales	Clavulinaceae	Clavulina	clavulina	KC505582	100	2e-115	98.31
OTU197	124_2586393|F|ITS2;size=16;	LT979792	AATCCTCAAAACCCATTCTTCGATCGGGGAAAGGGTTTTGGACTTGGAGGATCAATGCTTGCCCTCACTTTGAAGGCAAGCTCCTCTCAAATAAATTAGTGGGGTTTGCTTTGCTGATCCTCGACGGTGATAAGACATCTCTACGTTTTGGATTTGGCGACTGTCCCTTGCTTCTAACCGTCCTATGGACAATGATGGGTGCACCGGTCCACCGCCTTACATTGGAGGGGGGCTGGACCCACAAAAAAGGA	Fungi	Basidiomycota	Agaricomycetes	Russulales	Russulaceae	Russula	russula-lactarius	UDB016089	100	6e-116	96.81
OTU198	124_2599594|F|ITS2;size=9351;	LT979793	AATTCTCAAAACCCCTTTCTTTGGTCTTTGACCGGTGAAGGGATTTTGGACTTGGAGGCTTTTTGCTGGCTTCATCTTGAAGTGAGCTCCTCTTAAATAAATCAGTGGGGTTCGCTTTGCCGATCCTTGACGTGATAAGATGTTTCTACGTCTTGGGTTCAGCAGAGTCACCTGCTTCTAACTGTCTTATTGACAAATGATGGTGTTCCGGTCACCGCCGTTTCGTCGGCGGGAGGCTTGACCCACGAACGAA	Fungi	Basidiomycota	Agaricomycetes	Russulales	Russulaceae	Russula	russula-lactarius	HQ204702	84	2e-75	90.7
OTU199	125_2612293|F|ITS2;size=17;	LT978722	ACACCTCAACTCATTGTGGTTTTCCACGATGAGCTTGGACTTTGGGGGTTTTGCTGGCCTACAGTCAGCTCCTCTAAAATGAATCAGCTTACCAGTGTTTGGTGGGTATCATGGGTGTGATAACTATCTACGCTTGTGGTTTCCCGCCAGGTAACCTTCAGCAATGGAGATTCGCTGGGGCTCATAAAAGTCTCTCCTCGGTGAGGACAGCTTTTTGAAC	Fungi	Basidiomycota	Agaricomycetes	Thelephorales	Thelephoraceae	Tomentella	tomentella-thelephora	gb|JX625355.1	99.55	1.83e-79	91.78
OTU200	126_2619591|F|ITS2;size=1533;	LT979469	TAATTCTCAACCATGTCTCGGCATGGCTTGGACTTGGGAGTTGCTGGCATCGCAAGACGTCGGCTCTCCTTAAACGCATTAGTGGACCAGCGTGTTCCTCGGACGTGCACGGCCTCGTTCGACGTGATAACGATCGTCGTCGGGCTGGAGCGTCTGGAATCAAGCCTCTGCTTCCAACTCGAGTGACTCGGCCTGCTCAGCTACTAGTCTAGCCACGAACGCGAGCAGGCTCAGCCTCATCACACCCC	Fungi	Basidiomycota	Agaricomycetes	Boletales	Boletaceae	Strobilomyces	boletus	AB275211	91	6e-116	100
OTU201	126_2622511|F|ITS2;size=4;	LT981073	CCATCCCCTCAAGCTCCGCTTGGCTGGTTGGGCCGACGCCCCCCGTGGCTTTGTGCCCGGGGGGACGGGCCCGAAAGGCAGTGGCGGCTCCCGGAGGGTTGGTCCCTTGGGGCGGTGATACATGGGTTGTCATCTTCCACCGCTCTGTTGGCCACGCTCCGGGGGTCCATCGAACGATCGGTCTTCCCCTTTA	Fungi	Ascomycota	Eurotiomycetes	Eurotiales	Elaphomycetaceae	_	elaphomyces	KF954066	100	1e-86	96.43
OTU202	126_2631850|F|ITS2;size=124;	LT980857	AATCCTCAACCCTGTCCGTCAGTCAGGGCTTAGACTTTGGAGCGTGCTGACGAAGGTTGGCTCCTCTTTAAATGCATCAGCGGAGAAAAACAAACCTTTTTTCCCCCTTCAGCGTGATAACTGTGTTGCGCTGTGGTTGCAAAAGGGTCCGCTCATAATTGTCCTTGGACAAACACTGAATCTG	Fungi	Basidiomycota	Agaricomycetes	Atheliales	Atheliaceae	Amphinema	amphinema-tylospora	gb|KC179047.1	100	2.39e-73	94.57
OTU203	127_2634698|F|ITS2;size=14681;	LT980479	ACAACCAGTTCAATCCCTCTTAGAAAATATTTGGGGGATTGGTTATTGGTGAATGAGGGGATGCGTGCATCACGTTGAATCACCTCACCACCGAAATTCAGAGGCGGTTTGTCCCCACGTGTTTGTGGCGTTGTAAAGGCTTACCAGCACTATTCGCTCGCATCGTGGGTGCACTGCTTGCCATTGGAGAAATCCCCATTCATCAAA	Fungi	Ascomycota	Pezizomycetes	Pezizales	Pyronemataceae	Humaria	genea-humaria	KP753312	100	9e-104	99.52
OTU204	127_2635410|F|ITS2;size=917;	LT979498	GTACTCTCACACTCTCTGATCCTTTGGATTTGGGGAGCGGTGGACTTGGGTGCTTGCTGCTTTCTATGTGGCTCACCTCAAATGTGTTAGTGCATCTCTTGATTGGACATAGTACGGCGTGATAAGTGTCTTCGCCGGCACCTCATAAGAGGGTGGCCGATTGGGAGCTCTGTGCTTTCAAACCGTCTTCGGACAACTTCTGACA	Fungi	Basidiomycota	Agaricomycetes	Sebacinales	Sebacinaceae	Sebacina	sebacina	gb|JQ420941.1	100	1.07e-96	98.54
OTU205	127_2641358|F|ITS2;size=10;	LT980231	AATTCTCAACCTTTTACGATTCTTCTTGATCGGAGAAGGCTTGGACTTTGGAGGCTTCTGCTGGCCTCTCTTGAAGCCAGCTCCTCTTAAATGCATTAGCGGGGGTTCCCTTTTGCCAGTCCTCGACGTGATAGGGCTTCTTTCTACGTCTGGGGATTTGGCTTGAGACCCGCTTCTAATGGTCTCGTTGAGACGCTGTGAAAAACC	Fungi	Basidiomycota	Agaricomycetes	Russulales	Russulaceae	Lactarius	russula-lactarius	HM639278	98	3e-84	94.55
OTU206	127_2641730|F|ITS2;size=3;	LT979499	TACTCTCACACTCTAATTTATTTTGGAGCGGTGGACTTGGGTGTTGCTGCTTTGCTGTGGCTCATCTTAAATATGCTAGTGCAACTCATAGTTGGATATAGTACAGCGTGATAAGTATCTTCGCTGGCACCTCATGAAGAGGGTATCCGATTGGGAGCTCTGTGCTTCCAACCGTCCCATCCGGGACAATCTCTGACA	Fungi	Basidiomycota	Agaricomycetes	Sebacinales	Sebacinaceae	Sebacina	sebacina	gb|JQ347198.1	100	7.93e-78	93.94
OTU207	127_2643869|F|ITS2;size=4;	LT980771	TCACCCTTCAAGCCCTGCGCTTGGTGTTGGGCGACGTCCTCTTTGGGGACGCGCCTCAAAACGCTCGGCGGCGTGGCACCGGCTTTAAGCGTAGCAGAATCTTATCTTTCGCTTTGAAAGTCGGGGCCACATCTGCCGGAAGACCTACTCGCAA	Fungi	Ascomycota	Dothideomycetes	Hysteriales	Gloniaceae	Cenococcum	cenococcum	AB839374	100	1e-70	98.05
OTU208	127_2648011|F|ITS2;size=2626;	LT979500	GTACTCTCACACTCTCCGATTTGGGGAGCGGTGGACCTGGGTGCTTGCTGCTTTCGTTGTGGCTCACCTCAAATGCGTCAGTGCATCTCTTGATTGGACATAGTACGGCGTGATAAGTGTCTTCGCCGGCACCTCGTAAGAGGGTGGCCAACTGGGAGCTCTGTGCTTTCCAACCGTCCTCGGACAATCTCTGACA	Fungi	Basidiomycota	Agaricomycetes	Sebacinales	Sebacinaceae	Sebacina	sebacina	AB506922	100	2e-99	100
OTU209	128_2655230|F|ITS2;size=3410;	LT980851	AAATCTCAAATCCTAGCTTTGCTTCGTCGGAGCTCGGTTTTGGACTTTGGGAGTCTGCGGGCGACCCTTTTGCCAAGGGACGTCGGCTCTCCTCAAATGCATTAGCGGTTGGGCGCGAGCCTTTGCACGGCACGGCCTGTTCGACGTCGTAGTGATCGTCGCGGGCTGGAAGTGCTTGGGTCGACATGTCTCATGCTTCTAACTATGCACAAGCTATACTTAGCTAGTGAATTAAG	Fungi	Basidiomycota	Agaricomycetes	Boletales	Diplocystidiaceae	Astraeus	pisolithus-scleroderma	AB535107	100	2e-121	100
OTU210	129_2658487|F|ITS2;size=112;	LT979794	CATCCTCAAACCTTCTTGGTTTCTTGACCATGGAAGGCTTTGGACCTTGGAGGTTTTTGCTGGCTTTCCTTTGTTGGAGCCAGCTCCTCTGAAATGAATTAGTGGGGTCTGCTTTGCCGATCCTTGACGTGATAAGATATTTTCTACGTCTTGGGTTTTGCACTCCTGCTTCTAACCGTCTCACAGAAGACAAATGGTCTTTGACCCATGAA	Fungi	Basidiomycota	Agaricomycetes	Russulales	Russulaceae	Russula	russula-lactarius	emb|LN911928.1	100	1.29e-105	100
OTU211	13_257254|F|ITS2;size=6756;	LT978561	AATTCTCAACCATTCTCATTTTCTCTTTAAGAGAGAGAGAGACATGGCTTGGAGTTGGGAGTTGCTGGCAGGGAAACTGTCAGCTCTCCTTAAATATATTAGCGATCGAGTTGGCTAGTCTTTGACATGCACGGCCTCTGACGTGATAATGATCGTCATGGCTGGAGTGTCTTTCCTAGACTATGTACACAGATAGCTTCTAATTTACATTGGGAAAGAAAGGGAAGAGTTTAGCTACTAGGCAGTCTAACGATTTAGGCTGGCGAACCCAAGCTTGATCTTTCTTTCTCTATCTTCATTG	Fungi	Basidiomycota	Agaricomycetes	Boletales	Boletaceae	Xerocomus	boletus	JF273511	89	3e-120	95.9
OTU212	13_265770|F|ITS2;size=434;	LT978723	ACACATCAACTCTCATGGCTTGCCGTGATGAGCTTGGACTTTGGGGGTCTTGCTGGCCTGTGGTTGGCTCCTCTCAAATGAATTAGCCTGCCGGTGTTTGGTGGGATCACAGGTGTGATAGCTATCTACGCTTGTGGTTTTCCACCAGGTAAACCTCAGCGATGGAGGTTCACTGGAGCTTATAAATGTCTCTCCTCAGCGAGGACAGGTTTTGACC	Fungi	Basidiomycota	Agaricomycetes	Thelephorales	Thelephoraceae	Tomentella	tomentella-thelephora	UDB013033	100	6e-101	97.24
OTU213	13_274789|F|ITS2;size=10706;	LT979795	CATCCTCAACCTTCTCGATCTTTGCGATCGGGGAAGGTTTGGACTTTGGGGGTTTATGCTGGCCTCCTTCGAAGCCAGCTCCCCTTAAATGGATTAGTGGGGTTCGCTTTGCCGATCCTCGACGTTGATAAGATGTTTCTACGTCTTGGGTTGGGCACTGTCTTTCGGGAACCTGCTTCTAACCGTCTCGCGAGAGACGACGCGTTTGAA	Fungi	Basidiomycota	Agaricomycetes	Russulales	Russulaceae	Russula	russula-lactarius	gb|KC679827.1	100	1.67e-104	100
OTU214	13_276766|F|ITS2;size=1484;	LT978724	ACTTCTCAACTCCTCACGGTTTGCCCGTGATGAGCTTGGACTTTGGGGGTCTTGCCGGCCTGCGGGTCGGCTCCTCTCAAATGAATCAGCTTGCCAGTGTTTGGTGGCATCACAGGTGTGATAACTATCTACGCTTGTGGTTTTCTGCCAGGCAACCTCCAGCGATGGGGGTTCACTGGAGCTCACAAATGTCTCTCCTCGGTGAGGACGGCTCTTTGAAC	Fungi	Basidiomycota	Agaricomycetes	Thelephorales	Thelephoraceae	Tomentella	tomentella-thelephora	emb|LN911551.1	98.64	2.77e-97	96.8
OTU215	13_277137|F|ITS2;size=2623;	LT981220	TAACCCTCAAGCCTAGCTTGGTGTTGGGGCCTGCTGTTACCGGCAGCCCTTAAAACTAGTGGCGGTGCCACCTGGCTCTAAGCGTAGTAATACTTCTCGCTATAGAGTCCCGGTGGATGCTTGCCATCAACCCCTAATTTTCTAT	Fungi	Ascomycota	Leotiomycetes	Helotiales	_	_	helotiales1	JQ976010	100	4e-71	100
OTU216	13_277332|F|ITS2;size=7982;	LT980772	CACCACTCAAGCCTGGCTTGGTGTTGGGCGACGTTCCCTTTGGGGGCGCGCTTCGAAACGCTCGGCGGCGTGGCACCGGCTTTAAGCGTAGCAGAATCTTTCGCTTTGAAAGTCGGGGCACCGTCTGCCGGAAGACCTGCTCAA	Fungi	Ascomycota	Dothideomycetes	Hysteriales	Gloniaceae	Cenococcum	cenococcum	AB873201	100	1e-70	100
OTU217	13_278634|F|ITS2;size=6189;	LT979796	AAATCATCAAAAAGCCCTTTTGGTGGGCTTTTTTGGACTTGGAGGTTTCATTGCTTGCTTTTGCTTTTTTAAAGTAAGCTCCTCTCAAATAAATTAGTGGGGGTCTGCTTTGCTGGTCCTTAATGTGATAAGATGTTTCTACATTTTGGATTTAGCACTGTCACTTGGATGCCTGCTTCTAACTGTCCCTTGGACAATGATGGTGCTCCTGGTCGTCGTCATTTACATTGGCGGGAGGCTGGACCCACAAAAGGAA	Fungi	Basidiomycota	Agaricomycetes	Russulales	Russulaceae	Russula	russula-lactarius	JF273536	100	7e-116	96.11
OTU218	13_280990|F|ITS2;size=2341;	LT979797	AATCCTCAAAACCCTTCCTTTCGGAAGGATTTTGGACTTGGAGGCCTTTTGCTGGTTTCACCTTGAAGCAAGCTCCTCCCAAATGTATTAGTGGGGTCTGCATTGTCGGTCCTCGGCGTGATAAGTTGTTTCTACGTCTTGGATTTTTGGCGCTGTACGCCCGCTTCTAACTGTCTCATTGACAACGATGGTGTTCCGGTCGCCGCCGATTTTTCGGTGGGAGGCTTGACCCACGAAACAAA	Fungi	Basidiomycota	Agaricomycetes	Russulales	Russulaceae	Russula	russula-lactarius	UDB013172	98	4e-108	96.27
OTU219	13_281210|F|ITS2;size=3918;	LT979798	AATTCTCAAAACCCTTTCTTTTGGTCATTTTCGACCGCGGAGAGGATTTTGGACTTGGAGGCCTTTTTGCTGGCTTCACCTTGAAGCGAGCTCCTCCCAAATGTATTAGTGGGGTCTGCATTGTCGGTCCTTGGCGTGATAAGTTGTTTCTACGTCTTGGATTTTTGGCGCTGTACACCTGCTTCCAACCGTCTCATTGACAACGATGGTGTTCCGGTCGCCGCCGATTTTTCGGTGGGAGGCTTGACCCACGAAACAAA	Fungi	Basidiomycota	Agaricomycetes	Russulales	Russulaceae	Russula	russula-lactarius	KM085392	100	3e-124	97.69
OTU220	13_281510|F|ITS2;size=21232;	LT980773	CACCACTCAAGCCTGGCTTGGTGTTGGGCGACGTCCCTCTAAGGGACGCGCCTCGAAACGCTCGGCGGCGTGGCACCGGCTTTAAGCGTAGCAGAATCTTTCGCTTTGAAAGTCGGGGCCCCGTCTGCCGGAAGGCCTACTCGTAA	Fungi	Ascomycota	Dothideomycetes	Hysteriales	Gloniaceae	Cenococcum	cenococcum	HE814146	100	4e-66	97.95
OTU221	13_283571|F|ITS2;size=873;	LT979799	ACATCCTTCAACCTTTCTTGGTTTCTCAATCAAGGAAGGCTTGGACTTTGGAGGTTTTTCATTGCTGGCCTCTGTTGAAGCTAGCTCCTCCTAAATGGATTAGTAGGGTCTGCTTTGCGCGATCTTTGACGTGATAAGATGTTTCTACGTCTTGGGTTTAGCACTGTCGCTTTGGACCCTGCTTCTAACCGTCTTGCATTCAGGACAGTATCATGAA	Fungi	Basidiomycota	Agaricomycetes	Russulales	Russulaceae	Russula	russula-lactarius	UDB013288	100	6e-101	97.24
OTU222	130_2679962|F|ITS2;size=11445;	LT979800	AACCCTCAAAAACCCTCTTCTTTGAGGATTTTTGGACTTGGAGGCTTGATGCTCGCTTTCACGTTCGAAAGCGAGCTCCTCTCAAAAGAATCAGTGGGGTCTGCTTTGCCGGTCCTTGACGTGATAAGATGTTTCTACGTTTCGGATCTGGCATCGTCCCCTTGGGGATGCCCCTGCTCCTAACCGTCTCGGTCACCGCCATCTTTAACGGTTGGCCGGAGGCCGTGGACACCCACAAAAGAAAA	Fungi	Basidiomycota	Agaricomycetes	Russulales	Russulaceae	Russula	russula-lactarius	AB509802	75	1e-88	98.91
OTU223	130_2682933|F|ITS2;size=33674;	LT979801	ATTTCTCAAACCTTCTTGGTTTCTTGACCAAGAAGGCTTTGGACTTGGAGGTCTTTGCCGGCTTTGCGAAAAAGTCGGCTCCTCTTAAATGCATTAGTGGGGTCCCCTTTGCCGATCTCTAGGCGTTGATAATATGCTTCTACGTCTTGGGATTTGCTCTGTTCTTTGGGAACTCGCTTCTAACCGTCTCGGTCGGAGACATCGTTCGAGCTTGCTCGACCCACGAA	Fungi	Basidiomycota	Agaricomycetes	Russulales	Russulaceae	Russula	russula-lactarius	AB507010	100	2e-116	100
OTU224	131_2695102|F|ITS2;size=40;	LT979802	AATCATCAAAGACCCCTTTCTTTGAAGGGATTTTTGGACTTGGAGGTCTCATGCTCGCTTTTGCTTTCGAAAGTGAGCTCCTCTTAAATGAATTAGTGGGGTCTGCTTTGCTGGTCCTTGACGTGATAAGGTGTTTCTACGTTTTGGATTTGGCACTGTTCCTTGGATGCCTGCTTCTAATCGTCTCTCGAGACAATGATGGCGTTTCGGTCACCGGCCAAATCTACATTGGCGGGCGGGAGGCTGGACCCACAAAAAGAAAAGA	Fungi	Basidiomycota	Agaricomycetes	Russulales	Russulaceae	Russula	russula-lactarius	emb|HF674648.1	90.94	1.3e-100	94.65
OTU225	131_2698353|F|ITS2;size=24;	LT980858	AATCCTCAACCCCGTCCGTCGGTTGGGGCTTGGACTTTGGAGCGTGCTGGCGAAGGTCGGCTCCTCTTTAAATGCATTGGCGGAGAAAAACAAACCTTTTTTCCCCCTTCAGCGTGATAACTGTGTTGCGCTGTGGTTGCGAAAGGGTCCGCTCATAATCGTCCTCGGACAAACACCGAATCTG	Fungi	Basidiomycota	Agaricomycetes	Atheliales	Atheliaceae	Amphinema	amphinema-tylospora	emb|LN829164.1	100	2.35e-83	97.83
OTU226	131_2698409|F|ITS2;size=7;	LT978588	AATCCTCAACCCTGTCCGTCGGTCGGGGCTTGGACTTTGGAGCGTGCTGGCGAAGGTTGGCTCCTCTTTAAATGCATCAGCGGAGAAAAACAAACCTTTTTTCCCCCTTCAGCGTGATAACTGCGTTGCGCTGTGGTCGCAAAAGGGTCCGCTCATAATCGTCCTCAGACAAACACTGAATCTG	Fungi	Basidiomycota	Agaricomycetes	Atheliales	Atheliaceae	Tylospora	amphinema-tylospora	gb|JQ991912.1	100	2.19e-83	97.83
OTU227	131_2711403|F|ITS2;size=390;	LT980323	AATTCTCAACCTTCCAGCTTTTATTAACCTGGTTAGGCTTGGATGTGGGGGTTGCGGGCTTCATTCATGAGGTCGGCTCCCCTTAAATGCATTAGCGGAACTTTTGTGGACCGTCTATTGGTGTGATAATTATCTACGCCGTGGATGTGAAGCAGCTTTATGAAGTTCAGCTTCTAACAGTCCATTGACTTGGACAATTTTGACA	Fungi	Basidiomycota	Agaricomycetes	Agaricales	Hydnangiaceae	Laccaria	laccaria	gb|FJ827221.1	100	2.32e-93	97.56
OTU228	131_2711831|F|ITS2;size=8408;	LT981040	AAGTTCTCAACCACACTTTGGTGTGGCTTGGATATGGAGGTTTTCTTGCGGGCTTCATTGACATGAAGTCGGCTCCTCTGAAATGCATTAGTGGTATCTGAGCAGAGAAAAACCTGGTGTGATAATTTATCTATGCCAATTAGTATGCTGCAATAGAACAGATTGTACTGCTTCTAACAAACTTATATTGAATA	Fungi	Basidiomycota	Agaricomycetes	Agaricales	Inocybaceae	_	inocybe	AB848519	71	1e-42	89.12
OTU229	132_2720130|F|ITS2;size=691;	LT978725	ACACCTCAACTCTCATGGTTTGCCATGATGAGCTTGGACTTTGGGGGTTTTGCTGGCCTGTGGTCGGCTCCTCTCAAACGAATCAGCCTGCCAGTGTTTGGTGGCATCACGAGTGTGATAACTATCTGCGCTTGTGGTTTTCCACCTGTTAACCTTTGGTGACGAAGGTTCGCTGGAGCTCATAAACGTCCCTCCTCTGCGAGGACAATTTTTTAAT	Fungi	Basidiomycota	Agaricomycetes	Thelephorales	Thelephoraceae	Tomentella	tomentella-thelephora	gb|HQ215814.1	95.39	1.83e-79	93.24
OTU230	133_2743176|F|ITS2;size=144;	LT980122	AATTCTCAACTGCCTTCTTAGCATTTATGTTGAGGGGGTGAAGTTGGAGTTGGAGGATAACTGCTGGCGCAACTCGGGTTGCTTGTTGGCTCCTCTTAAATGGATGAGCTTTTCTGATGGATCATGGCTCGGTAACACTAATGTGATAATTATCTACGTTAGATGTGAACGCCGTGAGCGGAGCGACTTTTTGAAGCTCCTACGGAAAAGGACGTCTTTTGACTTGTAACAAA	Fungi	Basidiomycota	Agaricomycetes	Thelephorales	Thelephoraceae	Pseudotomentella	pseudotomentella	EF619790	100	4e-118	99.57
OTU231	133_2743431|F|ITS2;size=24;	LT979501	TACTCTCACACTCCGATTTTATTTCAGATCGGGAGCGGTGGACTTGGATGTTGCTGCTTTGTTGTCAGGCTCATCTCAAATGCCTTAGTGCAACTCTACTTGGACATAGTACAGCGTGATAAGTATCTTCGCTGGCAACTCGCAAGAGAATGTCTACTTCGGAGCTCTGTGCTTCAAAAACTGTCCTTTTGACTATCTCTGACA	Fungi	Basidiomycota	Agaricomycetes	Sebacinales	Sebacinaceae	Sebacina	sebacina	gb|KF419117.1	100	4.8e-70	91.18
OTU232	133_2744059|F|ITS2;size=311;	LT979803	ATATCCTCAACCTTCTTGGTTTCTTGATCAAGAAGGCTTGGAATTTGGAGGCTTTTGCTGGCTTTCCTCTCAAAGCCAGCTCCTCTTAAATCAATTAGTAGGGTCTACTTTGCTGATCCTTGACGTGATAAGATTATTTTCTACGTCTTGGGCTTTTTGCAAACCTGCTTCTAACTGTCTCGTCAGAGACTGATATATAAAC	Fungi	Basidiomycota	Agaricomycetes	Russulales	Russulaceae	Russula	russula-lactarius	AB597671	96	9e-89	97.41
OTU233	133_2758388|F|ITS2;size=2789;	LT980354	GAACTTCTCAACCGCTCCAAATCTGTTTTGGATGCGGCTTGGAAATGGGGGAAGTGTTTTGCAGGCCTTTTGTGAAAGGTCTGCTCCCCTGAAATGCATTAGTGGGCGACTGCCACAGGTGTGATAACTGTCAACGCCTAGGCTATAAGCTGCCGCTTTCCAACCCTTTTGAAATGACCA	Fungi	Basidiomycota	Agaricomycetes	Agaricales	Inocybaceae	Inocybe	inocybe	JN129395	100	2e-90	100
OTU234	133_2759372|F|ITS2;size=2;	LT980774	CACCCCTCAAGCCTGGCTTGGTGTTGGGCGACGTCCTTTTTGAGGACGCGCTTCAAAACGTTCGGCGGCGTGGCACCGGCTTTAAGCGTAGCAGAATCTTTCGCTTCAAAAGTCGGGGCCCCGTCTGCCGGAAGACCTACTCGCAA	Fungi	Ascomycota	Dothideomycetes	Hysteriales	Gloniaceae	Cenococcum	cenococcum	AB769890	100	1e-61	95.89
OTU235	133_2763209|F|ITS2;size=9224;	LT979804	AATCATCAAAACCTTTTCTTTGATCCTTTTGGTCGAGAAAGGGATTTTGGACTTGGAGGATCAATGCTCGCTCTCACCTTTTGAAAGTGAGCTCCTCTCAAATAAATTAGTGGGGGTTTGCTTCGCCGATCCTTGACGTGATAAGTCGTTTCTACGTTTCGGATTCGGTTGGACACCCGCTTCTAACTGTCCTACGGACGATTGTGGTGTTCCGGTCACCTGGACCCATAAGAAAA	Fungi	Basidiomycota	Agaricomycetes	Russulales	Russulaceae	Russula	russula-lactarius	KF002752	100	8e-105	95.76
OTU236	134_2764629|F|ITS2;size=511;	LT981041	AATTCTCAACCATATCAAATTCTTTTTGACTTGGCTTGGTTATTGGAAGCCTGCAGGTCTTATTTTTATATGGGTCTGCTCTTCTGAAATGCATTAGTGGTGTCTGAGCAGAAGCTACTACAGATGTGATAATAATTTTTACATCTTGGTCAATGCTGCATGAGCAGATTATACTGCTTCTAAAAGTGAATGTATTATGATAA	Fungi	Basidiomycota	Agaricomycetes	Agaricales	Inocybaceae	_	inocybe	gb|JN168721.1	79.8	1.27e-46	89.02
OTU237	134_2765566|F|ITS2;size=8;	LT980958	AAACCTCGAACCCAAAGCGTCCTTCGATCCGTCGGAGCTTTGTTTTCGGACCATGGGAGCATGCGGGCGGCGACGTCGGCTCTCCTCAAAAGCATTAGCTGTGGGCGTCGAGCCTTGCGCGACACACGGCCTCGTTCGACGTCGTAAACGATCGTCGTGGGCTGGAGGCGCGCGCGGACGGACTAGTCCCATGCTTCGCAACCTTCTGCGGGACGACCGCACGTAACCAAG	Fungi	Basidiomycota	Agaricomycetes	Boletales	Sclerodermataceae	_	pisolithus-scleroderma	KP866131	100	1e-118	100
OTU238	134_2766792|F|ITS2;size=15;	LT980859	AATCCTCAACCCCGTCCGTCAGTCAGGGCTTGGACTTTGGAGCGTGCTGGTGAAGGTCAGCTCCTCTTTAAATGCATCAGCGGAGAAAAACAAACCTTTTTTCCCCCTTCAGCGTGATAACTGTGTTGCGCTGTGGTCGCGAAAGGGTCTGCTCATAATCGTCCTTGGACAAACACCGAATCTG	Fungi	Basidiomycota	Agaricomycetes	Atheliales	Atheliaceae	Amphinema	amphinema-tylospora	emb|LN829164.1	100	5.09e-80	96.74
OTU239	134_2773838|F|ITS2;size=4155;	LT978641	AATTCTCAACCTTTTCAACCTTTTTTGGTGGATCAGGAATTGGATGTGGGAGCTTGCAGGCTTGTTCAGAAGTCGGCTCTCCTTAAATGTATTAGTGGGACCTTTGTTAAGCCTAGCTTTGGTGTGATAATTATCTATGCCATTTGCTCAAGCAGTATACAATGAGGTCTTGCTTCTAATTGTCTCTCTTAGAGACACCTTCTGATA	Fungi	Basidiomycota	Agaricomycetes	Agaricales	Tricholomataceae	Tricholoma	tricholoma	UDB023524	99	1e-97	98.06
OTU240	134_2787283|F|ITS2;size=217;	LT980775	CACCACTCAAGCCTGGCTTGGTGTTGGGCGACGTCCCCCTAGGAGACGCGCCTCGAAACGCTCGGCGGCGTGGCACCGGCTTTAAGCGTAGCAGAATCTTTTCGCTTTGAAAGTCGGGGCCCCGTCTGCCGGAAGGCCTACTCGCAA	Fungi	Ascomycota	Dothideomycetes	Hysteriales	Gloniaceae	Cenococcum	cenococcum	AB571489	100	5e-65	97.28
OTU241	134_2790018|F|ITS2;size=823;	LT978726	ACACCTCAACTCTCATGGTTTGCTGTGATGAGCTTGGACTTTGGAGGCTTTGCTGGTCTTTGATCGGCTCCTCTTGAATGAATCAGCCTGCCAGTGTTTGGTGGCGTCGCAAGTGTGATAACTATCTACCCTTGAGAACGCCTGCCAGGTAACCTTCAGTGATGGAGGTTCGCTGGGGCTCATAGATGTCTCTCCTCAGTGAGGACAGCTTTTTTAAC	Fungi	Basidiomycota	Agaricomycetes	Thelephorales	Thelephoraceae	Tomentella	tomentella-thelephora	UDB018459	98	3e-74	90.19
OTU242	135_2808756|F|ITS2;size=299;	LT981209	CAAACCCGCTCATGTATATCATGGTCTTGATGGAAGTGAATTGAGACTACTACTCAAGTGTCTTGGTCACTCCGTTGAAATGCATAGGCAAGACAGCAAACCTAAAATATGGACTTAGTAACTGTTATGAAAACATAAACCAGTCCTTGCTAGGTTTGGGCCTGGCCTCTATGGACCTCCATCCAAGATGAAATCTG	Fungi	Ascomycota	Pezizomycetes	Pezizales	_	_	tuber-helvella	HE687179	100	3e-39	81.82
OTU243	137_2841307|F|ITS2;size=15;	LT981171	CAATCACTCAGGCCTCTACAGCCTGGCGTTGGGGCATCTACAGTTAAGCGTAGGCCCTGAAAGATAGTGGCGGTGTTCGCTAGCACTCCGGGCGCAGTACATTCCTTGTCGCCTAGGACGTCTTGCGGGCTGCCGGCCGTAAAACAGCCTGAAGCTTAGAA	Fungi	Ascomycota	Sordariomycetes	Sordariales	_	_	sordariales1	JN889970	98	9e-63	94.3
OTU244	138_2863685|F|ITS2;size=563;	LT978581	AATTCTCAACCATGTCTCTTCGTAGACATGGCTTGGACTTGGGGGTTGCTGGCCGCGAAGGTGGTCGGCTCTCCTGAAATGCATTAGCGACGGACAGCAAGTCTGACGTGCACGGCCTAGACGTGATAATGATCGTCGTCGCTGGAGCGTTGGACGAGCGCACACCAGTCTGTTCGCTTCCAATCCCCCCTCGACTTGGGCGAGCTCTAGCTACTAGTCGGTTTCACGACCGACGAACACAGGGCTGGCTTTTCGTCCCTCGACG	Fungi	Basidiomycota	Agaricomycetes	Boletales	Boletaceae	Xerocomellus	boletus	gb|EU569238.1	60.38	4.29e-50	90.06
OTU245	138_2864439|F|ITS2;size=3;	LT978727	ACACCTCAACTCTTCATGGTTTTTCTGTGATGAGCTTGGACTTTGGGGGTTTTGCTGGCCTATGGTCGGCTCCTCTAAAATGAATCAGCTTGCCAGTGTTTGGTGGGCATCACGGGTGTGATAAATATCTACGCTTGTGGTTTTCCACCAGGTAACCTTCAGCAATGGAGGTTCGCTGGAGCTCACAGATGTCTCTCCTCAGTAGAGACAACTTTTTGAAC	Fungi	Basidiomycota	Agaricomycetes	Thelephorales	Thelephoraceae	Tomentella	tomentella-thelephora	FJ378804	94	2e-96	97.58
OTU246	138_2865230|F|ITS2;size=2;	LT978728	ACACCTCAACTCTCATGGTTTGCCATGATGAGCTTGGACTCTGGGGGTTTTGCTGGCCTGCGGTCAGCTCCCCTCAAATGGATCAGCCTCCCAGTGTTTGGTGGCATCACAGGTGTGATAACTATCTACGCTTGCGATTGCCTGCCAGGTAACCTTTGGCAACAAAGGTTCGCTGGGGCTCACAGATGTCTCTCTTTGGAGGACGACCCTTTGAAT	Fungi	Basidiomycota	Agaricomycetes	Thelephorales	Thelephoraceae	Tomentella	tomentella-thelephora	gb|HM190003.1	89.81	3.06e-77	94.33
OTU247	138_2865238|F|ITS2;size=996;	LT980324	AATTCTCAACCTTCCAGCTTTTATTAGCTTGGTTAGGCTTGGATGTGGGGGTTGCAGGCTTCATTATTGAGGTCAGCTCTCCTTAAATGCATTAGCGGAACTTTTGTGGACCGTCTATTGGTGTGATAAATATCTATGCCGTGGATGTGAAGCAGTTTTATAAAGTTCAGCTTCTAATCGTTCATTGACTTGAACAATTTTATGACA	Fungi	Basidiomycota	Agaricomycetes	Agaricales	Hydnangiaceae	Laccaria	laccaria	UDB014203	100	2e-95	97.12
OTU248	138_2865318|F|ITS2;size=30;	LT980197	AATTCTCAACCATCCCTTTGATTGATTTCGAAGGGGTGGCTTGGATTTTGGGAGTTGCCGGACGACCCTCTGGGACGGTCGGCTCTCCTTAAAAGCATTAGCGAAAGGTGGCAAGCCCCTGCATGCACGGCCTTCGACGTGATAATGATCGTCGTGGCTGGAGTGCGAGAGAGGCATACGTCTACCTTTGCTTCTAAACATCGTACTGGGGACTTTGCTTCGGCGAACGAACCTTTACTTTCTGACG	Fungi	Basidiomycota	Agaricomycetes	Boletales	Melanogastraceae	Melanogaster	paxillus-gyrodon	gb|JN022499.1	100	3e-83	90
OTU249	138_2866328|F|ITS2;size=11;	LT980325	AATTCTCAACCTTCCAGCTTTTATTAGCTTGGTTAGGCTTGGATGTGGGGGTTGCAGGCTTATTAGCGGAATTTTTGTGGACCGTCTATTGGTGTGATAATTATCTACGCCGTGGATGTGAAGCAGTTTTATTAACTTCAGCTTCTAATCGTTCATTGACTTGAACAATTTTATGACA	Fungi	Basidiomycota	Agaricomycetes	Agaricales	Hydnangiaceae	Laccaria	laccaria	UDB014203	100	2e-45	94.87
OTU250	139_2893376|F|ITS2;size=2;	LT980557	ATATATATATATCAAGCCTTGCTCTTTGTTGAGTTGGTTTGGATGTGGGGGGAGGTTTTGCTGGCCTCTTGAAAAAGGGCTCAGCTCCTCTGAAATGTATTAGCAGAACAACCCTGTTCATTGGTGTGATAACTATCAATGCTATTGAATGCGAAAGGGGGCAGTTCAGCTTTCTAACAGTCCTTGGACAAAAATTCATTGTTA	Fungi	Basidiomycota	Agaricomycetes	Agaricales	Cortinariaceae	Cortinarius	cortinarius	GQ166908	91	6e-61	90.27
OTU251	139_2902755|F|ITS2;size=3001;	LT980498	AATTCTCAACCTTTATCGGCTTTTGCTGATGATGGCTTGGATATGGGGGTTTATTTTGCTGGCTTCTTTACAGATGGTCAGCTCCCCTTAAATGCATTAGCCGGTGCCCCGCGTGGACTGTCTATTGGTGTGATAATTATCTACGCCGTGGACATCTGCAATCATATGGGTTTGCACTGCTTCTAATCGTCTGTTCAATCAGACAATACATAACAA	Fungi	Basidiomycota	Agaricomycetes	Agaricales	Cortinariaceae	Hebeloma	hebeloma-alnicola	gb|FJ688105.1	100	8.22e-103	98.61
OTU252	14_288723|F|ITS2;size=8863;	LT979477	AACTCTCAAACAAGATAGATTTGTTTTTATCTCTGTTTGGATTTTGGGCTCTGCTGCATCAATGCAGCTGGCCTTAAATATATTAGCTGATCCTAATGAAAGTTTGGTTCTACTCAGCATGATAATTATCTGATGTTGAGGACAGTCTTTAGGGCTGGCCATGCTCTCTCTGGATTGCTTCTAATCGTCTTTGGACAATCATTCAAT	Fungi	Basidiomycota	Agaricomycetes	Cantharellales	Hydnaceae	Sistotrema	cantharellus	DQ273369	100	2e-81	93.24
OTU253	14_302826|F|ITS2;size=8056;	LT979805	TATCTTCAACCTTCTTGGTTTCTTGATCAAGAAGGCTTGGAATTTGGAGGCTTTTGCTGGCTTTTCCTCAAAGCCAGCTCCTCTTAAATGAATTAGTAGGGTCTACTTTGCTGATCCTTGACGTGATAAGATAACTTTCTACGTCTTGGGCTTTTGCAAACCTGCTTCTAACTGTCTCGTCAGAGACTGTGAACTATCATATATATATAAAC	Fungi	Basidiomycota	Agaricomycetes	Russulales	Russulaceae	Russula	russula-lactarius	AB597671	98	3e-98	98.08
OTU254	14_305676|F|ITS2;size=17054;	LT980232	AATCCTCAACCCTTCTCCCTTTTTTGGGTGGAAAGGGTTTGGAATTTGGAGGCTTTTGCTGGCCCCTTCTTTTGAAGCCAGCTCCTCTTAAACGCATTAGCAGGGTTTCCTTAGCCAGATCCCCTCGACGTGATAAAGTTTTTACGTCCCAGGGCCTCTCGGTTTTAACCTGCTTCCAATCGTCTCATCTGAGACTAAAACTGAATCTGA	Fungi	Basidiomycota	Agaricomycetes	Russulales	Russulaceae	Lactarius	russula-lactarius	gb|JQ991762.1	100	7.78e-103	99.52
OTU255	14_305863|F|ITS2;size=233;	LT979806	AATTCTCAAACCTTCTTGGTTTCTATGACTGAGAAGGCTTTGGACTTTGGAGGTCTTTTGCTGGCTTTGCGAAAAGTCAGCTCCTCTTAAATGTATTAGTGGGGTCCTCTTTGCGGGTCTTTAGACGTTGATAAGATGTTTCTACGTCTTGGGACTTGCTCTGTTTAATGGGAACTTGCTTCTAACCGTCTCACTATAAGGAGACACCGTTCGAGCTTTGCTCGACGCACGAA	Fungi	Basidiomycota	Agaricomycetes	Russulales	Russulaceae	Russula	russula-lactarius	AB291755	100	8e-120	100
OTU256	14_306408|F|ITS2;size=10667;	LT980719	AATTTCTCAAGCTTGGATGGCTTTTTTGTCTGTCCTTAGCCTTGGTTGTTGGGCTTTGCCGTGTCCTTTGTTGGGACGGCTGGCCTTAAAAGCATTAGCTGATCCTCGTGTGGCACTGGTTCTACTCAGCGTGATAACAGTCTGATCGCTGAGGACATCTTTTGGGATGGCCAGTTCTCATTTGGGTTGCTTCCAAACTTGGTTTTGCAGATTCTTCAATCTGTGTTCCACTTTTCAG	Fungi	Basidiomycota	Agaricomycetes	Cantharellales	Clavulinaceae	Clavulina	clavulina	gb|KM588766.1	100	4.81e-120	100
OTU257	14_308178|F|ITS2;size=511;	LT979807	TATCCTCAACCTTCTTGGTTTATTGATCAAGAAGGCTTGGAATTTGGAGGCTTTTGCTGGCTTTCTCTCAAAGCCAGCTCCTCTTAAATGAATTAGTAGGGTCTACTTTGCTGATCCTTGACGTGCTAAGATACTTTCTACGTCTTGTGTTTTTGCAAACCTGCTTCTAACTCATATATATATATATAAAC	Fungi	Basidiomycota	Agaricomycetes	Russulales	Russulaceae	Russula	russula-lactarius	gb|KP866128.1	90.05	8.12e-73	96.51
OTU258	14_308580|F|ITS2;size=33266;	LT979808	CATCCTCAAAACCTTCTTGGTTTCTTGACCGGGAAGGCTTTGGACTTTGGAGGCTTTTGCTGGCATTCCTTTATTGGAGCCAGCTCCTCTGAAATGAATTAGTGGGGTCCGCTTTGCTGATCCTTGACGTGATAATATCTTTTCTACGTCTTGGGTTTCGCACTGTTCACTCTGGATCCTGCTTCTAACCGTCTCACAGGAGACAATGGTCAAGTGATTGCCACTTTGACCCCATGAA	Fungi	Basidiomycota	Agaricomycetes	Russulales	Russulaceae	Russula	russula-lactarius	KM282282	100	3e-119	99.16
OTU259	14_310551|F|ITS2;size=79;	LT979809	CATTCTCAAACCTTCTTGGTTTCTTGACCGAGAAGGCTTTGGACTTTGGAGGCTTTTGCTGGACCTTCTCTCGTTGAAGCCAGCTCCTCTTAAATGAATTAGTGGGGTCTGCTTTGCTGATCCTTGACGTGATAAGATAGTTCTACTACGTCTTGGGTTTGGCACGGTTTGCTCTAGATCCTGCTTCTAACCGTCTTGTATAAGACAAAAGGTCGACTTGACCGACAAA	Fungi	Basidiomycota	Agaricomycetes	Russulales	Russulaceae	Russula	russula-lactarius	dbj|AB531460.1	100	4.62e-110	98.69
OTU260	14_310609|F|ITS2;size=14551;	LT979810	CATTCTCAAAAAACCCTTCTTTATCAAGAAAGGCTTTTTGGACTTTGGAGGTTATTGCTGGTCCCCCTTTGATAGCCAGCTCCTCTTAAATGGATTAGTAGGGACCACTTTGCAGACCCTAGACGTGATAAGATGTTTTCTACGTCTTGGGTTTTTGCTCTGTCCTTTGGAAACCTGCTTATAACCGTCTTGTGAAAAGACAAGCATTCGAGCCCTTCTCGTTGATCGGGGAAGGCTTGACTCTAAGAA	Fungi	Basidiomycota	Agaricomycetes	Russulales	Russulaceae	Russula	russula-lactarius	KJ705231	87	2e-91	94.91
OTU261	140_2906808|F|ITS2;size=3;	LT979811	AATTCTCAAAACCCTTCCTTTTTGGAAGGATTTTGGACTTGGAGGCCTTTTGCTGGTTTCGCCTTGAAGCGAGCTCCTCCTAAATGTATTAGTGGGGTCTGCATTGTCGGTCCTTGGCGTGATAAGTTGTTTCTACGTCTCGGATTTTTGGCGCTGTACACCTGCTTCTAACCGTCTCGCGAGAGACGACGCGTTTGAA	Fungi	Basidiomycota	Agaricomycetes	Russulales	Russulaceae	Russula	russula-lactarius	UDB013172	89	5e-76	95.53
OTU262	141_2949563|F|ITS2;size=97661;	LT979812	CATTCTCAAAAAGAACCCTTCTCGGTCTTGCGATCGGGAAAGGCCTCTTTTTGGACTTTGGAGGTTATTGCTGGTCCCCCCTTGATAGCCAGCTCCTCTTAAATGAATTAGTAGGGACCACTTTGCCGACCCTAGACGTGATAAGATGTTTCTGCGTCTTGGGTATTCGCTCTGTCCTTTGGAAACCTGCTTCTAACCGTCTTGTCAAAAGACAGCGTTCGAGCCTTTCTCGTTGATCGGGCAAGGCTTGACTTGACGAA	Fungi	Basidiomycota	Agaricomycetes	Russulales	Russulaceae	Russula	russula-lactarius	emb|LN910020.1	100	2.68e-132	100
OTU263	142_2966832|F|ITS2;size=8;	LT979813	AATTCTCAAAACCCTTCCTTCTTGGAAGGGTTTTGGACTTGGAGGCCTTTTGCTGGTTTCACCTTGAAGCGAGCTCCTCCTAAATGTATTAGTGGGGTCTGCATTGTCGGTCCTTGGCGTGATAAGTCGTTTCTACGTCTTGGATTTCGGGCGCTGTACACCTGCTTCTAACTGTCTAATCGACAATGATGGTGTTCTGGTCACCGCCGATTTTTCGGTGAGCGGCTTGACCCACAAAACGAA	Fungi	Basidiomycota	Agaricomycetes	Russulales	Russulaceae	Russula	russula-lactarius	UDB013172	98	5e-92	92.12
OTU264	142_2968177|F|ITS2;size=11;	LT979814	AATTCTCAAAACCCTCTTCTTTGTCTTTGACCGGAAGAGGAGTTTTGGACTTGGAGGTTTGATGCTCGCTTTCGCCTTTGAAAGCGAGCTCCTCTCAAATGAATTAGTGGGGTCCGCTTTGTCGATCCTCGACGTGATAAGATGTTTCTACGTTTTGGATTCGGCACTGTCTTTCGGAAGTCCGCTCCTAATCGTCCCATGGACAAACGATGGTGCTTCGGTCCGCCGCCGAATCTACGTCGGCGGGGGGCTTGGCCCACGACAAAAA	Fungi	Basidiomycota	Agaricomycetes	Russulales	Russulaceae	Russula	russula-lactarius	gb|JF834372.1	99.63	3.62e-101	92.54
OTU265	143_2978898|F|ITS2;size=3519;	LT978729	ACACCTCAACCCTCGTGGTTCGCCACGACGGGCTTGGACTTTGGAGGTTTTGCTGGCCCCCCTGTGGTCGGCTCCTCTCAAATGAATCAGCTTACCAGTGTTTGGTGGCGTCGCAGGTGTGATAACTATCTACGCTTGTGACCGTCTGCCATGCGACCTTCGGCGACGAGGGTTTGCTGGGGCTTACAGATGTCTTTCCCGAGTGAAGACAGCTTTTTGATC	Fungi	Basidiomycota	Agaricomycetes	Thelephorales	Thelephoraceae	Tomentella	tomentella-thelephora	gb|JQ991886.1	100	1.33e-85	93.24
OTU266	143_2983502|F|ITS2;size=12;	LT980965	AATTCTCAAAATCCTATTCTTTAATCGGAATGGGACTTTTGGACTTGGAGGTTCAATGCTTGCCTTTGCCTTTTGAAAGCAAGCTCCTCTCAAATAAATTAGTGGGGTCCGCTTTGCTGGTCCTTGACGTGATAAGATGTTTCTACGTTTTGGATTTGGCACTGTTTTCTGGACGTCTGCTCCTAACCGTCCGTCTCACGGACGACGATGGTGCTCCGGTCACCGCCCATCTTTGTGGGCAGGGAGGCTGGGCCCACGGAAAAAC	Fungi	Basidiomycota	Agaricomycetes	Russulales	Russulaceae	_	russula-lactarius	AY061692	97	6e-82	88.46
OTU267	143_3004751|F|ITS2;size=8816;	LT979815	AATTCTCAAAACCCCTTTTCTTCTGAAAAAGGTTTTTTGGACTTGGAGGTTCAATGCTCGCCTTCACTTTTGAAGGTGAGCTCCTCTCAAATGAATTAGTGGGGTCTGCTTTGCCGATCCTTGACGTGATAAAATGTTTCTACGTTTTGGATTTGGCACTGTCTCTTGGACACCTGCTCCTAACCGTCTCATGGACAAATGATGGTGCTTCGGTCACCGCCATTGGCGGGAGGCTGGGCCCACGGAAAAAC	Fungi	Basidiomycota	Agaricomycetes	Russulales	Russulaceae	Russula	russula-lactarius	emb|LN909843.1	100	1.27e-120	98.41
OTU268	144_3021385|F|ITS2;size=307;	LT980355	CAAGTTCTCAACCGCGCTTGCGGCTTGGAAGTGGATTTGCAGGTCTTTTATGTTCTGCTCCTCTAAAATGAATTAGTGGTGGTCTAATCCTACTAGTACAGGTGTGATAAAACTATCTATGCCTCTAGTATCCATGATACCGCTTCTAAATGATGAATAAGTTGGTGA	Fungi	Basidiomycota	Agaricomycetes	Agaricales	Inocybaceae	Inocybe	inocybe	UDB014146	100	7e-84	100
OTU269	145_3023192|F|ITS2;size=195;	LT980123	AATTCTCAACTGCCTTTTAGCATTTATGTTAAGGGTGAGGTTGGAGTTGGAGGATAATTGCTGGCGCAACTGAGGTTGCTTGTTGGCTCCTCTTGAATGGATGAGCTTTTCTGATGGGATCCATAGCTCAGTAACACTAATGTGATAATTATCTACGTTAGATGTGAAGAGGCTCCTACAGAAAAGGTGTATCTTGGGGATAACAAACCCTTGACTTTGACAA	Fungi	Basidiomycota	Agaricomycetes	Thelephorales	Thelephoraceae	Pseudotomentella	pseudotomentella	KM576611	100	2e-105	97.76
OTU270	146_3050869|F|ITS2;size=5;	LT979502	GTACTCTCACACTTCTCTGATCCTTTGGGTTTGAGGGGTGGTGGACTTGGGTGTTTGCTGCTTTCCTTGTGGCTCACCTCAAATGTGTTAGTGCACCTTTCAGTTGGACATAGTACGGCGTGATAAGTATCTTCGCCGGCACCTCGCAAGGGGGTGGCTAATTGGGAGCTATGTGCTTTCAAACTGTCTTTGGACAATCTCTGACA	Fungi	Basidiomycota	Agaricomycetes	Sebacinales	Sebacinaceae	Sebacina	sebacina	AB848597	100	1e-92	96.6
OTU271	147_3064645|F|ITS2;size=62;	LT980558	ATATATCAACCTCTTCAGATTTTGTCTGTGGAGTGTTTGGATGTTGGGGGTTTTTCTTTTGTGCGGGCCCCTTTCCTGAGGTCAGCTCCCCTGAAATGCATTAGCAGAACGATTTGGTTGATCTTGTTCATTGGTGTGATAACTGTCTACGCTATTGACATGAAGCAACCAAGTTCGGCTTCTAACTGCGCCATTCATTGCATTGGACAAATTTTCATTA	Fungi	Basidiomycota	Agaricomycetes	Agaricales	Cortinariaceae	Cortinarius	cortinarius	UDB013283	100	2e-95	95.5
OTU272	147_3066556|F|ITS2;size=28;	LT978730	ACACCTCAACTCCTCATGGCTTGCCATGATGAGCTTGGACTTTGGGGGACTTGCTGGCCTGCAGTCAGCTCCTCTCAAATGAATCAGCTTGCCAGTATTTGGTGGCACCACAGGTGTGATAAACATCTACTCTTGTGGTCCTCCACCATGTAACCTTCAGTGATGGAGGTTTGCTGGAGCTCACAAATGTCTCTCCTCAGTGGGGATGACCCTTTGAAT	Fungi	Basidiomycota	Agaricomycetes	Thelephorales	Thelephoraceae	Tomentella	tomentella-thelephora	emb|FR852132.1	92.24	4.79e-85	95.57
OTU273	147_3067721|F|ITS2;size=11;	LT979503	GTACTCTCACACTCCCGATCTTTGGATAGGGAGTGGTGGACTTGGGTGTTGCTGCTTCGCTGTGGCTCACCTCAAATGGATTAGTGCAACTCTTGGTTGGACATAGTACGGCGTGATAAGTGTCTTCGCCGGCACCTCCTAATCGAGGGTGGCCGATCGGGAGCTCTGTGCTTCAAACCGTCTTCGGACACTTTCTGACA	Fungi	Basidiomycota	Agaricomycetes	Sebacinales	Sebacinaceae	Sebacina	sebacina	emb|LN910194.1	99.5	4.74e-80	94.47
OTU274	147_3069641|F|ITS2;size=132;	LT978731	ACACCTCAACTCTTCATGGTTTTCTGTGATGAGCTTGGACTTTGGGGGTTTTGCTGGCCTATGGTCGGCTCCTCTAAAATGAATCAGCTTGCCAGTGTTTGGTGGGCATCGCAGGTGTGATAACTATCTACGCTTGTGGTTTTCCCACCAGGTAACCTTAAGCAGTGGAGGTTCGCTGGAGCTCACAAATGTCTCTCCTCAGTGGGGATGACCCTTTGAAT	Fungi	Basidiomycota	Agaricomycetes	Thelephorales	Thelephoraceae	Tomentella	tomentella-thelephora	emb|FN565374.1	100	2.77e-97	96.38
OTU275	148_3084281|F|ITS2;size=269;	LT980559	ATATATCAACCTCTTCAGAGTGTTGGATGTGGGGGTCTCTTTGCTGGCCTTTCTGAAGTCAGCTCCCCTGAAATGCATTAGCAGAACAAATATGTGGACCTGTTCATTGGTGTGATAACTATCTACGCTATTGACGTGAAGCAGTTCAGCTACTAACAGTCCATTGACTTGGACAATATTCATTA	Fungi	Basidiomycota	Agaricomycetes	Agaricales	Cortinariaceae	Cortinarius	cortinarius	gb|KJ421053.1	90.81	6.37e-64	94.08
OTU276	148_3085217|F|ITS2;size=96;	LT979816	AATCATCAAAACCCTTTTTCTTTGATCCTCTTTTGGTCGGGAAAGGGATTTTTGGACTTGGAGGTTTTATGCTAGCTTTCAAGCTTTTGAAAGCGAGCTCCTCTCAAAAGAATTAGTGGGGTCCGCTTTGCTGATCCTCGACGTGATAAAGATGTTTCTACGTTTTGGTATTCGGCACTGTCTTTTTGGACGTCTGCTTATAACCGTCCCCCCGGACATGAAGATGGTGCTCCGGTCACTGCCATCTATAATTGGTGAGAGGCTGGACCCACAAGAAAAAA	Fungi	Basidiomycota	Agaricomycetes	Russulales	Russulaceae	Russula	russula-lactarius	gb|JQ991810.1	100	3.77e-111	93.26
OTU277	148_3085655|F|ITS2;size=5510;	LT979504	TGTACTCTCACACTCTCCAATCTTTTCGATGGGGAGCGGTGGACTTGGGTGTTGCTGCTTCACTGTGGCTCACCTCAAATGTGTTAGTGCAACTCCTTGGTTGGACATAGTACGGCATGATAAGTATCTTTGCCGGCACCTCACAAGAGGGTGGCCAATTGGGAGCTCTGTGCTTCAAACTGTCTTTGGACAATCTCCTGACA	Fungi	Basidiomycota	Agaricomycetes	Sebacinales	Sebacinaceae	Sebacina	sebacina	AB848591	100	7e-95	97.55
OTU278	148_3087398|F|ITS2;size=2;	LT978595	TACTCTCAACCATGTCTCGATTCGTTTCGAGGCATGGCTTGGATTTGGGAGCTTTGCCGGCCTCGCGGTCGACTCTCCTTAAATGCATTAGCGAATAGGTCGTGTCAGTGGGTCTGGCGGGCAATCAATAGCCTTTCGACGTGATAACAATCATATATCGGAGTCAAGGCTTGCGTGCCGGGTGTAAGACACATTCTCTGTTCGCTTCCAATCCCCAAACCTGCTTAGCTAGTAGTTGGTCGATTGATAGATCACCTTCGAACACAAAGGCAGGACCACCTTTTGACCA	Fungi	Basidiomycota	Agaricomycetes	Boletales	Boletaceae	Tylopilus	boletus	EU597078	100	1e-104	90.57
OTU279	149_3100531|F|ITS2;size=86;	LT981245	AGTTCTCAACCACACCATGTGATGTGGCTTGGATAATGGGGGGAAGTCTCCATTTTTGCAGGCTATAACAAAAGTCTGCTCCCCTGAAACACATTAGTGGTATCTGAGCAGAAGCTACTACAGACGTGATAGCTTGCATTTGTCCGTGTCTCTGCTGTGCTGCTTCTAATTCATGTATGATCATTTGACAA	Fungi	Basidiomycota	Agaricomycetes	Agaricales	_	_	inocybe	HQ650732	67.54	9e-27	82
OTU280	149_3104437|F|ITS2;size=2;	LT981246	AGTTCTCAACCACACCATGTGATGTGGCTTGGATATTGGGAGGGGAAGTCTCCATTTTTGCAGGCTACAATAAAAGTCTGCTCCCCTGAAACACATTAGTGGTATCTGAGCAGAAGCTACTACAGCTGTGATAGCTTGCATTTGTCCGTGTCTCTGCCATGCTGCTTCTAATTCATGTATGATCATTTGACAA	Fungi	Basidiomycota	Agaricomycetes	Agaricales	_	_	inocybe	HQ650732	67.88	5e-24	80
OTU281	15_312958|F|ITS2;size=22973;	LT979817	AATCATCAAAAACCATTTCTTTTATAGAAAAGGTTTTTGGACTTGGAGGTTTGATGCTTGCTTTTGTCTTTAAAAGCAAGCTCCTCTCAAATGAATTAGTGGGGTCTGCTTTGCTGATCCTTGACGTGATAAGATGTTTCTACGTTTTGGACTTGGCATCGTGCTGCCTGCTTCTAACTGTCTTACGGACAAATGATGGTGCTCCGGTCACCTGCCAATCCACATTGGTGGGAGGCTGGACCCACAAAAAGAAC	Fungi	Basidiomycota	Agaricomycetes	Russulales	Russulaceae	Russula	russula-lactarius	gb|JQ991818.1	100	5.81e-129	100
OTU282	15_332133|F|ITS2;size=31;	LT979818	CATCCTCAAACCTTCTTGGTTTCTTGACCGGGAAGGCTTTGGACTTTGGAGGCTTTTGCTGGCCTTCTCTTGTTGAAGCCAGCTCCTCTCAAATGAATTAGTGGGGTCTGCTTTGCTGATCCTTGACGTGATAAAATGCTTCTACGTCTTGGGTTAACTCTAGACTCTGCTTCTAACTGTCTTATAGAAGACAATGTTTGAGTGATTGCCACTCAACACACAAGC	Fungi	Basidiomycota	Agaricomycetes	Russulales	Russulaceae	Russula	russula-lactarius	KF318054	99	1e-78	90.63
OTU283	15_332363|F|ITS2;size=1385;	LT979819	ACATTCTTCAACCTTTCTTTAGTTTCTCAACTGGGAAAGGCTTGGACTTTGGGGGTTTTTCATTGCTGGCCTCTCTTGAAGCCAGCTCCTCCTAAATGGATTAGTGGGGTCTGCTTTGCTGATCCTTGACGTGATAAGATGTTTCTACGTCTTGGGTTTCGCACTGTTGCTTTAGACCTCGCTTCTAACCGTCTTGCATCCAAGACAGAGTTATGAA	Fungi	Basidiomycota	Agaricomycetes	Russulales	Russulaceae	Russula	russula-lactarius	KF002770	98	6e-86	93.87
OTU284	15_333040|F|ITS2;size=12199;	LT980844	CTTTTATCAACTCCCTTATCTTTATCGATAATCGAGCTTGGACTTGGAAGTTGCTGGCGTCCATTAACCATGTCAGCTCTTCTCAATTGCATTAGCAATCGCTTACAGTGCAAGTCAACTCCTTGACACACCAATTAGCCTTTGACATGGTAATCATAATCCCATCTGTCATAGTGAATTTTTGGTATTGCTCATCATTAGCATTGCTTCTAATCCTAATCCTAGCACTTAGTTACTAGTTGGCTCTAATCATCAGCTGACGAACACAAGTACTACTTTCCTTATC	Fungi	Basidiomycota	Agaricomycetes	Boletales	Boletaceae	Austroboletus	boletus	AB509830	100	3e-149	100
OTU285	15_338708|F|ITS2;size=38094;	LT979820	AATCCTCAAACCTTCTTGGTTTCTTGAACCAGGAAGGCTTTGGACTCTGGAGGTTCTTGCTGGCCTTACTTTGTTGAAGCCAGCTCCTCTAAAATGAATTAGTGGGATCTGCTTTGCGGATACTTGACGTGATAAGATATTTCTACGTCTTGGATCTCGCACTGTTCGCTCTGGATCCTGCTTCTAACCGTCTCATAGAAGACAATGGGTTAAGTGATTGCCACTTGGCCTACAAA	Fungi	Basidiomycota	Agaricomycetes	Russulales	Russulaceae	Russula	russula-lactarius	JX425405	100	2e-121	100
OTU286	15_339643|F|ITS2;size=6022;	LT978732	ACACCTCAACTCTCATGGCTTGCCATGATGAGCTTGGACTTTGGGGGTCTTGCTGGCCTGTGTGGTTGGCTCCCCTCAAATGAATCAGCTTGCCGGTGTTTGGTGGCGTCACAAGTGTGATAACTATCTACGCTTGTGGTTTCCCACCAGGTAACCTTCAGTGATGGAGGTTCGCTGGGGCTCATAAATGTCTTTTCCTCAGTAAAGACAGCTCTCTGAAC	Fungi	Basidiomycota	Agaricomycetes	Thelephorales	Thelephoraceae	Tomentella	tomentella-thelephora	gb|KR149773.1	100	1.01e-96	96.38
OTU287	15_339818|F|ITS2;size=920;	LT979821	TATTCTCAAAAACCTTTTTCTGCTTTTGCTGAAAAGGGTTTTTGGACTTGGAGGCTTTAATGCTTGCGTTTCACTTTTGAAAGGCAAGCTCCTCTCAAATAAATTAGTGGGGTCCGCTTTGCTGATCCTTGACGTGATAAGATGTTTCTACGTTTTGGATTTGGCATCGTCCCTTTGGATGCCTGCTTCTAACCGTCTCACGGAGACAACGATGGTGCTCTGGTCACGGCCAGACCCACGAAAGAAAA	Fungi	Basidiomycota	Agaricomycetes	Russulales	Russulaceae	Russula	russula-lactarius	UDB013349	87	8e-95	95.83
OTU288	150_3144530|F|ITS2;size=25;	LT979505	GTACTCTCACACTCTCCGATCGTTTGGATTTGGGGAGCGGTGGACTTGGGTGCTTGCTGCTTTCTTTGTGGCTCACCTCAAATGCGTCAGTGCATCTCTTGATTGTACATAGTACGGCGTGATAAGTGTCTTCGCCGGCGCCTCGTAAGAGGGTGGCCAATTGGGAGCTCTGTGCTTTCAAACCGTCTTCGGACACTATCTGACA	Fungi	Basidiomycota	Agaricomycetes	Sebacinales	Sebacinaceae	Sebacina	sebacina	KM576576	100	1e-87	95.12
OTU289	150_3149024|F|ITS2;size=302;	LT980499	AATTCTCAACCTTTATCACTTTTGCTGATAATGGCTTGGATATGGGGGTCTATTTTGCTGGCTTCTTTACGGATGGTCAGCTCCCCTTAAATGCATTAGCTGGTGCCCCGCGTGGACTGTCTATTGGTGTGATAATTATCTACGCCGTGGACATCTGCAATCATATGGGTTTGCACTGCTTCCAACCGTCTGTTCAATCAGACAATACATGACA	Fungi	Basidiomycota	Agaricomycetes	Agaricales	Cortinariaceae	Hebeloma	hebeloma-alnicola	dbj|AB211268.1	100	4.91e-105	99.53
OTU290	151_3153343|F|ITS2;size=339;	LT980720	AATTGTCAGGCTGTGATACTTTGTCTTCACGGAAAAGTCATCTCAGTTTGGTGTTGGGCTCTGCCGTGTTCTTTATTGGAACGGCTGGCCTTAAAAGCATTAGCTGACCTTAATGAGTGTTGGTTCTACTCAGTGTGATAATTATCTGACCGCTGAGGACATCCTCCGGGGTGGCCAATTCTCTTTTGGGTTGCTCCGAATTTGGTTTTACGGACTTGCGAGTCTGTTCCACTTCTAA	Fungi	Basidiomycota	Agaricomycetes	Cantharellales	Clavulinaceae	Clavulina	clavulina	gb|KR819038.1	50.42	2.16e-34	90.16
OTU291	151_3169088|F|ITS2;size=12317;	LT979822	AATTCTCAAAACCCCCTTTTCTTTGATCCTTTTTTGGGGTTTGGAAAAGGAGTTTTGGACTTGGAGGTTCAATGCTTGCCTTTCACTTTTGAAAGCGAGCTCCTCTCAAATAAATTAGTGGGGTCCGCTTTGCTGATCCTTAACGTGATAAGATGTTTCTACGTTTTGGATTTGGCACTGTCCTTTGGATGCCTGCTTCTAACTGTCTCGCGGACAATGATGGTGCTCCGGTCACTACCATTTATATTGGTGGAAGGCTGGACCCACAAAAATAAAA	Fungi	Basidiomycota	Agaricomycetes	Russulales	Russulaceae	Russula	russula-lactarius	KP226186	100	3e-144	100
OTU292	151_3175817|F|ITS2;size=2;	LT978733	ACACCTCAACTCCTCATGGCTTGCCATGATGAGCTTGGACTTTGGGGGACTTGCTGGCCTGCAGTCAGCTCCTCTCAAATGAATCAGCTTGCCAGTATTTGGTGGCACCACAGGTGTGATAAACATCTACTCTTGTGGTCCTCCACCATGTAACCTTCAGTGATGGAGGTTTGCTGGAGCTCACAGATGTCTCTCTTCGGAGGACGACCCTTTGAAT	Fungi	Basidiomycota	Agaricomycetes	Thelephorales	Thelephoraceae	Tomentella	tomentella-thelephora	gb|EF218820.1	99.08	6.54e-84	93.55
OTU293	152_3191100|F|ITS2;size=34314;	LT980326	AATTCTCAACCTTCCAACTTTTATTAGCTTGGTTAGGCTTGGATGTGGGGGTTGCAGGCTTCTATTAATGAGGTCAGCTCTCCTTAAATGCATTAGCGGAACTTTTGTGGACCGTCTATTGGTGTGATAATTATCTATGCCGTGGATGTGAAGCAGCTTTATGAAGTTCAGCTTCGAACCGTCCATTGACTTGGACAATTTTTTGACA	Fungi	Basidiomycota	Agaricomycetes	Agaricales	Hydnangiaceae	Laccaria	laccaria	JX504090	100	2e-96	96.63
OTU294	152_3198846|F|ITS2;size=984;	LT979506	GTACTCTCACACTCCCGATCGTTGGTTGGGAGCGGTGGACTTGGGTGTTGCTGCTTACCGTGGCTCACCTCAAATGGAGTAGTGCACCTCTCGGTTGGACATAGTACGGCGTGATAAGTGTTTCGCCGGCACCTCACTAGAGGGTGGCCGATCGGGAGCTCTGTGCTTCCAACCGTCCTCGGACAACAACTGACA	Fungi	Basidiomycota	Agaricomycetes	Sebacinales	Sebacinaceae	Sebacina	sebacina	JX630719	100	2e-89	96.95
OTU295	153_3200843|F|ITS2;size=5;	LT980327	AATTCTCAACCTTCCAGCTTTTATTAGCTTGGTTAGGCTTGGATGTGGGGGTTGCAGGCTTCATTATTGAGGTCAGCTCTCCTTAAATACATTAGCGGAACTTTTGTGGACCGTCTATTGGTGTGATAATTATCTACGCCGTGGATGTGAAGCAGCTTTATAAAGTTCAGCTTCTAACTGTCCATTGACTTGGACAATTATTTTTTGACA	Fungi	Basidiomycota	Agaricomycetes	Agaricales	Hydnangiaceae	Laccaria	laccaria	JX504160	95	1e-97	98.99
OTU296	153_3204096|F|ITS2;size=19;	LT980878	AATATCTCAACAAAAAGCTTGTGCTTTTGCATAGGATTCTTTTTGGACATTGGGAGTTGCTGGCTACTGTTAAAGTGGTTGGCTCTTCTGAAATGAATTAGTTGAGGAGCTTTGCACTCTATTGGTGTGATAGACTATCTATGCCATGAGATGCTTTTTAATGATCCTCTGCCTTCTAACTGTCTTTAATCGGACAACATGATAA	Fungi	Basidiomycota	Agaricomycetes	Agaricales	Amanitaceae	Amanita	amanita	JQ396457	100	1e-102	99.51
OTU297	153_3206542|F|ITS2;size=5;	LT980328	AATTCTCAACCTTTCCAGCTTTTATTAGCTTGGTTAGGCTTGGATGTGGGGGTTGCGGGCTTTATTAATTGAAGTCGGCTCTCCTTAAATGCATTAGCAGAACTTTTGTGGACTGTCTATTGGTGTGATAATTATCTACGCCGTGGATGTGAAGCAGCTTTATGAAGTTCAGCTTCTAATCGTCCATTGACTTGGACAATTTTATGACA	Fungi	Basidiomycota	Agaricomycetes	Agaricales	Hydnangiaceae	Laccaria	laccaria	gb|JX504130.1	100	2.34e-88	95.69
OTU298	153_3206576|F|ITS2;size=8;	LT980879	AACTATCAAAACACTTTTTCTTTTGTTGAGGTGTTTTGGACTCTGGGAGTGCTGGTCTCTTTTTGAGCCGGCTCTCCTCAAAAGCATTGCTTTGGAGACCATCAGCGTGATAATTTTGTTTATGCCGCTGGCTTCTCCTTCTGTCCC	Fungi	Basidiomycota	Agaricomycetes	Agaricales	Amanitaceae	Amanita	amanita	AB509788	100	2e-64	96.64
OTU299	154_3235779|F|ITS2;size=11783;	LT979823	AACCATCAAAAACCCTTTATTCTTCGATCCTCATTCGGTCGGGAAAAGGAGTTTTTGGACTTGGAGGTTCCATGCTCGCTTTCACTTTTGAAAGTGAGCTCCTCTTAAATGAATTAGTGGGGTCTGCTTTGCCGATCCTTGACGTGTTAAGATGTTTCTACGTTTTGGACTTGGCACTGTTCCTCGGGCCACCCGCTCCCAACCGTCCACTTGGACAACCATGGTGCTTCGGTCACCGCCATCTTACATCGGTGGTGGAAGGCTGGACCCATAGAAAAGAA	Fungi	Basidiomycota	Agaricomycetes	Russulales	Russulaceae	Russula	russula-lactarius	gb|JQ991789.1	100	2.65e-142	99.64
OTU300	156_3257933|F|ITS2;size=220;	LT978562	TTACTCTCAACCATGTCTTCGATTCGATTCGAGGCATGGCTTGGATTTGGGAGCTTGCCGGCCTTGTGGTCGACTCTCCTTAAATGCATTAGCGAAATGGGACGCGTCAGTGGGTCCGGCGGGCAATCGATAGCCTTTCGACGTGATAACGATCGTATGTCGGAGTCGAGGCTCGCGCGTCGGGCGTAAGACATGTTCTCTTTTGCTTCCAATCCCCAACCTGCTTTAGCTAGTAGTCGGTCGATCCGACCTTCGAACGCAAAGAGCAGACCATCGACCA	Fungi	Basidiomycota	Agaricomycetes	Boletales	Boletaceae	Xerocomus	boletus	AB509640	100	3e-130	96.8
OTU301	156_3258179|F|ITS2;size=420;	LT980880	AATTCTATCAAAACATACACTTGAGTGTGTTTTGGATTGTGGGAGTGTCTGCTGGGTTTCTGAGCCAGCTCTCCTGAAAGATATTAGCTGGGGGGATGTGCCTCGTCACTTCTGCTTTTTCATTGGTGTGATAGATGAATAAACTTATCTACGCCAGGAAAGCAGGTTGCAGGTGTGAAGCACTGTGATCTCTCTGCTCTCTAATTGACATTTGTCTGATA	Fungi	Basidiomycota	Agaricomycetes	Agaricales	Amanitaceae	Amanita	amanita	KJ146699	100	2e-85	92.21
OTU302	157_3301689|F|ITS2;size=45783;	LT979757	AAACCTCGGATCGAGACTTCGACCCCGTCGGAGATCGGTCTGGACTATGGGAGTCTGCGGGCGAAGCCTGGCTTCGTCGGCTCTCCTCAAAAGCATTAGCCGTGGGTGGCGAGCCTGGCATGGCACGGCCTCTTCGACGTCATAACGATCGTCGTGGGCTGGAAGTGCGCGGCTCGACGGACCCATGCTTCTCGAGTCTCGCGAGCCCGTCCCCCGAGACGGCCGCGCCCCATCGAA	Fungi	Basidiomycota	Agaricomycetes	Boletales	Sclerodermataceae	Scleroderma	pisolithus-scleroderma	JX434682	100	2e-120	99.58
OTU303	159_3334797|F|ITS2;size=451;	LT980817	AATTCTCAACCATGCCCTTGGGCATGGCTTGGACTTTGGGAGCCTTGCTGGCCTTTCGGTCAGCTCTCCTGAAATGCATTAGCGATGGGTGGGCAGTGACGTGCACGGCCTTCGACGTGATAATGATCGTCGTGGCTGGAGCGTCTTTATCTATCCTCGCTCACAATCTTCTACCAGCTTTGGGGGTTAGCTTTCGGCTACTAGTTCGGTCGCAAGACTTGACGAACGTCGGAGGCAAGACTTTCTTTTCTTGGCTGGTCGATTTCGAA	Fungi	Basidiomycota	Agaricomycetes	Boletales	Boletaceae	Boletus	boletus	KC579402	100	1e-103	92.31
OTU304	159_3334855|F|ITS2;size=99;	LT980233	AGTTCTCAACCTTCTTCATTCTTCTTGGGGAATGGCTTGGACTTTGGAGGCTTTTGCCGATCTGCTCTTGATCGAGTATCGGCTCCTCTTAAATGGATTAGTAGGGTTCCTTTTTAGCTGGTCCTCGACGTGATAAGTCTTTTCTACGTCTGGAACTTAGCTTATATGAGGCCTGCTTCTAATCGTCTCTCGAGACAAAATCAATTGTGATCTGAACCC	Fungi	Basidiomycota	Agaricomycetes	Russulales	Russulaceae	Lactarius	russula-lactarius	HQ318212	100	4e-112	100
OTU305	159_3344620|F|ITS2;size=36;	LT979824	AATCCTCAAAACCCCCCTTTCTTTCATCGGAACGGGGGATTTTGGACTTGGAGGCTCAATGCTTGCTTTCGCTTTCGAAAGCGAGCTCCTCTTAAATGAATCAGTGGGGTCCGCTTTGCCGATCCTTGACGTGATAAGATGTTTCTACGTTTTGGACATGGCACTGTTTTCTCCGCTCCTAACTGTCCCACGGACAACGATGGTGCTCCGGTCCCCTGCCATCTGGCGCGTGGCTGGACCCACAAAAAA	Fungi	Basidiomycota	Agaricomycetes	Russulales	Russulaceae	Russula	russula-lactarius	UDB011200	100	2e-96	92.16
OTU306	16_340424|F|ITS2;size=477;	LT980513	CCTCTCTCCAAGCCCTCCAGCTTGGGTGTTGGGCTGCCGTCCCCCTCCCGTGGCGGGGGTGGGACGGGCCTGAAAGACAACGGCGATGCGATGGTCAGCTCCCGAGCGTATGGGTTTATTTTCCCGCTCTACGGGTGTGATCGGCATCTGCCTCTGCCCTGCAGTGCTGACTCC	Fungi	Ascomycota	Eurotiomycetes	Eurotiales	Elaphomycetaceae	Elaphomyces	elaphomyces	emb|LN910104.1	100	8.01e-83	99.43
OTU307	16_340723|F|ITS2;size=65;	LT981160	AACTATCAAAACACACCTTCCTTGGGAGTGTTTTGGACTTTGGGAGTGTTTTGCTGGTCTGCTTGAGCCCGGCTCTCCTCAAAAGCATCATCAGATTTTGGAGACTGTCAGCGTGATAACCTTGTCTGCGTTGACTCTCCAATGACACATGCCC	Fungi	Basidiomycota	Agaricomycetes	Agaricales	Amanitaceae	_	amanita	KF017930	92	4e-41	88.03
OTU308	16_341664|F|ITS2;size=310;	LT980809	AATTCTCAACCTCGTCGTTTCGTTTCGAGGCGAGGCTTGGACTTGGAGCGTGCCGGTCCTTTCTTGGGTCGGCTCCTCTTTGAATGCATCAGCGGAGTCTTCTTTGGCTCGTGGCATCGGCGTGATAATCACGTTACGCTGTTGACCCGACGTCTCGGTCCGCTTACAGTGGTCTTCGGACAGCTTATGAAA	Fungi	Basidiomycota	Agaricomycetes	Atheliales	Atheliaceae	Byssocorticium	byssocorticium	UDB013179	99	9e-74	92.46
OTU309	16_342891|F|ITS2;size=23018;	LT979507	GTACTCTCACACTCTCCGATCCTCTGGATTTGGGGAGCGGTGGACTTGGGTGCTTGCTGCTTTCGTTGTGGCTCACCTCAAATGTGTCAGTGCATCTCTTGATTGGACATAGTACGGCGTGATAAGTGTCTTCGCCGGCACCTCATAAGAGGGTGGCCCATCGGGAGCTCTGTGCTTTCAAACCGTCTTCGGACAATTTCTGACA	Fungi	Basidiomycota	Agaricomycetes	Sebacinales	Sebacinaceae	Sebacina	sebacina	gb|JQ420941.1	100	1e-91	97.07
OTU310	16_343698|F|ITS2;size=287;	LT978734	ACACCTCAACTCTCATGGTTTGCCATGACGAGCTTGGACTTTGGGGGTCTTGCTGGCCTATGGTCAGCTCCTCTTAAACGAATCAGCCTGCCAGTGTTTGGTGGCGTCACAGGTGTGATAACTATCTACGCTTGTGGTTTCCCATCAGGTGACCTTCAGTGATGGAGGTTCGCGCTGGGGCTCATAAAGGTCTCTCCTCAGTGAGGACAGCTTTTGAAC	Fungi	Basidiomycota	Agaricomycetes	Thelephorales	Thelephoraceae	Tomentella	tomentella-thelephora	dbj|AB605659.1	100	7.78e-103	98.18
OTU311	16_356542|F|ITS2;size=34654;	LT978563	AATTCTCAACCATTCTCTTTAAGAGAGAGACATGGCTTGGAGTTGGGAGTTGCTGGCAAGGAACTGTCAGCTCTCCTTAAATATATTAGCGATCGAGTTGACTAGTCTCTGACATGCACGGCCTCTGACGTGATAATGATCGTCATGGCTGGAGTGTCTTTCCTGGACTATGTACACAGATGGCTTCTAATTTACATTTGGAAAGAAAGGGAAGAGTTTAGCTACTAGGCAGTCTAACTATTTAGGCTGGCGAACACAAGCTCGATCTTTCTTTCTCTATCTTCATTG	Fungi	Basidiomycota	Agaricomycetes	Boletales	Boletaceae	Xerocomus	boletus	JF273511	100	1e-148	99.65
OTU312	16_357746|F|ITS2;size=5534;	LT979825	AATTCTCAAACCTTCTTGGTTTTTATGACCAAGAAGGCTTTGGACTTTGGAGGTCTTTGCTGGCTTTGCAAAAAGCCAGCTCCTCTTAAATGCATTAGTGGGGTCCTCTTTGCCGGTCCTCAGGCGTTGATAAGATGTTTCTACGTCTTGGGATTTGCTCTGTTTATTGGGAACCTGCTTCTAACCGTCTCTCTATGAAGAGACATTGTTCGAGCCTTGCTCGACCCACGAA	Fungi	Basidiomycota	Agaricomycetes	Russulales	Russulaceae	Russula	russula-lactarius	gb|KM576559.1	100	7.89e-93	93.99
OTU313	16_359423|F|ITS2;size=60549;	LT980818	AATTCTCAACCATGTCTTGATTGATTTCAAGGGCCATGGCTTGGAGTTGGGATGTTGCTGGCAGTGAAATGCAGTCAGCTGTCCTGAAATATATTAGCCAAGGTGAACATGCAGGTCTGTATTGGACATGCACGGCCTTCGACGTGATAATGATCGTCGTGGCTGGAGTGTTCAGACATGCACACTAAGTGATCCTTGCTTCCAACTCTTAACATTGACCATTTTTGTGGGAGATGTTATCTTTGACA	Fungi	Basidiomycota	Agaricomycetes	Boletales	Boletaceae	Boletus	boletus	AB973752	100	4e-123	98.79
OTU314	16_360272|F|ITS2;size=7028;	LT978564	AATTCTCAACCATTTTCTCTTTAAGAGAGAGACATGGCTTGGAGTTGGGAGTTGCTGGCAGGGAACTGTCAGCTCTCCTTAAATATATTAGCGATTGAGTTGACTAGTCTTTGACATGCACGGCCTCTGACGTGATAATGATCGTCATGGCTGGAGTGTCTTTCCTGGACTATGTACACAGATAGCTTCTAATTTACATTTGGAAAGAAAGGGAAGAGTTTAGCTACTAGGCAGTCTAACTATTTAGGCTGGCGAACACAAACTTTGATCTTTCTTTTTCTATCTTCATTG	Fungi	Basidiomycota	Agaricomycetes	Boletales	Boletaceae	Xerocomus	boletus	JF273511	100	2e-132	96.22
OTU315	16_363577|F|ITS2;size=6765;	LT979826	ATACCCTTCAACCTTTCTTGGTTTCTCAACCAAGGAAGGCTTGGACTTTGGGGGTTATTGCTGGCCTCGGTCGAAGCCAGCTCCTCCTAAATGGATTAGTGGGGTCCACTTTGCTGATCCTTGACGTGATAAGATGTTTCTACGTCTTGGGTTTCGCACTGTTGCTTTGGACTCTGCTTCTAACCGTCTTACATTCAAGACAGAGTTTATGAA	Fungi	Basidiomycota	Agaricomycetes	Russulales	Russulaceae	Russula	russula-lactarius	HE814111	100	4e-102	98.12
OTU316	16_364742|F|ITS2;size=213;	LT978735	ACACCTCAACTCTCATGGTTTGCCATGCTGAGTTTGGACTCTGGGGGTCTTGCTGGCCTATGGTGGTCAGCTCCTCTCAAATAGATCAGCTTGCCAGTGTTTGGTGGTGATGCAGGTGTGATAACTATCTACGCTTGTGGCTCTCCACCAGGTAACTTTCAGTCATGGAAGTTCGCTGGAGCTAATAAATGTCTCTCCTCAGTGGAGACAGCTCTTTGAAT	Fungi	Basidiomycota	Agaricomycetes	Thelephorales	Thelephoraceae	Tomentella	tomentella-thelephora	dbj|LC013849.1	100	2.94e-107	99.1
OTU317	16_364988|F|ITS2;size=753;	LT980356	ATATCTCAACCATGCACGGAAGTGTCATGGCTTGGACTTGGGGGACGATGCAGGCTCCGACTCGGTCAGTCTGCTCCCCTGAAATACATGAGCGAAATAAAAAGGCCTCCTTGTTGGGTGTGATAGCTTTATCTGCATCCGAGGGGTCGTTTGTGTTCGCCGCTTTGGATCTCATTTTTG	Fungi	Basidiomycota	Agaricomycetes	Agaricales	Inocybaceae	Inocybe	inocybe	gb|EU563510.1	98.33	2.44e-58	90.61
OTU318	16_365308|F|ITS2;size=4153;	LT978736	ACACCTCAACCCTCATGGTTTACCATGGTGGGCTTGGACTTTGGGGGTCTTGCTGGACTGTAGTCAGCTCCCCTTAAATGAATCAGCTTGCCAGTGTCTGGTGGCATCACAGGTGTGATAATTATCTACGCTTGTGGTTTTACATCAGGTAACCTTCAGAGATGGGGGTTCACTGGGGCTCACAAAAAGGTCTCTCCTCAGTGAGGATGATGGCTCTTTGAAC	Fungi	Basidiomycota	Agaricomycetes	Thelephorales	Thelephoraceae	Tomentella	tomentella-thelephora	AB848651	100	3e-114	100
OTU319	16_365315|F|ITS2;size=7844;	LT980855	AAACCTCAACCTCCCTGGTTTCTTCTTGAGACCAAAGGAGGCTTGGACTTTGGAGGCCTTTGCTGGCGTCTCTGCCAGCTCCTCTCAAATGAATTAGTGGGGTCCTCTTTGCCGATCCTTGACATGTGATAAGATGCTTCCGTGTCTCGGTTTCTGGCTCTGTTGCTTTCGGGACCCGCTTCTAACCGTCTAGACCCTTGCGTTGAGACAACGTTCGAGCACGTCTCCCTTGTCGGGAAACGTTCTCGGCCTCACGAACA	Fungi	Basidiomycota	Agaricomycetes	Russulales	Russulaceae	Arcangeliella	russula-lactarius	emb|LN910988.1	100	2.83e-132	100
OTU320	16_365624|F|ITS2;size=709;	LT980234	AAATCTCAACCTTCTCGGTTTTCTTCTGGACACCGAAGGAGGCTTGGACTTTGGAGGCCTTTGCTGGCGTCTCTCTAGAGCCAGCTCCTCTTAAATGAATTAGCGGGGTCCTCTTTGCCGATCCTTGACATGTGATAAGATGTTTCCATGACTCGGTTTCTGGCTCTGTTGCATTTGGGACCTGCTTCTAACCGTCTCGACGAGACGATGTTTGGGAGTGTCTCCCTTCTCGGGAGACTCTCTCGACCCCACGAAC	Fungi	Basidiomycota	Agaricomycetes	Russulales	Russulaceae	Lactarius	russula-lactarius	KJ195661	100	1e-132	100
OTU321	16_366285|F|ITS2;size=933;	LT980235	AAATCTCAACCTTCTTGGTTTCTTCTGGACACCAAAGGAGGCTTGGACTTTGGAGGCCTTTGCTGGCGTCTCTCTCTTTTGAGAGCCAGCTCCTCTTAAACAAATTAGCAGGGTCCTCTTTGCCGATCCTTGACATGTGATAAGATGTTTCCATGACTTGGTTTCTGGCTCTGTTGCCTTTGGGACCCGCTTCTAACCGTCTCTGCGAGACAATGTTTGGGCGTGTCTCCCTTCTCGGGAGACTCTCTTGACCCCACGAAC	Fungi	Basidiomycota	Agaricomycetes	Russulales	Russulaceae	Lactarius	russula-lactarius	EF685073	100	2e-135	100
OTU322	16_366305|F|ITS2;size=383;	LT978737	ACACCTCAACTCTCATGGTCTGCCATGATGAGCTTGGACTTTGGGGGTCTTGCCGGCCTAGCGTCGGCTCCTCTCAAATGGATCAGCTTTCCAGTGTTTGGTGGCGTCACGGGTGTGATAATTATCTACGCTTGTGGTTTTCCGCCATGCAACCTTCAGCGATGGAGGTTCGCTGGAGCTCACAGATGTCTCTCCTTGGCGAGGACAGCTTTTTGAC	Fungi	Basidiomycota	Agaricomycetes	Thelephorales	Thelephoraceae	Tomentella	tomentella-thelephora	DQ974780	99	2e-100	97.22
OTU323	160_3351047|F|ITS2;size=529;	LT979827	CATCCTCAAACCTTCTTGGTTTCTTGACCGGGAAGGCTTTGGACTTTGGAGGCTTTTGCTGGCGTTCCTTTGTTGGAGCCAGCTCCTCTGAAATGAATTAGTGGGGTCTGCTTTGCTGATCCTTGACGTGATAAGATGTTTTCTACGTCTCGGGTTTTTTGCACTCCTGCTTCTAACCGTCTTCACAGAAGACAAATGGTCTGGTGATCGTCACTTGACCCACGAA	Fungi	Basidiomycota	Agaricomycetes	Russulales	Russulaceae	Russula	russula-lactarius	UDB013272	97	3e-94	95.05
OTU324	160_3351073|F|ITS2;size=86;	LT980207	AATCCTCAACCCTTCTCCCTTTTTTGGGGGGAGAAAGGGTTTGGAATTTGGAGGCTTTTGCTGGCCCCTTCTTTTGAAGCCAGCTCCTCTTAAATGCATTAGCAGGGTTTCCTTAAGCCAGATCCCCTCGACGTGATAAAGTTTTTACGTCCCAGGGCTTCTTGGTTCTAACCTGCTTCCGATCGTCTCATCTGAGACTAAAACCTAATCTGA	Fungi	Basidiomycota	Agaricomycetes	Russulales	Russulaceae	Lactifluus	russula-lactarius	HQ318286	100	5e-106	99.06
OTU325	160_3351861|F|ITS2;size=21;	LT980966	AATTCTCAAAAACCCTTTTCTTTGATTGGAAGGGGGCTTTTGGACTTGGAGGTTCCATGCTCGTCAAAGGTGAGCTCCTCTCAAATGAATTAGTGGGGGTCCGCTTTGTCGATCCTCGACGTGATAAGATGTTTCTACGTTTTGGATCTGGCACTGTCTTTCGGACTTTTGCTCCTAATCGTCCCCCATGGACAAACGATGGTGCTCCGGTCCGTTGCCAAACCTACGTTTGGCGGGGGGCTTGACCCACGACCAAAAA	Fungi	Basidiomycota	Agaricomycetes	Russulales	Russulaceae	_	russula-lactarius	JF834372	99	2e-72	86.14
OTU326	161_3369284|F|ITS2;size=77;	LT980860	AATCCTCAACCCCGTCTGTCGGTCGGGGCTTGGACTTTGGAGCGTGCTGGTGAAGGTCGGCTCCTCTTTAAATGCATCAGCGGAGAAAAACAAACCTTTTTTCCCCCTTCAGTGTGATAACTGCGTTGCGCTGTGGTCGTGAAAGGGTCCGCTCATAATCGTCCTCGGACAAACACCGAATCTG	Fungi	Basidiomycota	Agaricomycetes	Atheliales	Atheliaceae	Amphinema	amphinema-tylospora	emb|LN829164.1	100	1.09e-81	97.28
OTU327	161_3371219|F|ITS2;size=338;	LT979828	CATCCTCAAACCTTCTTGGTTTCTTGACCAAGAAGGCTTTGGACTTTGGAGGCTTTTGCTGGACCTTCCCTTGTTGAAGCCAGCTCCTCTTAAATGAATTAGTGGGGTCTGCTTTGCTGATCCTTGACATGATAAGATGCTTCTACGTCTTGGGTTTTGCACAGTTTGCTCTAGATCCTGCTTCTAACTGTCTCATAGAAGACAAATGGTCAACTTGACCTACAAA	Fungi	Basidiomycota	Agaricomycetes	Russulales	Russulaceae	Russula	russula-lactarius	AB769905	100	1e-107	97.79
OTU328	161_3374723|F|ITS2;size=114;	LT979829	CATCCTCAAACCTTCTTGGTTTCTTGACCAAGAAGGCTTTGGACTTTGGAGGCTTTTGCTGGACCTTCCCTTGTTGAAGCCAGCTCCTCTTAAATGAATTAGTGGGGTCTGCTTTGCTGATCCTTGACGTGATAAGATGCTTCTACGTCTTGGGTTTTGCACTGTTTGCTCTGGATCCTGCTTCTAACTGTCTCATAGAAGACAAATGGTCAACTTGACCCATCGAA	Fungi	Basidiomycota	Agaricomycetes	Russulales	Russulaceae	Russula	russula-lactarius	AB769905	98	4e-112	99.55
OTU329	161_3382994|F|ITS2;size=66;	LT979830	AATCATCAAAACCTTTTCTTTGATCCTTTTGGTCGAGAAAGGGATTTTGGACTTGGAGGTTCAATGCTCGCTGGGAAAGTGAGCTCCTCTCAAATAAATTAGTGGGGGTTTGCTTCGCCGATCCTTGACGTGATAAGTCGTTTCTACGTTTTGGATTTGGTTGGGCACCCGCTTCTAACTGTCCTACGGACGATTGTGGTGTTCCGGTCACCTGGACCCATAAGAAAA	Fungi	Basidiomycota	Agaricomycetes	Russulales	Russulaceae	Russula	russula-lactarius	KF002752	100	6e-86	91.53
OTU330	162_3401025|F|ITS2;size=69;	LT980959	AAACCTCGAAACCGAGCGTCGACCTAGTCGGAGCCCGGTTCGGACTATGGGAGTCTGCGGGCGAACCACGTCCGCTCTCCTCAAAAGCATTAGCCGTGGGCAAGGGCCTCGCATGGCACGGCCTCTTCGACGTCGTAATGATCGTCGTGGGCTGGAAGTGCGTCGCTCCATGGCCCCGTGCTTCCTTAGACTGGCGAGCCCGTTCGTAGGAACGGCCGCGCCGCATCGAC	Fungi	Basidiomycota	Agaricomycetes	Boletales	Sclerodermataceae	_	pisolithus-scleroderma	JQ991830	100	2e-111	98.26
OTU331	163_3409983|F|ITS2;size=2;	LT980861	AATCCTCAACCCCGTCCGTCGGTCGGGGCTTGGACTTTGGAGCGTGCTGACGAAGGTTGGCTCCTCTTTAAATGCATCAGCGGAGAAAAACAAACCTTTTTTCCCCCTTCAGCGTGATAACTGTGTTGCGCTGTGGTTGCAAAAGGGTCCGCTCATAATCGTCCTCGGACAAACACCGAATCTG	Fungi	Basidiomycota	Agaricomycetes	Atheliales	Atheliaceae	Amphinema	amphinema-tylospora	emb|LN829164.1	100	2.35e-83	97.83
OTU332	163_3410344|F|ITS2;size=30;	LT979508	GTACTCTCACACTCCCGATCTTGTTGGGAGCGGTGGACTTGGGTGTTGCTGCTTACCGTGGCTCGCCTCAAATGGATTCGTGCATCTCTTGGTTGGACATAGTACGGCGTGATAAGTGTCTTCGCCGGCGCCTCACTTAGAGGGTGGCCGATCGGGAGCTCTGTGCTTCTAACCGTCCTCGGACAACAACTGACA	Fungi	Basidiomycota	Agaricomycetes	Sebacinales	Sebacinaceae	Sebacina	sebacina	JQ665490	100	8e-94	98.47
OTU333	163_3428420|F|ITS2;size=332;	LT979476	AAAACCACTCAAGCATGTTTGCTTGGACTTGGAGGAAGAGCGCGCCCTTGTGGCGGGTTCCCCTCTGAAATATAATGGCGGATGGTCCACGTGGACACCGACGTAGTAAGAGCAATCTCTCGTCGTGGCCCTGTATCATCCCGCCCTCAATCCCCAATAACAATCAT	Fungi	Ascomycota	Pezizomycetes	Pezizales	Pyronemataceae	Sphaerosporella	sphaerosporella	HM164581	100	2e-65	93.49
OTU334	165_3450213|F|ITS2;size=26;	LT978584	AATACCTCTCAAGCAAATTTGCTTGGTCGTGGAAGATGAGTATGCTTGCATTCTCACTTCTGAAATTCAAAGGCGGATGATCTCATATCCCCAGGTGTAGTAAGTTAATCTTTTCGCTTGGTGCATGCGATTGTCCTGCCGTTGACCCCCATGTTTTCAA	Fungi	Ascomycota	Pezizomycetes	Pezizales	Pyronemataceae	Wilcoxina	wilcoxina	AB250949	100	9e-78	99.38
OTU335	165_3451653|F|ITS2;size=15;	LT980776	CACCACTCAAGCACGGCTTGGTGTTGGGCGACGTCCCTCCTTGGGGACGCGCCTCGAAACGCTCGGCGGCGTGGCACCGGCTTTAAGCGTAGCAGAATCTTTCGCTTTGGAAGTCGGGGCCCCGTCTGCCGGAAGACCTACCATCAA	Fungi	Ascomycota	Dothideomycetes	Hysteriales	Gloniaceae	Cenococcum	cenococcum	dbj|AB986319.2	100	1.87e-64	97.97
OTU336	165_3452584|F|ITS2;size=6357;	LT979509	GTACTCTCACACTCTCTGATTCTTTGGATTTGGGGAGTGGTGGACTTGGGTGTTTGCTGCTTTCCTTGTGGCTCACCTCAAATAGGTCAGTACACCTCTTAGTTGGACATAGTACGGCGTGATAAGTGTCTTCGCCGGCACCTTGCAATAGGGTGTCTGATTGGGAGCTCTGTGCTTCAAACTGTCTTTGGACAACATCTGACA	Fungi	Basidiomycota	Agaricomycetes	Sebacinales	Sebacinaceae	Sebacina	sebacina	gb|KF000482.1	100	2.22e-73	91.79
OTU337	165_3464768|F|ITS2;size=2145;	LT980721	AATCCTCAAGCTTGGGGTGGTTTTTTCATCCTAAGCTTGGTAATTGGGCTCTGCTGTTCGTTTGATTGGAACAGCTGGCCTTAAAATCATTAGCTGATCCTAATGGTTGTGGTGTTGGTTTTTACTCAGCGTGATAATGAATCTGACCGCTGGGGGGAAATATCTTTCGGGATGGCCAATTCTCAATCTTGGGTTGCTTCTAATTTGGCTTTTACGCATAGCATATTCTG	Fungi	Basidiomycota	Agaricomycetes	Cantharellales	Clavulinaceae	Clavulina	clavulina	HM105503	95	6e-91	94.17
OTU338	166_3490107|F|ITS2;size=10;	LT980560	ATATAATCAAACTTCTCTTGTCGAGTTGTTTGGATGTGGGGGTTTTGCTGGCCTCTTGAAAAGGGGTCAGCACTCCTGAAATGCATTAGCAGAAACAACCTGTTGTTCATTGGCGTGATAACTATCTATGCTATTGAATCTGAAGGGAGGTTCAGCTTTCTAACAGTCTTGGGACAAATTCATCATTA	Fungi	Basidiomycota	Agaricomycetes	Agaricales	Cortinariaceae	Cortinarius	cortinarius	AB701404	100	6e-75	93.68
OTU339	167_3492080|F|ITS2;size=9;	LT979831	CATTCTCAAACCTTCTTGGTTTCTTGACTAAGAAGGCTTTGGACTTTGGAGGCTTTTGCTGGACCTTCCCTTGTTGAAGCCAGCTCCTCTTAAATGAATTAATGGGGTCTGCTTTGCTGATCCTTGACATGATAAGATGCTTCTACGTCTTGGGTTTTGCATGGTTTATTCTAGATCCTGCTTCTAATCGTCTTGTAGAAGACAAATGGTCAACTTGACCCACAAA	Fungi	Basidiomycota	Agaricomycetes	Russulales	Russulaceae	Russula	russula-lactarius	KP071170	100	1e-107	97.79
OTU340	167_3493473|F|ITS2;size=9;	LT980329	AATTCTCAACCTTTCCAGCTTTTATCAGTTTGGTCAGGCTTGGATGTGGGGGTTGCAGGCTTCATTTACTTTATGAGCTCTGCTCTCCTTAAATGCATTAGCGGAACTTTTGTGGACCGTCTATTGGTGTGATAATTATCTACGCCGTGGATGTGAAGCAGCTTTATGAAGTTCAGCTTCTAATCGTCCATTGATTTGGACAATTTTATGACA	Fungi	Basidiomycota	Agaricomycetes	Agaricales	Hydnangiaceae	Laccaria	laccaria	GQ240911	97	4e-92	96.14
OTU341	167_3502637|F|ITS2;size=40;	LT979832	AATTCTCAAAACCCATTTCTTTTGGTCAAAAATGACCATGGAAAGGATTTTGGACTTGGAGGCCTTTTGCTGGTTTCACCTTGAAGCGAGCTCCTCCCAAATGTATTAGTGGGGTCTGCATTGTCGGTCCTTGGCGTGATAAGTTGTTTCTACGTCTTGGATCTTTTGGCGCTGTCCCCCTGCTTCTACCCGTCTCATTGACAACGAGGGTTTCCCGGTCACCGCCGATTTATCGGTGGGAGGCTTGACCCACAAAACAAA	Fungi	Basidiomycota	Agaricomycetes	Russulales	Russulaceae	Russula	russula-lactarius	UDB018434	100	9e-110	94.25
OTU342	168_3517149|F|ITS2;size=43;	LT980198	AATTCTCAACCATCCTTTGATTGATTTCGAGGGGTGGCTTGGATTTTGGGAGTTGCTGGCTGACCCCCTTGGGTGGGGGACTGGTCGGCTCTCCTTAAAAGCATTAGCGAAAGGTGGCAAGCCCTGCATGTACGGCCTTCGGCGTGATAATGATCGTCGTGGCTGGAGTGCGAGGCATGAATCTAAACCCTTTGCTTCTAAACGTTCGTACTGGGGACTTTGCTTCGGCGGACGAACCTTTACTTTCTGACG	Fungi	Basidiomycota	Agaricomycetes	Boletales	Melanogastraceae	Melanogaster	paxillus-gyrodon	gb|EU726296.1	70.24	5.8e-60	91.53
OTU343	169_3523611|F|ITS2;size=6;	LT980881	AATTTTGTCAAAACATGCAGCTAGTGTGTTTTGGATTGTTGGGAGCTTTTGCTGAACTTGTTTCAGCTCTCCTGAAAAAGATTAAACTGGTTAGGGGAGATGGTGGCTCTATTCACTTCTGCCTTTCCATTGGTGTGGTAGATGAATGAAAAATTCACTGTGCCAGGAAAAGCAGGGTTTATAAGTGAAGGAAAAAGAGTACTATGGAACTCTCTGCTCATTATTGAGAACTTGGTTGTATTG	Fungi	Basidiomycota	Agaricomycetes	Agaricales	Amanitaceae	Amanita	amanita	FJ441036	99	6e-101	93.93
OTU344	169_3527443|F|ITS2;size=615;	LT978738	ACACCTCAACCCTCATGGTTTGCCATGATGGGCTTGGACTTTGGAGGTTTTGCGGGCTTATGGCCAGCTCCTCTCAAAAAATTAGCTTACCAGTGTATGGTGGCATCATGGGTGTGATAATTATCTGCGCTTGTGGTTGTCTGCCAGGTAACCTTCAACCTTGGAGGTTTGCTGGGGCTTATAAATGTCTCTCCTCAGTGAAGACATCTTTCTGAAC	Fungi	Basidiomycota	Agaricomycetes	Thelephorales	Thelephoraceae	Tomentella	tomentella-thelephora	gb|JQ991890.1	73.27	8.18e-68	96.88
OTU345	169_3527784|F|ITS2;size=15;	LT980986	AATCCCCTCAGGTTTGGATTATTCCACTCCCTGGTGTTGAGTTCGGAGCATGAGTGCACTGTTCCTGCTCGAAATAGAACGGCGCAACGGATTGTCAATTCTGTGTAATAAGCCTTCCACTTCACAAATTGATCTATCCGTCTTGCGGATCCGACACATACACTCCTCGTAC	Fungi	Ascomycota	Pezizomycetes	Pezizales	Pyronemataceae	_	pyronemataceae1	GQ240939	100	1e-82	98.84
OTU346	17_367552|F|ITS2;size=7959;	LT978739	ACATCTCAACTCTCATGGCTTGCCGTGATGAGCTTGGACTTTGGGGGTCTTGCTGGCCTGTGGTCAGCTCCTCTCAAATGAATTAGCCTGCCGGTGTTTGGTGGGATCACAGGTGTGATAACTATCTACGCTTGTGGTTTTCCACCAGGTAACCCTCAGCAATGGAGGTTCACCGGAGCTTACAAATGTCTCTCCCCAGCGAGGACAGATTTTGACC	Fungi	Basidiomycota	Agaricomycetes	Thelephorales	Thelephoraceae	Tomentella	tomentella-thelephora	gb|KC702624.1	100	1e-106	99.54
OTU347	17_373203|F|ITS2;size=20643;	LT979833	AATTCTCAAACCTTCTTGGTTTCTTGATCAAGATGGCTTTGGACTTTGGAGGCATTTGCTGGCTTTGCGAAAAGCCAGCTCCTCTTAAATGCATTAGTGGGGTCCCCTTTGCCGATCCCCAGGCGTGATAAGATGTTTCTACGTCTTGGGATTTGCTCTGTTCCTTGGGAACCTGCCTCTAACCGTCTCATGGAAGACATTGTTCGAGCTTGCTCGACCCACGAA	Fungi	Basidiomycota	Agaricomycetes	Russulales	Russulaceae	Russula	russula-lactarius	KM576561	100	1e-113	99.56
OTU348	17_380153|F|ITS2;size=2893;	LT980236	AAATCTCAACCTCCTCGGTTTCTTTTGGATGCCAAAGGAGGCTTGGACTTTGGAGGGCTTTGCTGGACTTTGAAAGGCCAGCTCCTCTCAAATGGATTAGCGAGGTTCCCTTTGCCGATCCTCGACGTGTGATAAGATGCTTCCACGTCTTGGTCTTTGGCTCTGTCGCCTTTTGGGACCTGCTTCCAATCGTCTCTTGACGAGACAACGTTCGAGCACGTCTCGACCACGTAC	Fungi	Basidiomycota	Agaricomycetes	Russulales	Russulaceae	Lactarius	russula-lactarius	JQ446104	100	1e-113	98.3
OTU349	17_382021|F|ITS2;size=48255;	LT981141	AATTCTCAACCATGTCTTTTGTCGACATGGCTTGGACTTGGGGGTTGCTGGCAGCGAAAGCGGTCGGCTCTCCTGAAATGCATTAGCGACGGACTGCAAGTCTGACGTGCACGGCCTAGACGTGATAATGATCGTCGCCGCTGGAGCGTCCGGACGAGCGACACACAAAGTCTGTTTGCTTCCAATTCCCCTTTGACTTGGGACTTTCGAGCCAAGCCTAGCTACTAGTCACCGACGAACGCAGGCAAGGCTTTTTCGTCCCTCGTCTTCATCGACG	Fungi	Basidiomycota	Agaricomycetes	Boletales	Boletaceae	_	boletus	EF173307	79	2e-57	85.4
OTU350	17_384138|F|ITS2;size=230;	LT978740	ACACCTCAACTCCCATGGTTCGCCATGGTGAGCTTGGACTTTGGGGGTTTTGCTGGCCTACGGTCAGCTCCTCTCAAATGAATTAGCCCGCCAGTGGTTGGTGGCATCACAGGTGTGATAAATATCTACGCTTGCGATTGCCCACCAGGTAACCTTCAGCAATGGGGGTTCACTGGGGCTCATAGACGTCTCTCCCTCAGCGAGGACAATTCTTTAAC	Fungi	Basidiomycota	Agaricomycetes	Thelephorales	Thelephoraceae	Tomentella	tomentella-thelephora	emb|LN909568.1	100	6.1e-94	95.87
OTU351	17_386638|F|ITS2;size=12287;	LT979510	GTACTCTCACACTTCCGATCCTTTGGTGGATCGGGAGCGGTGGACTTGGGTGTTGCTGCTTTACTGTGGCTCACCTCAAATGCATTCGTGCACCTCCTGGTTGGACATAGTACGGCGTGATAAGTGTCTTCGCCGGCACCTCGTTAAGAGGGTGGCCGATCGGGAGCTCTGTGCTTCAAACCGTCTTCGGACAACAACTGACA	Fungi	Basidiomycota	Agaricomycetes	Sebacinales	Sebacinaceae	Sebacina	sebacina	HQ021796	100	7e-100	99.01
OTU352	171_3551170|F|ITS2;size=1961;	LT979834	AATTCTCAAAACCCTTTCTTTGGTCTCTCGATCGGGGGAAGGATTTTGGACTTGGAGGCCTTTTGCTGGTTTCACCTCGAAGCGAGCTCCTCCCAAATGAATTAGTGGGGTCTGCTTTGCCGATCCTTGGCGTGATAAGTCATTTCTACGTCTTGGGTTTTTGGCACTGTACACCTGCTTCCAACCGTCTCATTGACAAACGATGGTGTTCCGGTCGCCGCCGATTCGTCGGTGGGAGGCTTGACCCACGAAATGAAC	Fungi	Basidiomycota	Agaricomycetes	Russulales	Russulaceae	Russula	russula-lactarius	JQ396469	100	9e-115	95.74
OTU353	171_3551616|F|ITS2;size=6870;	LT981106	ACATTCTCAAGCTGGATGCTTTTTTCCTTTAAAAAGTTCTTAGCTTGGTTTTGGGCTTTGCAGTGCCCCCTTCATCGGGGAACTGCTGGCCTTAAAAGTATTAGCTGGCCCTCATGTGGGATTGGTTCTACTCAGCGTGATAATAGTGACTGCTGAGGACATCTTTCGGGATGGCCAAGTTCTATTTAGGGGTTGCTTCTAATCCGTGGCCTGCAGGTTCTTTGAATCTGTTCCACACAATCACAA	Fungi	Basidiomycota	Agaricomycetes	Cantharellales	Clavulinaceae	_	clavulina	FJ454901	97	4e-68	86.18
OTU354	172_3579240|F|ITS2;size=71;	LT980967	AATCCTCAAAACCTTTTTCATTCGACCCTTTGGTCCAGGAAAAGGATTTTGGACTTGGAGGTTTTATGCTCGCTTTCACTTTTGAAAAGCAAGCTCCTCTCAAATGAATTAGTAGGGTCCGCATTGCTGAACCTTGACGTGATAAGATGCTTCTACGTTTTGGATTCAACATTGTCCCCGCTTCTAACCGTCTCATGGACGACGATGGTGCTTTGGTCACCGCCACCTTACATACGTTGGCGGGAGGCTGGACCCACAAAAAC	Fungi	Basidiomycota	Agaricomycetes	Russulales	Russulaceae	_	russula-lactarius	JX434675	99	3e-74	86.42
OTU355	173_3585150|F|ITS2;size=119;	LT980561	ATATTATATATCAAACCCTCTTTTTGATGGAGTGGTTTGGAATGTGGAGGGAATGTGTTTGCTGGCCTCTTGAAGGGGGGTCAGCTCCTCTGAAATGCATTAGTGGGACAGCTTGTTTGTTCATTGGTGTGATAAACTATCTACGTCATTGAGCTAAAGCTTTCCTTGCCCTCTTTTTTGGGGCAGTTTATTGTCATTC	Fungi	Basidiomycota	Agaricomycetes	Agaricales	Cortinariaceae	Cortinarius	cortinarius	KM226512	88.94	1e-57	90
OTU356	173_3585171|F|ITS2;size=139;	LT978602	AAAACCTTCTCACAGAAAATGTGGTATTGGTAGAAGTGGGTAGTACTAACAAATAGTACTTTGTCTTACTCTACTGAAATGAATAGGCCAGTAAAGTGGACCATGGTTGTAGACTCTAGGAGTATTGTAAAATGCTAAACTAGTCTTCACCAGGTGTAGATCCTGAGCTAAATGGACACCCCCTTTAGTCCAAATCAGAGA	Fungi	Ascomycota	Pezizomycetes	Pezizales	Tuberaceae	Tuber	tuber-helvella	DQ898187	100	2e-95	98.01
OTU357	173_3602788|F|ITS2;size=59209;	LT979511	GTACTCTCACACTCCCTAATCCTTTGGATTTGGGGAGCGGTGGACTTGGGTGCTTGCTGCTTTCCTTGTGGCTCACCTCAAATGCGTCAGTGCATCTCTTGATTGGACATAGTACGGCGTGATAAGTGTCTTCGCCGGCACCTCATTAGAGGGTGGCTGATCGGGAGCTCTGTGCTTTCGAACCGTCTTCGGACAATCTCTGACA	Fungi	Basidiomycota	Agaricomycetes	Sebacinales	Sebacinaceae	Sebacina	sebacina	emb|LN910006.1	99.51	3.59e-96	98.53
OTU358	174_3605131|F|ITS2;size=3;	LT979835	AATTCTCAAAACCCCTTCCTTTGCCGGAATGGATTTTGGACTTGGAGGCCTTTTGCCGGTTTCACCTCGAAGCCGGCTCCTCCTAAATGGATTAGTGGGGTCTGCTTTGCCGGTCCTTGACGTGATAAGATGCTTCTACGTCTCGGGTTTTGGCACTGTGCCTCTGCTTCTAACCGTCTCATTGACAACGATGGTGTTCCGGTCACCGCCGATTCCTCGGTGGGAGGCTTGACCCACAAAACGAC	Fungi	Basidiomycota	Agaricomycetes	Russulales	Russulaceae	Russula	russula-lactarius	dbj|AB769906.1	100	4.59e-115	97.55
OTU359	174_3607225|F|ITS2;size=12;	LT979836	AATCTTCAAAACCCTTTTTTCCTTTGAACCATTGCGGTCGGGAAAAGGATTTTTGGACTTGGAGGCTCAATGCCCGCCCTTTCTTTTTGAAAGCGCGAGCTCCTCTCAAATGAATTAGTGGGGTCCGCTTTGCTGATCCTTGACGTGATAAAATGTTTCTACGTTTTGGGTTTAGCACTGTTCCTTGGATGCCTGCTCCTAATCGTCTCATTGACAATGATGGTGCTCTGGTCACCGCCGTCTACATCGGCGGGAGGCTGGACCCACAAAAAGAAAA	Fungi	Basidiomycota	Agaricomycetes	Russulales	Russulaceae	Russula	russula-lactarius	UDB007450	100	3e-144	100
OTU360	177_3655555|F|ITS2;size=1247;	LT978642	AATTCTCAACCTTTTCAACTTTTTTCAAAGTTGGATAAGGCTTGGATAGTGGGAGTGTCTGCGGGCTTCTCAGAAGTCTGCTCTCCTTAAATGCATTAGCAGGATCCTTGTATTGCTTTTGGTGTGATAATTATCTACGCCATAACTTGTACATGTGGATATACTGCTTCTAACCGTCTCGATCATGAGACAGCTTTGACA	Fungi	Basidiomycota	Agaricomycetes	Agaricales	Tricholomataceae	Tricholoma	tricholoma	gb|JQ711805.1	100	1.74e-64	89.76
OTU361	177_3667025|F|ITS2;size=2590;	LT979837	ACATCCTTCAACCTTTCTTGGTTTCTTGACCGGGGAAGGCTTGGACTTTGGGGGTTTTTCATTGCTGGCCTCCCTTGAAGCCAGCTCCTCCTAAATGGATTAGTGGGGTCTGCTTTGCCGATCCTTGACGTGATAAGATGTTTCTACGTCTTGGGTTTCGCACTGTCGCTTCAGACCCTGCTCCTAACCGTCTTGCATCTAAGACACAGTTTTATGAA	Fungi	Basidiomycota	Agaricomycetes	Russulales	Russulaceae	Russula	russula-lactarius	GU134509	100	2e-111	100
OTU362	178_3679140|F|ITS2;size=3485;	LT979512	TACTCTCACACTTCCGATTGTTTAGATTGGGAGCGGTGGACTTGGGTGTTGCTGCGTTACTGTGGCTCACCTTAAATGCAGTAGTGCACCTTTCGGTTGGACATAGTACGGCGTGATAAGTGTCTTCGCCGGCACCTCCTCACAGAGGGTGGCTGATCGGGAGCTCTGTGCTTCAAACCGTCTTCGGACAACAACTGACA	Fungi	Basidiomycota	Agaricomycetes	Sebacinales	Sebacinaceae	Sebacina	sebacina	emb|HF565090.1	100	6e-94	98.5
OTU363	179_3694184|F|ITS2;size=126;	LT979513	GTACTCTCACACTCCCAATCCTTTTTCTTTGGATTGGGAGCGGTGGACTTGGGTGCTGCTGCTTACTGTGGCTCACCTCAAATGCGTTAGTGCAACCGTTGGTTAGACATAGTACAGCGTGATAAGTATCTTCGCTGGCGCCTCACTCGAGGGTGGCTGATCAGGGCTCTGTGCTTCCAATCGTCTTCGGACACTGCTGACA	Fungi	Basidiomycota	Agaricomycetes	Sebacinales	Sebacinaceae	Sebacina	sebacina	gb|EU668260.1	88.12	4.74e-80	97.77
OTU364	179_3694257|F|ITS2;size=66;	LT980136	GAGTCTCTCAAATGGGGTTTGTCACTCCTTTGGATTTTGGGTCTTGCTGTGAAATTCATCTCAGCTTACCTTGAAAGCATTAGCAAGCATTCTCAAGTCTTCTGTGATGAGGGCGTTCTAATCTCGCAAACTGGTCTGTGTAGCCAGTGGAAAAAGACGTCTAAACATCATTATGAAGTGATGCTAGCTTCCAATCATCCTTATGGGATGGGCACTCAATGTTTTTAT	Fungi	Basidiomycota	Agaricomycetes	Cantharellales	Cantharellaceae	Pseudocraterellus	cantharellus	KM576333	74	1e-58	90.61
OTU365	179_3702558|F|ITS2;size=10;	LT980514	CCATCCCCTCAAGCTCCGCTTGGCTGGTTGGGCCGACGTCCACCCGTGGCTTTGTGCCGGGGGGAGACGGGCCCGAAAGGCAGTGGCGGCTCCCGGAGGGTGGTCCCTTGGGGCGGTTGATACATGGGTTGTCATCTTCCACCGCTCCGTTGGCCACGCTCCGGGGGTCCAGTCGAACGATTGGTCTTCCCCTCTA	Fungi	Ascomycota	Eurotiomycetes	Eurotiales	Elaphomycetaceae	Elaphomyces	elaphomyces	HQ022116	98	7e-95	99.48
OTU366	18_387398|F|ITS2;size=17863;	LT980819	AATTCTCAACCATGTCTTGATTGATTTCAAAGCCATGGCTTGGAGTTGGGATGTTGCTGGCAGTGAAATGCAGTCAGCTGTCCTGAAATATATTAGCAAAGGTGAACATGCAGGTCTGTATTGGACATGCACGGCCTTCGACGTGATAATGATCGTCGTGGCTGGAGTGTTCAGACATGCACACTAAGTGATCCTTGCTTCCAATTCCTAACATTGACCACTTTCGTGGGAGATGTTATTTTTGACA	Fungi	Basidiomycota	Agaricomycetes	Boletales	Boletaceae	Boletus	boletus	dbj|AB973752.1	100	2.25e-113	97.18
OTU367	18_392586|F|ITS2;size=43175;	LT980997	CCCCCCAACTCAAGCGTCCATTTAATGATGCTTGGATTTCTTTGGAGAGGTATCACTTTTTATTAAGAGAAGCCCTCCAGAAATTCATAGGCAGTATGGTTTGCACTAGAACCAGACGTAATAATAATAAAATCGTTTGTTGTGGTATAAGCCTTGTACTTGCCTTGAAAACACCCATTGATTTTC	Fungi	Ascomycota	Pezizomycetes	Pezizales	Pezizaceae	_	terfezia-peziza	emb|LN909738.1	100	2.03e-79	96.24
OTU368	18_403162|F|ITS2;size=17112;	LT980842	AATTCTCAACCAATGTCTTGATTGATGTTGGCTTGGAGTTGGGAGTTGCTGGCAATCTCTTTTGTCAGCTCTCCTGAAATGTATTAGCAATCGGATAGCTAGTCTTTGATGTGCACGGCCTTCGACGTGATAATGATCGTCGTGGCTGGAGCGTCTTTGAACCGTGCATGAATAGCCTATTGCTTATAATAACCAAATTCAAATTGGACTTGTAA	Fungi	Basidiomycota	Agaricomycetes	Boletales	Boletaceae	Boletellus	boletus	AB509647	93	3e-99	99.5
OTU369	18_409328|F|ITS2;size=291;	LT980357	GAAACCTCTCAACCACCCTCAAAGGTGGCTTGGAAATGGGGGAACTGTTGCAGGCTCAGCCAGAGTCTGCTCCCCTGAAATGCATTAGTGGTGTCTGGGCTGACTGCCACAGGTGTGATAACTATCAGTGCCTTGGTGGAAACCTTTGCTGCTTTCCAACTTCTATGATGACCA	Fungi	Basidiomycota	Agaricomycetes	Agaricales	Inocybaceae	Inocybe	inocybe	emb|LN911575.1	100	1.9e-54	90.29
OTU370	18_411308|F|ITS2;size=8828;	LT980237	AATTCTCAACCTCCCCAATTTATTTGGGGGTAAGGCTTGGACTTTGGAGGCGTTTGCTGGCCTCCCTTTTTGAAGGCCAGCTCCTCTTAAATAAATTAGTGGGGTCCCTCGTTGCCGGTCCCTCGACGTGATAAGATTTCTCTACGTCCGAGGTTTGGCTCTCTGTAGGCCCGCTTCTAACCGTCTCTTCTCGAGACACGTTTGAACC	Fungi	Basidiomycota	Agaricomycetes	Russulales	Russulaceae	Lactarius	russula-lactarius	gb|GU258227.1	90.87	6.73e-64	91.15
OTU371	181_3743599|F|ITS2;size=2758;	LT980208	AATCCTCAACCCTTCTCCCTTTTTGGGAAAATGGTTTGGAATTTGGAGGCTTTTGCTGGCCCCTTCTTTTTGAAGCCAGCTCCTCTTAAATGCATTAGCAGGGTCTCCTTTAGCCGGATCCCTCGACGTGATAAAGTTTTTACGTCCTGGGGGCTTACTTGGCTCTAACCTGCTTCCAATCGTCTCGTCGAGACTAAAACTGAATCTGA	Fungi	Basidiomycota	Agaricomycetes	Russulales	Russulaceae	Lactifluus	russula-lactarius	AB509713	100	6e-86	94.26
OTU372	182_3748328|F|ITS2;size=458;	LT980722	ACTTTCTCAAGCTTGGGTGGCTTTGTCTGTCCTTAGCCTTGGTTGTTGGGCTTTGCCGTGTCCTTCATTTTTGGACGGCTGGCCTTAAAAGCATTAGCTGATCCTCCTGTGGCACTGGTTCTACTCAGCGTGATAATAGTCTGATCGCTGAGGACATCTTTTGGGATGGCCAGTTCTCATTTGGGTTGCTTCTAAACCTGGTTTTGCAGATTCTTCAATCTGTGTTCCACTTTTCAG	Fungi	Basidiomycota	Agaricomycetes	Cantharellales	Clavulinaceae	Clavulina	clavulina	JF273520	99	6e-121	100
OTU373	183_3760937|F|ITS2;size=375;	LT980820	GAATTCTCAACCATGTCTCGATCGATTTCGAGGCCATGGCTTGGACTTGGGGGTTGCTGGCGGCGCAATGCTGTCGGCTCTCCTGAAATGCATTAGCAAAAGGGGCTGCAAGTCTTTGGACGTGCACGGCCTTTCGACGTGATAATGATCGTCGTGGCTGGAGCGTTCGGACGTGTGCATGAACGGACCCAATGTTGCTTCCAATTCCTAATCCCAAGTCTAGAGTCACTCAGCTACTAGTCAGGTCGTGAGGCCGACGAACGTTGGGTGGCCAAGGTTTGGCTATTTCGAA	Fungi	Basidiomycota	Agaricomycetes	Boletales	Boletaceae	Boletus	boletus	UDB022819	100	2e-116	93.17
OTU374	183_3767137|F|ITS2;size=639;	LT978603	GAAAACCCCATCACAGTTCCTGTGGTCTTGGTATGAGTGGGTTGATAGTATGTAGAGACATGCTTATAACACTCTACTGAAATTTATAGACAGGATACCAGACATGGACAATAGACTTTGTAAATGTCCACAGGATATATATCAGTCACGTGTCATGTTTGGTCCTGATATTATGGACTCCTATTCTATACAAACATTG	Fungi	Ascomycota	Pezizomycetes	Pezizales	Tuberaceae	Tuber	tuber-helvella	GU979042	100	1e-97	98.99
OTU375	185_3790419|F|ITS2;size=3297;	LT980238	AAATCTCAACCTCCTTGATTTCTTCTGGAGATCAAAGGAGGCTTGGACTTTGGAGGCATTTGCTGGCGTCTCTCTCCAGCTCCTCTTGAATGAATTAGCGGGGTCCTCTTTGCCGACCCTTGACATGTGATAAGATGCTTCCGTGTCTTGGTTTTTGGCTCTGTTGCCTTTGGGACCCGCTTCTAACCGTCTCGACTTGAGACAACGCTCGAGCCTGTCTCCCTTCTCAGGGAGCCCCTCTCGGCCCCACGAAC	Fungi	Basidiomycota	Agaricomycetes	Russulales	Russulaceae	Lactarius	russula-lactarius	KF432976	100	9e-110	94.88
OTU376	185_3792785|F|ITS2;size=368;	LT979838	AATTCTCAAAACCCATTTCTTTTGGTCATTTTTGACCATGGAAAGGATTTTGGACCTGGAGGCCTTTTGCTGGTTTCACCTTGAAGCGAGCTCCTCCCAAATGTATTAGTGGGGTCCGCATCGTCGGTCCTTGGCGTGATAAGTCGTTTCTACGTCTTGGATCTTTGGCGCTGTCCACCTGCTTCTACCCGTCTCATTGACAACGATGGTGCTCCGGTCACCGCCGATTTATCGGTGGGAGGCTTGACCCACAAAACAAA	Fungi	Basidiomycota	Agaricomycetes	Russulales	Russulaceae	Russula	russula-lactarius	AB507009	100	7e-121	96.92
OTU377	186_3803977|F|ITS2;size=1438;	LT980109	CCCCCACACTCAAGTCTCTTAATTGAAGCTTGGATCATTTTAAAGAAGTAGCTGAAATACAATAGGCTACTCTTTAGAAATTCATAGGCAGTATGGCACCTGAACTAGGCGTAATAAGAATATAAAAGCGTCTCTCTTTAGGAAGGTTGTACTTGCCTCAACCCACCCATTTTCTCTTTT	Fungi	Ascomycota	Pezizomycetes	Pezizales	Pezizaceae	Ruhlandiella	terfezia-peziza	JX414204	97	5e-81	97.71
OTU378	186_3804852|F|ITS2;size=30;	LT980110	CCCCCACACTCAAGTCTCTTAATTGAAGCTTGGATGACTTTAAAGAAGTGGCTGAAATACAATAGGCTACTCTTTAGAAATTCATAGGCAGTATGGCACCTGAATTAGGCGTAATAAGAATATAAAAGCGTCAATCTTTAGGAAGGTTGTACTTGCCTCAACCCACCCATTTTCTTTT	Fungi	Ascomycota	Pezizomycetes	Pezizales	Pezizaceae	Ruhlandiella	terfezia-peziza	gb|JX414204.1	98.88	6.28e-74	96.02
OTU379	186_3804879|F|ITS2;size=9;	LT980455	AATTCTCAACCTTATCAGTTTATTTCTGATAGTGGCTTGGATGGTGGGGGTGCTGGCTCCTTTATTGAGGTCAGCTCCCCTTAAATGCATTAGCTGGTGCCCCGTGTGGACTGTCTATTGGTGTGATAATTATCTACGCTATTGATGTCCTTAGCACTGCTTCTAACGGTCTGTTAATTTGGACAATACAATGACA	Fungi	Basidiomycota	Agaricomycetes	Agaricales	Hebelomataceae	Hymenogaster	hebeloma-alnicola	gb|HM358999.1	100	4.98e-95	99.49
OTU380	187_3827872|F|ITS2;size=4;	LT980562	ATATAACCTCAAACCTTTTCTTTGTTGAAGGGATTGGATGTGGGGGTTTTGCTGGGCCTCTTAAGAGGTTCAGCTCCTCTGAAATGCATTAGCAGAACAACCTTGCTCATTGGTGTGATAACTATCTACGCTTATGAATGCAAGGGGCAGTTCAGCTTTCTAACTGTCTTTGGACAATTCATCATTA	Fungi	Basidiomycota	Agaricomycetes	Agaricales	Cortinariaceae	Cortinarius	cortinarius	emb|FR851998.1	100	2.35e-83	97.33
OTU381	188_3838157|F|ITS2;size=62;	LT980358	TCACCTCTCAACCCCTCCCACTTATGTGTGTGTGTGTGGTGTTTGGATATGGAAGTTTGCAGGCCTCTCAAGGTCAGCTCTTCTTAAATGTATTAGTGGTGTCCATTACTACTGCAGGTGTGATAAATCATTTATGCCTTTGCTGGTGGTATTGCATTGCTTGAAAAACCAAATTTATGACAA	Fungi	Basidiomycota	Agaricomycetes	Agaricales	Inocybaceae	Inocybe	inocybe	GQ892992	100	3e-88	98.91
OTU382	188_3841121|F|ITS2;size=42450;	LT980723	AATTTCTCAAGCTTGGATGGCTTTGTCTGTCCTTAGCCTTGGTTGTTGGGCTTTGCCGTATCCTTCGTTTTGGGACGGCTGGCCTTAAAAGCATTAGCTGATCCTCCTGTGGCACTGGTTCTACTCAGCGTGATAATAGTCTGATCGCTGAGGACATCTTTTGGGATGGCCAGTTCTCATTTGGGTTGCTTCTAAACCTGGTTTTGCAGATTCTTCAATCTGTGTTCCACTTTTTCAG	Fungi	Basidiomycota	Agaricomycetes	Cantharellales	Clavulinaceae	Clavulina	clavulina	JF273520	100	1e-113	97.9
OTU383	188_3842545|F|ITS2;size=104;	LT980707	TGATCTCAATTCCCCTCAGGCTTTATTTTGAAATATAAATGAAGGCCTGTTCAGGGTTATTGGATTTGGAGGTTTCATGCAGGTTCCTTTTGTAAGGGAATCGGCTCCTCTTAAAAATATTAGCTGGAGGATGAAGCAAAAATATAGGCTCAGCATTGTTCAATTGGCTTTTATTGTGTAGTAATTATTTCATCATATGCTATACAGTGCACGGGAAAATATAGTCCCAAAGGAGGCTTTTTGTAGCATTCTCTGCTTCTAGTTTTGTCAGGTCTTATCTGGCAATTCATGTATTCTT	Fungi	Basidiomycota	Agaricomycetes	Hymenochaetales	Hymenochaetaceae	Coltriciella	coltricia	gb|JQ991688.1	100	1.01e-141	97.67
OTU384	188_3847005|F|ITS2;size=106;	LT978741	ACACCTCAACTCATCATGGTTTTCTATGATGAGCTTGGACTTTGGGGGTTTTGCTGGCTTACGGTCGGCTCCTCTAAAATGAATCAGCTTGCCAGTGTTTGGTGGGTATCATGGGTGTGATAACTATCTACGCTTGTGGTTTTTCCACCAGATAACCTTCAGCAGTGGAGGTTCACTGGAGCTCACAGACGTCTCTCCTCAGTGAGGACAGCCCTTTTAAT	Fungi	Basidiomycota	Agaricomycetes	Thelephorales	Thelephoraceae	Tomentella	tomentella-thelephora	gb|KC191593.1	100	6.1e-94	95.5
OTU385	189_3850889|F|ITS2;size=40;	LT979514	TAATCTCACTACAACCGCTTTTTTGTGGTTGCATGTGGACTTGGATGTTGCCGTGTCACAAACGGCTCGTCTGAAATGCCTGAGTGTACCCCTGCTTTGCAGCGTATTTGGTGTGATAAATCTTCACCGGAGTTGACCCTCAGGGTCACGTCTGCTTGACATGGCTCTATGCTGCCAACTGTCCTGACAAGGACAATCTTTGACA	Fungi	Basidiomycota	Agaricomycetes	Sebacinales	Sebacinaceae	Sebacina	serendipita2	gb|JN704824.1	100	1.7e-94	98.05
OTU386	19_426573|F|ITS2;size=799;	LT979839	AATTCTCAAAAGCCTTTTTCTGCTTTTTCTGGAAAGGGTTTTTGGACTTGGAGGTTCAATGCTTGCTTTTAAAGTGAGCTCCTCTCAAATAAATTAGCGGGGTCTGCTTTGCCGATCCTTGACGTGATAAGATGTCTCTACGTTTTGGATCTGGCACTGTCCCTTTGGACACCTGCTCCTAACCGTCCCACGGACAACGATGGTGCTCTGGTCTTTGCTGCCTACACTGGCGGGGGAGGCTGGACCCACGAAAGAAAA	Fungi	Basidiomycota	Agaricomycetes	Russulales	Russulaceae	Russula	russula-lactarius	AB509672	100	2e-96	91.04
OTU387	19_427655|F|ITS2;size=15556;	LT979840	AAATCTCAAAAACCCCTTTTCCATTCGAAAAGGATTTTTGGACTTGGAGGTTCAATGCTTGCCTTTTAGTTTTAAAGGTGAGCTCCTCTTAAACAAATTAGTGGGGTCCGCTTTGCTGATCCTTGACGTGATAAGATATTTCTACGTTTTGGATTTGGCACTGTCTTTTGGATGTTCGCTTCTAACCGTCTTAAGGACGAATGATGGTGCTTCGGTCACCGCCATCTACATTGGCGGGAGGCTGGACCCACAATAAAAC	Fungi	Basidiomycota	Agaricomycetes	Russulales	Russulaceae	Russula	russula-lactarius	gb|AY061690.1	89.96	1.48e-79	90.6
OTU388	19_429870|F|ITS2;size=209;	LT979841	AACCCTCAAAATCCCTTTTCTTTCATCGGAATGGGGATTTTGGACTTGGAGGTTCAATGCTCGCTTTCGCTTTCGAAAGTGAGCTCCTCTTAAATCGATTAGTGGGGTCCGCTTTGTCGATCCTTGACGTGATAAGATGTTTCTACGTTTTGGACTTGGCACTGTTTTCTCCGCTCCTAACCGTCCCATGGACAAACGATGGTGCTTCGGTCTCCTGTCATCTACGTTGGCGGGAGGCTGGACCCACAAAAAA	Fungi	Basidiomycota	Agaricomycetes	Russulales	Russulaceae	Russula	russula-lactarius	emb|LN911849.1	97.63	6.1e-94	92.71
OTU389	19_433581|F|ITS2;size=96;	LT980777	CACCACTCAAGCCTGGCTTGGTGTTGGGCGATGTCCTCCTTGGGGACGCGCCTCGAAACGCTCGGCGGCGTGGCACCGGCTTTAAGCGTAGCAGAACCTTTCGCTTTGAAAGTCGGGGCCCCGCCTGCCGGAAGGCCTACTCGCAA	Fungi	Ascomycota	Dothideomycetes	Hysteriales	Gloniaceae	Cenococcum	cenococcum	dbj|LC095045.1	100	1.46e-60	96.58
OTU390	190_3880468|F|ITS2;size=1132;	LT980778	CACCACTCAAGCCTGGCTTGGTGTTGGGCGACGTCCCTTTGGGACGCGCTTCGAAACGCTCGGCGGCGTGGCACCGGCTTTAAGCGTAGCAGAATCTTTCGCTTTGAAAGTCGGGGCCCCGTCTGCCGGAAGACCTACTCGCAA	Fungi	Ascomycota	Dothideomycetes	Hysteriales	Gloniaceae	Cenococcum	cenococcum	FN669172	100	1e-70	100
OTU391	191_3883479|F|ITS2;size=6;	LT979515	GTACTCTCACACTTCCGATCCTTTGGATTGGGAGTGGTGGACTTGGGTGTTGCCGCTTTACTGTGGCTCACCTCTAATGCATTAGTGCAACTCTTGGTTGGACATAGTACGGCGTGATAAGTGTCTTCGCCGGCACCTCACAAGAGGGTGGCTGATCAGGAGCTCTGTGCTTCAAACCGTTCTTGGACAATAACTGACA	Fungi	Basidiomycota	Agaricomycetes	Sebacinales	Sebacinaceae	Sebacina	sebacina	dbj|LC122197.1	100	1.02e-81	95
OTU392	191_3885087|F|ITS2;size=3650;	LT980919	CAAACCCGTTCATACATATTATATGGTATTGATGGAAGTGGACAGTGGTTACTAATAATGTATCCGGATCACCCCATTGAAATGTATAGGCAGGACAGTAAACCTCTGCAATGGACTTAGTAACTGTTGTGAAAACATAGACCAGTCCTTTGCCTGGTTCCAGCCTGGCCTCCATGGACCTCTATCCAAGATAAAATCTG	Fungi	Ascomycota	Pezizomycetes	Pezizales	Tuberaceae	_	tuber-helvella	GQ985432	100	3e-93	97.5
OTU393	192_3899878|F|ITS2;size=5472;	LT980852	AAATCTCAAAACCTAGCTTTGCTTCGTCGGAGCTCGGTTTTGGACCTTTGGGAGTCTGCGGGCGACCCTTTGCTTGGGACGTCGGCTCTCCTCAAATGCATTAGCGGTGGGCGCGAGCCTTTGCACGGCACGGCCTGTTCGACGTCGTAGTGATCGTCGCGGGCTGGAAGTGCTCGGATCGACATGTCTCATGCTTCCAACCATGTTATTAGCCTATGCAAGGCTAGTAAATTAAG	Fungi	Basidiomycota	Agaricomycetes	Boletales	Diplocystidiaceae	Astraeus	pisolithus-scleroderma	AJ629394	100	2e-115	98.32
OTU394	193_3905274|F|ITS2;size=14;	LT978742	ACACCTCAACCCTCATGGTTTGCCATGACGGGCTTGGACTTTGGGGGTCTTGCTGGATTGTAGTCAGCTCCCCTTAAACGAATCAGCTTGCCAGTGTTTGGTGGCATCACAGGTGTGATAACTATCTACGCTTGTGGTTTCCACCAGGTAACCTTCAGTAACATGGGGGTTCGCTGGAGCTTATAAATGTCTCTCCTCAGTGGGGACAGCTCTTTGAAC	Fungi	Basidiomycota	Agaricomycetes	Thelephorales	Thelephoraceae	Tomentella	tomentella-thelephora	gb|KP123619.1	100	5.06e-85	93.27
OTU395	193_3908865|F|ITS2;size=12;	LT978743	ACACCTCAACTCTCATGGCTTGCCATGATGAGCTTGGACTTTGGGGGTCTTGCTGGCCTATGGTCAGCTCCTCTCAAATGAATTAGCTTCCCAGTGTTTGGTCGGCATCGCAGGTGTGATAACTATCTACGCTTGTGGTTTCCACCAGGTAACCTTCAGTAACATGGGGGTTCGCTGGAGCTCATAAATGTCTCTCCTCTGTGAGGACAGCTCTTTGAAT	Fungi	Basidiomycota	Agaricomycetes	Thelephorales	Thelephoraceae	Tomentella	tomentella-thelephora	gb|JX625336.1	99.55	3.59e-96	96.35
OTU396	194_3936507|F|ITS2;size=33;	LT980504	CATCCTCGAATCCGAGGTCCCTCTCGAGGGGACACGGAATCCGGAACTTGGGGGTTGCGGGCACACGTCCTCGTGGGACGGGTCGGCTCTCCTGAAACGTATCAGCGGGAGAGGATGGCATCGCGACGGAGCATGACCTTTTCCCCTCGACGTCGTAAGGATCGTCGTGGGGGCTAGGGACCTCGTGAGCGATGGTCGTCCGTCTCGGGCTTCCAGTCACACACACCCGTGTCTCAGG	Fungi	Basidiomycota	Agaricomycetes	Boletales	Gyroporaceae	Gyroporus	pisolithus-scleroderma	FM999661	92	2e-70	89.59
OTU397	194_3936940|F|ITS2;size=58;	LT978604	CAAACCCGCTCATACATATCATGGTATTGATGGAAGTGGACTGTGGTTACTCATAATGTATCCCGATCACCCCATTGAAATATATAGGCAGGACATTAAACCTCTGCAATGGACTTAGTAACTGTTGTGAAAACATAGACCAGTCCTTTGCCTGGTTCCAGCCTGGCCTCGATGGACCTCCATCCAAGATAAAACTCTG	Fungi	Ascomycota	Pezizomycetes	Pezizales	Tuberaceae	Tuber	tuber-helvella	FJ797879	100	2e-95	98.49
OTU398	194_3937065|F|ITS2;size=41;	LT981247	AACTTGTCAACCACTTTGGGAGTCATTTTTCAATGTGGCTTGGATGTGGGGGATTTGCAGGCTTTTCTTCTGTCTGCTCTCCTGAAATGCATTAGTGGTGTCTAAAGGTTACAGCCGCAGGTGTGATAAATTATCTATGCCTTTGGTATGAAACAGACTGTGCTGCTTCTAAATGAAATGAGCCCTGCAGGCTCTTTCTTTTGATGA	Fungi	Basidiomycota	Agaricomycetes	Agaricales	_	_	inocybe	JN197723	58	2e-25	84.09
OTU399	194_3939630|F|ITS2;size=100;	LT978744	ACACTTCAACTCTCATAGCTTGCTGTGATGAGCTTGGACTTTGGGGGTCTTGCTGGCCTGTGGTCAGCTCCTCTCAAATGAATTAGCTTTCCAGTGTTTGGTGGCATCACGGGTGTGATAACTATCTACGCTTGTGGTTTCCATCAGATAACCTTTGGGTTCGCTGGAGCTCATAAAGGTGTCTCTCCTCTGTGAGGACAGCTCTTTGAAT	Fungi	Basidiomycota	Agaricomycetes	Thelephorales	Thelephoraceae	Tomentella	tomentella-thelephora	AY310869	99	9e-74	90.41
OTU400	194_3940692|F|ITS2;size=4;	LT978745	ACACCTCAACCCTCATGGTTTGCCATGACGGGCTTGGACTTTGGGGGTCTTGCTGGCCTATCACCGGCTCCTCTCAAATGAATCAGCTTGCCAGTGTTTGGTGGCGTCACGGGTGTGATAACTATCTACGCTCGTGGTCTCCCACCAGGTAACCTTCAGCAATGGAGGTTCGCTGGAGCTCACAAACGTCTCTCCTCAGCGAAGACAGCTTTCTGAAC	Fungi	Basidiomycota	Agaricomycetes	Thelephorales	Thelephoraceae	Tomentella	tomentella-thelephora	gb|EF644155.1	100	5.02e-90	94.95
OTU401	194_3943469|F|ITS2;size=14;	LT978746	ACACTTCAACTCTCATAGCTTGCTGTGATGAGCTTGGACTTTGGGGGTCTTGCTGGCCTGTGGTCAGCTCCTCTCAAATGAATTAGCTTTCCAGTGTTTGGTGGCATCACGGGTGTGATAACTATCTACGCTTGAGGTTTTCCACCAGGCAACCTTCAGTAATGAGGGTTCACTGGGGCTCACAAATGTCTTTCTTTGGTGAGGACAGCTCTTTGAAT	Fungi	Basidiomycota	Agaricomycetes	Thelephorales	Thelephoraceae	Tomentella	tomentella-thelephora	dbj|LC013819.1	99.54	2.37e-78	91.71
OTU402	194_3952821|F|ITS2;size=82;	LT978747	ACACCTCAACTCTTTATGGTTTTCCATGATGAGCTTGGACTTTGGGGGTTTTGCTGGCCTATGGTCGGCTCCTCTAAAATAAATCAGCTTACCAGTGTTTGGTGGGTATCATGGGTGTGATAACTATCTACGCTTGTGGTTTCCCACCAGATGACCTTCAGCAATGGAGGTTCGCTGGGGCTTATAAATGTCTCTCCTCGGCGAGGACAGATTTTGACC	Fungi	Basidiomycota	Agaricomycetes	Thelephorales	Thelephoraceae	Tomentella	tomentella-thelephora	JF506816	96	2e-85	93.84
OTU403	194_3955245|F|ITS2;size=123;	LT978748	ACACCTCAACCCTCATGGTTTGCCATGATGGGCTTGGACTTTGGGGGTCTTGCTGGCATACCGTCAGCTCCTCTCAAATGAATCAGCTTGCCAGTGTTTGGTGGCGTCACGGGTGTGATAACTATCTACGCTTGTGGTTTTTCCACCAGGTAACCTTCGACAGCGGAGGTTCACTGGAGCTCATAGATGTCTCTCCTTAGCGAGGACAGCCCTTTGAAT	Fungi	Basidiomycota	Agaricomycetes	Thelephorales	Thelephoraceae	Tomentella	tomentella-thelephora	gb|KP753363.1	100	1.83e-79	91.86
OTU404	196_3985131|F|ITS2;size=54;	LT980330	AATTCTCAACCTTCCAGCTTTTATCAGCTTGGTTTAGGCTTGGATGTGGGGGTTGCAGGCTTCACTTTTTAGGTCAGCTCTCCTTAAATGCATTAGCGGAACTTTTGTGGACCGTCTATTGGTGTGATAATTATCTACGCCGTGGATGTGAAGCAGCTTTATAAAGTTCAGCTTCTAACTGTCCATTGACTTGGACAATTTTGACA	Fungi	Basidiomycota	Agaricomycetes	Agaricales	Hydnangiaceae	Laccaria	laccaria	JQ670896	100	5e-96	97.57
OTU405	197_4021213|F|ITS2;size=3229;	LT980157	TTATACCCACTCAGATCTTTGATTATTTTATATAGTCTTAGATTTGGATTTAATCAGAGAAGTAACCTATTTGAGTAGATTACTCTTTGGAAATATAAAGGCAGTTGTAGTGAAACCTATATTAAACGTGATATTAAAAAGTTTCGTTTAAAAGGACTGAATCTTTGACTTGCCTTTAACCCACTTAATTCTTT	Fungi	Ascomycota	Pezizomycetes	Pezizales	Pezizaceae	Peziza	galactinia	gb|HM105547.1	100	1.51e-95	100
OTU406	198_4044074|F|ITS2;size=4;	LT980158	CCCACTCCACTCACGTATCTGATTTCCTAGATGCTTGGAATTGCTTTGGGGAGGTGTCTCGTTATAGTGATGCCCCCCAGAAATTGATAGGGCAGTATGGTTTGCACCTGAACTAGACGTAATAATAATAAAATCGTTTGTTTAGGTATAATTGTGCTTGCCTTAACCCACCCATTTTTCTTTAATCTTT	Fungi	Ascomycota	Pezizomycetes	Pezizales	Pezizaceae	Peziza	terfezia-peziza	EU819535	94	9e-64	91.62
OTU407	2_27022|F|ITS2;size=21740;	LT980779	CACCCCTCAAGCCTGGCTTGGTGTTGGGCGACGTCCTCTTTGGGGACGCGCCTCAAAACGCTCGGCGGCGTGGCACCGGCTTTAAGCGTAGCAGAATCTTATCTTTCGCTTTGAAAGTCGGGGCCACATCTGCCGGAAGACCTACTCGCAA	Fungi	Ascomycota	Dothideomycetes	Hysteriales	Gloniaceae	Cenococcum	cenococcum	AB839374	100	2e-74	100
OTU408	2_27035|F|ITS2;size=3545;	LT980960	GAATCCTCAGGTCGACCCTCCGACCCTCGTCGGAGCCTCGGTCTGGACTCGTGGGAGTCTGCGGGCGAAGCGTGTCTTCGTCCGCTCTCCTCAAAAGCATCGGCCGTGGGCGCCGAGCCTGGCATGGCACGGCCTCTCCGACGTCGTAGTGATCGTCGCGGGCTGGAAGTGTACGGCTCGACGCGCCCATGCTTTGCGAGCCCGTCCCTCGTGGTCGGCCGCGCCCCATCGAA	Fungi	Basidiomycota	Agaricomycetes	Boletales	Sclerodermataceae	_	pisolithus-scleroderma	KC152224	100	4e-73	88.02
OTU409	2_27044|F|ITS2;size=17033;	LT978749	ACACCTCAACCTTCGTGGTTCGCCACGATTGGATTGGACTTTGGAGGTTTTGCTGGCCCCTGTGGTCGGCTCCTCTCAAATGAATCAGCTTACCAGTGTTTGGTGGCGTCGCAGGTGTGATAACTATCTACGCTTGTGGCCGTCTGCCATGTAACCTTCAGTGATGAGGGTTTGCTGGGGGCTCACAGATGTCTCTCCTGAGCGAAGACAGCTTTTTGATC	Fungi	Basidiomycota	Agaricomycetes	Thelephorales	Thelephoraceae	Tomentella	tomentella-thelephora	gb|JQ991886.1	100	4.75e-90	94.57
OTU410	2_27062|F|ITS2;size=105086;	LT980239	AATTCTCAACCTCCTTGGTTTCTTCTGGAGACTGAAGGAGGCTTGGACTTTGGAGGCCTTTGCTGGCATCACTTGCCAGCTCCTCTTAAACGAATTAGCGGGGTCCTCTTTGCCGACCCTCGACATGTGATAAGATGCTTCCGTGTCTCGGTTTCTGGCTCTGTTGCCTTTGGGACCCGCTTCTAACCGTCTGGACCTTGCGTCAGAGACAACGTTCGAGCTCGTCTCCCTTCTCGGGAAACCCCCTCGACCTCACGAAC	Fungi	Basidiomycota	Agaricomycetes	Russulales	Russulaceae	Lactarius	russula-lactarius	gb|JQ991758.1	100	2.68e-132	100
OTU411	2_27236|F|ITS2;size=22053;	LT980780	CACCACTCAAGCCTGGCTTGGTGTTGGGCGACGTCCCCTTCAGGGACGCGCCTCGAAACGCTCGGCGGCGTGGCACCGGCTTTAAGCGTAGCAGAATCTTTCGCTTCAAAAGTCGGGGCCCCGTCTGCCGGAAGACCTACTCGCAA	Fungi	Ascomycota	Dothideomycetes	Hysteriales	Gloniaceae	Cenococcum	cenococcum	AB873200	100	1e-71	100
OTU412	2_28641|F|ITS2;size=81;	LT980240	AAACCTCAACCTCCTTGGTTTCTTCTGGAGACCAAAGCAGGCTTGGACTTTGGAGGCGCTTGCTGGCACCTCTCTTTTTGAAGGCCAGCTCCTCTTAAACAAATTAGCAGGGTCCTCTTTGCTGATCCTCGATGTGTGATAAGATGTTTCCATGTCTTGGCTTCTGGCTCTGTCACTTTTGGGACCTGCTTCTAACTGTCTGGACCTTGAGTTTGAGACAACGTTCGAGCATGTGCCTCCCTTATCGGGAAGCTCCCTCGACCCCACGACC	Fungi	Basidiomycota	Agaricomycetes	Russulales	Russulaceae	Lactarius	russula-lactarius	EF634122	100	1e-127	97.07
OTU413	2_32158|F|ITS2;size=36303;	LT981042	AATTCTCAAACCACATCAGTTTTGCTGGTGTGGCTTTGGACTTGGGAGGTTATTTTTTGCAGTCCTTTTCGCTAGAGGGTACTGCTCTCCTAAAAAATATTAGTGGGTGTCTGAAGCAGGAAACCACTATAAGGGTGTGATAAACTATTTATGTATGCCCTTGGTATGCTGCGATTGAATCCTGCTCTCTAATCTTTTTGGAAATTGAAAA	Fungi	Basidiomycota	Agaricomycetes	Agaricales	Inocybaceae	_	inocybe	JF273524	100	5e-106	99.53
OTU414	2_32224|F|ITS2;size=1040;	LT980359	AATTCTCAACTACATCTCTTTTTGATGTGGCTTGGACAGTGGGGGTTATATTTGCAGGCTTTTGAAAAGAAGTTTGCTCCCCTGAAATGAATTAGTGGTATCTAAGCAGAGACTACTACAGGTGTGATAATTATTTTATGCCTTGGTATACTGCATGCACTGCTTCTAATGACTTTTGTTATTGACCA	Fungi	Basidiomycota	Agaricomycetes	Agaricales	Inocybaceae	Inocybe	inocybe	gb|HQ271361.1	100	1.1e-76	95.24
OTU415	2_34664|F|ITS2;size=135338;	LT979842	CATTCTCAAACCTTCTTGGTTTCTTGACTAAGAAGGCTTTGGACTTTGGAGGCTTTTGCTGGACCTTCCCTTATTGAAGCCCAGCTCCTCTTAAATGAATTAGTGGGGTCTGCTTTGCTGATCCTTGACGTGATAAGATGCTTCTACGTCTTGGGTTTTGCACTGTTTATTCTAGATCCTGCTTCTAATCGTCTTGTAGAAGACAAATGGTCGACTTGACCCACAAA	Fungi	Basidiomycota	Agaricomycetes	Russulales	Russulaceae	Russula	russula-lactarius	KP071170	100	1e-112	99.12
OTU416	2_43868|F|ITS2;size=26624;	LT978750	ACACCTCAACTCCTCATGGCTTGCCATGATGAGCTTGGACATTGGGGGACTTGCTGGCCTGCAGTCAGCTCCTCTCAAATGAATCAGCTTGCCAGTGTTTGGTGGCACCACAGGTGTGATAAACATCTACTCTTGTGGTCCTCCACCATGTAACCTTCAGTGATATGGAGGTTCGCTGGAGCTCACAAATGTCTTTCCTCAGTGAAGACAGCTCTTGATC	Fungi	Basidiomycota	Agaricomycetes	Thelephorales	Thelephoraceae	Tomentella	tomentella-thelephora	gb|DQ974782.1	99.55	2.2e-93	95.46
OTU417	2_44020|F|ITS2;size=2463;	LT978751	ACACCTCAACCTTCGTGGTTTGCCACGATTGGCTTGGACTTTGGAGGTTTTGCTGGCTCCGGTCGGCTCCTCTCAAATGGATCAGCTTACCAGTGTTTGGTGGCGTTGCAGGTGTGATAACTATCTACGCTTGTGGCTGTCTGCCATGCAACCTTCAGCAATGAGGGTTCGCTGGAGCTCACAGATGTCTCTCCTGAGCGAAGACAGCTTTTTGAAC	Fungi	Basidiomycota	Agaricomycetes	Thelephorales	Thelephoraceae	Tomentella	tomentella-thelephora	dbj|AB854722.1	100	1.33e-85	93.64
OTU418	2_44025|F|ITS2;size=42131;	LT978752	ACACCTCAACTCTCATGGTTTGCCATGATGAGCTTGGACTTTGGGGGTCTTGCTGGCCTGTTGGTCGGCTCCTCTCAAATGAATCAGCTTGCCAGTGTTTGGTGGCATCACAGGTGTGATAACTATCTACGCTTGTCGCTGTCCGCCAGGTAACCTTCAGCGATGGAGGTTCGCTGGAGCTCATAGACGTCTCTCCTCAGCGAGGACAGCTTTTGAAC	Fungi	Basidiomycota	Agaricomycetes	Thelephorales	Thelephoraceae	Tomentella	tomentella-thelephora	HE814198	100	3e-108	99.08
OTU419	2_44027|F|ITS2;size=6216;	LT978753	ACACCTCAACTCTCATGGCTCGCCGTGATGAGCTTGGACTTTGGGGGTCTTGCCGGCCTGTAGTTGGCTCCTCTCAAATGAATCAGCTTACCAGTGTTTGGTGGCATCACAGGTGTGATAACTATCTACGCTTGTGGTTCTCCACCAGGTAACCTTCAGCGATGGAGGTTCGCTGGGGCTCATAAATGTCTCTCCTCGGTGGGGACAGCTCTCTGAAC	Fungi	Basidiomycota	Agaricomycetes	Thelephorales	Thelephoraceae	Tomentella	tomentella-thelephora	gb|JQ791173.1	100	6.15e-89	94.5
OTU420	2_44080|F|ITS2;size=2463;	LT978754	ACACCTCAACTCTCATGGCTTGCTGTGATGAGCTTGGACTTTGGGGGTCTTGTTGGCCTGTGAGCCAGCTCCTCTTAAATGAATTAGCTTGCCAGTGTTTGGTGGCATCACAGGTGTGATAACTATCTATGCTTGTGGTTTCCCATCAGATAACCTTCAGTGATGGAGGTTCACTGGGGCTTATAAACATCTCTCCTCGGTGAGGACAGATTTTGACT	Fungi	Basidiomycota	Agaricomycetes	Thelephorales	Thelephoraceae	Tomentella	tomentella-thelephora	KP753365	100	3e-103	97.71
OTU421	2_44173|F|ITS2;size=25590;	LT978755	ACACCTCAACCCTCATGGTTTGCCATGACGGGCTTGGACTTTGGGGGTCTTGCTGGATTGTAGTCAGCTCCCCTTAAACGAATCAGCTTGCCAGTGTTTGGTGGCATCACAGGTGTGATAACTATCTACGCTTGTGGTTTTACATCAGATAACCTTCAGTGATGGAGGTTCACTGGAGCTCATAAAGGTGTCTCTCCTCTGTGAGGACAGCTCTTTGAAT	Fungi	Basidiomycota	Agaricomycetes	Thelephorales	Thelephoraceae	Tomentella	tomentella-thelephora	FR852131	100	3e-109	99.09
OTU422	2_44239|F|ITS2;size=41410;	LT978756	ACACCTCAACTCTCACGGTTCGCCGTGACGAGCTTGGACTTTGGAGGCTTTGCTGGCCTGTGGGTCGGCTCCTCTCAAATGAATCAGCTTACCGGTGTATTGGTGGCGTCACAGGTGTGATAACTATCTACGCTTGCGGTCGCCCGCCAGACAACCTCTGCCATCGTCGGAGGTTTGCCGGAGGCTCACAAACGTCTCCCGAGTGGAGACAGCCTTCTGAAC	Fungi	Basidiomycota	Agaricomycetes	Thelephorales	Thelephoraceae	Tomentella	tomentella-thelephora	emb|LN909605.1	100	3.51e-111	100
OTU423	2_44292|F|ITS2;size=9790;	LT978757	ACACCTCAACTCTCATGGCTTGCCATGATGAGCTTGGACTTTGGGGGTCTTGCTGGCCTGCAGGCCGGCTCCTCTTAAATAAATTAGCTTGCCAGTGTCTGGAGGCATCACAGGTGTGATAACTATCTACGCTTGTGGTTTTCCCTCAGGTAACCTTCAGCAATGGAGGTTCACTGGAGCTCATAAACGTCTCTCCTCAACGAGGACAGATTTTGACC	Fungi	Basidiomycota	Agaricomycetes	Thelephorales	Thelephoraceae	Tomentella	tomentella-thelephora	EU625861	100	2e-91	94.5
OTU424	2_44585|F|ITS2;size=668;	LT978758	ACACCTCAACCCTCATGGTTTGCCATGATGGGCTTGGACTTTGGGGGTCTTGCTGGATTGTGGTCAGCTCCCCTTAAATGAATCAGCTTGCCAGTGTTTGGTGGCATCACAGGTGTGATAACTATCTACGCTTGTGGTTTTACATCAGATAACCTTCAGCAATGGAGGTTCACTGGAGCTCATAAAGGTCTCTCATCTGCAGGGACAGTTCTTTGAAT	Fungi	Basidiomycota	Agaricomycetes	Thelephorales	Thelephoraceae	Tomentella	tomentella-thelephora	FJ196996	99	4e-97	96.3
OTU425	2_44589|F|ITS2;size=215;	LT978759	ACACCTCAACTCTCATGGCCTGCCATGATGAGCTTGGACTTTGGGGGTCTTGCCGGCCTGACCGTCGGCTCCTCTCAAATGAATCAGCTTGCCAGTGTCTGGTGGCGTCACAGGTGTGATAACTATCTACGCTTGTGGCTTTCCACCAAGTAACCTTCAGCGATGAGGGTTCGCTGGGGCTCACAGATGTCTCTCCCTTGGGGAAGACAGCTTTTTGAA	Fungi	Basidiomycota	Agaricomycetes	Thelephorales	Thelephoraceae	Tomentella	tomentella-thelephora	gb|FJ210775.1	100	6.54e-84	93.15
OTU426	2_44733|F|ITS2;size=9955;	LT978760	ACACCTCAACTCCTCATGGTTTTCCGTGATGAGCTTGGACTTTGGGGGTTTTGCTGGCCTACGGTCGGCTCCTCTAAAATGAATCAGCTTTCCAGTGTTTGGTGGGCGTCACAGGTGTGATAACTATCTACGCTTGTGGTTTTTCCACCGGGTAACCTTCAGCAGTGGAGGTTGGCTGGAGCTCATAGACGTCTCTCCTCAGGGAGGACAACCCTTTGAAT	Fungi	Basidiomycota	Agaricomycetes	Thelephorales	Thelephoraceae	Tomentella	tomentella-thelephora	gb|KT692931.1	100	6.1e-94	95.48
OTU427	2_44841|F|ITS2;size=7144;	LT978761	ACACCTCAACTCTCATGGCTTGCCATGATGAGCTTGGACTATGGGGGTCTTGCTGGCCTGTGGTCAGCTCCTCTCAAATGAATCAGCTTGCCAGTGTTTGGTGGCGATCACAGGTGTGATAACTATCTACGCTTGTGGTTTTCCACCAGGTAACCTTCAGCGATGGAGGTTCGCTGGGGCTCATAAACGTCTCTCCTCAGTGAAGACAGCTCTTTGAAC	Fungi	Basidiomycota	Agaricomycetes	Thelephorales	Thelephoraceae	Tomentella	tomentella-thelephora	EF559293	100	3e-103	97.72
OTU428	2_44977|F|ITS2;size=5190;	LT978762	ACACCTCAACTCTCATGGTTTGCCATGATGAGCTTGGACTTTGGGGGTCTTGCTGGCCTGTGGTCGGCTCCTCTCAAACGGATCAGCTTGCCAGTGTTTGGTGGCACCACGGGTGTGATAACTATCTACGCTTGTGGTTTTCCACCAGATAACCTTCAGCAATGGAGGTTCACTGGAGCTCATAAATGTCTCTCCTCAGTGAAGACAGCTCTTTGAAC	Fungi	Basidiomycota	Agaricomycetes	Thelephorales	Thelephoraceae	Tomentella	tomentella-thelephora	emb|FR852143.1	100	6.02e-104	98.62
OTU429	2_45130|F|ITS2;size=31899;	LT978763	ACACCTCAACTCTCGTGGTTTGCCATGATGAGCTTGGACTCTGGAGGTTTTGCTGGTCTTTTCGATCGGCTCCTCTCAAATGAATCAGCTTGCCAGTATCTGGTGGCATCATGGGTGTGATAACTATCTACGCTCAGAGCCGTCCATCAGGCCAACCTTCAGCAATGGAGGTTTGCTGGAGCTCACAAATGTCTCTCCTTGGTGGGGACAGCTTTTTGAAC	Fungi	Basidiomycota	Agaricomycetes	Thelephorales	Thelephoraceae	Tomentella	tomentella-thelephora	JF273549	100	2e-111	99.55
OTU430	2_45386|F|ITS2;size=1625;	LT978764	ATACCTCAACTCTCATGGCTTGCCATGATGAGCTTGGACTTTGGGGGTCTTGTTGGCCTGTGAGCCAGCTCCTCCTAAATGAATTAGCTTGCCGGTGTTTGGTGGCATCACAGGTGTGATAACTATCTACGCTTGTGGTTTCCCCGCCAGGTAATCTTCAGCAATGGAGGTTCACTGGAGCTTATAAACGTCTCTCCTCAGCGAGGACAATTTGACC	Fungi	Basidiomycota	Agaricomycetes	Thelephorales	Thelephoraceae	Tomentella	tomentella-thelephora	JX630406	99	2e-96	96.31
OTU431	2_45662|F|ITS2;size=17142;	LT978765	ACACCTCAACTCTCACGGTTTCTCGTGATGAGCTTGGATGTTGGGGGTTTTGTTGGCTGTGGTCAGCTCCTCTCAAATGAATCAGCTCGCCGGTGTTTGGTGGCATTACGGGTGTGATAACGATCTACGCTCGTGGTTGTTGACCAGGTAACCTCCAGTGATGGAGGTTCACCGGAGCTCATAAACGTCTCTCCTCAGCGAGGACATTTTTTCAA	Fungi	Basidiomycota	Agaricomycetes	Thelephorales	Thelephoraceae	Tomentella	tomentella-thelephora	JN129414	100	3e-108	99.53
OTU432	2_45674|F|ITS2;size=210;	LT978766	ACACCTCAACTCTCATGGCTTGCCATGATGAGCTTGGACTTTGGGGGTCTTGCTGGCCTGCGGTCGGCTCCTCTCAAATGAATCAGCTTGCCAGTGTTTGGTGGCATCACAGGTGTGATAACTATCTGCGCTTGTGGTGTTTCCATCAGATAACCTCTAGTGATAGAGGTTCGCTGGAGCTCATAAATGTCTCTCCTAAGTGAGGACAGGTCTTTTAAT	Fungi	Basidiomycota	Agaricomycetes	Thelephorales	Thelephoraceae	Tomentella	tomentella-thelephora	gb|JQ791173.1	98.17	4.67e-90	95.35
OTU433	2_45692|F|ITS2;size=2934;	LT978767	ACACCTCAACCCTCATGGTTTGCCATGATGGGCTTGGACTTTGGGGGTCTTGCTGGATTATAGTCAGCTCCCCTTAAATGAATCAGCTCACCAGTGTTTGGTGGCACCACAGGTGTGATAATTATCTACGCTTGTGGTTTTACATCAGGTAACCTTCAGAGATGGGGGTTCACTGGGGCTTACAAAAGGTATCTGTCCTCACAGAGGGCAGCTCTTTGAAT	Fungi	Basidiomycota	Agaricomycetes	Thelephorales	Thelephoraceae	Tomentella	tomentella-thelephora	UDB014173	100	2e-91	94.12
OTU434	2_45694|F|ITS2;size=1296;	LT981091	ATATTGTCAACCTCTTTGGTTGGATTTGGGGGTTGTTGGACTCTTTCTTGAGGTCAGCTCCTCTAAAATGCATTAGCAAAACAGTTTGTCAATCGTTCATTGGTGTGATAATTATCTACGCTATTGACGTGAGAAGGCAGGTTTAGCTCATAACAGTCCATTGACTTGGACAAGAACAAATTATTA	Fungi	Basidiomycota	Agaricomycetes	Agaricales	Cortinariaceae	_	cortinarius	gb|EU056963.1	93	1e-45	87
OTU435	2_45777|F|ITS2;size=6101;	LT978768	ACACCTCAACTCTCATGGCTTGCCATGATGAGCTTGGACCTTGGGGGTCTTGCTGGCACCTGCAGGTGTCAGCTCCTCTCAAATGAATCAGCTTGCCAGTGTTTGGTGGCGTCACGGGTGTGATAAATATCTACGCTTGTGGCTTTCCACCAGGTAACCTTCAGCAATGGAGGTTCACTGGAGCTTATAAATGTCTCTCCTTGGTGAGGACAGATTTTGACC	Fungi	Basidiomycota	Agaricomycetes	Thelephorales	Thelephoraceae	Tomentella	tomentella-thelephora	dbj|AB972839.1	100	1.04e-81	92.38
OTU436	2_46226|F|ITS2;size=1676;	LT978769	ACACCTCAACTCATCATGGTTTTCCATGATGAGCTTGGACTTTGGGGGTTCTGCTGGCCTACGGTCAGCTCCTCTAAAATAGATCAGCTTACCAGTGTTTGGTGGGTATCATGGGTGTGATAACTATCTACGCTTATGGTCTTTCCACCAGATAACCTTCAGCAGTGGAGGTTCACTGGAGCTCATAGACGTCTCTCCTCGGTGAGGACAGCCCTTTGAAT	Fungi	Basidiomycota	Agaricomycetes	Thelephorales	Thelephoraceae	Tomentella	tomentella-thelephora	gb|KC191593.1	100	2.84e-92	95.05
OTU437	2_46283|F|ITS2;size=2393;	LT978770	ACACCTCAACTCCCATGGCTTGCCATGGTGAGCTTGGACTTTGGGGGTTTTGCTGGCCTACGGTCGGCTCCTCTCAAATGAATTAGCCTGCCAGTGTTTGGTGGCATCACAGGTGTGATAAATATCTACGCTTGCGATTGCCCACCAGGTAACCTTCAGCAATGGGGGTTCACTGGGGCTCATAGACGTCTTCCCTCCGTGAAGACAATTCTTTAAC	Fungi	Basidiomycota	Agaricomycetes	Thelephorales	Thelephoraceae	Tomentella	tomentella-thelephora	emb|LN911207.1	100	2.21e-88	94.5
OTU438	2_46396|F|ITS2;size=154;	LT978771	ACACCTCAACTCTTCATGGTTTTCCATGATGAGCTTGGACTTTGGGGGGTTTTGCTGGCCTATGGTCAGCTCCTCTAAAATGGATCAGCTTACCAGTGTTTGGTGGGTACCATGGGTGTGATAACTATCTACGCTCGTGGTTTTCTGCCGGATAACCTTCAGCAGTTGGAGGTTCACTGGAGCTCATAGATGTCTCTCCTCAGCGAGGACAGCCCTTTGAAT	Fungi	Basidiomycota	Agaricomycetes	Thelephorales	Thelephoraceae	Tomentella	tomentella-thelephora	gb|KJ792669.1	100	1.68e-89	94.17
OTU439	2_46595|F|ITS2;size=100;	LT978772	ACATCTCAACTCTCATGGCTTGCCGTGATGAGCTTGGACTTTGGGGGTCTTGCTGGCCTGTGGGTCAGCTCCTCTCAAACGGATCAGCTTGCCAGTGTTTGGTGGTGTCCCAGGTGTGATAACTATCTACGCTTGTGGTCTTCTGCCAGGCAACCTTCAGCAATGGGGGTTCACTGGAGCTCACAAATGTCTCTCCTCGGTGAGGACAGCTCTTTGAAT	Fungi	Basidiomycota	Agaricomycetes	Thelephorales	Thelephoraceae	Tomentella	tomentella-thelephora	AB848681	99	1e-88	93.64
OTU440	2_46752|F|ITS2;size=31794;	LT978773	ACACCTCAACCCTCGTGGTTTTGCCACGATCGGCTTGGACTTTGGAGGTTTTGCTGGCCCCAGTGGTCAGCTCCTCTCAAACGAATCAGCTTACCAGTGTTTGGTGGCGTCGCAGGTGTGATAACTATCTACGCTTGCGGCCGTCTGCCATGTAACCTTCAGCGATGAGGGTTTGCTGGGGGCTCACAGATGTCTCTCCTGAGTGAAGACAGCTTTTTGATC	Fungi	Basidiomycota	Agaricomycetes	Thelephorales	Thelephoraceae	Tomentella	tomentella-thelephora	gb|JQ991886.1	100	6.15e-89	94.14
OTU441	2_46842|F|ITS2;size=183458;	LT979758	AAACCTCGGATCGAGACTTCGACCTCGTCGGAGATCGATCTGGACTATGGGAGTCTGCGGGCGAAGCCTGGCTTCGTCGGCTCTCCTCAAAAGCATTAGCCGTGGGTGGTTAGCCTGGCATGGCACGGCCTCTTCGACGTCATAACGATCGTCGTGGGCTGGAAGTGCGTGGCTCGACGGACCCATGCTTCTCGAATCTCGCGAGCCCGTCCCCCGCGACGGCCGCGCTCCATCGAA	Fungi	Basidiomycota	Agaricomycetes	Boletales	Sclerodermataceae	Scleroderma	pisolithus-scleroderma	JX434680	100	1e-118	99.16
OTU442	2_47114|F|ITS2;size=38427;	LT980934	ACACCTCAACCGTTGTGGTTCACCACAATCGGCTTGGACTTTTGGAGGGTTTTGCTGGCCCCTTTGTGTGGGGTCGGCTCCTCTCAAACGAATCAGCTTACCAGTGTTTGGTGATGTTGCAGGTGTGATAACTATCTACGCTTGCAGCCGTCAACCATGCAACCTTCAGTGATGGGGGTTCGCTGGGGCTCACAGATGTCTCTCCTGAGCGAAGACAGCTTTTTGGAA	Fungi	Basidiomycota	Agaricomycetes	Thelephorales	Thelephoraceae	_	tomentella-thelephora	DQ377429	99	1e-77	90.27
OTU443	2_47183|F|ITS2;size=19822;	LT978774	ACACCTCAACTCCTCATGGCTTGCCATGACGAGCTTGGACTTTGGGGGTCTTGCTGGCCTGCGGTCGGCTCCTCTCAAATGGATCAGCTTGCCGGTGTTTGGTGGCATCACGGGTGTGATAACTATCTACGCTTGTGGTTTTCCACCAGATGGCCCTCAGCGATGGGGGCTCACCGGGGCTCATAAATGTCTCTCCTCGGTGAGGACATCTCTTTGAAC	Fungi	Basidiomycota	Agaricomycetes	Thelephorales	Thelephoraceae	Tomentella	tomentella-thelephora	gb|KJ008759.1	100	2.88e-82	92.69
OTU444	2_47189|F|ITS2;size=121;	LT978775	ACACCTCAACTCTCATGGCCTCGCCATGACGAGCTTGGACTTTGAGGGGTCTTGCTGGCCTATGCGTGTCAGCTCCTTTCAAATGAATCGGCTTGCCAGTGTTTGGTGGCATCACAGGTGTGATAACTATCTACGCTTGTGGCTTTCCACCAGGTAACCTTCAGTGAATGAAGGTTCGCTGGGGCTCATAAACATGTCTCTCCTCACCGAGGACAGCTCTTTGGAC	Fungi	Basidiomycota	Agaricomycetes	Thelephorales	Thelephoraceae	Tomentella	tomentella-thelephora	gb|JX625338.1	98.67	6.54e-84	92.86
OTU445	2_47252|F|ITS2;size=14700;	LT978776	ACACCTCAACTCCCATGGTTCGCCATGGCGAGCTTGGACTTTGGGGGTTTTGCTGGCCCATGGTCGGCTCCTCTCAAATGAATCAGCCTGCCAGTGTTTGGTGGCATCACAGGTGTGATAAATATCTACGCTTGCGATTGCCCACCAGGTAACCTTCAGCAATGGGGGTTCGCTGGGGCTCATAGACGTCTCTCCCTCGGCGAGGACAGCTTTTTTAAC	Fungi	Basidiomycota	Agaricomycetes	Thelephorales	Thelephoraceae	Tomentella	tomentella-thelephora	emb|LN909647.1	100	1.67e-104	98.63
OTU446	2_47305|F|ITS2;size=12113;	LT978777	ACACCTCAACTCTTCATGGTTTTCCATGATGAGCTTGGACTTTGGGGGTCTTGCTGGCCTATGGTCGGCTCCTCTAAAATGAATCAGCTTGCCAGTGTTTGGTGGGCATCACAGGTGTGATAACTATCTACGCTTGTGGTTTTCCCACCAGGTAACCTTCAGCAGTGGAGGTTCACTGGAGCTCACAGATGGTCTCTCCTCAGCGAGGATGACTCTTTGAAT	Fungi	Basidiomycota	Agaricomycetes	Thelephorales	Thelephoraceae	Tomentella	tomentella-thelephora	HQ433170	100	1e-98	95.95
OTU447	2_47365|F|ITS2;size=900;	LT978778	ACACCTCAACTCTCATGGTCCGCCATGATGAGCTTGGACTCTGGGGGTCTTGCCGGCCTAGCGTCGGCTCCTCTCAAATGGATCAGCTTGCCAGTGTTTGGTGGCGTCACAGGTGTGATAACTATCTACGCTTGTGGTTTCCACCATGCAACCTTCAGTGATGGAGGTTCGCTGGAGCTCACAGATGTCTCTCCTTGGGGAGGACAGCTTTTTGAAC	Fungi	Basidiomycota	Agaricomycetes	Thelephorales	Thelephoraceae	Tomentella	tomentella-thelephora	gb|KP814535.1	100	4.68e-100	97.7
OTU448	2_47786|F|ITS2;size=5618;	LT978779	ACACCTCAACTCTCATGGTTTGCCATGATGAGCTTGGACTTTGGGGGTCTTGCTGGCCTGCAGTCAGCTCCTCTCAAATGAATCAGCTTTCCAGTGTTTGGTGGCATCACAGTGTGATAACTATCTACGCTTGTGGTTTTCTGCCAGGTAACCTTCGGCAATGGGGGTTCGCTGGGGCTCATAAACGTCTCTCCTCAGCGAAGACAGCTTTGTGAAC	Fungi	Basidiomycota	Agaricomycetes	Thelephorales	Thelephoraceae	Tomentella	tomentella-thelephora	emb|LN911822.1	100	4.65e-105	99.08
OTU449	2_48013|F|ITS2;size=260;	LT978780	ACACCTCAACTCTCATGGCTTGCCATGATGAGCTTGGACTCTGGAGGTCTTGCTGGCTCATGGTCGGCTCCTCTCAAATGGATTAGCTTGCCAGTGTTTGGTGGCATCACAGGTGTGATAACTATCTGCGCTTGTGGTTTCCCATCAGATAACCTTCAGTGATGGAGGTTCGCTGGAGCTCATAAACGTCTCTCCTAAGTGAAGACAACCCTTTGAAT	Fungi	Basidiomycota	Agaricomycetes	Thelephorales	Thelephoraceae	Tomentella	tomentella-thelephora	gb|JX630659.1	99.54	4.67e-90	94.93
OTU450	2_48268|F|ITS2;size=333;	LT978781	ACATCTCAACTCTCATGGTCTGCCATGATGAGCTTGGACTTTGGGGGTCTTGCTGGCCTAGTGTCGGCTCCTCTCAAATGGATCAGCTTGCCAGTGTTTGGTGGCATCACAGGTGTGATAACTATCTACGCTCGTGGTTCTCTGCCATGTAACCTTCAGTGATGGAGGTTCGCTGGAGCTCACAGATGTCTCTCCTTGGGGAGGACAGCTTTTTGAAC	Fungi	Basidiomycota	Agaricomycetes	Thelephorales	Thelephoraceae	Tomentella	tomentella-thelephora	FN397409	100	3e-103	97.72
OTU451	2_49045|F|ITS2;size=4206;	LT978782	ACACCTCAACCCTCATGGTTTGCCGTGACGGGCTTGGACTTTGGAGGTCTTGCGGGCTTATGGCCGGCTCCTCTCAAATGAATTAGCTTACCGGTGTATGGTGGCATCACGGGTGTGATAATTATCTGCGCTTGTGGTTGTCTGCCAGGTAACCTTCAACCTTGGAGGTTTGCTGGGGCTTACAAATGTCTCTCCTCAGTGAAGACAGCTTTCTGAAC	Fungi	Basidiomycota	Agaricomycetes	Thelephorales	Thelephoraceae	Tomentella	tomentella-thelephora	GQ240903	100	7e-110	99.54
OTU452	2_49654|F|ITS2;size=482;	LT979431	ACACCTCAACTCTCATGGTTCTCCATGATGAGCTTGGATTTCTGGGGGTTTTGCTGGCCTTTGGTTGGCTCCTCTCAAATGGATCAGCTTTCCAGTGTTTGGTGGCGCTATGGGTGTGATAACTATCTACGCTTGTGGTCGTCTGCCAGGTAACCTTTGGTGACAGAGGTTCGCTGGGGCTTACAAACGTCTCTCCTCAGTGAAGACAGCTTTTGATC	Fungi	Basidiomycota	Agaricomycetes	Thelephorales	Thelephoraceae	Thelephora	tomentella-thelephora	emb|LN911994.1	100	2.77e-97	96.79
OTU453	2_49940|F|ITS2;size=8604;	LT978783	ACACCTCAACTCTCATGGCTTGCCATGATGAGCTTGGACTTTGGGGGTCTTGCTGGCCTGCTGTCAGCTCCTCTCAAATCTATCAGCTTGCCAGTGTTTGGTGGCATCACGGGTGTGATAACTATCTACGCTTGTGGTGTTTCCACCAGGTGTCCTCCAGCAATGGGGGCCTCTGGAGCTCATAAACGTCTCTCCGGGGACAGCTTTTTGAAC	Fungi	Basidiomycota	Agaricomycetes	Thelephorales	Thelephoraceae	Tomentella	tomentella-thelephora	dbj|AB848665.1	100	7.89e-93	96.24
OTU454	2_50108|F|ITS2;size=2031;	LT978784	ACACCTCAACTCCTCATGGTTTTTCTATGATGAGCTTGGACTTTGGGGGTTTGCTGGCCCATTCGGTCAGCTCCTCTCAAATGAATCAGCTTTCCAGTGTTTGGTGGCACCATGGGTGTGATAACAATCTACACTTGAGGTTTTCCACCGGGCAACCCCCAGTAAATGGGGGTTCGCTGGGGCTCATAAATGTCTTTCTTCAGTGAGGACAGCTCTTTGAAT	Fungi	Basidiomycota	Agaricomycetes	Thelephorales	Thelephoraceae	Tomentella	tomentella-thelephora	gb|JX625359.1	100	6.49e-89	94.14
OTU455	2_50128|F|ITS2;size=4120;	LT978785	AAACCTCAACTCCTCATGGCTTGCCATGATGAGCTTGGACTTGGGGGTCTTGCTGGCCTGCAGTCAGCTCCTCTCAAATAAATCAGCTTGCCAGTGTTTGGTGGCACCACAGGTGTGATAAACATCTATGCTTGTGGTTGTCTGCCATGGAACCTTCAGCGATGGAGGTTTGCTGGAGCTCACAAATGTCTTTCCTTGGTGAAGACAGCTATTTGATT	Fungi	Basidiomycota	Agaricomycetes	Thelephorales	Thelephoraceae	Tomentella	tomentella-thelephora	emb|FR852174.1	99.08	1.69e-84	93.52
OTU456	2_50177|F|ITS2;size=12343;	LT978786	ACACCTCAACTCTCATGGCCTTGCCATGACGAGCTTGGACTTTGGGGGTCTTGCTGGCCTATTATGGGTCAGCTCCTTTCAAATGAATCAGCTTGCCAGTGTTTGGTGGCATCACAGGTGTGATAACTATCTACGCTTGTGGTTTTCCACCGGGTAACCTTCAGTGATGAAGGTTCGCTGGGGCTCATAAAAGTGTCTCTCCTCACCGAGGACAGCTCTTTGAAC	Fungi	Basidiomycota	Agaricomycetes	Thelephorales	Thelephoraceae	Tomentella	tomentella-thelephora	gb|JX625338.1	100	4.75e-90	94.22
OTU457	2_50561|F|ITS2;size=49;	LT978787	ACACCTCAACCCTCGTGGTTTGCCATGATGGGCTTGGACTTTGGAGGTTTTGCTGGCTCCCTGTAGTCGGCTCCTCTCAAATGAATCAGCTTACCAGTGTTTGGTGGCGTCGCAGGTGTGATAACTATCTACGCTTGTGGCCGTCCGCCGTGCAACCTTCAGCGATGAGGGTTCGCTGGGGCTTACAGATGTCTTTCCCTAGTGAAGACAGCTTTTTGATC	Fungi	Basidiomycota	Agaricomycetes	Thelephorales	Thelephoraceae	Tomentella	tomentella-thelephora	gb|JQ991886.1	100	2.21e-88	94.12
OTU458	2_51220|F|ITS2;size=354;	LT978788	ACACCTCAACTCTCATGGTTTGCCATGATGAGCTTGGACTCTGGGGGTCTTGCTGGCTCATGGTCAGCTCCTCTTAAATGGATCAGCTTTCCAGTGTTTGGTGGCATCACAGGTGTGATAACTATCTACGCTTGTGGTGTCCTCCCAGGTAATCTCCAGCAATGGAGGTCACTGGAGCTAATAAATGCACATCTCTCGTTGTAGAGATGGCCTTTTAGAT	Fungi	Basidiomycota	Agaricomycetes	Thelephorales	Thelephoraceae	Tomentella	tomentella-thelephora	gb|GQ223454.1	100	9.97e-97	96.38
OTU459	2_51317|F|ITS2;size=3712;	LT978789	ACACCTCAACCCTCGTGGTTTGCCACGATCGGCTTGGACTTTGGAGGTTTTGCTGGCCTGTGTGGTTAGCTCCTCTCAAATGAATCAGCTTACCAGTGTTTGGTGGAGCCACAGGCGTGATAAATATCTACGCTTGCGGCCGTCTGCCATGCAACCTTCAGCGATGAAGGTTCACTGGGGGCTCACAGATGTCTCTCCTGAGTGAAGACAGCTTTTTTAAC	Fungi	Basidiomycota	Agaricomycetes	Thelephorales	Thelephoraceae	Tomentella	tomentella-thelephora	gb|JQ991886.1	98.19	1.84e-74	90.78
OTU460	2_51545|F|ITS2;size=958;	LT978790	ACACATCAACTCTCATGGCTTGCCGTGACGAGCTTGGACTTTGGAGGTCTTGCCGGCCTGTGGCCGGCTCCTCTCAAATGAATTAGCCTGCCGGTGTTTGGTGGGATCACAGGTGTGATAACTATCTACGCTTGTGGTTTTCCACCAGGTAACCCTCAGCGATGGAGGTTCACTGGAGCTTATAAACGTCTCTCCTCAGCGAGGACAGGTTTTGACC	Fungi	Basidiomycota	Agaricomycetes	Thelephorales	Thelephoraceae	Tomentella	tomentella-thelephora	UDB013033	100	6e-101	97.24
OTU461	2_51589|F|ITS2;size=15925;	LT980935	ACACCTCAACTCTCATGGCTTGCCATGATGAGCTTGGAATTTGGGGGTTTTGCTGGCCTGTGTGGTCAGCTCCTCTTAAACAAATCAGCTTGCTAGCGTTTGGTGGCATTGTGGGTGTGATAACTATCTACACCCATGGTCGTTTGCCAGGTAACCTTCAGCAGTGGAGGTTCGCTGGAGCTCATAAATGTCTCTCCTCAGTGTGAGACAGCATTTTGAAC	Fungi	Basidiomycota	Agaricomycetes	Thelephorales	Thelephoraceae	_	tomentella-thelephora	KP753361	100	3e-98	95.93
OTU462	2_51642|F|ITS2;size=28744;	LT978791	ACACCTCAACTCTCATGGCTTGCCGTGATGAGCTTGGACTTTGGGGGTCTTGCTGGCCTGTGGTCGGCTCCTCTCAAATGAATTAGCCTGCCAGTGTTTGGTGGGATCACAGGTGTGATAACTATCTACGCTTGTGGTTTTCCACCAGGTAACCCTCAGCAATGGAGGTTCACTGGAGCTTATAAACGTCTCTCCTCAGCGAGGACAGGTTTTGACC	Fungi	Basidiomycota	Agaricomycetes	Thelephorales	Thelephoraceae	Tomentella	tomentella-thelephora	UDB013033	100	3e-109	99.54
OTU463	2_51903|F|ITS2;size=1311;	LT978792	ACACCTCAACTCTCATGGTTTGCCATGATGAGCTTGGACTTTGGAGGTTTTGCTGGCCTTTGGTCGGCTCCTCTCAAACGGATCAGCTTTCCAGTGTTTGGTGGCGTCACGGGTGTGATAACTATCTACGCCTGTGGTTTTCTGCCAGATAACCTTCAGCGATGGAGGTTCGCTGGGGCTCATAAATGTCTCTCTTCAGTGGAGACAGCTTTTTGGAC	Fungi	Basidiomycota	Agaricomycetes	Thelephorales	Thelephoraceae	Tomentella	tomentella-thelephora	dbj|LC013846.1	100	2.78e-107	99.54
OTU464	2_52036|F|ITS2;size=4324;	LT978793	ACACCTCAACTCTTCATGGTTTTTCTGTGATGAGCTTGGACTTTGGGGGTTTTGCTGGCCCTATGGTCAGCTCCTCTAAAATGAATCAGCTTGCCAGTGTTTGGTGGGCATCACGGGTGTGATAACTATCTACGCTTGTGGTTTTCCACCAGGTAACCTTCAGCAATGGAGGTTCGCTGGAGCTCACAGATGTCTCTCTTCGGAGGATGACCCTTTGAAT	Fungi	Basidiomycota	Agaricomycetes	Thelephorales	Thelephoraceae	Tomentella	tomentella-thelephora	FJ378804	100	3e-99	96.4
OTU465	2_52192|F|ITS2;size=7965;	LT978794	ACACCTCAACTCTCATGGTTTTACCGTGATGAGCTTGGACTTTGGGGGTCTTGCTGGCCAGTGGTCAGCTCCTCTCAAATGAATCAGCTTGCCAGTGTTTGGTGGCATCACAGGTGTGATAACTATCTACGCTTGTGGTTTCCTGCCAGGTGCCCTTCAGTGATGAAGGGTCGCTGGAGCTTATAAATGTCTCTCCCCCAGTGAGGACAACTTCTTGAAT	Fungi	Basidiomycota	Agaricomycetes	Thelephorales	Thelephoraceae	Tomentella	tomentella-thelephora	emb|LN912147.1	99.55	1.66e-99	97.26
OTU466	2_52359|F|ITS2;size=27943;	LT979432	ACACCTCAACTCTCTACGGTTTGCCGTGGAGAGCTTGGACTTTGGAGGTTTGCTGGCCCTCGGTCGGCTCCTCTCAAACGAATCAGCTTCCCAGTGTTTGGTGGCGTCACGGGTGTGATAACTATCTACGCTCGCGATCCGTCCGCCTCGCAACCTTCAGCGATGGAGGTTCGCTGGAGCTCAAAAACGTCTCTCCTCAGCGAAGACAGCTTTTCTGAC	Fungi	Basidiomycota	Agaricomycetes	Thelephorales	Thelephoraceae	Thelephora	tomentella-thelephora	gb|JQ991848.1	100	1.29e-105	99.09
OTU467	2_52656|F|ITS2;size=89415;	LT979843	ATATCCTCAACCTTCTTGGTTTCTTGATCAAGAAGGCTTGGAATTTGGAGGCTTTTGCTGGCTTCCTTCAAAGCCAGCTCCTCTTAAATGAATTAGTAGGGTCCACTTTGCTGATCCTTGACGTGATAAGATACTTTCTACGTCTTGGGTTTTTGCAAACCTGCTTCTAACTGTCTCGTCGGAGACTGAACTCATATATATTAAAC	Fungi	Basidiomycota	Agaricomycetes	Russulales	Russulaceae	Russula	russula-lactarius	gb|KP866128.1	100	2.8e-102	100
OTU468	2_52669|F|ITS2;size=3860;	LT978795	ACACCTCAACTCTCATGGCTTGCCTGTGATGAGCTTGGACTCTGGGGGTCTTGCTGGCCTATGGGTCGGCTCCCCTCAAATGAATCAGCTTGCCAGTGTTTGGTGGCATCACAGGTGTGATAACTATCTACGCTTGTGGTTTGCTGCCAGGTAACCTTCAGCGATGGAGGTTCTCTGGGGCTTACAAAAGTCTCTCCTCGGTGAGGACAGCTCTTTGAAC	Fungi	Basidiomycota	Agaricomycetes	Thelephorales	Thelephoraceae	Tomentella	tomentella-thelephora	UDB013202	100	2e-105	98.18
OTU469	2_53084|F|ITS2;size=2899;	LT978796	ACACCTCAACTCTCATGGTTTGCCATGATGAGCTTGGACTTTGGGGGTCTTGCTGGCCTGCAGTCAGCTCCTCTCAAATGAATCAGCTTTCCAGTGTTTGGCAGCATCACAGGTGTGATAACTATCTACGCTTGTGGTTTTCTGCCAGGTAACCTTCAGCAATGCGGGTTCGCTGGGGCTCATAAATGTCTCTCCTCGGTGAAGACAGCTTTGTGAAC	Fungi	Basidiomycota	Agaricomycetes	Thelephorales	Thelephoraceae	Tomentella	tomentella-thelephora	HE814073	100	7e-105	98.17
OTU470	2_53120|F|ITS2;size=11052;	LT980936	ACACCTCAACCGTTGTGGTTTACCACAATCGGCTTGGACTTTTGGAGGGTTTTGCTGGCCCCTTGTGTGGGGTCGGCTCCTCTCAAACAAATCAGCTTACCAGTGTTTGGTGATGTTGCAGGTGTGATAACTATCTACGCTTGCAGCTGTCTACCATGCAACCTTCAGCGATGGGGGTTCGCTGGGGCTCACAGATGTCTCTCCTGAGCGAAGACAGCTTTTTGGAA	Fungi	Basidiomycota	Agaricomycetes	Thelephorales	Thelephoraceae	_	tomentella-thelephora	DQ377429	99	5e-77	90.22
OTU471	2_53338|F|ITS2;size=27895;	LT978797	ACACCTCAACCCTCGTGGTTTGCCACGACCGGCTTGGACTTTGGAGGTTTTGCTGGCCCCTGTGGTCAGCTCCTCTCAAATGAATCAGCTTACCAGTGTTTGGTGGCGTCGCAGGTGTGATAACTATCTACGCTTGCGGCCGTCTGCCACGTAACCTTCAGTGATGAGGGTTCGCTGGGGCTCACAGATGTCTCTCCTGAGTGAAGACAGCTTTTTGATC	Fungi	Basidiomycota	Agaricomycetes	Thelephorales	Thelephoraceae	Tomentella	tomentella-thelephora	gb|JQ991886.1	100	1.02e-91	95
OTU472	20_435588|F|ITS2;size=4325;	LT979844	AATTCTCAAAAACCATTTCTTTTGGTCATTTTTGACCATGGAAAGGATTTTGGACTTGGAGGCCTTTTGCTGGTTTCACCTCGAAGCGAGCTCCTCCCAAATGTATTAGTGGGGTCTGCATTGTCGGTCCTTGGCGTGATAAGTTGTTTCTACGTCTTGGATCTTTGGCGCTGTACACCTGCTTCTAACCGTCTCATTGACAACGATGGTGTTTTGGTCACCGCCGGTTTTTATCGGTGGGAGGCTTGACCCACAAAACAAA	Fungi	Basidiomycota	Agaricomycetes	Russulales	Russulaceae	Russula	russula-lactarius	gb|HQ604844.1	100	7.67e-113	95.44
OTU473	20_435953|F|ITS2;size=209;	LT980241	AAACCTCAACCTCCTTGGTTTCTTCTGGACACCAAAGGAGGCTTGGACTTTGGAGGCCTTTGCTGGCGTCTTTCTCTTTTGAAGGCCAGCTCCTCCTAAATCGATTAGCGGGGTCCTCTTTGCTGATCCTTGACGTGTGATAAGATGTTTCCATGTCTTGGCTTCTGGCTCTGTTGCCTTTAGGACCCGCTTCTAACCGTCTCGGCCTTGTGCATCGAGACAACGTTTGAGCGTGTCTCCCTTCTCGGGAAACGCTCTCAACCCCACGAAC	Fungi	Basidiomycota	Agaricomycetes	Russulales	Russulaceae	Lactarius	russula-lactarius	emb|LN911596.1	100	3.6e-106	92.99
OTU474	20_435975|F|ITS2;size=90;	LT980242	AAATCTCAACCTTCTTGGTTCCTTCTGGACACCAAAGGAGGCTTGGACTTTGGAGGCCTTTGCTGGCGTCTCTCTCTTTTGAAGGCCAGCTCCTCCTAAATTGATTAGTGGGGTCCTCTTTGCCAATCCTTGACATGTGATAAGATGTTTTCCATGTCTTGGCTTCTGGCTCTGTTGCCTTTGGGACCCGCTTCTAACCGTCTCAGCCTTGTGCATCGAGACAACGTTTGAGCGTGTCTCCCTTCTCGGGAAATGCTCTCAACCCCATGAAC	Fungi	Basidiomycota	Agaricomycetes	Russulales	Russulaceae	Lactarius	russula-lactarius	gb|KJ769279.1	100	2.78e-107	93.02
OTU475	20_436697|F|ITS2;size=195;	LT978798	ACACCTCAACCCCTCATGGTTTACCATGATGGGCTTGGACTTTGGGGGTCTTGCTGGATTATAGTCAGCTCCCCTTAAATGAATCAGCTTGCCAGTGTTTGGTGGCATCACAGGTGTGATAATTATCTACGCTTGTGGTTTTTTACATCAAGTAACCTTCAGAGATGGGGGTTCACTGGGGCTCACAAAAGGTGTCTCTCCTCTGTGAGGAACAGCTCTTTGAAC	Fungi	Basidiomycota	Agaricomycetes	Thelephorales	Thelephoraceae	Tomentella	tomentella-thelephora	gb|JQ991880.1	100	4.57e-105	98.22
OTU476	20_439206|F|ITS2;size=120;	LT979516	GTACTCTCACACTTCCGATCTTTGGATTAGGAGTGGTGGACTTGGGTGTTGCTGCTTCACTGCGGCTCACCTCAAATGGATTAGTGCAACTCTTGGTTGGACATAGTACGGCGTGATAAGTGTCTTCGCCGGCGCCTCGTAACAGAGGGTGGCCGATCGGGAGCTCTGTGCTTCAAACCGTCTTCGGACAATTACTGACA	Fungi	Basidiomycota	Agaricomycetes	Sebacinales	Sebacinaceae	Sebacina	sebacina	emb|LN910194.1	99.5	2.14e-98	100
OTU477	20_452511|F|ITS2;size=40;	LT979845	AATTCTCAAAGTCCTTTTCTTTGATTGTTTTGATCAAGAAAAGGATTTTGGACTTGGAGGATCATCAATGCTCACTTTTTGAAAGTGAGCTCCTCTTAAATGAATTAGTGGGGGTTTGCTTTGCTGATCCTTGACGTGATAAGGTGATTCTACGTTTTGGATTTAGCACTGTCCCTTTAGAACACCCGCTTCTAATTGTCCTATGGACGACGATGGTGTTCTGGTCACACCGGCTGGAACCCACACAAAGAAAAA	Fungi	Basidiomycota	Agaricomycetes	Russulales	Russulaceae	Russula	russula-lactarius	AB509876	100	1e-108	94.51
OTU478	20_452711|F|ITS2;size=237;	LT978605	AAAACCATCTCACGGATAGTGTGGTATTGGTAGAAGTAGGTAGTATTAGTAGTACTTGATCTTACTCTACCGAAATGAATAGGCCAGAAAAGTGAACCATGGTAACAGACTCTCAGAGTGTTTTAAAATGCTATACTAGTCTAAGTCTGGTTTGAATCTGAGTCTGTGGACCCCTATATAGTTCAAACAAAAGA	Fungi	Ascomycota	Pezizomycetes	Pezizales	Tuberaceae	Tuber	tuber-helvella	gb|HM485352.1	73.2	4.32e-45	90.85
OTU479	20_452991|F|ITS2;size=1971;	LT978799	ACACCTCAACCCTCATGGTTTACCATGGTGGGCTTGGACTTTGGGGGTCTTGCTGGATTGTAGTCAGCTCCCCTTAAATAAATCAGCTTGCCAGTGTCTGGTGGCATCACAGGTGTGATAATTATCTATGCTTGTGGTTTTACATCAGGTAACCTTCAGAGATGGGGGTTCACTGGGGCTCACAAAATGTCTCTCCTCAGTGAGGATGGCTCTTTGAAT	Fungi	Basidiomycota	Agaricomycetes	Thelephorales	Thelephoraceae	Tomentella	tomentella-thelephora	UDB004963	100	2e-105	98.17
OTU480	20_453010|F|ITS2;size=1251;	LT980331	AATTCTCAACCTTTCCAGCTTTTATTAGTTTGGTCAGGCTTGGATGTGGGGGTTGCAGGCTTTCATTTACTCTGCTCTCCTTAAATGCATTAGCGGAACTTTTGTGGACCGTCTATTGGTGTGATAATTATCTACACCGTGGATGTAAAGCAGTTTTTATAAGGTTCAGCTTCTAACTGTCCATTGACTTGGACAATTTTGACA	Fungi	Basidiomycota	Agaricomycetes	Agaricales	Hydnangiaceae	Laccaria	laccaria	JQ670897	100	9e-104	100
OTU481	20_454269|F|ITS2;size=90;	LT980563	ATATATCAACCTCTTTAGCTTTTGTTTATTGAGTGTTGGATGTGAGGGTCTTTTTGCTGGTCTTTTTTAAATCAGCTCCCTTCAAATGCATTAGCAGAACAATTTGTTGATCTTTCATTAGTGTGATAATTATCTACGCTATTGATGTTAAGCAAGTTTCAGCTTCTAATAATCCATTGACTTGGATAATTTTTATTTATTA	Fungi	Basidiomycota	Agaricomycetes	Agaricales	Cortinariaceae	Cortinarius	cortinarius	AB509537	100	7e-95	98.02
OTU482	20_454698|F|ITS2;size=1353;	LT980917	AATTCTCAACCTTATTAGCTTTTGTTGATAATGGATTGGATGTGGGGGTTTCTTTTGCTGGCTTCTTCACAGATATCAGCTCCCCTTAAATGCATTAGCTGGTGCCCCGCGTGGACCATCTATTGGTGTGATAATTATCTACGCCGTGGATGTCTGCAATCATATGGGTTTTGCACTGCTTCTAACCGTCTGTTCATTCGGACAATACATGACA	Fungi	Basidiomycota	Agaricomycetes	Agaricales	Strophariaceae	Alnicola	hebeloma-alnicola	UDB014075	100	3e-109	100
OTU483	20_455302|F|ITS2;size=2138;	LT980332	AATTCTCAACCTTTCCAGCTTTTATCAGTTTGGTCAGGCTTGGATGTGGGGGTTGCAGGCTTCATTTACTTTATGAGCTCTGCTCTCCTTAAATGCATTAGCGGAACTTTTGTGGACCGTCTATTGGTGTGATAATTATCTACACCGTGGATGTAAAGCAGGTTTATAAAGTTCAGCTTCTAACTGTCTATTGACTTGGACAATTTTGACA	Fungi	Basidiomycota	Agaricomycetes	Agaricales	Hydnangiaceae	Laccaria	laccaria	GQ240911	100	1e-107	100
OTU484	20_456627|F|ITS2;size=9919;	LT980333	AATTCTCAACCTTTCCAGCTTTTATTAGCTTGGTTAGGCTTGGATGTGGGGGTTGCGGGCTTTATTAATTGAAGTCGGCTCTCCTTAAATGCATTAGCAGAACTTTTGTGGACTGTCTATTGGTGTGATAATTATCTATACCGTGGATGTGAAGCAGCTTTATAAAGTTCAGCTTCTAACTGTCCATTGACTTGGACAATTATTTTTTGACA	Fungi	Basidiomycota	Agaricomycetes	Agaricales	Hydnangiaceae	Laccaria	laccaria	JX198545	95	3e-88	96.02
OTU485	20_456714|F|ITS2;size=35557;	LT979846	ACACATCCTCAACCTTCTTTTGGTTTTCTTGACCGGAGGAAGGCTTGGACTTTGGAGGTCTTTCATTGCTGGTATCCTTTTGGAGCCAGCTCCTCCTAAATGAATTAGTGGGATTCGCTTTGGTGATCCTCGACGTGATAAGCATTATTCTACGTCTCGGGTTTTCGAAGTGCCTGCTTCTAACCGTCTTTAAACAAAGACAATGACCACAAAA	Fungi	Basidiomycota	Agaricomycetes	Russulales	Russulaceae	Russula	russula-lactarius	KF361760	100	6e-106	99.07
OTU486	20_458190|F|ITS2;size=42510;	LT979847	ACATCCCTCAACCTTTCTTTGGTTTCTTGACCAAGGAAAGGCTTGGACTTTGGAGGTTATTATTTTTGCTGGCTTTCTCAGAAGTCAGCTCCTCCTAAATGAATTAGTAGGGTCTGCTTTGCAGATCCTTGATGTGATAAGGTATTTCTACATCTTGGATCATGCACAAGTCAGTTTTGGATTCTGCTTCTAACCGTCTTTGCAAAAGACAATGTTGCGAA	Fungi	Basidiomycota	Agaricomycetes	Russulales	Russulaceae	Russula	russula-lactarius	gb|JQ991798.1	100	1.01e-101	97.74
OTU487	20_460163|F|ITS2;size=1393;	LT980564	ATATATATATCAAACTTCTCTTGTTGAGTGGTTTGGATGTGGGGGTTTGCTGGCCTTTTAAAGTGTTCAGCTCCTCTGAAATGCATTAGCAGAACAAAAACCTGTTCATTGGCATGATAACTATCTATGCTATTGAATGTGGGGGGCAGTTCAGCTTTCTAACAGTCCTAGGACAATTAATCATTA	Fungi	Basidiomycota	Agaricomycetes	Agaricales	Cortinariaceae	Cortinarius	cortinarius	gb|KM226491.1	100	3.7e-86	98.39
OTU488	20_460265|F|ITS2;size=98;	LT980968	AATTCTCAACCTTCCCAATTTTGGGATGGCTTGGACTTTGGAGGTTTTTGCTGGCTTCTTTAGAGAAGCCGGCTCCTCTTAAATAAATTAGTGGGGTCCTCTTCACCGATCCCTCGACGTGATAAGATTTTCTACGTCCGAGGCCTTGGTCTCTGAGACCTGCTTCTAATATACCGTCTCTCCTTAGAGATGTGATTTTGAACC	Fungi	Basidiomycota	Agaricomycetes	Russulales	Russulaceae	_	russula-lactarius	UDB013766	100	2e-50	85.02
OTU489	20_460938|F|ITS2;size=323;	LT981074	CTATACCTCAAGCCCGGCTTGTGTGATGGACTCACTGTCTAATTGGACAGTAGCCCCAAAGGCAGTGGCAGGGTCGCAGTCCGGTCTTTTAAATGCGTATGGGGCATTGTCACCCGCTTGAAAGCTGGCCGACCCTTTAAGCCTATTGTGAGAGAAATCCACAATTGTTTTAATATTTCCT	Fungi	Ascomycota	Eurotiomycetes	Eurotiales	Elaphomycetaceae	_	elaphomyces	HQ541829	94	4e-77	97.08
OTU490	204_4189933|F|ITS2;size=25;	LT978632	AATACCTCTCAAGCATATTTGCTTGGTTGTGGAAGAAGAGTATGCGAGCATTCTCCCTTCTGAAATTGAAAGGCGGATCATAGCATATTCCGTGGCGTAGTAAGTTTATCTTGTCGCTCGGAGTGTGTGCAATTGTCCTGCCATCAAACCCCCAATTCTTCAA	Fungi	Ascomycota	Pezizomycetes	Pezizales	Pyronemataceae	Trichophaea	wilcoxina	JN129415	100	4e-81	100
OTU491	207_4256836|F|ITS2;size=15;	LT981107	AATTCTCAAGATTGGGGGATGCCTTTTTGAAGGTGACCGGTCCCCCAAGTCTTGGTCTTGGGCTCTGCCGTGCCCTTTATTGGAACGGCTGGCCTTAAAAGTATTAGCTGGCCCTCATTATGGGAATTGGTTCTACTCAGCGTGATAATTAATGCTGATGACCGCCGAGGACATCTTTTCCGAAGATGGCCAGTTCTCATTTGGGTTGCTTCTAATCCTGGTTTACAGATGCATATCTGTTCCATGTTCGG	Fungi	Basidiomycota	Agaricomycetes	Cantharellales	Clavulinaceae	_	clavulina	KC348463	73	6e-47	85.95
OTU492	207_4257882|F|ITS2;size=46;	LT978800	ACACCTCAACTCCTCATGGCTTGCCATGATGAGCTTGGACTTGGGGGTCTTGCTGGCCTGCAGTCAGCTCCTCTCAAATAAATCAGCTTGCCAGTGTTTGGTGGCACCACAGGTGTGATAAACATCTATGCTTGTGGTTGTCTGCCATGGAACCTTCAGCAATGGAGGTTTGCTGGAGCTCACAAATGTCTCTCCTGAGCGAGGACAGCTTTTTAAT	Fungi	Basidiomycota	Agaricomycetes	Thelephorales	Thelephoraceae	Tomentella	tomentella-thelephora	gb|JX625353.1	95.85	2.2e-78	92.82
OTU493	207_4259307|F|ITS2;size=29;	LT978801	ACACCTCAACTCTCATGGTTTGCCATGATGAGCTTGGACTTTGGAGGTCTTGCTGGCCTACGGTCGGCTCCTCTTGAATGAATCAGCTTGCCAGTGTTTGGTGGCGTCACAGGTGTGATAACTATCTACGCTTGTGATTTTCTGCCAGGTAACCTTCAGTGATGGAGGTTCGCTGGGGCTCACAAATGTCTTTCCTTGGTGAAGACAGCTATTTGATT	Fungi	Basidiomycota	Agaricomycetes	Thelephorales	Thelephoraceae	Tomentella	tomentella-thelephora	UDB018459	98	3e-99	97.2
OTU494	207_4259971|F|ITS2;size=7;	LT978802	ACACCTCAACTCTCATGGTTTGCCATGATGAGCTTGGACTTTGGAGGTCTTGCTGGCCTACGGTCGGCTCCTCTTGAATGAATCAGCTTGCCAGTGTTTGGTGGCGTCACAGGTGTGATAACTATCTACGCTTGTGATTTTCTGCCAGGTAACCTTCAGCAGTGGAGGTTCACTGGAGCTCATAGACGTCTCTCCTCAGTGAGGACAGCCCTTTGAAT	Fungi	Basidiomycota	Agaricomycetes	Thelephorales	Thelephoraceae	Tomentella	tomentella-thelephora	UDB016491	100	2e-90	94.09
OTU495	208_4279533|F|ITS2;size=48;	LT978606	AATACCCCCTCACATCTAATGTGGTATTGGCTGAAGTGATGGGAATTGTACCCAAGAGTCACTATGCTGAAATCTATTGCGTGGATAACTGATTCCGGTAATTGACTTTGTAAGCGTTATTGAGAACGGAAACCAGTCGAGTATCGGTATAAGTTGCGCACATCTGGACCCCCATCCAGCGTAAAGCTCTG	Fungi	Ascomycota	Pezizomycetes	Pezizales	Tuberaceae	Tuber	tuber-helvella	KJ162154	100	3e-93	98.95
OTU496	208_4279612|F|ITS2;size=653;	LT980489	GGAAGAAGACTCACGCGGCGCAAAGCGTGGTGGTGGCGGCGGCGGCGGTCCCGAGAGGGCAGCCACCCCGGCGGAATTGATGGGCGGACGACTGCCGCGTCCCTGAGCGTGATATTCTTGCTATCGCCTCGAGCGCGGCGAGGCACCCAGCCCCGGCCAGTCGCCTCCCGCATCGGAGAGTGTGATATTTTGCTATCGCCTCCCGAGCGGCTAGGCTGCCAGCCCTGCCACCCGGGCAGGGCAGGGAGACCCGTGTCATT	Fungi	Ascomycota	Pezizomycetes	Pezizales	Helvellaceae	Helvella	tuber-helvella	UDB019758	100	7e-121	96.92
OTU497	208_4280850|F|ITS2;size=79;	LT981248	CATGTTCTCTCAACCTCTGATGAGGCTTGGATGGTGGAGGTTTTTGCAGGCCAGCTTTGTTTGGTCTGCTCCTCTGAAAAGCATTAGCGGTCGTCGTCTCGTACTGCAGGTGTGATAAATTATCTATGCCTATGGTTTTGAGTGGTGGGGCTGCTTCTTAACACACCCAACTTTATTGAAAA	Fungi	Basidiomycota	Agaricomycetes	Agaricales	_	_	inocybe	AM882936	75	9e-29	84.51
OTU498	208_4288741|F|ITS2;size=4;	LT979517	GTACTCTCACACTCTCTGATTTCAGATCGGGGAGAGGTGGACTTGGGTGTTGCTGCTTACCTGTGGCTCATCTCAAATGCAGTAGTGCACCTCTTGGTTGGACATAGTACGGCGTGATAAGTGTCTTCGCCGGCACCTCGGAGGAGGGTGACTGATTGAGAGCTCTGTGCTTCAAACTGTCTTCGGACAATCTCTGACA	Fungi	Basidiomycota	Agaricomycetes	Sebacinales	Sebacinaceae	Sebacina	sebacina	UDB016332	100	2e-70	90.64
OTU499	209_4321211|F|ITS2;size=2593;	LT979518	GTAACCTCACACTTCCGGTCTTCGGATTGGGAGCGGTGGACTTGGGTGTTGCTGCTTCACCGCGGCTCGCCTTAAATGCATTAGTGCACCTCCAGATTGGACATAGTACAGCGTGATAAGTATCTTCGCTGGCACCTTACTCAAGGGTGGCTGATCCAGAGCTCTGTGCTCCAAACCGTCTTCGGACAATGACTGACA	Fungi	Basidiomycota	Agaricomycetes	Sebacinales	Sebacinaceae	Sebacina	sebacina	AB831806	100	1e-86	95.98
OTU500	209_4323733|F|ITS2;size=8045;	LT979848	AATCTTCAAAACCCTTTTTCTTTGGTCCATTTTTTGGTCGGGAAAAGGATTTTTGGACTTGGAGGTTCAATGCTTGCCTCGAAAGCGAGCTCCTCTCAAATGAATTAGTGGGGTCCGCTTTGCTGATCCTTGACGTGATAAGATGTTTCTACGTTTTGGGTTTAGCACTGTCCCTTGGATGCCTGCTCCTAACTGTCTCATGGACAATGATGGTGCTCTGGTCACCGCTGTCTACATTGGCGGGAGGCTGGACCCACAAAAAGAAAA	Fungi	Basidiomycota	Agaricomycetes	Russulales	Russulaceae	Russula	russula-lactarius	dbj|AB972834.1	100	7.57e-123	97.03
OTU501	21_461022|F|ITS2;size=3662;	LT979519	GTACTCTCACACTCTCTGATCCTTTGGATGTGGGGAGCGGTGGACTTGGGTGGTTGCTGCATTCCTTGTGGCTCACCTCAAAAGTGTCAGTGCACCTCTTGGTTGGACATAGTACGGCGTGATAAGTATCTTCGCCGGCACCTCTTAAATGCGAGAGGGTGGCCAGCCAGGAGCTCTGTGCTTTCAAACCGTCTTCGGACATTCTTTGACA	Fungi	Basidiomycota	Agaricomycetes	Sebacinales	Sebacinaceae	Sebacina	sebacina	gb|GQ268664.1	100	1.03e-71	91
OTU502	21_461057|F|ITS2;size=632;	LT979520	GTACTCTCACACTCCCGATCTTTGGATTGGGAGCGGTGGACTTGGGTGTTGCTGCTTTACTGTGGCTCACCTCAAATGGATTCGTGCAACTCTTGGTTGGACATAGTACGGCGTGATAAGTGTCTTCGCCGGCACCTCACTAGAGGGTGGCTGATCAGGAGCTCTGTGCTTCAAACCGTCTTCGGACAATGACTGACA	Fungi	Basidiomycota	Agaricomycetes	Sebacinales	Sebacinaceae	Sebacina	sebacina	emb|HG796953.1	100	7.82e-88	96.99
OTU503	21_461474|F|ITS2;size=140;	LT980360	CAAGTTCTCAACCACATCGGGTTTCGATGTGGCTTGGATGGTGGGGGTTCTTTTTTGCAGGCTTTTGTAGTCGGCTCCCCTGAAATGTATTAGTGGTATCTGAGCTACTACAGGTGTGGTAATTATCTATGCCTTGGTATGCTGCATAAAACAGATTGCACCGCTTCTAACACAATTTTTGATGA	Fungi	Basidiomycota	Agaricomycetes	Agaricales	Inocybaceae	Inocybe	inocybe	JX129146	93	1e-57	90
OTU504	21_463987|F|ITS2;size=3819;	LT980998	CCCAACAACTCAAGCATGTATTTAATAATGCTTGGATATCTTTGGAGAGGTATCACTTTTTATTAAGAGAAGCCCTCCAGAAATTCATAGGTAGTATGGTTTGTACTGAACCAGACGTAATAATAATAAAATCGTTTGTTGTAGTATAATCATTGTACTTTTGCCTTAAAAACACCCATTGATTTTC	Fungi	Ascomycota	Pezizomycetes	Pezizales	Pezizaceae	_	terfezia-peziza	emb|LN912345.1	97.33	1.2e-70	94.02
OTU505	21_490586|F|ITS2;size=2044;	LT980565	ATATATATCAACCTTGTGTTGGATGTGGGGGTTTTGTTGGCCTTTGAGAGGTCAGCTCCCCTGAAATGCATTAGCGGAACTAACTTACCGTTCATTGGTGTGATAAAACTATCTACGCTATTGACGTGAAAGTCAGGGTTCAGCTTCTAACAAGTCTTCATTTA	Fungi	Basidiomycota	Agaricomycetes	Agaricales	Cortinariaceae	Cortinarius	cortinarius	gb|EF218760.1	100	2.98e-57	92.77
OTU506	21_493412|F|ITS2;size=15324;	LT978607	GAAAACCCCATCACAGTTCCTGTGGTCTTGGTATGAGTGGGTTGATAGTATGTGGAGACATGCTTATAACACTCTACTGAAATTTATAGACAGGATACCAGATAATGGGCAATAGACTTTGTAAATGTCCACAGGATATATATCAGTCATGTGTCATGTTTGGTCCTGATATTATGGACTCCTGTTCTATATAAACATTG	Fungi	Ascomycota	Pezizomycetes	Pezizales	Tuberaceae	Tuber	tuber-helvella	JX458716	100	1e-92	97.5
OTU507	21_494093|F|ITS2;size=353;	LT980882	AATTCTGTCAAAACATGCACTTGAGTGTGTTTTGGATTGTGGGAGTGTCTGCTGGCTTTATATGAGTCAGCTCTCCTGAAAGACATTAGCTTTGGAGGGATGTGCCAAGTCACTTCTGCCTTTCCATTGGTGTGATAGATGAATAAACTTATCTACGCCAGGAAAGCAGGTTGCAGGTGATGCACTGTGATCTCTCTGCTCTCTAATTGACATTTGTCTGATA	Fungi	Basidiomycota	Agaricomycetes	Agaricales	Amanitaceae	Amanita	amanita	KF650998	100	3e-114	100
OTU508	211_4360080|F|ITS2;size=195;	LT980490	AAAAGTAGACTCACGCGTGGAGAACGCGTGGTGGTGGCGGAGGCGGCGGCCCCGACAGGGGGGCCACCCCGCCGGAATCGATGGGCGGACGCCTGTCGCGATGCCGAGCGTGATATGACCATCTGCGCTCGAGCGCGGCGAGGCTCCCAGCCCCGGGCCCGAGATCTTGGGCGGGGGGAGAGCAAGACATT	Fungi	Ascomycota	Pezizomycetes	Pezizales	Helvellaceae	Helvella	tuber-helvella	UDB019802	95	5e-76	95.14
OTU509	211_4360961|F|ITS2;size=30;	LT980491	ACACCACTCAAGCTCAGCTTGGTATTGGGTCACGCCAGCAATGGTGAACCTCAAACTCAGTGGCGGCACCGTTGGGTCCCGAGCGTAGTAAATATCTCGCTGAGGGTTCCCTCCGGTTGGCGACCAACAACCCAATTTTCTAA	Fungi	Ascomycota	Pezizomycetes	Pezizales	Helvellaceae	Helvella	tuber-helvella	AJ544211	100	2e-68	99.3
OTU510	211_4364004|F|ITS2;size=5;	LT980987	AACCCTTTCAACTCCTACTTGATTTACTTTTCAAGGGACTTGGTTATGGTGGAAGAGGAGAGTCCAACATCTGTAAGGATTCCTCCTCCCCATCAAAATTCTATGGCGGGTCCGTACCCATCCTCTGTTGAAGTGAGGCGTTGTAAAAGCTGTCAAGCACTTTTCGCCAACCAGCAGTTGGGAACGTTTGGGCTCATTGCCGTTATCGAAAACCCCCCTCAAAA	Fungi	Ascomycota	Pezizomycetes	Pezizales	Pyronemataceae	_	genea-humaria	JX989970	100	8e-90	93.39
OTU511	211_4383624|F|ITS2;size=26;	LT978803	ACACCTCAACTCTTTATGGTTTTCCATGATGAGCTTGGACTTTGGGGGTTTTGCTGGCCTATGGTTGGCTCCTCTAAAATAAATCAGCTTACCAGTGTTTGGTGGGTATCATGGGTGTGATAACTATCTACGCTTGCGGTTCCTCCACCAGGTAACCTTCAGCAATGGAGGTTCGCTGGAGCTCACAAACGTCTCTCCTCAGCGAAGACAGCTTTCTGAAC	Fungi	Basidiomycota	Agaricomycetes	Thelephorales	Thelephoraceae	Tomentella	tomentella-thelephora	JF506816	96	2e-86	93.87
OTU512	214_4431003|F|ITS2;size=46;	LT979849	AATCCTCAAAACCCCCCTTTCTTTCATCGGAACGGGGGATTTTGGACTTGGAGGCTCAATGCTTGCTTTCGCTTTCGAAAGCGAGCTCCTCTTAAATGAATCAGTGGGGTCCGCTTTGCCGATCCTTGACGTGATAAGATGTTTCTACGTTTTGGATTTGGCACCGCCTTTCGGAAGCCCGCTCCTAATCGTCCGCATGGACAAACGATGGTGCTCCGGTCCGTCGCCAAATCTACGTTGGCGGGGGGCTTGACCCACGACCAAAA	Fungi	Basidiomycota	Agaricomycetes	Russulales	Russulaceae	Russula	russula-lactarius	gb|KU141301.1	95.11	1.44e-99	93.28
OTU513	214_4432091|F|ITS2;size=21;	LT981142	AATTCTCAACCATGTCTTTTGTCGACATGGCTTGGACTTGGGGGTTGCTGGCAGCGAAAGCGGTCGGCTCTCCTGAAATGCATTAGCGACGGACTGCAAGTCTGACGTGCACGGCCTAGACGTGATAATGATCGTCGCCGCTGGAGCGTCCGGACGAGCGACACACGAAGTCTGTTTGCTTCCAATTCCCCTTTGACTTGGGACTTTCGAGCCAAGCCTAGCTACTAGTCACCGACGAACGCAGGCCGGTTCGGCGTCGAGTGTCATGGTCTGATTCTCGATT	Fungi	Basidiomycota	Agaricomycetes	Boletales	Boletaceae	_	boletus	EF173307	80	1e-58	85.04
OTU514	214_4442484|F|ITS2;size=9;	LT981143	GAATTCTCAACCATGTCTCATGACGAGGCTTGGCTTGGACTTGGGGGCTGCTGGCGGCCAAGGTCGTCGACTCCCCTGAAAAGTATTAGCAAAGGGCAGCAAGCCTGTGATGTGGCACGGCCTTTTCGACGTGATAGTGATCGTCGCCGCTGGAGCGTCCGGACGAGCGACACACGAAGTCTGTTTGCTTCCAATTCCCCTTTGACTTGGGACTTTCGAGCCAAGCCTAGCTACTAGTCACCGACGAACGCAGGCAAGGCTTTTTCGTCCCTCGTCTTCATCGACG	Fungi	Basidiomycota	Agaricomycetes	Boletales	Boletaceae	_	boletus	KJ609174	57	3e-50	88.69
OTU515	214_4444302|F|ITS2;size=1627;	LT981156	AATTCTCAACTCCGAGTAAGAGACTTGTCTGTCTATCTGGGAGCTTGGACTTGGAGTGTGCTGGCCTGGCTTGTCATAGGTTGGCTCCTCTCAAAAGCATTAGCAAGATGTGTTTAGGGATTTTTGCAGACTTCAGTGTGATAGGTGTGTTGCGCTGTTGTCTGGCAAGTGGAAGGGGGAGCATCTGCTTACAATTTGTCTTTTGAAAGACCCTTTTGAA	Fungi	Basidiomycota	Agaricomycetes	Atheliales	Atheliaceae	_	atheliales1	emb|LN912354.1	100	5.49e-79	91.59
OTU516	215_4452493|F|ITS2;size=206;	LT980492	AGAAGAAGACTCACGCTTGGTAATGCGTGGTGGTGGCGGCGGTGGCGGCCCCGACAGGGAGGCCACCCCGGCGGAATACATGGGCGGACGACCGCCGCGTCGCAGAGCGTGATATTTCGCTATCGCCTCGAGCGCGGAGAGGGTGCCAGCCCTGGCCAGATGCCTGCCAGCAGCGTGGCGCGGCGCGACACTGTGCTGTCGCCTCGAGCGCGGGTAGGCGACCAATCCCTCGCCCACGGGCTGGGCTTGGGAGACTGGGAGAACATGACACC	Fungi	Ascomycota	Pezizomycetes	Pezizales	Helvellaceae	Helvella	tuber-helvella	KC122813	100	2e-141	100
OTU517	216_4484869|F|ITS2;size=47;	LT979521	GTACTCTCACACTTCCGATCGTTTGGATTGGGAGCGGTGGATTTGGGTGTTGCCGCTTTACTGAGGCTCACCTTGAATGCATTAGTGCAACTCTTGGTTGGACATAGTACGGCGTGATAAGTCTTCGCCGGCACCTCACCAGAGGGTGGCTGATCAGGAGCTCTGTGCTTTCAAACCGTCTTCGGACAATCCCTGACA	Fungi	Basidiomycota	Agaricomycetes	Sebacinales	Sebacinaceae	Sebacina	sebacina	gb|JX630925.1	100	6.08e-84	95.96
OTU518	217_4523586|F|ITS2;size=11266;	LT978804	ACACCTCAACTCTCATGGCTTGCCATGATGAGCTTGGACTTTGGGGGTCTTGCTGGCCTGTGTGGTCGGCTCCTCTCAAATGAATCAGCTTGCCAGTGTTTGGTGGCATCACAAGTGTGATAACTATCTACGCTTGCGGTTTCCCACCAGGTAACCTTCAGTGATGGAGGTTCGCTGGGGCTCATAAACGTCTTTCCTCAGTGAAGACAGCTCTCTGAAC	Fungi	Basidiomycota	Agaricomycetes	Thelephorales	Thelephoraceae	Tomentella	tomentella-thelephora	gb|KR149773.1	100	4.62e-110	100
OTU519	218_4535906|F|ITS2;size=11;	LT979522	TACTCTCACACTCTCCGATCCTTTGGATTTGGGGAGTGGTGGACTTGGGTGCTTGCTGCTTTTGTTGTGGCTCACCTTAAATGTGTCAGTGCATCTCTTGATTGGACATAGTACGGCGTGATAAGTGTCTTCGCCGGCACCTCATAAGAGGGTGGCTGATCAGGAGCTCTGTGCTCCAAACCGTCCTTGGACAATGACTGACA	Fungi	Basidiomycota	Agaricomycetes	Sebacinales	Sebacinaceae	Sebacina	sebacina	dbj|AB848606.1	100	2.85e-77	93.14
OTU520	219_4585256|F|ITS2;size=6;	LT980509	ACAACCATCTCGAATCCGCCTTTTCTTTATGAGGTGGGGGAAATCGGTGTTGGTGGCGGAGGAACGAGTTTGTTGGGCTTGCCCACTATATGTTTGGCAAATCTCTCCTCCCCACTGAAATTTGGCGGTGGGATATTTGGGTTTGGTGGGATTTTGAGGGGATATGATGACTGATAATCTTCTTCCCCCTCACTTTCTTAGCCCAGTCACAGTCCCCCAATATATATATAATGTCAAA	Fungi	Ascomycota	Pezizomycetes	Pezizales	Pyronemataceae	Genea	genea-humaria	gb|KJ938884.1	96.64	2.16e-103	96.96
OTU521	22_502552|F|ITS2;size=41227;	LT978565	AATTCTCAACCATTCTCTTTAAGAGAGAGACATGGCTTGGAGTTGGGAGTTGCTGGCAGGGAACTGTCAGCTCTCCTTAAATATATTAGCGATCAAGTTGACTAGTCTTTGACATGCATGGCCTCTGACGTGATAATGATCGTCATGGCTGGAGTGTCTTTCCTGGACTATGTACACAGAGATAGCTTCTAATTTACATTTGGAAAAGAAAGGGAAGAGTTTAGCTACTAGGCAGTCTAACTATTTAGGCTGGCGAACACAAGCTCGATCTTTCTTTCTCCATCTTCATTG	Fungi	Basidiomycota	Agaricomycetes	Boletales	Boletaceae	Xerocomus	boletus	gb|JQ991918.1	100	7.18e-148	99.66
OTU522	22_530544|F|ITS2;size=1118;	LT979433	ACACCTCAACTCTCCACGGTTTGCCCGTGGTGAGCTTGGACTTTGGAGGTTTGCTGGCCCCACAGGTCGGCTCCTCTCAAATGGATCAGCTTGCCAGCGTTTGGTGGTGTCGCAGGTGTGATAAATATCTACGCTTGTGGCCGTCCGCCATGTAACCTTCAGCGATGGAGGTTCGCCGGAGCTCAAAAACGTCTCTCCTCAGCGAAGACAGCTTTTTAAC	Fungi	Basidiomycota	Agaricomycetes	Thelephorales	Thelephoraceae	Thelephora	tomentella-thelephora	emb|LN911066.1	100	1e-106	99.09
OTU523	22_533469|F|ITS2;size=21551;	LT980762	AAATTCTCAAAGTAAATATTTTGTTAATTCATTTGGTTTACTTTGGATTTTGGAGGCTTTGCAGATTTTACAATCTGCTCCTCTTGAATATATTAGCTGGATCTCAGTATATACTTGGTTCCACTTGGCGTGATAAGTATCACTCGCTGAGGACCCCACCCATAAAAAGGTGGCCAAGGAATACAGATGAACTGCTTCTAATAGTCTATTAAATTAGACAATTAATTTCAAG	Fungi	Basidiomycota	Agaricomycetes	Cantharellales	Ceratobasidiaceae	Ceratobasidium	ceratobasidium1	AB972825	100	3e-119	100
OTU524	22_537233|F|ITS2;size=10807;	LT978583	AATTCTCAACCACGTCTTGCTTGATTGAAAGACCATGGCTTGGAGTTGGGGGGTCTGCTGGCCCATGGGTCAGCTCTCCTGAAATGCATTAGCAAAATGGCAGACATGCACGGCCTTCCGACGTGATAATGATCGTCGTGGCTGGAGTGTCAGATCGCCCATGTTGCTTCTAATCAAAGAGATGGGGCGGCAGCCTTGTCCTTCTTGACA	Fungi	Basidiomycota	Agaricomycetes	Boletales	Boletaceae	Xanthoconium	boletus	AB509750	68	2e-60	95.89
OTU525	220_4599856|F|ITS2;size=4;	LT980500	AATTCTCAACCTTCATCGGCTTTTGCTGATGATGGCTTGGATATGGGGGGTTTATTTTGCTGGCTTCTTTACAGATGGTCAGCTCCCCTTAAATGCATTAGCCGGTGCCCCGCGTGGACTGTCTATTGGTGTGATAATTATCTACGCTATAGACATCTGCAATAATAGGGTTTGCGCTGCTTCTAACAGTCTGTTGATTCAGACAATACATGACA	Fungi	Basidiomycota	Agaricomycetes	Agaricales	Cortinariaceae	Hebeloma	hebeloma-alnicola	HF678202	100	3e-88	93.98
OTU526	220_4606827|F|ITS2;size=6;	LT980501	AATTCTCAACCATTGTCAACTTTTGCTGATAATGGCTTGGATGTGGGGGTCTATTTTGCTGGCTTCTCAGATAGTCAGCTCCCCTTAAATGCATTAGCTGGTGCCCCGCGTGGACTGTCTATTGGTGTGATAATTATCTACGCTATAGACATCTGCAATCATATGGGTTTGCACTGCTTCTAATCGTCTGTTCAATCAGACAATACATGACAA	Fungi	Basidiomycota	Agaricomycetes	Agaricales	Cortinariaceae	Hebeloma	hebeloma-alnicola	KM390747	100	9e-99	97.18
OTU527	221_4608857|F|ITS2;size=48;	LT978805	ACACCTCAACTCTCATGGCCTTGCCATGACGAGCTTGGACTTTGGGGGTCTTGCTGGCCTATGGTCAGCTCCTCTCAAATGAATTAGCTTCCCAGTGTTTGGTTGGCATCGCAGGTGTGATAACTATCTACGCTTGTTGTTTCCACCAGGTAACCTTCAGTAACATGGGGGTTCGCTGGAGCTCATAAATGTCTCTCCTCAGTGGGGACAGCTCTTTGAAC	Fungi	Basidiomycota	Agaricomycetes	Thelephorales	Thelephoraceae	Tomentella	tomentella-thelephora	gb|JX625336.1	100	4.68e-100	97.29
OTU528	221_4626865|F|ITS2;size=58;	LT979523	TAATCTCACACTTCTGATCCTTTGGATCGGGAGCGGTGGACTTGGGTGTTGCTGCTTGACGGTGGCTCACCTCAAATGCATTAGTGCAACTCCAGGTTGGACATAGTACGGCGTGATAAGTATCTTCGCCGGCACCTCACCAGAGGGTGGCTAATCCGGAGCTCTGTGCTTCAAACCGTCTTCGGACAATGACTGACA	Fungi	Basidiomycota	Agaricomycetes	Sebacinales	Sebacinaceae	Sebacina	sebacina	gb|EU668225.1	86.36	4.74e-80	98.83
OTU529	222_4649866|F|ITS2;size=58;	LT980124	AATTCTCAACTACCTTTTTAACATTTTATGTGTGAAGGGTGAAGTTGGAGTTGGAGGATCATAGCTGGCGCAACTGTCTCTAAGGTTGCTTGTTCGCTCCTCTTGAATGGATGAGCTTTTCTAATGGATCATAGCTCAGTAACACTAATGTGATAATTATCTACGTTAGATGTGAAAGCTTATGAGTAGAGCAGACTTTGAAAGCTCCTATAGAAAAGAATATCAAGGGATAACAAACCCTTGACTTTGACAA	Fungi	Basidiomycota	Agaricomycetes	Thelephorales	Thelephoraceae	Pseudotomentella	pseudotomentella	EU563488	100	4e-108	94.27
OTU530	223_4680033|F|ITS2;size=24395;	LT980480	ACAACCAGTTCAATCCCCTTTTAGAAATATTTCGCGGATTGGTTATTGGTGAATGAGGGGATCCGTGCATAACGTTGAATCACCTCACCACCGAAATTCAGAGGCGGTTTGTCCCCACGTGTCTGTGGCGTTGTAAAAGCTTTACCAGCACTATTCGCTCGCATCGTGGGTCCACTGCTTGCCATTGGAGAAATCCCCATTCATCAAA	Fungi	Ascomycota	Pezizomycetes	Pezizales	Pyronemataceae	Humaria	genea-humaria	EU024875	100	2e-104	99.52
OTU531	224_4689035|F|ITS2;size=140;	LT978806	ACACCTCAACTCTCATGGCTTGCCATGATGAGCTTGGACTTTGGGGGTCTTGTTGGCCTGTGAGCCAGCTCCTCTTAAATGAATTAGCTTGCCGGTGTTTGGTGGCATCATGGGTGTGATAATTATCTACGCTTGTGGTTTCCCACCAGATGACCTTCAGCAATGGAGGTTCGCTGGGGCTTATAAATGTCTCTCCTTAGTGAGGACAGCCCTTTGAAT	Fungi	Basidiomycota	Agaricomycetes	Thelephorales	Thelephoraceae	Tomentella	tomentella-thelephora	dbj|LC035344.1	94.98	4.67e-90	96.15
OTU532	224_4691517|F|ITS2;size=7;	LT978807	ACACCTCAACTCTCATGGCTTGCCATGATGAGCTTGGACTTTGGGGGTCTTGTTGGCCTGTGAGCCAGCTCCTCTTAAATGAATTAGCTTGCCGGTGTTTGGTGGCATCATGGGTGTGATAATTATCTACGCTTGTGGTTTCCCACCAGATGACCTTCGACAGCGGAGGTTCACTGGAGCTCATAGATGTCTCTCCTTAGCGAGGACAGCCCTTTGAAT	Fungi	Basidiomycota	Agaricomycetes	Thelephorales	Thelephoraceae	Tomentella	tomentella-thelephora	JX630406	95	8e-85	93.78
OTU533	224_4709075|F|ITS2;size=26;	LT979434	ACACCTCAACTCTCCACGGTTTGCCCGTGGTGAGCTTGGACTTTGGAGGTTTGCTGGCCCCAACAGGGTCGGCTCCTCTCAAATGGATCAGCTTGCCAGCGTTTGGTGGCGTCGCAGGTGTGATAAATATCTACGCTTGTGGCCGTCCGCCATGTAACCTTCAGCGATGGAGGTTCGCCGGAGCTCAAAAACGTCTCTCCTCAGCGAAGACAGCTTTGAAC	Fungi	Basidiomycota	Agaricomycetes	Thelephorales	Thelephoraceae	Thelephora	tomentella-thelephora	emb|LN911066.1	98.19	7.78e-103	98.62
OTU534	225_4722308|F|ITS2;size=7;	LT978808	ACACCTCAACTCTCATGGTCTGCCATGATGAGCTTGGACTTTGGGGGTCTTGCCGGCCTAGCGTCGGCTCCTCTCAAATGGATCAGCTTTCCAGTGTTTGGTGGCGTCACGGGTGTGATAATTATCTACGCTTGTGGTTTTCCACCATGCAACCTTCAGCAATGGAGGTTCGCTGGAGCTCACAGACGTCCTCTTCCCATAGAGGACAGCTTTTGAAC	Fungi	Basidiomycota	Agaricomycetes	Thelephorales	Thelephoraceae	Tomentella	tomentella-thelephora	gb|KP827806.1	100	2.34e-88	94.5
OTU535	226_4749123|F|ITS2;size=1972;	LT980810	AATTCTCAACTTCACCGATTAGATTCGAGTGGAAGCTTGGAGTTTGGAGCGTGCTGGCCCTCCCCGGGGTCGGCTCCTCTTTAAATGCAGCAGCGGAGTCATCTTTGACCTTGCGGCATTGGCGTGATAGTTGTTGTTGCGCCGTTGGCCCAAGGTCTCGGTCCGCTTACAAAATGGTCTGGGGATGACTTGGACAATGAAATGTTT	Fungi	Basidiomycota	Agaricomycetes	Atheliales	Atheliaceae	Byssocorticium	byssocorticium	UDB016321	100	2e-100	98.55
OTU536	226_4749917|F|ITS2;size=94;	LT980999	AGAAACCATCAGGCAGGGCTTTCATGCCACGCCTGGATTTTGTCAGAGAGGCAGGTGACCTGAGGTCCCTCTGCCCTTTGTAAAACCATGGATATTTTGAAGACTGGCTTCGTTCCAACGTGATAGAATATTTCATTCGCTGGTACCGTCATCTTCAGATCTTTCCAAAAACAAAACCCACAAAATTATTAAAT	Fungi	Ascomycota	Pezizomycetes	Pezizales	Pezizaceae	_	marcelleina-peziza	AB506102	99	4e-87	96.88
OTU537	226_4758548|F|ITS2;size=4;	LT979850	ACATCCTTCAACCTTTCTTAGTTTCTTGACTAAAGGAAGGCTTGGACTTTGGGGGTTTTTCATTGCTGGCCTCCTTTGAAGCCAGCTCCTCCTAAATGTATTAGTAGGGTCTGCTTTGCTGATCCTTGACGTGATAAGATGTTTCTACGTCTTGGGTTTTGCACTGTCGCTTTGGACTCTGCTTCTAACCGTCTTGTGCATTCAGGACAGAGTCATGAA	Fungi	Basidiomycota	Agaricomycetes	Russulales	Russulaceae	Russula	russula-lactarius	UDB014171	90	1e-93	97.98
OTU538	227_4777492|F|ITS2;size=69;	LT980199	AATTCTCAACCACCCTTTGATTGATATCGAGGGGTGGCTTGGATTTTGGGAGTTGCCGGCTTGACCCCTTTGGGGGGACGGGTCGGCTCTCCTTAAAAGCATTAGCGAAAGGCGGCAAGCCCCCTGCATGCACGGCCTTCGACGTGATAATGATCGTCGTGGCTGGAGTGCGAGGCATATATATCGACCTTTGCTTCTAAACATATCGTACTGGGGACTTTGCTTCGGCGGACGAACTTTTACTTTCTGACG	Fungi	Basidiomycota	Agaricomycetes	Boletales	Melanogastraceae	Melanogaster	paxillus-gyrodon	AJ555516	100	7e-91	91.02
OTU539	227_4777572|F|ITS2;size=28;	LT978809	ACACCTCAACTCCCGTGGTTCGCCAGGGTGAGCTTGGACTCTCTGGGGGTTTTGCTGGCTTTACAGCCGGCTCCTCTCAAATGGATCAGCTTGCCAGTGTTTTGGTGGGATCCCAGGTGTGATAACTATCTACGCTTGTGGCTTCCTGTCGAGCAACCTTCAGCGATGAGGGTTCGCTGGGGCTCATAAACGTCTCTCTTGTGGAGACAGGTTTTTGAA	Fungi	Basidiomycota	Agaricomycetes	Thelephorales	Thelephoraceae	Tomentella	tomentella-thelephora	gb|EF644151.1	100	5.13e-75	90.87
OTU540	229_4809617|F|ITS2;size=143;	LT980243	AAATCTCAACCTCCTTGGTTTCTTTTGGATGCCAAAGGAGGCTTGGACTTTGGAGGGCTTTGCTGGACTTGAAAGGCCAGCTCCTCTCAAATGAATTAGCGAGGTTCCCTTTGCCGATCCTCGACGTGTGATAAGATGCTTCCACGTCTCGGTCTTTGGCTCTGTCGCCTCTTGGGACCTGCTTCCAATCGTCTCTCGATGAGACAATGTTCGAGCTTGCCTCGAACCATGTAC	Fungi	Basidiomycota	Agaricomycetes	Russulales	Russulaceae	Lactarius	russula-lactarius	UDB019729	100	4e-113	98.29
OTU541	229_4810044|F|ITS2;size=4;	LT980361	ATATCTCAACCATGCACGGAAGTGTTATGGCTTGGACTTGGGGGACGATGCAGGCTCCGACTCGGTTGGTCTGCTCCCCTGAAATACATGAGCGAAATAAAAAGGCCTCTTTGTTGGGTGTGATAGCTTTATCTGCATCCGAGGGGTCGTTTGTGTTCGCTGCTTTGGATCTCATTTTG	Fungi	Basidiomycota	Agaricomycetes	Agaricales	Inocybaceae	Inocybe	inocybe	gb|KJ769274.1	100	1.47e-55	89.5
OTU542	229_4818177|F|ITS2;size=9;	LT978810	AAACCTCAACTCCTCATGGCTTGCCATGATGAGCTTGGACTTGGGGGTCTTGCTGGCCTGCAGTCAGCTCCTCTCAAATAAATCAGCTTGCCAGTGTTTGGTGGCACCACAGGTGTGATAAACATCTATGCTTGTGGTTGTCTGCCATGGAACCTTCAGCGATGGAGGTTTGCTGGAGCTTACAAAAGTCTCTCCTCAGTGAGGACAGCGATTTGAAC	Fungi	Basidiomycota	Agaricomycetes	Thelephorales	Thelephoraceae	Tomentella	tomentella-thelephora	emb|FR852174.1	94.5	6.13e-79	93.2
OTU543	229_4825350|F|ITS2;size=14;	LT979524	TACTCTCACACTCTCTGATCCTTTGGATTGGGAGTGGTGGACTTGGGTGTTGCTGTTACTGTTACTGCGCGGCTCACCTCAAATGCATTAGTGCAACTCCTGGTTGGACATAGTACGGCGTGATAAGTGTCTTCGCCGGCACCTCGGAAGAGGGTGACTGATCTTGAGCTCTGTGCTTCAAACTGTCCTCGGACAATGTCTGACA	Fungi	Basidiomycota	Agaricomycetes	Sebacinales	Sebacinaceae	Sebacina	sebacina	dbj|AB848617.1	100	6.22e-69	90.82
OTU544	23_559690|F|ITS2;size=9695;	LT978811	ACATCCTCAACTCCTCACGGCTTGCTGTGACGAGCTTGGACTTTGGAGGTCTTTGCTGGCTTTTGCAGGTCAGCTCCTCTTAAATGGATCAGCTTACCAGTGTTCGGTGGCATCACAGGTGTGATAACTATATCTACGCTTGTGGCTTTCCACTGGGTAACCTTCATCACTGAAGGTTCGCTGGGGGCTCATAAATGTCTCTCCTCAGTGAAGACAGCTCTTTGAAC	Fungi	Basidiomycota	Agaricomycetes	Thelephorales	Thelephoraceae	Tomentella	tomentella-thelephora	dbj|AB848668.1	96.92	4.79e-85	93.27
OTU545	23_561457|F|ITS2;size=43332;	LT980244	AAATCTCAACCTCCTTGGTTTCTTCTGGAGATCAAAGGAGGCTTGGACTTTGGAGGCCTTTGCTGGCATCTCTCTCCTTTGAAAGGTGGCCAGCTCCTCTTGAATGAATTAGCGGGGTCCTCTTTGCCGATCCTTGACATGTGATAAGATGTTTCCGTGTCTCGGTTTCTGGCTCTGTTGCTTTTGGGACCCGCTTCCAACCGTCTCAACATCGAGACAATGTTCGAGCCTGTTGCCCTTCTCGGGAAACGCTCTCGACCCCCACGAAC	Fungi	Basidiomycota	Agaricomycetes	Russulales	Russulaceae	Lactarius	russula-lactarius	KF433015	100	4e-138	99.63
OTU546	23_561844|F|ITS2;size=570;	LT981108	AATTATCAAGCTAGATGGCTTTTGTTATCTTCGCTTGGTGTTTGGGCTTTGCCGTGTCCATCTACTGGAACGGCTGGTCTTAAAAGTATTAGCTGACTCTCAATGTGGGTGCTGGTTCTACTCAGCGTGATAATATCTTGACCGCTGAGGACATCTTTTGGGATGGCCAGTCCTCGTTGGGGTTGCTTTCTAATCTGGAGTCGCGGGACCTTCTCATTATGAGGTTCCTGTGTGCTGCTTTCAA	Fungi	Basidiomycota	Agaricomycetes	Cantharellales	Clavulinaceae	_	clavulina	gb|KF954065.1	82.38	1.27e-46	84.62
OTU547	23_561875|F|ITS2;size=2194;	LT979851	AATTCTCAAACCCCCACTTGGTTTCTTGACCAAAGACGGGTTTGGATTTTGGAGGGTTTTTGCCGACTTGAAGAAAAGTCAGCTCCTCTTAAATGCATTAGTGGGGTCCTCTTTGCAGATCCTCGGACGTGATAAGACATTTCTACGTCTTGGGATTTGTACTGTTCTTTAGGAACCTGCTTACAACCGTCTCCCATGAGACATCGTTCGAGCTTGCTCGACCCACGAA	Fungi	Basidiomycota	Agaricomycetes	Russulales	Russulaceae	Russula	russula-lactarius	UDB013323	100	2e-91	93.45
OTU548	23_562132|F|ITS2;size=26843;	LT981109	AATTCTCAAGCTGGATACTTTTTCCTTCGGGAAAGGTCATCTTTCAAGGCTTGGTCTTGGGTTTTGCCGTGCCCTTTATTGGAACGGCTGACCCTAAAAATATTAGCTGACCTTCATGTGGCATTGGTTCCACTCAGCGTGATAATGATTATGACCGCTGAGGACATCTTTCGAGATGGCCAGTTCCCATTTGGGCCGCTTCTAATCCTTTCACTCTCAA	Fungi	Basidiomycota	Agaricomycetes	Cantharellales	Clavulinaceae	_	clavulina	AY310836	72	1e-43	86.88
OTU549	23_562151|F|ITS2;size=16732;	LT980245	AAACCTCAACCTCCTTGGTTTCTTCTGGAGACCAAAGCAGGCTTGGACTTTGGAGGGCTTTGCTGGCGCCTCTCTTTTTGGAAGGCCAGCTCCTCTTAAACAAATTAGCAGGGTCCTCTTTGCCGAACCTCGACGTGTGATAAGATGTTTCCATGTCTTGGTTTCTGGCTCTGTCAGTTTTTGGGACCTGCTTCTAATCGTCTGGACCCTTGCGTCGAGACATCGTTCGAGCATGTGCCTCCCTTCTCGGGAAGCTCCCTCGACCCCATGACC	Fungi	Basidiomycota	Agaricomycetes	Russulales	Russulaceae	Lactarius	russula-lactarius	KF433003	100	5e-142	100
OTU550	23_562378|F|ITS2;size=49672;	LT980724	AATTTCTCAAGCTTGGATGGATTTTTTCTGTCCTTAGTTTGGTTGTTGGGCTTTGCCGTGTCTCTTCATTGGAACGGCTGGCCTTAAAAGCATTAGCTGATCCTCGTGTGGCACTGGTTCTACTCAGCGTGATAACATTCTGATCGTTGAGGACATCTTTTGGGATGGCCGGTCTTCATTTGGGTTGCTTCTAAACCTGGTTTTTACAGTTTGTTTCAATCTGTATTCCACTTTTCAA	Fungi	Basidiomycota	Agaricomycetes	Cantharellales	Clavulinaceae	Clavulina	clavulina	JF273551	100	1e-122	100
OTU551	23_562401|F|ITS2;size=7936;	LT979852	AATCTTCAAAATCCTTTTTTCTTCTTAAAGGGTTTTGGACTTGGAGGTTTAATGCTCGCCCTTTCTTTTGAAAGTGAGCTCCTCTCAAAAGAATTAGTGGGGTCCGCTTTGCTGATCCTTGACGTGATAAAATGTTTCTACGTTTTGGGTTTAGCTCTGTCCCTTGGACGCCTGCTCCTAACCGTCTCACTGACAATGATGGTGCTCTGGTCACCGACCGTCTACATCGGCGGGAGGCTGGACCCACGAAAAGAAAA	Fungi	Basidiomycota	Agaricomycetes	Russulales	Russulaceae	Russula	russula-lactarius	gb|KP731859.1	100	1.06e-106	94.55
OTU552	23_564598|F|ITS2;size=3359;	LT980725	AATTTCTCAGGCTTGGGTGATAATTTCTTTTGTCTTTGTCCCCCTAAGCTTGGTTGTTGGGCTTTGCCGTGTCCTTTCGTTAGGGACGGCTGGCCTTAAATTGATTAGCTGACCCTCATGTGATACTGGTTCTACTCAGCGTGATAACAGTCTGATCGCTGAGGACATCTTTTGGGATGGCCAGTTCTCATTTTTTGGGGGGTTGCTTCCAAACTTGGTTTTGCAGTGCCGGATTCCTTCTGGGTCTGCATTCCATTTTTCAG	Fungi	Basidiomycota	Agaricomycetes	Cantharellales	Clavulinaceae	Clavulina	clavulina	gb|KT447177.1	69.96	1.88e-59	90.81
OTU553	23_565345|F|ITS2;size=4819;	LT979853	ATACTCTCAACCTTCTTGGTTTCTTTGACCAGGAAGGCTTGGACTTTGGAGGTTTTTCTTGCTGGCCTTCTTTTGAAGCCAGCTCCTCCTAAATGAATCGGTGGGGTCCGCTTTGCTGATCCTTGACGTGATAAGCATTTCTTCTACGTCAAGTCAGCTCGGAACCTGCTTTCTAACCTTTGAGTTACAGCGTAACTCGACCCTCATAAA	Fungi	Basidiomycota	Agaricomycetes	Russulales	Russulaceae	Russula	russula-lactarius	KM085395	85	2e-75	95.03
OTU554	23_568620|F|ITS2;size=1182;	LT980246	AAATCTCAACCTCCTCGGTTTCTTCTGGACCCCGAAGGAGGCTTGGACTTTGGAGGGCTTTGCTGGACTTGAAACGTCAGCTCCTCTCAAATGAATTAGCGAGGTCCCCTTTGCCGATCCTCGACGTGTGATAAGACGCTTCCACGTCTCGGTCTTTGGCTCTGTCGCCTCTTGGGACCTGCTTCCAATCGTCTCTTGATGAGACAACGTTCGAGCACGCCTCGACCCACGTAC	Fungi	Basidiomycota	Agaricomycetes	Russulales	Russulaceae	Lactarius	russula-lactarius	KF241540	100	2e-101	95.3
OTU555	23_568671|F|ITS2;size=604;	LT980247	AAATCTCAACCTCCTTGGTTTCTTCTGGAGGCTTGGACTTTGGAGGCCTTTGCTGGCATCTCTCCCCAGCTCCTCTTGAATGAATTAGCAGGGTCCTCTTTGCCGACCCTTGACATGTGATAAGATGTTTCCGTGTCTTGGTTTCTGGCTCTGTTGCCTTTGGGACCCGCTTCTAACCGTCTCGACTCGAGACAATGTTCGAGCCCGTCTCCCTTCTTGGGAAACGCCTCTCGGCCCCACGAAC	Fungi	Basidiomycota	Agaricomycetes	Russulales	Russulaceae	Lactarius	russula-lactarius	KF432976	89	2e-101	97.25
OTU556	23_569243|F|ITS2;size=1220;	LT980726	AATTCTCAGGCCGGGGGTCTCTTTTCAGAGTCGCCTTAGTCTGGCATTGGGCTTTGCTGTGTCCATTGATTGGAATGGCTGGCCTTAAAGACATTAGCTGACCTAAGATGTGGAATTGGTTCTACTCAGCGTGATAATGACCTGACCGTTGAGGACATCTTTCGTGATGGCCAGTTCCCATTTGGGTTGCTTCTAATCATGGTATCTTGGGTCCGTTTTGTGGATCTGATTTACTTTCTTTCA	Fungi	Basidiomycota	Agaricomycetes	Cantharellales	Clavulinaceae	Clavulina	clavulina	dbj|AB546473.1	48.97	3.24e-37	91.67
OTU557	230_4830551|F|ITS2;size=27;	LT979525	TACTCTCACACTCTCTGATCCTTTGGATTGGGAGTGGTGGACTTGGGTGTTGCTGTTACTGTTACTGCGCGGCTCACCTCAAATGCATTAGTGCAACTCCTGGTTGGACATAGTACGGCGTGATAAGTGTCTTCGCCGGCGCCTTGAAAGAGGGTGGCTGATCGGGAGCTCTGTGCTTCAAACTGTCCTCGGACAATCTCTGACA	Fungi	Basidiomycota	Agaricomycetes	Sebacinales	Sebacinaceae	Sebacina	sebacina	dbj|LC013797.1	100	1.7e-79	93.72
OTU558	230_4831703|F|ITS2;size=13;	LT979526	GTACTCTCACACTCTCCAATCCTTTGGATCCGGGGAGTGGTGGACTTGGGCGTCTGCTGCTTGACTGTGGCTCGCTTTAAATGGATTAGTGCAACTCTTGGTTGGACATAGTACGGCGTGATAAGTGTCTTCGCCGGCGCCTTGAAAGAGGGTGGCTGATCGGGAGCTCTGTGCTTCTTAAACTGTCTTCGGACAATATCTGACA	Fungi	Basidiomycota	Agaricomycetes	Sebacinales	Sebacinaceae	Sebacina	sebacina	gb|KF000635.1	100	1.69e-84	95.12
OTU559	231_4855043|F|ITS2;size=41;	LT981128	GAACCTCTCAAAGGGTTTTTGACTGAGAGAGCCCTTTGGATTTGGGTCTTGCCGTGAATCTATCCATCTCGGCTCACCTTGAAAGTATTAGCAAGCCTTTCTCAGTATCCAAAAGTCATTTGATGAAGGCGTTCTTAAAAGTTGACCTCTTTTTACGTCTGAATCATTGAGACAAGTGCGCTTTGAAACTTGCTTCCAATCATCCTTCATAGGATGGGCTCATTGGAGTCCCCTTTCAATCTAT	Fungi	Basidiomycota	Agaricomycetes	Cantharellales	Cantharellaceae	_	cantharellus	JQ991671	77	7e-46	85.35
OTU560	231_4856058|F|ITS2;size=18;	LT979854	AATTCTCAAAATCCTTTTCTTTGACTGGAATAGGAATTTTGGACTTGGAGGTTCAATGCCCGCTTTCGCCTTTGAAAGCGAGCTCCTCTCAAATGAATTAGTGGGGTCCGCTTTGCTGAGCCTTGACGTGATAAAATGTTTCTACGTTTTGGATCTGGCACTGTTTTCTCTGCTCCCAACTGTCCCATGGACAACGATGGGGCTTCGGTCGCTGCCATTTTACGGCGGAAGGCTGAACCCATGAAGAA	Fungi	Basidiomycota	Agaricomycetes	Russulales	Russulaceae	Russula	russula-lactarius	JN944011	100	8e-95	91.97
OTU561	231_4857083|F|ITS2;size=12;	LT978608	ACAACCATTTCACATCTTATGTGGTATTGGCTGATGTGGATGATGGCACTTGCGGTGCTTGTCCCACTCAGCTGAAATATATCGGCCAGAGAAGCAAGCCATGGCAACAGACTCACAGAGTGTTATACAATGCTAAACTAGTCTGGAGCAGGTTGGAATCTGTGCCACTGGACCCCCCGTTCATCAAAACTAAAAGA	Fungi	Ascomycota	Pezizomycetes	Pezizales	Tuberaceae	Tuber	tuber-helvella	DQ478623	99	2e-95	98.97
OTU562	231_4857249|F|ITS2;size=5563;	LT979855	ACACCCTCAACCTTCTTGGTTTCTTGATCAGGAAGGCTTGGACTTTGGAGGTTTTTCTTGCTGGCCTTTCTTTGAAGCCAGCTCCTCCTAAAAGGATTAGTGGGGCTCGCTTTGCCGATCCTTGACGTGATAAGTATGCTTCTACGTCTTGGGTTTCGAACGAACCCGCTTCAAACCGTCTTTGAACAAAGACAACGTTCGAGTTGCATTGCGACTCGAACACAGCGA	Fungi	Basidiomycota	Agaricomycetes	Russulales	Russulaceae	Russula	russula-lactarius	KC505584	100	4e-117	100
OTU563	231_4857430|F|ITS2;size=9;	LT978812	ACACCTCAACTCTCATGGTCTGCCATGACGAGCTTGGACTTTGGGGGTCTTGCCGGCCTAGCGTCGGCTCCTCTCAAATGGATCAGCTTCCCAGTGTTTGGTGGCGTCACAGGTGTGATAACTATCTACGCTTGTGGTTTTCCGCCATTAACCTTCAGCGATGGAGGTTCTCTGGGGCTTACAAAAGTCTCTCCTCGGTGAGGACAGCTCTTTGAAT	Fungi	Basidiomycota	Agaricomycetes	Thelephorales	Thelephoraceae	Tomentella	tomentella-thelephora	gb|KM403047.1	99.54	7.82e-88	94.47
OTU564	231_4858997|F|ITS2;size=3;	LT980362	TGAACTCTCAAAGCCCACGTCTTGACGTGGCTTTGGACTTGAGGGCTTTTGCAGGCTTTTTGATCAAAAGCCTGCTCCCTTGAAAATCATCAGTGGTATCTGGAGCGGAAACCGCTAGGTGTTGATAACATTTCATCTATGCCTTTGGGTATGCCGCGTAAATGTGCTGCTTCCAACGGCCCCATGCTCTTTGACAA	Fungi	Basidiomycota	Agaricomycetes	Agaricales	Inocybaceae	Inocybe	inocybe	gb|JQ347132.1	100	8.34e-93	98.5
OTU565	232_4872165|F|ITS2;size=121;	LT980125	AATTCTCAACTGCCTTTTAGCATTTATGTTAAGGGTGAAGTTGGAGTTGGAGGATAACTGCTGGCGCGACTCAGGTTGCTTGTTGGCTCCTCTTAAATGGATGAGCTTTTCTGATGGGATTATAGCTCAGTAACGCTGATGTGATAATTATCTACGTTAGACGTGAATGGCTCCTACGGAAAAGGGATGTCTTTTGACTTGTAACAA	Fungi	Basidiomycota	Agaricomycetes	Thelephorales	Thelephoraceae	Pseudotomentella	pseudotomentella	gb|KM981765.1	100	1.78e-99	99.03
OTU566	232_4884052|F|ITS2;size=348;	LT981249	ACATCCTCAAGCCCCTCTCCAGTATGGGCTTGGATTTGGGAGGGTTTTTGCAGGCTTTGCCGTCTGCTCTCCTGAAAAGCATTAGTGGTGTCTGAAACGGAAACCGTCAGAGGACGTGATAAATGTCTGTGTCCTTGGTATGCCGTGATTGAAAGCCGCTTCCTAACCTTTTGGAATTTGAAAA	Fungi	Basidiomycota	Agaricomycetes	Agaricales	_	_	inocybe	FJ827200	78.8	3e-33	83
OTU567	232_4893573|F|ITS2;size=263;	LT978813	ACACCTCAACTCTTCATGGTTTTCCATGATGAGCTTGGACTCTGGGGGTCTTGCTGGCCTGTGGTCGGCTCCTCTCAAATGAATCAGCTTGCCGGTGTTTGGTGGGCATCACAGGTGTGATAACTATCTACGCTTGTGGTTTTCCACCAGGGTAACCTTCAGCAGTGGAGGTTCACTGGAGCTCACAAATGTCTCTCCTCAGTGGGGACAGCCCTTTAAAT	Fungi	Basidiomycota	Agaricomycetes	Thelephorales	Thelephoraceae	Tomentella	tomentella-thelephora	gb|JF304372.1	100	1.28e-110	100
OTU568	233_4897839|F|ITS2;size=297;	LT980182	TAATTCTCAACCATGTCTTGTAACTGAGGCTTGGCTTGGACTTGGGGGTTGCTGGCAGCGAAAGCGGTCGGCTCTCCTGAAATGCATTAGCGACGGACTGCAAGTCTGACGTGCACGGCCTAGACGTGATAATGATCGTCGCCGCTGGAGCGTCCGGACGAGCGACACACGAAGTCTGTTTGCTTCCAATTCCCCTTTGACTTGGGACTTTCGAGCCAAGCCTAGCTACTAGTCACCGACGAACGCAGGCAAGGCTTTTTCGTCCCTCGTCTTCATCGACG	Fungi	Basidiomycota	Agaricomycetes	Boletales	Boletaceae	Octaviania	boletus	gb|DQ974748.1	58.36	4.46e-51	89.88
OTU569	233_4897976|F|ITS2;size=4;	LT978566	TAATTCTCAACCATGTCTTGTAACTGAGGCTTGGCTTGGACTTGGGGGTTGCTGGCGGCCTAGGTCGGTCGGCTCTCCTGAAACGCATTAGCAAAGGGCAGCAAGTCTGTGATGTGGCACGGCCTTTTCGACGTGATAATGATCGTCGTGGGCTGGAAGCGTCCGGACATGCATTCATTGTCTTGTTTGCTTCCAATTCCCCTTTGACTTGGGACTTTCGAGCCAAGCCTAGCTACTAGTCACCGACGAACGCAGGCAAGGCTTTTTCGTCCCTCGTCTTCATCGACG	Fungi	Basidiomycota	Agaricomycetes	Boletales	Boletaceae	Xerocomus	boletus	KJ609174	68	2e-96	98.99
OTU570	233_4898936|F|ITS2;size=52;	LT978567	TAATTCTCAACCATGTCTTGTAACTGAGGCTTGGCTTGGACTTGGGGGTTGCTGGCGGCCTAGGTCGGTCGGCTCTCCTGAAACGCATTAGCAAAGGGCAGCAAGTCTGTGATGTGGCACGGCCTTTTCGACGTGATAATGATCGTCGCCGCTGGAGCGTCCGGACGAGCGACACACGAAGTCTGTTTGCTTCCAATTCCCCTTTGACTTGGGACTTTCGAGCCAAGCCTAGCTACTAGTCACCGACGAACGCAGGCAAGGCTTTTTCGTCCCTCGTCTTCATCGACG	Fungi	Basidiomycota	Agaricomycetes	Boletales	Boletaceae	Xerocomus	boletus	KJ609174	58	5e-73	96.45
OTU571	233_4899941|F|ITS2;size=3;	LT978814	ACACCTCAACTCTTCATGGTTTTCTGTGATGAGCTTGGACTTTGGGGGTTTTGCTGGCCTGCGGTCGGCTCCCCTAAAATGAATCAGCTTGCCAGTGTTTGGTGGGCATCGCAGGTGTGATAACTATCTACGCTTGTGGTTTTCCACCAGGGTAACCTTCAGCAGTGGAGGTTCGCTGGAGCTCACAGATGTCCCTCTTCGGTGAGGACGGCCCTTTGAAT	Fungi	Basidiomycota	Agaricomycetes	Thelephorales	Thelephoraceae	Tomentella	tomentella-thelephora	EF611127	100	7e-100	96.38
OTU572	234_4915783|F|ITS2;size=12;	LT981031	AATTCTCAACCATCCTTTGATTGATTTCGAGGGGTGGCTTGGATTTTGGGAGTTGCTGGCTGGTCAAGACCCCCTTGGGGGGACTGGTCGGCTCTCCTTAAAAGCATTAGCGAAAGGTGGCAAGCCCTGCATGTACGGCCTTCGGCGTGATAATGATCGTCGTGGCTGGAGTGCGAGGCATGAATCTAAACCCTTTGCTTCTAAACGTTCGTACTGGGGACTTTGCTTCGGCGGACGAACCTTTACTTTCTGACG	Fungi	Basidiomycota	Agaricomycetes	Boletales	Melanogastraceae	_	paxillus-gyrodon	KC179048	98	9e-75	87.3
OTU573	236_4949175|F|ITS2;size=1405;	LT980862	AATTCTCAACCCCACCGATTTGCTTCGGGGGGATTGGACTTGGAGCGTGCTGGCGAAGGTCGGCTCCTCTTTAAATGCATCAGTGGAGGGAAACTCGCCCCAGTGTGATAATCCTGTTGCGCTGTGGTGGGTGAAAGTCTGCTTCCAACCGTCCTCCGGGACATACACCATCTTA	Fungi	Basidiomycota	Agaricomycetes	Atheliales	Atheliaceae	Amphinema	amphinema-tylospora	EU292253	100	2e-84	98.86
OTU574	236_4949360|F|ITS2;size=21;	LT980363	AGTTCTCAACTGCACTAGTTCTTTCTGGTGCAGCTTGGATGTGGGGGTGTTTTTTGCAGGCTTTTCAAAGTCGGCTCCCCTGAAATGCATTAGTGGTCTCCTAGCAGAGAAACTGCTACAGGTGTGATAATTATCTATGCCTTTAGTACTCTGCAAGAATGGATTGCACTGCTTCTTAACAAGTGAATCCCTGTTATGGGGAGTGCACATTTGACAA	Fungi	Basidiomycota	Agaricomycetes	Agaricales	Inocybaceae	Inocybe	inocybe	AB848498	100	3e-109	99.54
OTU575	236_4949438|F|ITS2;size=47;	LT980475	ATATATAATCAAATTTTAGTTTAGTGCTGAAATTTGGATCATGTCAAAGAAGCTATTACTATTATTGTGATATCCCTTTGGAAATCAATAGGTCTTCAAGTTGCTATTCATGGAACGTGATGAGAATTACTTCGTTCTATTTTAGTGGCTTGTATAGTCCTGAAACTTGTATGCCTTTGGCATTTCTTATT	Fungi	Ascomycota	Pezizomycetes	Pezizales	Pezizaceae	Hydnobolites	marcelleina-peziza	JN102461	98	1e-66	91.01
OTU576	236_4950577|F|ITS2;size=8310;	LT980481	ACAACCAGTTCAATCCCTTTTGAAAATTATTTGGGGGATTGGTTATTGGTGAATGAGGGGATGCGTGAATCACGTTGAATCACCTCACCACCGAAATTCAGAGGCGGTTTGTCCCCATGTGTTTGTGGCGTTGTAAAGGCTTACCAGCACTATTCGCTCGCATCGTGGGTGCACTGCTTGCCATTGGAGAAATCCCCATTCGTCAAA	Fungi	Ascomycota	Pezizomycetes	Pezizales	Pyronemataceae	Humaria	genea-humaria	HM105553	100	2e-100	98.55
OTU577	236_4951291|F|ITS2;size=7;	LT978585	AATACCTCTCAAGCAAATTTGCTTGGTCGTGGAAGATGAGTATGCTTGCATTCTCCCTTCTGAAATTCAAAGGCGGATGATCTCATATCCCCAGGTGTAGTAAGTTTATCTTTTCGCTTGGTGTGTGTGATTGCCCTGCCGTTGACCTCCATGTTTTTCAA	Fungi	Ascomycota	Pezizomycetes	Pezizales	Pyronemataceae	Wilcoxina	wilcoxina	gb|KU586953.1	100	1.33e-75	99.38
OTU578	236_4957847|F|ITS2;size=176;	LT978815	ACACCTCAACTCTCATGGTTTGCCATGATGAGCTTGGACTTTGGGGGTCTTGCTGGCCTATGGTCAGCTCCTCTCAAATGAATCAGCTTGCCAGTGTTTGGTGGCATCGCGGGTGTGATAACTATCTACACTTGTGGTTTTCCACCAGATAACCTTCAGTGATGAAGGTTCGCTGGAGCTCACAAATGTCTCTCCTCGGCGAGGACAGCTTTCTGAAC	Fungi	Basidiomycota	Agaricomycetes	Thelephorales	Thelephoraceae	Tomentella	tomentella-thelephora	gb|KP783482.1	100	6.02e-104	98.62
OTU579	237_4974400|F|ITS2;size=2;	LT978816	ACACCTCAACTCTCATGGCTTGCCATGATGAGCTTGGACTTTGGGGGTTTTGCTGGCCCTGTGGTCAGCTCCTCCTAAATGCATCAGCTTGCCAGTGTTTGGTGGCATCACGGGTGTGATAACATCTACGCTTGTGGTTGCCTGCCAAGTAACCTTCAGCAGTGGAGGTTCACTGGAGCTCACAGATGGTCTCTCCTCAGCGAGGATGACTCTTTGAAT	Fungi	Basidiomycota	Agaricomycetes	Thelephorales	Thelephoraceae	Tomentella	tomentella-thelephora	HM189968	100	1e-77	90.58
OTU580	237_4979947|F|ITS2;size=6;	LT978817	ACACCTCAACTCCCATGGTTCGCCATGGTGAGCTTGGATTTTGGGGGTTTTGCTGGCCTATGGTCAGCTCCTCTCAAATGAATTAGCCTGCCAGTGTTTGGTGGGCATCACAGGTGTGATAACTATCTACGCTTGTGGTTTTCCCACCAGGTAACCTTCAGCAGTGGAGGTTCACTGGAGCTCACAGATGGTCTCTCCTCGGCGAGGACGACTCTTTGAAT	Fungi	Basidiomycota	Agaricomycetes	Thelephorales	Thelephoraceae	Tomentella	tomentella-thelephora	HQ433170	100	5e-87	92.79
OTU581	237_4980275|F|ITS2;size=1725;	LT978818	ACACCTCAACTCTCACGGTTTGCCGTGATGAGCTTGGACTTTGGGGGTCTTGCTGGCCTATGGTCAGCTCCTCTCAAATGGATCAGCTTGCCAGTGTTTGGTGGCATCGCAGGTGTGATAACTATCTACGCTTGTGGTCTCCCACCAGGTAACCCTCAGCAAATGGGGGTTCGCTGGAGCTCATAAATGTCTCTCCTCAGTGAGGACAGCTTTTGAAC	Fungi	Basidiomycota	Agaricomycetes	Thelephorales	Thelephoraceae	Tomentella	tomentella-thelephora	emb|FM992972.1	100	1.01e-101	98.17
OTU582	237_4983660|F|ITS2;size=3;	LT980334	AATTCTCAACCTTTCCATTAATTTAATTTGGTTTGGCTTGGATGTGGGGGTTGCAGGCTTCATTTGACTATGAGGTCAGCTCTCCTTAAATGCATTAGTGGAACTTTTGTTGACCGTCTATTGGTGTGATATCTATCTACACTGTGGATGTGAAGCAGTGTTCAGCTTCTAACCGTCTATTATTGACTTTACTTGACC	Fungi	Basidiomycota	Agaricomycetes	Agaricales	Hydnangiaceae	Laccaria	laccaria	gb|JQ347174.1	100	3.91e-86	96.97
OTU583	238_4996551|F|ITS2;size=29;	LT981144	ATATCATCAATGCGCTAGTATTGGAAGTGGAGGTTGCTGTTGACAAGACAGCTCTTCTGAAATAAATGGTAGACGGCTTTGGCGTGATAAATGATCGTCAAGTCCGATGGCCAGACATAAATCACTTAGCTACTAGGTAGTCTTTTTTCAAAGACTAGCGAACACAAGTGTAGTCTAATTGGG	Fungi	Basidiomycota	Agaricomycetes	Boletales	Boletaceae	_	boletus	gb|JQ991658.1	89	1e-65	95
OTU584	238_5010387|F|ITS2;size=7;	LT978819	ACACCTCAACTCCCATGGTTCGCCATGGTGAGCTTGGATTTTGGGGGTTTTGCTGGCCTATGGTCAGCTCCTCTCAAATGAATTAGCCTGCCAGTGTTTGGTGGCATCACAGGTGTGATAAATATCTACGCTTGTGATTGCCTGCCAGGTAACCTTCAGCAGTGGAGGTTCACTGGAGCTCACAGATGGTCTCTCCTCGGCGAGGACGACTCTTTGAAT	Fungi	Basidiomycota	Agaricomycetes	Thelephorales	Thelephoraceae	Tomentella	tomentella-thelephora	emb|LN909647.1	94.52	8.52e-78	92.79
OTU585	239_5013937|F|ITS2;size=216;	LT978820	ACACCTCAACTCCCATGGTTCGCCATGGTGAGCTTGGACTTTGGGGGTTTTGCTGGCCTGTGGTCAGCTCCTCTCAAATGAATTAGCCTGCCAGTGTTTGGTGGCATCACAGGTGTGATAAATATCTACGCTTGCGATTGCCCACCAGGTAACCTTCAGCAATGGGGGTTCGCTGGGGCTCATAGACGTCTCTCCCTCAGCGAGGACAGTTTTTAAC	Fungi	Basidiomycota	Agaricomycetes	Thelephorales	Thelephoraceae	Tomentella	tomentella-thelephora	emb|HE814132.1	100	4.68e-100	97.71
OTU586	239_5014009|F|ITS2;size=671;	LT981075	TGGTGTCCGTATCTCCAGGCCTCCCCGGGAGGGGAGGGCCGGGGTGTTGGGTTGTGCCATCCTCGGCGAGTGAGGATGGGCCTCAAATGGAGTGGCAGCAATCGGGTCCGGTCCCAGAGCATGATGGGGCTATCGTCACCGGCTCTGGAGGACTGGATTCCGGTCGCTAGCCCAAGGGATCAACCATTCT	Fungi	Ascomycota	Eurotiomycetes	Eurotiales	Elaphomycetaceae	_	elaphomyces	UDB018623	93	9e-54	88.11
OTU587	239_5014090|F|ITS2;size=879;	LT981217	TGATCTCAATTCCCTTAGGCTTTGTGAATGCAGGCCTGTCCCTAGGGTATTGGATTTGGGGGTTCATGCAGGCTCCTTGTAGGGCTAGCTCCCCTTAAATATATTAGCTTTGGAGGATGAAGCAAAAAGGCTCTTAGTATCTGTTCATTGGCTATGGTGTAATAATTGTTCCATCATGGCATTTATCGATGAATCAGTGCATGGGAAATAACCAGGGAGACTTTTGCAGCATTCTCTGCTTCTAATTTGGTCAGATCTATCTGATAATTCATATC	Fungi	Basidiomycota	Agaricomycetes	Hymenochaetales	_	_	coltricia	FR731321	84	4e-54	83.81
OTU588	239_5019204|F|ITS2;size=5673;	LT980248	AAATCTCAACCTTCTCGGTTTTCTTCTGGACACCGAAGGAGGCTTGGACTTTGGAGGCCTTTGCTGGCATCTCTCTCTTCTTGAGAGCCAGCTCCTCTTAAACGAATTAGCGGGGTCCTCTTTGCCGATCCTCGACATGTGATAAGATGTTTCCATGACTTGGTTTCTGGCTCTGTTGCCTTTGGGACCCGCTTCTAACCGTCTCGACGAGACAACGTTTGGGCGTGTCTCCCTTCTCGGGAGACTCTCTCAACCCCACGAAC	Fungi	Basidiomycota	Agaricomycetes	Russulales	Russulaceae	Lactarius	russula-lactarius	EU711591	100	2e-135	99.62
OTU589	24_576028|F|ITS2;size=171;	LT979527	TACTCTCACACTCTCTGATCCTTTGGATTCAGCGAGTGGTGGACTTGGGTGTTTGCTGCTTTCCTTGTGGCTCACCTCAAATGTGTTAGTGCACCTCTTGGTTGGACATAGTACGGCGTGATAAGTGTCTTCGCCGGCACCTCGCAAGAGGGTGGCTGATCGGGAGCTCTGTGCTTTCAAACCGTCATTCGACAATCACTGACA	Fungi	Basidiomycota	Agaricomycetes	Sebacinales	Sebacinaceae	Sebacina	sebacina	emb|LN911460.1	100	1.66e-99	99.51
OTU590	24_576088|F|ITS2;size=15326;	LT980119	AATTCTCAACCATGTGTCTTGATTGATTCATGGCTTGGAGGTTGGGGGTTGCTGGCGGCGATCTGGCTGTTGGCTCTCCTGAAATGCATTAGCAAAAGGGGTGTGGAATGTCTTTAATGGCGTGCACGGCCTTCGATGTGATAATGATCGTCGTGGCTGGAGCGCCTGGAAAATCTCCCCTCTCCCTCATGCTTCTAATCTGTATTGCTAGCCAGTGTTCTGGCTAGCTTTCTTGTGA	Fungi	Basidiomycota	Agaricomycetes	Boletales	Boletaceae	Pulveroboletus	boletus	emb|LN911918.1	100	2.24e-118	99.58
OTU591	24_585946|F|ITS2;size=2316;	LT980566	ATATATATATCAACCTTCTCTTTTTATGAGTGGGCTTGGATGTGGGGGTTTGTTGGCCTTGTAAAGGGTTCAGCTCCCCTGAAATGCATTAGCAGAACAACCCTGTTCATTGGTGTGATAAACTATCTACGCTATTGAATGTAAGGGGGGCAGTTCAGCTTTCTAATAGTCCTTGGACAAACTTATCATTTAA	Fungi	Basidiomycota	Agaricomycetes	Agaricales	Cortinariaceae	Cortinarius	cortinarius	HM146806	98	2e-74	93.68
OTU592	24_586697|F|ITS2;size=3593;	LT980567	ATATATCAACCTCTACAGCTTTTGCTTGTTTGAGTGTTGGATGTGGGGGTTTATCTTTTTGCTGGCCTTTTATGAGGCCAGCTCCCCTGAAATTCATTAGCAGAACAATTTGTTAACCTGTTCATCGGTGTGATAACTATCTACGCTATTGATGGAAAACAGTTCAGCTTCTAATAGTCCATTGAGTTGGACAATTTTTTATTATTA	Fungi	Basidiomycota	Agaricomycetes	Agaricales	Cortinariaceae	Cortinarius	cortinarius	UDB001090	100	5e-86	94.69
OTU593	24_587200|F|ITS2;size=467;	LT981092	ATATATTATCAACCTCAGCTTGTTGAGTGTTGGATAGTGGGGGTTTTTTGCTGGTCTCTCTTTTTTGAGGTCAGCTCCCCTAAAATGTATTAGCAGAACAATTTGTTGACCCGTTCATTGGTGTGATAAACTATCTACACTATTGATGTGGTGAGGCAGGTTCAGCTTCTAACTTGTCTATTGACTTGTATTAATGA	Fungi	Basidiomycota	Agaricomycetes	Agaricales	Cortinariaceae	_	cortinarius	KP087974	86	7e-50	88.37
OTU594	24_587512|F|ITS2;size=1391;	LT979856	AATCCTCAAAGCCCTTTTCTTTGACGAGAAAAGGTGTTTTGGACTTGGAGGTTCAATGCTCGCTTTCCATTCCGAAAGCGAGCTCCTCTCAAATGAATCAGTGGGGGTCCGCTTTGCTGGTCCTTGACGTGATAAGATGTTTCTACGTTTTGGATCCGGCACTGTCCCTTGGATGCCTGCTTCTAACCGTCTCATAGACAATGATGGTGCCCCGGTCAACCGCCGTTTACATCGGCGGGAGGCTTGGCCCACGACATAAAA	Fungi	Basidiomycota	Agaricomycetes	Russulales	Russulaceae	Russula	russula-lactarius	gb|KJ769296.1	100	6.02e-104	93.54
OTU595	24_588359|F|ITS2;size=13751;	LT979528	GTACTCTCACACTTCCGATCGTTTGGATTGGGAGCGGTGGATTTGGGTGTTGCCGCTTTACTGAGGCTCACCTTGAATGCATTAGTGCAACTCTTGGTTGGACATAGTACGGCGTGATAAGTCTTCGCCGGCACCTCACCAGAGGGTGGCTGATCAGGAGCTCTGTGCTCCAAACCGTCCTTGGACAATGACTGACA	Fungi	Basidiomycota	Agaricomycetes	Sebacinales	Sebacinaceae	Sebacina	sebacina	gb|JX630925.1	100	6e-94	98.99
OTU596	24_589954|F|ITS2;size=11;	LT978821	ACACCTCAACTCTCATGGCTCGCCGTGATGAGCTTGGACTTTGGGGGTCTTGCTGGCCTGCGGTCAGCTCCTCTCAAATGAATCAGCTTTCCAGTGTTTGGCAGCATCACAGGTGTGATAACTATCTACGCTTGTGGTTTTCTGCCAGGTAACCTTCAGCAATGCAGGTTCGCTGGGGCTCATAAATGTCTCTCTCCTCGGTGAAGACAGCTTTGTGAAC	Fungi	Basidiomycota	Agaricomycetes	Thelephorales	Thelephoraceae	Tomentella	tomentella-thelephora	HE814073	100	1e-93	95
OTU597	24_591755|F|ITS2;size=12672;	LT979857	AATCTTCAGAAACCCTTTTCTCTTTGAACCATTGTGGTCGGGAAAGGGATTTTTGGACTTGGAGGTTTAATGCTCGCCCTTTCTTTCGAAAGCGAGCTCCTCTCAAATGAATTAGTGGGGTCCGCTTTGCTGATCCTTGACGTGATAAAATGTTTCTACGTTTTGGGTTTAGCACTGTCCCTTGGATGCCTGCTGCCAACCGTCTCACTGACAATGATGGTGCTCCGGTCACCGCCGTCTACATCGGCGGGAGGCTGGACCCACAAAAAGAAAA	Fungi	Basidiomycota	Agaricomycetes	Russulales	Russulaceae	Russula	russula-lactarius	KF002749	100	1e-142	100
OTU598	24_592753|F|ITS2;size=3072;	LT981093	ATATATCAACCTCATTCAAGTTTTGGCTTGCTGAGTGGTATGGATGTGGGGGGATCATTTTGCTGGCTTTTTTCGAGGTCAGCTCCCCTGAAATGCATTGGCGGGAATGATTTGCTGTCATTGGTGTGATAACCTATCTACGCTATTGACGTTGAAGCAGTTCAGCTCATAACAGTCCATTGAATTGGACAATCTTATTA	Fungi	Basidiomycota	Agaricomycetes	Agaricales	Cortinariaceae	_	cortinarius	AF325564	99	3e-64	89.32
OTU599	24_593135|F|ITS2;size=3181;	LT980727	AATTCTCAAACTGAGATGCTTTTTTGTTTCTCGGCTTGGTGTTGGGCTTTGCAGTCCCCTTTGATTGGGATGGCTGGCCTCAAAAGCATTAGCTGGCTTTTCATGTGGCATTGGTTCTACTCAGCGTGATAATAATCTGACCGCCGAGGACATCTTTCGAGATGGCCAATTCTCATTTGGGCTGCTTCTAATCTTGGTTGAGCAGATTCTGATCAGATCTGTTCCACTTTTCAAC	Fungi	Basidiomycota	Agaricomycetes	Cantharellales	Clavulinaceae	Clavulina	clavulina	dbj|LC035145.1	100	2.94e-107	97.45
OTU600	24_594264|F|ITS2;size=3156;	LT980728	AATCCTCAAGCTTGATCCTAAGCTTGGTAATTGGGCTCTGCTGTTCGTTTGATTGGAACAGCTGGCCTTAAAATCATTAGCTGATCCTAATGGTTGTGGTGTTGGTTTTACTCAGCGTGATAATGAATCTGACCGCTGGGGGGAAATATCTTTCGGGATGGCCAATTCTCAATCTTGGGTTGCTTCTAATTTGGCTTTTACGCATAGCATATTCTG	Fungi	Basidiomycota	Agaricomycetes	Cantharellales	Clavulinaceae	Clavulina	clavulina	HM105503	88	2e-80	94.87
OTU601	24_594329|F|ITS2;size=1465;	LT980502	AATTCTCAACCATTGTCAACTTTTGCTGATAATGGCTTGGATGTGGGGGTCTATTTTGCTGGCTTCTCAGATAGTCAGCTCCCCTTAAATGCATTAGCTGGTGCCCCGCGTGGACTGTCTATTGGTGTGATAATTATCTACGCTATAGACATCTGCAATAATAGGGTTTGCGCTGCTTCTAACAGTCTGTTGATTCAGACAATACATGACA	Fungi	Basidiomycota	Agaricomycetes	Agaricales	Cortinariaceae	Hebeloma	hebeloma-alnicola	KM390747	100	1e-102	98.58
OTU602	240_5042609|F|ITS2;size=5;	LT981172	CAACCCTCAGGCCCCTCCCCCTCCGGGGGTGTAGCCTGGCGTTGGGGTATCTGCAGTTGACCGCAGGCCCTGAAAGAAAGTGGCGGTGCCCGCTAGCACTCCGGGCGCAGTGGATGTCTTTCTCGCCCAGGACGTCTCGCGGGCCGCCGGCCGTAAAACAGACACCCCAGTCATTACAA	Fungi	Ascomycota	Sordariomycetes	Sordariales	_	_	sordariales1	JF273543	84	3e-58	94
OTU603	241_5073190|F|ITS2;size=20780;	LT980821	AATTCTCAACCATGAACTTTGAGATCATGGCTTGGAGTTGGAAGTTGCTGGCCGGACGGTCAGCTCTTCTTAAACGGATTAGCGATCGAGTTGGCTAGTCTTTGACGTACACGGCCTCGGACGTGATAATGATCGTCCTGGCTGGAGCGTCTTTTTTGTAGACTATGCAGACGGATGGCTTCTAAATAAGAATGGTCGAGCGAGCTTAGCTATTAGGCAGTCTGCTGTTTGCCAAGGCAAGGCTGGCGAACGCAAGGTTGAATTGTGGACCATGATCAGGG	Fungi	Basidiomycota	Agaricomycetes	Boletales	Boletaceae	Boletus	boletus	GQ900530	99	4e-138	98.24
OTU604	242_5087689|F|ITS2;size=1535;	LT978822	ACACCTCAACTCTCATGGTTCTGCCATGATGAGCTTGGACTTTGGAGGTCTTGCTGGCCCCTGTGGTCAGCTCCTCTCAAATGGATCAGCTTGCCAGTGTTTGGTGGCATCACAGGTGTGATAACTATCTACGCTTGTGGTTTTCCACCAGGTAACCTTCAGTGATGGAGGTTCGCTGGAGCTCATAAACGTCTCTCCTCAGCGAGGACAGCTTCTTGAAC	Fungi	Basidiomycota	Agaricomycetes	Thelephorales	Thelephoraceae	Tomentella	tomentella-thelephora	gb|EF471313.1	100	5.98e-109	99.55
OTU605	244_5137793|F|ITS2;size=2507;	LT981110	AATTGTCAGACTGTTGAAGCTTTTTGACTTTGGTTAAAAGTTATCTCAGTTTGGTGTTGGGCTCTGCCGTGCCTTATAGGAACGGCTGGCCTTAAAAGCATTAGCCCTGACCCTTGTGAGTGTGTTGGTTCTACTCAGTGTGATAATTGCTTCTGACCACTGAGGACATCTTCCGAGATGGCCAATTCTCATTTGGGGTTGCTTCTAATCTGGTTGGCAGGTTGCTGAATCTGCCCCACACTTCTAA	Fungi	Basidiomycota	Agaricomycetes	Cantharellales	Clavulinaceae	_	clavulina	KM576340	100	3e-79	88.54
OTU606	244_5138628|F|ITS2;size=36705;	LT979529	GTACTCTCACGCTTTGGATCCTTTGGATTTGGAGTGGTGGACTTGGGTGTTGCTGCTTTGCAGCGGCTCACCCCAAATGCATGCGTGCAACTCCTGGTTGGACATAGTACGGCGTGATAAGTGTCTTCGCCGGCACCTCGCAAGAGGGTGGCTGATCGGGAGCTCTGTGCTTTCGAACCGTCCTTGGACAATGACTGACA	Fungi	Basidiomycota	Agaricomycetes	Sebacinales	Sebacinaceae	Sebacina	sebacina	gb|JF273541.1	100	5.96e-99	100
OTU607	246_5174223|F|ITS2;size=2749;	LT979858	AATCCTCAAAACCCTTTTCTTTGACGAGAAAAGGAGTTTTGGACTTGGAGGTTCAATGCTCGCTCTCGATTCCGATAGCGAGCTCCTCTCAAATGAATCAGTGGGGTCCGCTTTGCTGGTCCTTGACGTGATAAGTCGTTTCTACGTTTTGGATCTGGCACTGTCCCATGGACGCCTGCTTCTAACCGTCTCACAGACAATGATGGTGCTCCGGTCACCCGCCAGCTACTATGTTGGTGGGGGGCTTGACCCACAACAAAAAA	Fungi	Basidiomycota	Agaricomycetes	Russulales	Russulaceae	Russula	russula-lactarius	gb|JQ991784.1	100	5.77e-134	100
OTU608	247_5194288|F|ITS2;size=68;	LT979470	CGAATTCTCAACCACGTTCCGGCGTGGCTTGGACTTGGGAGCTGCTGGCGTCGAGAGACGTCGGCTCTCCTCAAACGCATTAGCGGACCCAGCGGGTCCGGACGTGCACGGCCTAGCGTCGACGTGATAACACACCATCATCGTCGTCCGGGCTGGAGCGTTCCGGTCCTGCCTCCGCTTCCAACCCTAGCGAAGGGGCCAGCTCAGCTACTAGCCTCCCCTGGCGAACGCGAGCCGGCCTCCGACCACCATCTCGAACCCC	Fungi	Basidiomycota	Agaricomycetes	Boletales	Boletaceae	Strobilomyces	boletus	AB275214	98	1e-132	99.61
OTU609	247_5195636|F|ITS2;size=3113;	LT979530	GTACTCTCACACTCGCGATCTTTGGATCGCGAGCGGTGGACTTGGGTGTTGCTGCGTTACCCGTGGCTCACCTCAAATGGAGTAGTGCACCTCTTGGTTGGACATAGTACGGCGTGATAAGTGTCTTCGCCGGCGCCTCACTTGTTGAGGGTGGCCGATCGGGAGCTCTGTGCTTCAAACCGTCTTCGGACAACAACTGACA	Fungi	Basidiomycota	Agaricomycetes	Sebacinales	Sebacinaceae	Sebacina	sebacina	gb|HM105524.1	100	4.7e-85	95.57
OTU610	247_5200134|F|ITS2;size=1128;	LT978823	ACACCTCAACTCTCATGGTTTGCCATGATGAGCTTGGACTTTGGGGGTCTTGCTGGCCTATGGTCAGCTCCCCTAAAATGAATCAGCTTGCCAGTGTTTGGTGGGATCACAGGTGTGATAACTATCTATGCTTGTGGCCTTCCACCAATCAACTTCCAGCAATGGAGGTTCGCTGGAGCTCATAAACGTCTCTCCTCAGTGAGGACAGCTCTTTTGAAT	Fungi	Basidiomycota	Agaricomycetes	Thelephorales	Thelephoraceae	Tomentella	tomentella-thelephora	gb|AF272943.1	100	3.56e-101	97.72
OTU611	247_5201324|F|ITS2;size=11;	LT980249	AATTCTCAACCTCCTTGGTTTCTTCTGGAGACTGAAGGAGGCTTGGACTTTGGAGGCCTTTGCTGGCATCACTTGCCAGCTCCTCTTAAACGAATTAGCGGGGTCCTCTTTGCCGACCCTCGACATGTGATAAGATGTTTCCATGTCTTGGCTTCTGGCTCTGTCACCTTTTGGTTGGGACCTGCTTCTAACCGTCTTTGTGAAGACAACGTTCGAGCTCGTCTCCCTTCTCGGGAAACCCCCTCGACCTCACGAAC	Fungi	Basidiomycota	Agaricomycetes	Russulales	Russulaceae	Lactarius	russula-lactarius	gb|KJ173922.1	100	3.13e-91	90.94
OTU612	248_5209332|F|ITS2;size=1940;	LT981070	CATCCTCGAATCCGAGGTCCCTCTCGAGGGGATGCGGAATCCGGAACTTGGGGGTTGCGGGCACACGTCCTCGTGGACGGGGTCGGCTCTCCTGAAACGTATCAGCGGGAGAGGGATGGCATCGCGACGGAGCACGACCTTTTTCCCTCGACGTCGTAAGGATCGTCGTGGGGGCTAGGGATCTCGTGAGCGATGGTCGTCCGTCTCGGGCTTCCAGTCACACACGAACCCGTGTCTCAGG	Fungi	Basidiomycota	Agaricomycetes	Boletales	Gyroporaceae	_	pisolithus-scleroderma	FM999661	91	3e-69	89.19
OTU613	248_5209337|F|ITS2;size=11401;	LT978647	AATTCTCAACCGCCCCAAGCTCTTTGTGGGTCAGGTTGGATCTTGGAGGATATTGCTGGTGTGTGCTCCGTGCACGCTTGTCGGCTCCTCTTGAATGCATGAGCTTTCCAGTCCTTGGCAAAGTATCGTCGATGTGATAGTTATCTGCGTCGTCCGAGAAAAGCCGTGCAAGGGGAAATCTACGATTGTATCGGCCCTTCGGGGTTCCGTGTCTGACAA	Fungi	Basidiomycota	Agaricomycetes	Thelephorales	Thelephoraceae	Tomentellopsis	tomentellopsis	AB218098	100	9e-109	99.09
OTU614	248_5209403|F|ITS2;size=3099;	LT978648	AATTCTCAACTGCCCCAAGCTCTTTGCGGGTCAGGTTGGATCTTGGAGGACATTGCTGGTGCGTGCTCTGTGCACGCTTGTCGGCTCCTCTTGAATGCATGAGCTTTCCAGTCCTTGGCAAAGTATCGTCGATGTGATAGTTATCTGCGTCGCCCGAGAAAAGCCGTGCAAGGGGAAATCTACGATCGTATCGGCCCTTCGGGGTTCCGTGTCTGACAA	Fungi	Basidiomycota	Agaricomycetes	Thelephorales	Thelephoraceae	Tomentellopsis	tomentellopsis	AB218098	100	9e-104	97.72
OTU615	248_5212486|F|ITS2;size=14;	LT980209	AATCCTCAACCCTTCTCCCTTTTTTGGGTGGAAAGGGTTTGGAATTTGGGGGCTTTTGCTGGCACCCCTTCTTTTGGGAGCCAGCTCCTCTTAAATGCATTAGCAGGGTTTCCTTAGCCAGATCCCCTCGACGTGATAAAGTTTTTACGTCCCAGGGCTTCTTGGTTCTAACCTGCTTCCAATCGTCTCATCTGAGACTAAAACCGAATCTGA	Fungi	Basidiomycota	Agaricomycetes	Russulales	Russulaceae	Lactifluus	russula-lactarius	HQ318286	100	6e-91	94.91
OTU616	248_5217284|F|ITS2;size=318;	LT979859	ACACACCCTCAACCTTCTTTTGGTTTTCTTGACCGGAGGAAGGCTTGGACTTTGGAGGCCTTTCATTGCTGGTATCCTTTCGGAGCCAGCTCCTCCTAAATGAATTAGTGGGATTCGCTTCGGTGATCCTCGACGTGATAAGCATTATTCTACGTCTTGGGGTTTTCGAAGTGCCTGCTTCTAACCGTCTTTAAACAAAGACAATGACCACAAAA	Fungi	Basidiomycota	Agaricomycetes	Russulales	Russulaceae	Russula	russula-lactarius	gb|KF361776.1	100	6.06e-99	97.69
OTU617	248_5219445|F|ITS2;size=9244;	LT978824	ACACCTCAACTCCCGTGGTTCGCCACGGTGAGCTTGGACTCTGGGGGTTTTGCTGGCCTGTGGTCGGCTCCTCTCAAATGAATTAGCCTGCCAGTGTTTGGTGGCGTCACGGGTGTGATAAATATCTACGCTTGCGATTGCCCACCAGGTAACCTTCAGCAATGGGGGTTCGCTGGGGCTCATAGACGTCTCTTTCAAC	Fungi	Basidiomycota	Agaricomycetes	Thelephorales	Thelephoraceae	Tomentella	tomentella-thelephora	emb|HE814192.1	96.98	2.23e-83	96.37
OTU618	248_5223154|F|ITS2;size=2;	LT981157	AATTCTCAACTCCGAGTAGACTTCTCTGTCTATCTGGAGCTTGGACTTGGAGTGTGCTGGCCTGGCTTGTCACAGGTCGGCTCCTCTTAAAAGCATCAGCAGAACGTGTGTTTAGAGCTTTTGCTGACTTTCAGTGTGATAAGTGTGTTGCACTGTTGTCTGGCATGGCGCGTGGGGTTGTCTGCCTACAATCTGTCCTTTGAGTGACCTTTTTGAA	Fungi	Basidiomycota	Agaricomycetes	Atheliales	Atheliaceae	_	atheliales1	emb|LN912354.1	92.63	4.55e-54	86.89
OTU619	249_5254286|F|ITS2;size=15501;	LT980822	AATTCTCAACCATGAACTTTGAGATCATGGCTTGGAGTTGGAAGTTGCTGGCCGGAAGGTCAGCTCTTCTTAAACGGATTAGCGATCGAGTTGGCTAGTCTTTGACGTACACGGCCTTGGACGTGATAATGATCGTCCTGGCTGGAGCGTCTCTTTTGTAGACTATGCACACGGATGGCTTCTAATAAGAATGGTCGAGCGAGCTTAGCTATTAGGCAGTCTGCTGTTTGTTAAGGCAAGGCAAGGCTGGCGAACGCAAGCGCAAGCGCAAGCTTGAATTATGGACCATGATCAGCG	Fungi	Basidiomycota	Agaricomycetes	Boletales	Boletaceae	Boletus	boletus	AB509667	99	3e-144	97.67
OTU620	25_595532|F|ITS2;size=19416;	LT980811	AATTCTCAACTTTGCTTGTCTTTTTTGTCGAGCGAAGGTTGGATTTTGGAGCGTGCTGGCGAAGGTCGGCTCCTCTTTAAATGCATTAGCGGAAAGGTCATATTTGACTTTTGCGGTGAATCGGCGTGATAATAACGTTGTTGCGTCGTTGGCCCAAAAGCTCTCTGTCCGCTTACAATGGTCTTCGGACGACTTATTATGAA	Fungi	Basidiomycota	Agaricomycetes	Atheliales	Atheliaceae	Byssocorticium	byssocorticium	FJ827177	100	3e-103	100
OTU621	25_596324|F|ITS2;size=23815;	LT980763	AATTCTCAAAGTAAAATATTTTGTTAATTCAATTGGTTTACTTTGGATTTGGAGGCTTTGCAGATTTTACAATCTGCTCCTCTTGAATGTATTAGCTGGATCTCAGTATATACTTGGTTCCACTCAGTGTGATAAGCTATCACTCACTGAGGACACCCGTAAAAAGGTGGCCAAGCAATACAGATGAACTGCTTCTAATAGTCTATTAAATTAGACAATTAATTTCAAG	Fungi	Basidiomycota	Agaricomycetes	Cantharellales	Ceratobasidiaceae	Ceratobasidium	ceratobasidium1	gb|JQ991676.1	100	5.26e-115	100
OTU622	25_599451|F|ITS2;size=271;	LT978825	ACACCTCAACTCTCATGGCTTGCCATGATGAGCTTGGACCTTGGGGGTCTTGCTGGCACATGTTGGTCAGCTCCTCTCAAATGAATCAGCTTGCCGGTGTTTGGTGGCGTCACATGTGTGATAAATATCTATGCTTGTGGCTTTCCACCAGGTAACCTTCAGCAATGGAGGTTCGCCGGAGCTCATAAATGTCTCTCCTCAGTGAGGACAGATTTTGACA	Fungi	Basidiomycota	Agaricomycetes	Thelephorales	Thelephoraceae	Tomentella	tomentella-thelephora	dbj|AB972839.1	99.55	2.88e-82	92.73
OTU623	25_601632|F|ITS2;size=4177;	LT980568	ATATATATCAACCTCTCTTGTTGAGTGGTTTGGATGTGGGGGGTTTGCTGGCATGTTCAGCTCCTCTGAAATACATTAGCAGAACAACCTGTTTCATTGGTGTGATAACTATCTACACTATTGAATGTGAGGTGTGGTTCAGCCATCTAACAGTCCTTGGACAATTTATCATTA	Fungi	Basidiomycota	Agaricomycetes	Agaricales	Cortinariaceae	Cortinarius	cortinarius	AB848472	99	1e-82	98.84
OTU624	25_613957|F|ITS2;size=8847;	LT979531	GTACTCTCACACTTCTAATTCGTTTTGGATTAGGAGCGGTGGACTTGGGTGTTGCTGCTTTACTGTGGCTCATCTCAAATTCGTTAGTGCACCTCTTGGTTGGACATAGTACGGCGTGATAAGTGTCTTCGCCGGCGCCTCATAACGAGGGTGGCCAATTGGGAGCTCTGTGCTTCAAACCGTCTTCAGACAATCTCTGACA	Fungi	Basidiomycota	Agaricomycetes	Sebacinales	Sebacinaceae	Sebacina	sebacina	HE820583	100	2e-79	93.07
OTU625	25_614786|F|ITS2;size=51432;	LT979532	GTACTCTCACACTCTCTGATCCTCTGGATTTGGGGAGCGGTGGACTTGGGTGCTTGCTGCTTCCTTGTGGCTCACCTGAAATGCGTCAGTGCATCTCTTGATTGGACATAGTACGGCGTGATAAGTGTCTTCGCCGGCACCTCGTAAGAGGGTGGCTGATCGGGAGCTCTGTGCTTTCAAACCGTCTTCGGACAATCCCTGACA	Fungi	Basidiomycota	Agaricomycetes	Sebacinales	Sebacinaceae	Sebacina	sebacina	HG796959	100	4e-102	99.51
OTU626	25_615248|F|ITS2;size=157;	LT978826	ACACCTCAACTCTCATGGTTTGCCATGATGAGCTTGGACTCTGGGGGATTTGCTGGCCTGTGGTCAGCTCCCCTCAAACAAATCAGCTTTCCAGTGTTTGGTGGCATCACGGGTGTGATAAATATCTACGCTTGTGGTTTCCTGCCAGGTAACCTTTCAGTAATGGGGGTTTGCTGGGGCTTATAAACGTCTCTCCTCAGTGAAGACAGCTTTGTGAAC	Fungi	Basidiomycota	Agaricomycetes	Thelephorales	Thelephoraceae	Tomentella	tomentella-thelephora	emb|LN909862.1	99.54	1.08e-91	95.41
OTU627	25_615333|F|ITS2;size=17525;	LT979860	AATTCTCAAACCTTCTTGGTTTCTTGACCAAGTTGGCTTTGGACTCTGGAGGTGTTTTGCTGGCTTTGCAGAAAGTCGGCTCCTCTTAAATGCATTAGTGGGGTCCCCTTTGCCAATCCCCAGGCGTGATAAGATGTTTCTACGTCTTGGGATTTGCTCTGTTCATTGGGAACCTGCTTCCAACCGTCTCGTGAGAGACATCGTTCGAGTTTGCTCGACACACGAA	Fungi	Basidiomycota	Agaricomycetes	Russulales	Russulaceae	Russula	russula-lactarius	AB831846	100	6e-116	100
OTU628	25_615648|F|ITS2;size=7634;	LT980969	AATTCTCAAAAACCCTTTTCTTTGATCGGAATAGGGCTTTTGGACTTGGAGGTTCAATGCCCGCTTTCACCTTTGAAAGTGAGCTCCTCCCAAACGAATTAGTGGGGTCCGCTTTGCCGATCCTTGACGTGATAAAATATTTCTACGTTTTGGATTTGGCACTGTTCCTTTTGGATGCCTGCTTCTAACCGTCTCACAGACGACGATGGTGCTCCGGTCTTTGCCACCTATGTTGGCAGGAGGCTTGACCCACACAAAAAATATA	Fungi	Basidiomycota	Agaricomycetes	Russulales	Russulaceae	_	russula-lactarius	FJ454982	100	2e-96	90.71
OTU629	25_616701|F|ITS2;size=14016;	LT979533	GTACTCTCACACTCTCTGATCCTTTGGATTTGGGGAGCGGTGGACTTGGGTGCTTGCTGCTTCCTTGTGGCTCACCTGAAATGCATCAGTGCATCTCTCGATTGGACATAGTACGGCGTGATAAGTGTCTTCGCCGGCACCTCATATGAGGGTGGCCGATCGGGAGCTCTGTGCTTTCAAACCGTCTTCGGACAACGCTGACA	Fungi	Basidiomycota	Agaricomycetes	Sebacinales	Sebacinaceae	Sebacina	sebacina	gb|JF748107.1	100	5.96e-99	99.51
OTU630	25_616744|F|ITS2;size=417;	LT979534	GTACTCTCACACTCTCCGATCCTTTGGATTGGGGAGCGGTGGACTTGGGTGTTTGCTGCATTCGTTGTGGCTCACCTCAAATGGATTAGTACACCTCTTGGTTGGACATAGTACGGCGTGATAAGTGTCTTCGCCGGCACCTCATATAAGAGGGTGGCCAATTTGGGGCTCTGTGCTTTCAAACCGTCTTCGGACAATCTCTGACA	Fungi	Basidiomycota	Agaricomycetes	Sebacinales	Sebacinaceae	Sebacina	sebacina	KM576576	100	3e-79	92.75
OTU631	25_617395|F|ITS2;size=11253;	LT979535	GTACTCTCACACTCTCACTCTTTGGAGTGGAGCGGTGGACTTGGGTGTTGCTGCTTTACCGCGGCTCACCTCAAATGGAGTAGTGCACCTCTCGGTTGGACATAGTACGGCGTGATAAGTGTCTTCGCCGGCGCCTCATTAGAGGGTGGCCGATCGGGAGCTCTGTGCTTCAAACCGTCCTCGGACAACAACTGACA	Fungi	Basidiomycota	Agaricomycetes	Sebacinales	Sebacinaceae	Sebacina	sebacina	gb|GQ219878.1	100	2.79e-92	98.49
OTU632	25_617757|F|ITS2;size=2465;	LT980863	AATCATCAACCTCATCGTGGGGCTTGGACTTTGGAGCGTGCTGGCCCCCTGAGGTCGGCTCCTCTTTAAATGCATCAGCGGAAAGCCATTGATGTTTCCCGTCAGCGTGATAATCCTGTTGCGCTGCTAGGTCACGTCGGGGATCCGCTTATAATGGTCTTCGGACGATATCTA	Fungi	Basidiomycota	Agaricomycetes	Atheliales	Atheliaceae	Amphinema	amphinema-tylospora	dbj|LC013706.1	100	3.04e-82	99.43
OTU633	25_619672|F|ITS2;size=2293;	LT979536	GTACTCTCACACCCTCCAATCCTCTGGATCGGGGAGTGGTGGACTTGGGCGTGTGCTGCTTGACTGTGGCTCGCTTGAAATGGATTAGTGCAACTCTTGGTTGGACATAGTACGGCGTGATAAGTGTCTTCGCCGGCACCTCGGAAGAGGGTGACTGATCTTGAGCTCTGTGCTTCAAACTGTCCTCGGACAATGTCTGACA	Fungi	Basidiomycota	Agaricomycetes	Sebacinales	Sebacinaceae	Sebacina	sebacina	gb|KF000635.1	100	4.7e-85	95.57
OTU634	25_619887|F|ITS2;size=5792;	LT979537	GTACTCTCACACTTCTGATCCTTTGGATTTGGAGCAGTGGACTTGGGTGTTGCCGCTTTGCAGTGGCTCACCTCAAATGGATTAGTACAACTCTTGGTTGACCATAGTACGGCGTGATAAGTATCTTCGCCGGCACCTCGCAAGAGGGTGGCTGATCGAGTGCTCTGTGCTTTCAAACCGTCCTCGGACAATGACTGACA	Fungi	Basidiomycota	Agaricomycetes	Sebacinales	Sebacinaceae	Sebacina	sebacina	AB848603	100	1e-91	97
OTU635	25_620084|F|ITS2;size=427;	LT979538	GTACTCTCACACTCTCTGATTTCAGATCGGGGAGAGGTGGACTTGGGTGTTGCTGCTTACCTGTGGCTCATCTCAAATGCAGTAGTGCACCTCTTGGTTGGACATAGTACAGCGTGATAAGTATCTTCGCTGGCACCTCAAATGAGGGTGTCTGATTTGGAGCTCTGTGCTTCAAACTGTCCCTTGGTTTGGACACACTCTGACA	Fungi	Basidiomycota	Agaricomycetes	Sebacinales	Sebacinaceae	Sebacina	sebacina	dbj|LC122256.1	100	3.69e-76	92.68
OTU636	25_620784|F|ITS2;size=3052;	LT978827	ACACCTCAACTCTCATGGCTTGCCCGTGATGAGCTTGGACTCTGGGGGATTTGCTGGCCTGTGGGTCGGCTCCCCTCAAATGAATCAGCTTGCCAGTGTTTGGTGGCATCACAGGTGTGATAACTATCTACGCTTGTGGTTCGCCGCCAGGTAACCTTCAGCAAATGGAGGTTCTCTGGGGCTTACAAAAGTCTCTCCTCGGTGAGGACAGCTCTTTGAAC	Fungi	Basidiomycota	Agaricomycetes	Thelephorales	Thelephoraceae	Tomentella	tomentella-thelephora	UDB013202	100	6e-101	96.83
OTU637	25_620850|F|ITS2;size=6221;	LT979539	TACTCTCACACTCTCTGATCCTTTGGATTGGGAGTGGTGGACTTGGGTGTTGCTGTTGTTACTGCATGGCTCACCTCAAATGCATTAGTGCAACTCCTGATTGGACATAGTACGGCGTGATAAGTGTCTTCGCCGGCGCCTTGAAAGAGGGTGGCTGATTGGGAGCTCTGTGCCTCTTAAACTGTCTTTGGACAATCTCTGACA	Fungi	Basidiomycota	Agaricomycetes	Sebacinales	Sebacinaceae	Sebacina	sebacina	dbj|LC013797.1	100	1.66e-99	99.51
OTU638	25_620964|F|ITS2;size=3530;	LT979540	GTACTCTCACGCTCTAATTAATTTTGGAAAAGTGGACTTGGGTGTTGCTGCTTTGCGGTGGCTCATCTTAAATATGCTAGTGCAACTCATGGTTGGATATAGTACAGCGTGATAAGTATCCTCGCTGGCACCTCTTCAAGAGGGTATCCGATTGGGGGCTCTGTGCTTCAAACTGTCCTGTCTGGGACAATCTCTGACA	Fungi	Basidiomycota	Agaricomycetes	Sebacinales	Sebacinaceae	Sebacina	sebacina	AB669655	100	1e-92	97.49
OTU639	25_621211|F|ITS2;size=6554;	LT978568	AGTTCTCAACCATGATCATCATGGCTTGGACTTGGGGGTCTGCTGAAGCCTGCTCAGCTCTCCTGAAACATATTAGCGATGAGTCCTAGTCTCTTTGGTGTGATAATGATCATCATGGAGGCTCACTTCGATTCGCTTCTAACGGAATGTGGAACGCTAGCTAGCTAGTTACTAGTCTTGGTCCTGGACTGGACCTTGGCGAACACAGCTCTCATGTGTGTCCCACCTTGAA	Fungi	Basidiomycota	Agaricomycetes	Boletales	Boletaceae	Xerocomus	boletus	AB973721	95	2e-111	99.55
OTU640	25_622869|F|ITS2;size=8573;	LT979541	GTACTCTCACACTCTCTAATCCTTTGGATTTGGGGAGCGGTGGACTTGGGTGTTTGCTGCTTTTCCTTGTGGCTCACCTCAAATGTGTTAGTGTACCTCTTGGTTGGACATAGTACGGCGTGATAAGTGTCTTCGCCGGCGCCTCGCAAGAGGGTGGCCAATCCAAAGAGCTCTGTGCTTTCAAACCGTCTTCGGACAATCTCTGACA	Fungi	Basidiomycota	Agaricomycetes	Sebacinales	Sebacinaceae	Sebacina	sebacina	gb|KF590038.1	100	1.69e-84	94.71
OTU641	25_623037|F|ITS2;size=4298;	LT979542	GTACTCTCACACTTCTGATCCTTTGGATTGGGAGCGGTGGACTTGGGTGCTGCTGCTTTACGGTGGCTCACCTCAAATGCCTTAGTGCAACTCTTGGTTGGACATAGTACGGCGTGATAAGTATCTTCGCCGGCACCTCTTGCGAGGGTGGCTGATCAGGAGCTCTGTGCTCCCAACCGTCTTTCAGACAACAACTGACA	Fungi	Basidiomycota	Agaricomycetes	Sebacinales	Sebacinaceae	Sebacina	sebacina	AB848601	100	1e-91	97
OTU642	25_623078|F|ITS2;size=12920;	LT979543	GTACTCTCACACTCTCCGATCGTTTCGATTTGGGGAGCGGTGGACTTGGGTGCTTGCTGCTTTCCTTGTGGCTCACCTCAAATGCGTCAGTGCATCTCTCGATTGTACATAGTACGGCGTGATAAGTGTCTTCGCCGGCACCTCGTAAGAGGGTGGCCAATTGGGAGCTCTGTGCTTTCCAACCGTCTTCGGACAATCTCTGACA	Fungi	Basidiomycota	Agaricomycetes	Sebacinales	Sebacinaceae	Sebacina	sebacina	KM576576	100	1e-92	96.59
OTU643	250_5270882|F|ITS2;size=1576;	LT978828	ACACCTCAACTCTCATGGTTTGCCATGATGAGCTTGGACTTTGGAGGTCTTGCCGGCCTACGGTCGGCTCCTCTCAAATGAATCAGCTTGCCAGTGTTTGGTGGCGTCACGGGTGTGATAACTATCTACGCTTGTGGTTTTCACCAGGTAACCTTCAGCGATGGAGGTTCGCTGGAGCTCACAAATGTCTCTCCTCGGTGAGGACAGCTTTTGAAC	Fungi	Basidiomycota	Agaricomycetes	Thelephorales	Thelephoraceae	Tomentella	tomentella-thelephora	HQ215810	100	4e-102	97.7
OTU644	250_5278243|F|ITS2;size=360;	LT980569	ATATATCAACCTCTTTAAATTTTGAGAGTGTTTGGATGTGGGGGTGTTATTTTGCTGGCCTTCTCCAAGGTCAGCTCCCCTGAAATGTATTAGCGGAACAATTTGTTGACCGTTCATTGGTGTGATAGCATATCTACGCTATTGACGTGAATCAAGTTCAGCTCATAACAGTCCATTGACTTGGACAATTCTCTATTTATTA	Fungi	Basidiomycota	Agaricomycetes	Agaricales	Cortinariaceae	Cortinarius	cortinarius	UDB011737	100	2e-99	99.01
OTU645	251_5280966|F|ITS2;size=4994;	LT981145	ATATCATCAATCTAGTATTGGAAGTGGAGGTTGCTGTTGACAAGACAGCTCTTCTGAAATAAATGGTAGATAGGCCAAGTTGGCTTTGGCGTGATAATGATCGTCAAGTCATGGCCAGACATAAATCACTTAGCTACTAGGTAGTCTTTTTCAAAGACTAGCGAACACAAGTGTAGTCTAATTGGG	Fungi	Basidiomycota	Agaricomycetes	Boletales	Boletaceae	_	boletus	gb|JQ991658.1	90	6e-54	91
OTU646	252_5303164|F|ITS2;size=6;	LT980250	AAATCTCAACCTCCTTGGTTTCTTCCGGAGATCAAAGGAGGCTTGGACTTTGGAGGCCTTTGCTGGCATCTCTCTCCTTTGAAAGGTGGCCAGCTCCTCTTGAATGAATTAGCGGGGTCCTCTTTGCCGATCCTTGACATGTGATAAGATGTTTCCGTGTCTCGGTTTCTGGCTCTGTTGCTTTTGGGACCCGCTTCCAATCGTCTTGACCTTGCGTCTTGACAATGTTCGAGCCTGTTGCCCTTCTCGGGAAACGCTCTCGACCCCCACGAAC	Fungi	Basidiomycota	Agaricomycetes	Russulales	Russulaceae	Lactarius	russula-lactarius	KF433015	100	2e-121	95.64
OTU647	255_5377518|F|ITS2;size=85;	LT978829	ACACCTCAACTCTCCATGGTTTTCCATGATGAGCTTGGACTTTGGGGGGTTTTTGCTGGCCTACGGTCAGCTCCCCTAAAATGAATCAGCTTGCCAGTGTTTGGTGGGCATCACAGGTGTGATAACTATCTACGCTTGTGGTTTTCCACCAGGTAACCTTCCATAGTGGAGGTTCACTGGAGCTCACAGATGTCTCTCTTCAGTGAGGACAGCTCTTTGAAT	Fungi	Basidiomycota	Agaricomycetes	Thelephorales	Thelephoraceae	Tomentella	tomentella-thelephora	JN129412	100	4e-97	95.5
OTU648	256_5385834|F|ITS2;size=58;	LT979861	ATACTCTCAACCTTCTTGGTTTTCTTTGACCACAAAGGCTTGGACTTTGGAGGTTTTTCTTGCTGGCCTCTTTTCAAGCCAGCTCCTCCTAAATGAATGGGTGGGGTCCGCTTTGCTGATCCTCGACGTGATAAGCATTTCTTCTATGTCTCAGTGTCAGCTCAGAACCCACTTTCCAACCATCTTTCGACAAAGACAGTGTTCGAGTTGTGACTGACTTTACAAA	Fungi	Basidiomycota	Agaricomycetes	Russulales	Russulaceae	Russula	russula-lactarius	emb|LN911414.1	100	4.72e-95	95.15
OTU649	258_5451056|F|ITS2;size=66;	LT979862	ATGTTCTCAACCTTATTGGTTTCTTTGAGACCAAGAAGGCTTGGAGTTTGGAGGTTTTTGTTGCTGGCCTTGTTTTGAAGTCAGCTCCTCCTAAATGAATTGGTGGGGTCCGCTTTAGCTGATCCTTGACGTGATAAGGATTTCTTCTACGTCATGTCGGCTGGGAACCTGCTTTCTAACCCTGGAGTTACATGTAACTCGACCGTTTTTATAAA	Fungi	Basidiomycota	Agaricomycetes	Russulales	Russulaceae	Russula	russula-lactarius	AB769908	69	1e-48	90.6
OTU650	260_5493517|F|ITS2;size=5;	LT980823	AATTCTCAACCATGATCTCATTTTCGAAAGAGATCATGGCTTGGAGTTGGAAGTTGCTGGCCTTCCGGCCAGCTCTTCTTAAACGGATTAGCGATCGAGTTGGCTAGTCTTTGACGTACACGGCCTTGGACGTGATAATGATCGTCCTGGCTGGAGCGTCTTTTTTGTAGACTATGCACACAGATGGCTTCTAATAAGAATGGTCGAGCGAGCTTAGCTATTAGGCAGTCTGCTGTTTGTTAAGGCAAGGCAAGGCTGGCGAACGCAAGCTTGAATTATGGACCATGATCAGCG	Fungi	Basidiomycota	Agaricomycetes	Boletales	Boletaceae	Boletus	boletus	HE814204	90	4e-119	95.57
OTU651	260_5496059|F|ITS2;size=16;	LT980824	AATTCTCAACCATGATCTCATTTTCGAAAGAGATCGTGGCTTGGAGTTGGGAGTTGCTGGCCAGACCGTCAGCTCTCCTTAAATGGATTAGCGATCGAGTTGGCTAGTCTTTGACGTACACGGCCTCGGACGTGATAATGATCGTCCTGGCTGGAGCGTCTTTTTTGTAGACTATGCAGACGGATGGCTTCTAAATAAGAATGGTCGAGCGAGCTTAGCTATTAGGCAGTCTGCTGTTTGCCAAGGCAAGGCAAGGCTGGCGAACGCAAGGTTGAATTGTGGACCATGATCAGGG	Fungi	Basidiomycota	Agaricomycetes	Boletales	Boletaceae	Boletus	boletus	GQ900530	89	6e-127	97.73
OTU652	261_5505360|F|ITS2;size=143;	LT981173	CAACCCTCAGGCTCTTAGCTGGCCCGGCGTTGGGGTATCTGCGACGATCGCAGGCCCTGAAAGACAGTGGCGGTACCCGCTAGCACTCCGGGCGCAGTGGATTGATTTCTCGCCTAGGACGTCTAGCGGGCTTGCCGGCCGTAAAACGCCCTAATCTTCGGAA	Fungi	Ascomycota	Sordariomycetes	Sordariales	_	_	sordariales1	emb|LN911367.1	100	1.6e-68	96.32
OTU653	261_5522283|F|ITS2;size=6;	LT981043	AAGCTCCTCAACCACATCAATAATTTTAATGGGTGTGGCTTGGACTTGGGGGTTGCAGGCTTCTGTGGAAGTCTGCTCCCCTGAAATGTATTAGTGGTTATTGTGAGCCCAACCAACAGGTGTGTGATAAATATCTCTATGCCCTTTGGTTATGCTGTTGAAACCGCTTCGAAAAACAAACCCACATTTTGATGA	Fungi	Basidiomycota	Agaricomycetes	Agaricales	Inocybaceae	_	inocybe	JN129394	100	2e-59	88.27
OTU654	262_5530243|F|ITS2;size=290;	LT979863	AATTCTCAAAACCCCTTTCTTTGGTCTTTTGGTCGGGAAAAGGATTTTGGACTTGGAGGCCTTTTGCCGGCTTTGCCTCAAAGCCGGCTCCTCCCAAATGAATTAGTGGGGTCTGCTTTGCCGATCCTTGGCGTGATAAGTTGCTTCTACGTCTTGGGTTTTGGCACTGTGCGCCTGCTTCTAACCGTCTAATCGACAACGATGGTGTTCTGGTCACCGCCGATTCATCGGTGGGAGGCTTGACCCACAAAATGAA	Fungi	Basidiomycota	Agaricomycetes	Russulales	Russulaceae	Russula	russula-lactarius	UDB013128	100	7e-116	96.11
OTU655	262_5530256|F|ITS2;size=2819;	LT980515	CCATCCCTCAAGCTTCGCTTGGCTGGTTGGGCCAGCGTCCACCTGTGGCTCCCGCCATAGGGGGACGGGCCCAAAAGGCAGTGGCGGCTCCGGGGGACTTGGGTCCTCGGGGCGGTGATGCATGGGTCTCTTCATCCACCGTCCCCTGGGTCATGCCCCGGGAGTCTGTCGAACGATCGGTCTTCCCCTGTA	Fungi	Ascomycota	Eurotiomycetes	Eurotiales	Elaphomycetaceae	Elaphomyces	elaphomyces	emb|LN911295.1	100	1.92e-73	93.3
OTU656	262_5532599|F|ITS2;size=8;	LT979435	ACACCTCAACTCTCCACGGTTTGCCCGTGGTGAGCTTGGACTTTGGAGGTTTGCTGGCCCCACAGGTCGGCTCCTCTCAAATGGATCAGCTTGCCAGCGTTTGGTGGTGTCGCAGGTGTGATAAATATCTACGCTTGTGGCCGTCCGCCATGTAACCTTCAGCGATGGAGGTTCACTGGGGCTCATAGACGTCTCTCCTCGGTGAGGACAGCTTTGAAC	Fungi	Basidiomycota	Agaricomycetes	Thelephorales	Thelephoraceae	Thelephora	tomentella-thelephora	emb|LN911066.1	98.17	1.32e-90	95.35
OTU657	264_5575606|F|ITS2;size=11929;	LT979864	AATTCTCAAAACCCATTTCTTTTGGTCATTTTTGACCATGGAAAGGATTTTGGACTTGGAGGCCTTTTGCTGGTTTCACCTTGAAGCGAGCTCCTCCCAAATGTATTAGTGGGGTCTGCATTGTCGGTCCTTGGCGTGATAAGTTGTTTCTACGTCTTGGATCTTTTGGCGCTGTACACCTGCTTCTAACCGTCTCATTGACAACGATGGTGTTCCGGTCACCGCCGATTTATCGGTGGGAGGCTTGACCCACAAAACAAA	Fungi	Basidiomycota	Agaricomycetes	Russulales	Russulaceae	Russula	russula-lactarius	emb|LN829293.1	100	3.52e-121	97.34
OTU658	264_5587855|F|ITS2;size=25817;	LT978830	ACATCTCAACTCCTCACGGTTTGCCTGTGATGAGCTTGGACTTTGGGGGTCTTGCCGGCCTGTGGGTCGGCTCCTCTCAAACAAATCAGCTTGCCAGTGTTTGGTGGCGTCACAGGTGTGATAACTATCTACACTTGTGGTTTTCTGCCAGGTAACCTCCGGCAATGGGGGTTCACTGGAGCTCACAAATGTCTCTCCTCGGTGAGGACAGCTCTTTGAAC	Fungi	Basidiomycota	Agaricomycetes	Thelephorales	Thelephoraceae	Tomentella	tomentella-thelephora	AB848681	100	7e-100	96.38
OTU659	266_5631034|F|ITS2;size=4593;	LT979544	TACTCTCACACTCCCGATCTTTGGATTGGGAGCGGTGGACTTGGGTGTTGCTGCTTACCGTGGCTCACCTCAAATGAAGTCGTGCACCTCTTGGTTGGACATAGTACGGCGTGATAAGTGTCTTCGCCGGCGCCTCACTAGAGGGTGGCCGATCGGGAGCTCTGTGCTTCCAACCGTCCTCGGACAACAACTGACA	Fungi	Basidiomycota	Agaricomycetes	Sebacinales	Sebacinaceae	Sebacina	sebacina	JX630719	100	2e-89	96.94
OTU660	267_5657430|F|ITS2;size=153;	LT978831	ACACCTCAACTCTCATGGTCTGCCATGATGAGCTTGGATTTTGGGGGTCTTGCTGGCCTACAGTCAGCTCCCCTCAAATGAATTAGCTTTCCAGTGTTTGGTGGCATCACGGGTGTGATAAATATCTACACTTGTGGTTTTCTGCCAGGTAACCTTCAGTGATGGGGGTTCGCTGGGGCTCATAAACGTCTCTCCTTCAGCGAAGACAGCTTTGTGAAT	Fungi	Basidiomycota	Agaricomycetes	Thelephorales	Thelephoraceae	Tomentella	tomentella-thelephora	dbj|LC013835.1	100	7.6e-108	99.54
OTU661	268_5673645|F|ITS2;size=37;	LT978832	ACACCTCAACTCTCATGGCTTGCCGTGATGAGCTTGGACTTTGGGGGTCTTGTTGGCCTGTGAGCCAGCTCCCCTTAAATGAATTAGCTTGCCGGTGTTTGGTGGCGTCACAGGTGTGATAACTATCTACGCTTGTGGTTTCCCACCAGGTAACCTTCAGCAATGGAGGTTCACTGGAGCTCATAAATGTCTCTCCCCAGCGAGGACAGATTTTGACC	Fungi	Basidiomycota	Agaricomycetes	Thelephorales	Thelephoraceae	Tomentella	tomentella-thelephora	JX630406	100	7e-105	98.17
OTU662	268_5690557|F|ITS2;size=2364;	LT978833	ACACCTCAACTCTTCATGGTTTTCTGTGATGAGCTTGGACTTTGGGGGTTTTGCTGGCCTATGGTCGGCTCCTCTGAAATGAATCAGCTTGCCGGTGTTTGGTGGGCATCACAGGTGTGATAACTATCTACGCTTGTGGTTTTCCCACCGGGTAACCTTCAGCAGTGGAGGTTCGCTGGAGCTCACAGATGTCTCTCCTTGGTGAGGACGACCCTTTGAAT	Fungi	Basidiomycota	Agaricomycetes	Thelephorales	Thelephoraceae	Tomentella	tomentella-thelephora	gb|JQ991875.1	100	1.28e-100	97.29
OTU663	269_5696481|F|ITS2;size=219;	LT978834	ACACCTCAACTCTCATGGTTTGCCGTGATGAGCTTGGACTTTGGGGGTCTTGCTGGCCTGTGGTCAGCTCCTCTCAAATGAATCAGCTTTCCAGTGTTTGGTGGCATCACAGGTGTGATAAATATCTACACTTGCGGTTTCCTGCCAAGTAACCTTTCAGCAATGGAGGTTCGCTGGGGCTCATAAATGTCTCTCCTCAGTGAGGACAGCTTTGTGAAT	Fungi	Basidiomycota	Agaricomycetes	Thelephorales	Thelephoraceae	Tomentella	tomentella-thelephora	gb|JX030279.1	100	7.84e-98	96.8
OTU664	27_640941|F|ITS2;size=2741;	LT981111	AATTATCAAGCTAGATGGCTTTTGTTATCTTGGCTTGGTGTTTGGGCTTTGCCGTGTCCATCTACTGGAACGGCTGGTCTTAAAAGTATTAGCTTGACTCTCAATGTGGGTGCTGGTTCTACTCAGCGTGATAATATCTTGACCGCTGAGGACATCTTTTGGGATGGCCAGTCCTCGTTGGGGTTGCTTTCTAATCTGGAGTCGCGGGACCTTCTCATTGTTGAGGTTCTGTGTGCTGCTTTCAA	Fungi	Basidiomycota	Agaricomycetes	Cantharellales	Clavulinaceae	_	clavulina	dbj|AB854659.1	77.14	7.67e-44	84.97
OTU665	27_641202|F|ITS2;size=1898;	LT981146	AATTCTCAACCATGTCTTGATTGATTTCAAGGCCGTGGCTTGGAGTTTGGGGGTTTGCTGGCCTTCCTCTAGGTCGGCTCTCCTGAAATGTATTAGCGATCTGGCGAGCAATGGTCTGGAGTGTGGTGCAACGGCCTTTTCGACGTGATAATGATCGTCGTGGGGGCTGGAGCTTTTTGGACCTTGCATCAAAGCGAGTTCGCTTCCAACTCTCTCAATCGAATGGGTTTCATGTGGGAGTCATGCATGTGTTTTGTGTTGTGTACGCTACATGAGATTCTTTGATGATCGAAATAAA	Fungi	Basidiomycota	Agaricomycetes	Boletales	Boletaceae	_	boletus	GQ166869	83	1e-69	87.1
OTU666	27_641215|F|ITS2;size=17103;	LT978569	TATTCTCAACCGTGTCTTCTTTTTGAGGCATGGCTTGGAGGTTGGGGGTTGCTGGCTCTTGTCAGCTCCCCTGAAATACATTAGCGATGGACATGCATAATGCCTTCCGACGTGATAATGATCGTCGTGGGCTGGAGCAACCGATCCCTAGACATCTTAGTTACTAGTCTACTCGACGTAACACAAGGCTTCTTGGGCAAGGCCGTCCGCTCGCTTCGAAATCCCAGATGGGCCTTAGCTACTAGTCTGCACGACGAACGCAAGGGCATCACTTTGAAA	Fungi	Basidiomycota	Agaricomycetes	Boletales	Boletaceae	Xerocomus	boletus	AB848704	100	2e-106	91.99
OTU667	27_641463|F|ITS2;size=40;	LT979865	AATTCTCAAAACCCCTTCCTTTGCCGGAAAGGGTTTTGGACTTGGAGGCCTTTTGCTGGTTTCACCTTGAAACGAGCTCCTCCTAAATGGATTAGTGGGGTCTGCTTTGCTGATCCTTGACGTGATAAGATGCTTCTACGTCTCGGGTTTTGGCACTGTGCCTCTGCTTCTAACCGTCTCATTGACAATGATGGTGTCCCGGTCACCGCCGATTCCTCGGTGGGAGGCTTGACCCACAAAACGA	Fungi	Basidiomycota	Agaricomycetes	Russulales	Russulaceae	Russula	russula-lactarius	JF908661	100	6e-111	96.31
OTU668	27_646546|F|ITS2;size=22;	LT981129	GAGTCTCTCAAATGGGGTTTGTCACTCCTTTGGATTTTGGGTCTTGCTGTGAAATTCATCTCAGCTTACCTTGAAAGCATTAGCAAGCATTCTCTCAAGTCTTTTGTGATGAGGGCGTTCTAATTGGTCAAGGGACTGTAGCCAGTCTCAAAGACGTCTTTTTCATCATAAAAGTGACTTTAAAGTGACGCTAGCTTTCCAATCATCCCTATGGGATTGCGCATTGAGCTCCTTCAATGTTAAT	Fungi	Basidiomycota	Agaricomycetes	Cantharellales	Cantharellaceae	_	cantharellus	KM576333	89	1e-68	88.36
OTU669	27_648237|F|ITS2;size=6000;	LT981112	AATTATCAAGCTGTGGATGGCTTTTCGTTATCTTGGCTTGGTGTTTGGGCTCTGCCGTGTCCTCTACTGGAACGGCTGGCCTTAAAAGCATTAGCTGACTCTCAATGTGGGGACTGGTTCTACTCAGCGTGATAATATTTTGACCGCTGAGGACATCTTTCGAGATGGCCAGTCCTCATTTGGGGCTGCTTTCTAATCTGGAATCACGGATCCTCGTGTCTGTGTTGCCGCTTTCAA	Fungi	Basidiomycota	Agaricomycetes	Cantharellales	Clavulinaceae	_	clavulina	gb|EU862209.1	80.59	3.54e-47	85.71
OTU670	27_650618|F|ITS2;size=20623;	LT980251	AATTCTCAACCTCCTTGGTTTCTTCTGGGAGACCGATGGAGGCTTGGACATTGGAGGCCTTTTGCTGGTGTCTCTCTCTCTTGAAGGCCCAGCTCCTCTTAAATGAATTAGCGAGGTCCTCTTTGCCGATCCTCGACATGTGATAAGATGTTTCCGTGTCTTGGTCTCTGGCTCTGTTGCTTTTGGGACCCGCTTCTAATCGTCTCAACCTTGCATCGAGACAAACGTCTGAGCGTGTCTCCCTTCCCTGGGAAACACCCTCGACCTCACGAAC	Fungi	Basidiomycota	Agaricomycetes	Russulales	Russulaceae	Lactarius	russula-lactarius	gb|JQ991751.1	100	3.47e-131	97.84
OTU671	271_5740956|F|ITS2;size=17762;	LT978835	ACACCTCAACTCTCATGGTTTGCCATGATGAGCTTGGACTTTGGGGGTATTGCCGGCCTAACCGTCGGCTCCTCTCAAATCGATCAGCTTGCCAGTGTTTGGTGGCGTCACAGGTGTGATAACTATCTACGCTTGCTGTCTTCCATCAGGTTACCTTCAGTGATGAAGGTTCACTGGAGCTTACAGATGTCTCTCCTCAGGGAGGACAGCTTTTTGAAC	Fungi	Basidiomycota	Agaricomycetes	Thelephorales	Thelephoraceae	Tomentella	tomentella-thelephora	HE814174	100	4e-112	100
OTU672	273_5775560|F|ITS2;size=1352;	LT980364	AATTCTCAAACCACAAACTTTTGTTGTGGCTTGGATAGTTGGGTGTTGCTAGCTTTTTATTGTAGGCTCACCTTAAATACATAAGTGGTGCATTTAGAAACTTGTTAGGTGTTTGTAAATTATCAATACATCTATGTTTCTCTGAATATACTGCTTCTAACAACCCTCATTTGATGA	Fungi	Basidiomycota	Agaricomycetes	Agaricales	Inocybaceae	Inocybe	inocybe	gb|KJ008846.1	100	3.99e-71	94.97
OTU673	273_5775609|F|ITS2;size=577;	LT981250	AAATCCTCACGCCCCTCTGCAGTATGGGCTTGGATTTGGGAGGGTTTTTGCAGGCTTTGTCGTCTGCTCTCCTGAAAAGCATTAGCGGTGTCTGAAACGGAAACCGTCAGAGGACGTGATAAATGTCTGTGTCCTTGGTATGCCGTGATTGAAAGCTGCTTCCTAACCTTTTGGAATTTGAAAA	Fungi	Basidiomycota	Agaricomycetes	Agaricales	_	_	inocybe	FJ827200	78.26	2e-34	84
OTU674	273_5775958|F|ITS2;size=168;	LT981251	AATTCTCAACCATATCAATTAGCTTTGATATTGGCTTGGATTGTGGGGGTTGCTGGTGACAACATTGTCGGCTCCCCTTAAATGCATTAGCTGGTGTTTTCTCCCTTGCTTATTGGTGTGATAATTATCTACGCCATGCTGTGGGTGACTTTAACGCTGCTTCTAACCGTCTGTTTATTCAGACAATACATGACA	Fungi	Basidiomycota	Agaricomycetes	Agaricales	_	_	hebeloma-alnicola	JF273526	100	2e-31	80.19
OTU675	273_5782127|F|ITS2;size=200;	LT979545	GTACTCTCACACTTCTCATCCTTTGGATTTGGAGCGGTGGACTTGGGTGTTGCCGCTTTACGGTGGCTCACCTCTAATGCATTCGTGCAACTCTTGGTTGGACATAGTACGGCGTGATAAGTGTCTTCGCCGGCACCTCGCAAGAGGGTGGCTGATTGAGAGCTCTGTGCTTTCAAACCGTCCTTGGACAATGACTGACA	Fungi	Basidiomycota	Agaricomycetes	Sebacinales	Sebacinaceae	Sebacina	sebacina	gb|KR019822.1	100	5.96e-99	100
OTU676	273_5788081|F|ITS2;size=3;	LT980456	AATTCTCAACCTTATCAGTTTATTTCTGATAGTGGCTTGGATGGTGGGGGTGCTGGCCTCGTCAGCTCCCCTTAAATGCATTAGCTGGTGCCCTGTGTGGACTTGTCTATTGGTGTGATAATTATCTACGCCATGGATGTCTGCAATCACACCGCTTCTAACCGTCTGTTAAATCGGACAATACATGACA	Fungi	Basidiomycota	Agaricomycetes	Agaricales	Hebelomataceae	Hymenogaster	hebeloma-alnicola	gb|KM588770.1	77.37	1.49e-45	90.2
OTU677	274_5799401|F|ITS2;size=1164;	LT978589	AATCCCTCAACCCCTCAGGGGGCTTGGACTTTTGGAGCGTGCTGGTGGTGATCGTCGGCTCCTCTTTAAATGCATCAGCGGAACCCTCGTTCCCCGTTTCGGCGTGATAGATCTATGTTGCGCCACGTAGGGGGGTGGTCAAGTGGTTTTTCCGCTTCCAATCGTCCTCGGACAAAAGATTGTTGACAA	Fungi	Basidiomycota	Agaricomycetes	Atheliales	Atheliaceae	Tylospora	amphinema-tylospora	gb|JQ991913.1	100	7.82e-88	98.41
OTU678	274_5800869|F|ITS2;size=3;	LT978590	AATCCCTCAACCCCTCAGGGGGCTTGGACTTTTGGAGCGTGCTGGTGGTGATCGTCGGCTCCTCTTTAAATGCATCAGCGGAACCCTCGTTCCCCGTTTCGGCGTGATAGATCTATGTTGCGCCACGTAGGGGGGTGGTCAAGTGGTTTTTCCGCTTCCAATCGTCCTCGGACAAACACCGAATCTG	Fungi	Basidiomycota	Agaricomycetes	Atheliales	Atheliaceae	Tylospora	amphinema-tylospora	gb|JQ991913.1	94.12	2.83e-82	98.86
OTU679	274_5801120|F|ITS2;size=10;	LT979866	ACATCCTTCAACCTTTCTTGGTTTCTCAATCAAGAAAGGCTTGGACTTTGGAGGTTTTAATTGCTGGCCTCTCTTGAAGTCAGCTCCTCTTAAATGGATTAGTGGGGTCTGCTTTGCCGATCCTTGACGTGATAAGATGTTTCTACGTCTTGGGTTTTGCACTCCCTGCTTCTAATCGTCTTGCATTCAGGACAGAGTCATGAA	Fungi	Basidiomycota	Agaricomycetes	Russulales	Russulaceae	Russula	russula-lactarius	AB451977	100	3e-83	93.75
OTU680	274_5801351|F|ITS2;size=13;	LT980864	AATCCTCAACCCCGTCCGTCGGTCGGGGCTTGGACTTTGGAGTGTGCTGGCGAAGGTCGGCTCCTCTTTAAATGCATCAGCGGAGAAAAACAAACCTTTTTTCCCCCTTCAGCGTGATAACTGTGTTGCGCTGTGGTCGCGAAAGGGTCCGCTCATAATTGTCCTCAGACAAACACCGAATCTG	Fungi	Basidiomycota	Agaricomycetes	Atheliales	Atheliaceae	Amphinema	amphinema-tylospora	gb|KC179047.1	100	1.09e-86	98.91
OTU681	274_5803940|F|ITS2;size=3;	LT978836	ACACCTCAACTCTCATGGCTTGCCATGATGAGCTTGGACTTTGGGGGTTTTGCTGGCCCTGTGGTCAGCTCCTCCTAAATGCATCAGCTTGCCAGTGTTTGGTGGCATCACGGGTGTGATAACATCTACGCTTGTGGTTGCCTGCCAAGTAACCTTCAGCGATGAAGGTTTGCTGGGGCTCATAAATGTCTCTCCCCAGTGAGGATGACTTCTTGAAT	Fungi	Basidiomycota	Agaricomycetes	Thelephorales	Thelephoraceae	Tomentella	tomentella-thelephora	gb|GU220650.1	92.66	1.1e-76	93.1
OTU682	28_659757|F|ITS2;size=312;	LT979546	GTACTCTCACACTCTCCGATTTGGGGAGCGGTGGACTTGGGTGCTTGCTGCTTTCCTTGTGGCTCACCTTAAATGCATCAGTGCATCTCTTGGTTGGACATAGTACGGCGTGATAAGTGTCTTCGCCGGCGCCTCATAAGAGGGTGGCCAACTGGGGCTCTGTGCTTTCAAACCGTCTTCGGACAATATCTGACA	Fungi	Basidiomycota	Agaricomycetes	Sebacinales	Sebacinaceae	Sebacina	sebacina	gb|KM576576.1	91.28	2.22e-73	95.53
OTU683	28_660642|F|ITS2;size=15640;	LT979547	GTACTCTCACACTTTGGATCCTTTGGATTTGGAGCGGTGGACTTGGGTGTTGCTGCTTTGCGGCGGCTCACCCCAAATGCATGCGTGCAACTCCTGGTTGGACATAGTACGGCGTGATAAGTGTCTTCGCCGGCACCTCGCGAGAGGGTGGCTGATCGGGAGCTCTGTGCTTTCGAACCGTCCTTGGTGGACAATGACTGACA	Fungi	Basidiomycota	Agaricomycetes	Sebacinales	Sebacinaceae	Sebacina	sebacina	gb|JF273541.1	100	7.82e-88	96.55
OTU684	28_670342|F|ITS2;size=2098;	LT979867	AATCATCAAAAATCTTTCCTTGTTTTTACAAGGAAGGGTTTTTGGACTTGGAGGTCTAATGCTTGCCTTTCACTTTGGAAGGTGAGCTCCTCTCAAATGAATTAGTGAGGTCTGCTTTGCTGGTCCTTGACGTGATAAGATGTTTCTACGTTTTGGATTTGGCACCGTCTCTCGCTTCCAACTGTCCTGCTTGGACAAAAGATGGTGCTTTGGTCCTCACTCGTCTATGTTGGCGGGGGGAGGGCTGGACCCACAAAAGAAAA	Fungi	Basidiomycota	Agaricomycetes	Russulales	Russulaceae	Russula	russula-lactarius	gb|GQ240917.1	100	3.6e-106	93.38
OTU685	28_674766|F|ITS2;size=14762;	LT980252	AAATCTCAACCTTCTCGGTTTTCTTCTGGACACTGAAGGAGGCTTGGACTTTGGAGGCCTTTGCTGGCATCTCTCTCTTTTTGAGAGCCAGCTCCTCTTAAATGAATTAGCAGGGTCCTCTTTGCCGATCCTCGACATGTGATAAGATGTTTCCATGACTTGGTTTCTGGCTCTGTTGCCTTTGGGACCTGCTTCTAACCGTCTCAAATGAGACAACGGTTTGGGTGTGTCTCCCTCCTCGGGGAAACACTCTCAACCCCACTGAC	Fungi	Basidiomycota	Agaricomycetes	Russulales	Russulaceae	Lactarius	russula-lactarius	JX852629	100	4e-138	100
OTU686	28_677036|F|ITS2;size=8068;	LT978837	ACACCTCAACTCTCATGGTTTGCCATGATGAGCTTGGACTTTGGGGGTTCTGCTGGCCCATGGTCAGCTCCCCTTAAATGGATCAGCTTGCCAGTGTTTTGGTGGGATCCCAGGTGTGATAACTATCTACGCTTGTGGCTTCCTGTCGAGCAACCTTCAGCGATGAGGGTTCGCTGGGGCTCATAAACGTCTCTCTTGTGGAGACAGGTTTTTGAA	Fungi	Basidiomycota	Agaricomycetes	Thelephorales	Thelephoraceae	Tomentella	tomentella-thelephora	gb|EF644151.1	100	1.66e-99	97.69
OTU687	29_697158|F|ITS2;size=1597;	LT979868	ACACCCTCAACCTTCTTGGTTTCTTGACCGGGAAGGCTTGGACTTTGGAGGTTGTCTTTGCTGGCCTCTCTTTGAAGCCAGCTCCTCCTAAATGAATTAGTGGGGTCCGCTTTGCCGATCCTTGACGTGATAAGTATCCTTCTACGTCTTGGGTTTTGCACTGTTGCCCTGGAACCCGCTTCCAACGGTCTTCGTTTCGAAGACGATGTTCGAGTTGCATTGTGACTCGACCTCAACGA	Fungi	Basidiomycota	Agaricomycetes	Russulales	Russulaceae	Russula	russula-lactarius	dbj|AB509481.1	98.74	2.2e-93	93.64
OTU688	29_697181|F|ITS2;size=21;	LT978838	ACACCTCAACTCTCATGGCTTGCCATGATGAGCTTGGACCTTGGGGGTCTTGCTGGCGTATACAGGTCAGCTCCCCTCAAATGAATCAGCTTGCCGGTGTTTGGTGGCGTCACAGGTGTGATAAATATCTACGCTTGTGGCTTTCCACCACGTAACCTTCAGCAATGGAGGTTCACTGGAGCTCATAAATGTCTCTCCTTGGTGAGGACAGATTTTGACC	Fungi	Basidiomycota	Agaricomycetes	Thelephorales	Thelephoraceae	Tomentella	tomentella-thelephora	gb|JX625335.1	99.09	1.04e-81	92.69
OTU689	29_698350|F|ITS2;size=879;	LT981174	CAACCCTCAGGCCCCTAGCTGGTCTGGCGTTGGGGCATCTGCGGCGACCCGCAGGCCCTGAAAGACAGTGGCGGTACCCACTAGCACTCCGGGCGCAGTAGATGTATTTCTCGCCTAGGATGTCTAGCGGGTTGGCCGGCCATAAAACTCCCTAATCTTCGGAA	Fungi	Ascomycota	Sordariomycetes	Sordariales	_	_	sordariales1	LN910597	100	5e-79	100
OTU690	29_700773|F|ITS2;size=62;	LT980570	ATATATCTATCAACCCACTCTTTGTTGAGTGGTTTGGATGTGGGGGTTTGCTGGCCTCTTTAATGGTTCAGCTCCCCTGAAATGCATTAGCAGAACAACCCTGTTCATTGGTGTGATAACTATCTACGCTATTGAATGTGAAGGGAATTTCAGCTTTCTAACTGTCTTTGGACAATTAATCATTA	Fungi	Basidiomycota	Agaricomycetes	Agaricales	Cortinariaceae	Cortinarius	cortinarius	gb|KJ792527.1	100	1.4e-90	100
OTU691	29_702496|F|ITS2;size=473;	LT980764	AAATTCTCAAAGTAAATATTTTGTTAATTCAATTTGTTTACTTTGGATTTTGGAGGCTTTGCAGATTTTACAATCTGCTCCTCTTAAATGTATTAGCTGGATCTCAGTATATACTTGGTTCCACTTGGCGTGATAAGTATCACTCGCTGAGGATCCACCCATAAAAAGGTGGCCAACGAATACGGATGAACTGCTTCTAATAGTCTATTAAATTAGACAATTAATTAATTTCAAG	Fungi	Basidiomycota	Agaricomycetes	Cantharellales	Ceratobasidiaceae	Ceratobasidium	ceratobasidium1	dbj|AB972825.1	96.17	5.38e-100	96.48
OTU692	29_702671|F|ITS2;size=425;	LT980457	AATTCTCAACCATTTATTTGGCTTGGATGTGGGGGCTGGCTGGCTTCTTTGAGGTCAGCTCCCCTTAAATGCATTAGCTGGTGACCTGTGTGGACTTGTCTATTGGTGTGATAATTATCTACGCCGTGGATGTCTGCAATCATAGCACTGCTTCTAACCGTCTGTTCATTCGGACAATACATGACA	Fungi	Basidiomycota	Agaricomycetes	Agaricales	Hebelomataceae	Hymenogaster	hebeloma-alnicola	FJ454914	90	4e-62	92.49
OTU693	3_53819|F|ITS2;size=2647;	LT978839	ATACCTCAACTCTCATGCTTTGCCATGATGAGCTTGGAATTTTGGGGGTTTTGCTGGCCTGTGGTCAGCTCCTCTCAAATGAATCAGCTTGCCAGTGTTTGGTGACATCATGGGTGTGATAAATATCTACATCTGTGGTTGCCTGCCAGATGACATCCAGCAATGGAGGTTCACTGGGGCTTATAAGTGTCTCTCCTCAGCGAGGACAGCATTTTGAA	Fungi	Basidiomycota	Agaricomycetes	Thelephorales	Thelephoraceae	Tomentella	tomentella-thelephora	ref|NR_121287.1	100	5.98e-109	100
OTU694	3_53839|F|ITS2;size=23114;	LT980883	ACATCTCAATACCTGTCTGCTTTTGATGGGTATTGGAAATTGGGGGTTGCAGGGCTTGTATAGCTTTGCTCTCCTTGAATGTATTAGTGGAGAAAAAGAAAGCTCATTGAACTCCATTGGTGTGATAAAATCTATCAATGCCAGGAACAATGTCCAAGTTTCTCTGCTGTCTAATCCATGTCCAGTTTGGACCTCATTTGACCA	Fungi	Basidiomycota	Agaricomycetes	Agaricales	Amanitaceae	Amanita	amanita	KJ466376	100	9e-104	100
OTU695	3_54224|F|ITS2;size=101733;	LT979759	AAACCTCGGATCGATGCTTCGACCCCGTCGAAGCTCGGTTCGGACTGTGGGAGTCTGCCGGCGAAGCGTGACTTCGTCGGCTCTCCTCAAAAGCATTAGCTGTGGGTGGCGAGCCTGGCATGGCACGGCCTGTTCGACGTCGTAGTGATCGTCGCGGGCTGGAAGTGTACGGCTCGACGTGACCCATGCTTCTCGAGTCTTGCGAGCCCGTCCCTCCGTGGGACGGCCGCGCCCCATCGAA	Fungi	Basidiomycota	Agaricomycetes	Boletales	Sclerodermataceae	Scleroderma	pisolithus-scleroderma	JX434679	100	3e-124	100
OTU696	3_70242|F|ITS2;size=20725;	LT980571	ATATATATCAACCTCTTCAGCTTTTTGCATGTTGAGTTGTTGGATGTGGGGGTTATTTTTTGCTGGACTTCTTGAGAAATCTGAGTTCAGCTCCCCTAAAATACATTAGCGAAACAATTTGTTTACTGCTCATTGGTGTGATAACTATCTACGCTATTGACAGGGGGCATGTTTAGCTTCTAACAGTCCATTTAACTTGGACAATTTCTTATTA	Fungi	Basidiomycota	Agaricomycetes	Agaricales	Cortinariaceae	Cortinarius	cortinarius	HE814226	100	3e-104	98.6
OTU697	3_75834|F|ITS2;size=1944;	LT978840	ACACCTCAACTCTCATGGTTTGCCATGATGAGCTTGGACTCTGGGGGTTTTGCTGGCCTGCGGTCAGCTCCCCTCAAATGGATCAGCCTCCCAGTGTTTGGTGGCATCACAGGTGTGATAACTATCTACGCTTGCGATTGCCTGCCAGGTAACCTTTGGCAACAAAGGTTCGCTGGGGCTCACAAACGTCTCTCCTCAGTAGAGACAACTTTTTGAAC	Fungi	Basidiomycota	Agaricomycetes	Thelephorales	Thelephoraceae	Tomentella	tomentella-thelephora	emb|HG425996.1	100	6.59e-79	91.78
OTU698	3_77168|F|ITS2;size=692;	LT979760	AAACCTCGGATCGACGCTTCGACCCCGTCGAAGCTCGGTTCGGACTGTGGGAGTCTGCCGGCGAAGCGTGACTTCGTCGGCTCTCCTCAAAAGCATTAGCTGTGGGTGGCGAGCCTGGCATGGCACGGCCTGTTCGACGTCGTAGTGATCGTCGCGGGCTGGAAGTGGGTGGCTCGAGGGGCCCCATGCTTCTCGAGTCTTGCGAGCCCGTCCCTCTGTGGGACGGCCGCGCCCCATCGAA	Fungi	Basidiomycota	Agaricomycetes	Boletales	Sclerodermataceae	Scleroderma	pisolithus-scleroderma	KC152225	100	6e-116	97.93
OTU699	30_704601|F|ITS2;size=3189;	LT980846	AATTCTCAACCAATGTCTTCATTGACTTGGCTTGGAGTTGGGGGTTTGCTGGCGGGTTCTGTCGTCAGCTCTCCTGAAATGCATTAGTGATCAGTTATTGGGCGTGCACGGCCTTTCGACGTGATAATGATCGTCGAGGGCTGGAGCGTCCAGATTGCTTTACTCTACTACGTCACGTCTTGCTTTCGTTATTAGCTGGTCACAAAGACTCGGCGAACACCAAAGTGTAGAGTAGACTTTTGAA	Fungi	Basidiomycota	Agaricomycetes	Boletales	Boletaceae	Aureoboletus	boletus	AB973720	62	3e-54	91.77
OTU700	30_708464|F|ITS2;size=9361;	LT978609	CAAACCCGCTCATACATATTATGGTACTGATGGAAGTGGACTCTGGTTACTCATGATGTATCCCAATCACCCCATTGAAATATATAGGCAGGACATTAAACCTCTGCAATGGACTTAGTAACTGTTGTGAAAACATAGACCAGTCTTTTGCCTGGTTCCAGCCTGGCCTCGATGGACCTCCATCCAAGATAAACTCTG	Fungi	Ascomycota	Pezizomycetes	Pezizales	Tuberaceae	Tuber	tuber-helvella	FJ797879	100	4e-87	95.96
OTU701	30_711284|F|ITS2;size=12784;	LT978591	AATCCTCAACCCCCTCCGATTTGTTTCGGTGGGGATTGGACTTGGAGCGTGCTGGCGAAGGTCGGCTCCTCTTTAAATGCATCAGCGGAGAAAATGCCTTTTGCGCCTCTGGCCGTTCAGCGTGATAATGACGTTGCGCTGCGGTCGAGCTCAAGGTCCGCTTCCAAAGGTCCTCGGACGAACGTAAACATGAC	Fungi	Basidiomycota	Agaricomycetes	Atheliales	Atheliaceae	Tylospora	amphinema-tylospora	gb|KJ769324.1	93.3	1.69e-84	98.9
OTU702	30_718063|F|ITS2;size=53;	LT979436	ACACCTCAACTCTCATGGGTTTGCCATGATGAGCTTGGACTTTTGGGGGTTTTGCTGGCCCATTGTCAGCTCCTCTCAAACGAATCAGCTTGCCGGCATTTGGTGGCATCGCAGGTGTGATAACTATCTACGCTTGTGGTATTCCACCTGGTAACCTTCAGCAATGGAGGTGTGCTGGAGCTCATAGACGTCTCTCTTCAGCAAGGGACATGTTTTTGAAT	Fungi	Basidiomycota	Agaricomycetes	Thelephorales	Thelephoraceae	Thelephora	tomentella-thelephora	UDB014187	100	2e-101	96.83
OTU703	30_718853|F|ITS2;size=31;	LT978841	ACACCTCAACTCTTCATGGTTTTCCGTGATGAGCTTGGACTTTGGGGGTTTTGCTGGCCTATGGTCGGCTCCTCTGAAATGAATCAGCTTGCCAGTGTTTGGTGGGCATCACAGGTGTGATAACTATCTACGCTTGTGGTTTTCCACCAGGTAACCTTCAGCAGTGGAGGTTCACTGGAGCTCACAGATGTCTCTCCTCAGTGAGGACGACCCATTGAAT	Fungi	Basidiomycota	Agaricomycetes	Thelephorales	Thelephoraceae	Tomentella	tomentella-thelephora	JX630829	100	1e-102	97.29
OTU704	30_718930|F|ITS2;size=4112;	LT979869	ATACTTTCAACCTTCTTGGTTTGTTTTGACCAAGAAGGCTTGGACTTTGGAGGTTTTTCTTGCTGGTCTCTTTTGAAACCAGCTCCTCCTAAATGAATGTGTGGGGTCCGGTTTGCTGATCCTTGACGTGATAAGCATATTTTCTACGTCTCTCAGCTCGGAACTCGCATGACTCAACCTTTATACAAA	Fungi	Basidiomycota	Agaricomycetes	Russulales	Russulaceae	Russula	russula-lactarius	AF418609	89	2e-60	91.72
OTU705	30_719523|F|ITS2;size=229;	LT979870	AATTCTCAAACCTTCTTGGTTTCTTGACTGAGATGGCTTTGGACTTTGGAGGTGTTTTGCTGGCTTTGCAGAAAGTCGGCTCCTCTTAAATGCATTAGTGGGGTCCCCTTTGCCAATCCCCAGGCGTGATAAGATGTTTCTACGTCTTGGGATTTGCTCTGTTCGTCGGGAACCTGCTTCCAACCGTCTCGTGAGAGACATCGTTCGAGTTTGCTCGGCACACGAA	Fungi	Basidiomycota	Agaricomycetes	Russulales	Russulaceae	Russula	russula-lactarius	AB831846	100	3e-104	96.9
OTU706	30_720960|F|ITS2;size=154;	LT979871	AATTCTCAAACCTTCTTGGTTATTATGACCAAGATGGCTTTGGACTTTGGAGGTCTTTTGCTGGCTTTGCGAAAAGTCGGCTCCTCTTAAATGCATTAGTGGGGTCCTCTTTGCTGATCCTCAGGCGTTGATAAGATGTTTCTACGTCTTGGGATTTGCTCTGATTAATGAGAACCCGCTTCTAACCGTCTCACTATAAGGAGACATCGTTCGAGTTTTACTCGACCCACGAA	Fungi	Basidiomycota	Agaricomycetes	Russulales	Russulaceae	Russula	russula-lactarius	GQ268650	100	5e-112	97.85
OTU707	30_722824|F|ITS2;size=1200;	LT980253	AAATCTCAACCTCCTCGGTTTCTTCTGGACGCCGAAGGAGGCTTGGACTTTGGAGGGCTTTGCTGGACTTTCGAGTCCAGCTCCTCTCAAATGAATTAGCGAGGTCCCCTTTGCCGATCCTCGACGTGTGATAAGATGCTTCCACGTCTCGGTCGTCGGCTCTGTCACCTCTCGGGACCTGCTTCCAATCGTCTCTTGACGAGACAACGTTCGAGCTTGCCTCGACCACGTAC	Fungi	Basidiomycota	Agaricomycetes	Russulales	Russulaceae	Lactarius	russula-lactarius	AB509711	100	5e-117	99.14
OTU708	30_723292|F|ITS2;size=2566;	LT978842	ACACCTCAACTCTCATGGTTTGCCGTGATGAGCTTGGACTTTGGGGGTTTTGCTGGCCGTGCGGTTGGCTCCTCTCAAATAGATCAGCTCGCCAGCGTTTGGTGGCTTCACGGGTGTGATAACTGTCTACGCCTGTGGTCCATCGGGTGACCTTCAGCGATGGAGGTTTGCTGGAGCTTACAAATGTCTCTCCTCGGCAGAGACGGCTTTTCGAAC	Fungi	Basidiomycota	Agaricomycetes	Thelephorales	Thelephoraceae	Tomentella	tomentella-thelephora	gb|JQ393137.1	89.81	9.64e-63	89.9
OTU709	30_725241|F|ITS2;size=303;	LT978843	ACACCTCAACTCTCACGGTTTGCCGTGATGAGCTTGGACTTTGGAGGTCTTGCCGGCCTGTGGTTGGCTCCTCTCAAATGAATCAGCTTGCCAGTGTTTGGTGGCATCCCAGGTGTGATAACTATCTACGCTTGTGGCTTTCCACCAGGTAACCTTCAGCGATGGAGGTTCGCTGGGGCTCACAAATGTCTCTCCTAAGTGAGGACGGCTTCTTGAAT	Fungi	Basidiomycota	Agaricomycetes	Thelephorales	Thelephoraceae	Tomentella	tomentella-thelephora	gb|FJ553031.1	100	5.87e-109	100
OTU710	30_726223|F|ITS2;size=1048;	LT979872	AATTCTCAAACCTTCTTGGTTTCTATGACCAAGATGGCTTTGGACTTTGGAGGTCTTTTGCCGGCTTTGCGAAAAGTCGGCTCCTCTTAAATGCATTAGTGGGGTCCTCTTTGCCGATCCCCAGGCGTTGATAAGATGCTTCTACGTCTTGGGATTCGCTCTGTTCATCAGGGAACCCACTTCTAACCGTCTCACGATAAGGAGACATCGTTCGAGCTTCGCTCGACCCTACGAA	Fungi	Basidiomycota	Agaricomycetes	Russulales	Russulaceae	Russula	russula-lactarius	gb|KM576559.1	100	4.75e-90	93.19
OTU711	30_726492|F|ITS2;size=491;	LT981175	CAACCCTCAGGCTCTTAGCTGGCCCGGCGTTGGGGTATCTGCGACAATCGCAGGCCTTGAAAGACAGTGGCGGTACCCGCTAGCACTCCGGGCGCAGTGGATTAATTTCTCGCCTAGGACGTCTAGCGGGTTTACCGGCCGTAAAACACCTTAATCTTCGGAA	Fungi	Ascomycota	Sordariomycetes	Sordariales	_	_	sordariales1	emb|LN911367.1	100	1.63e-58	92.64
OTU712	301_16306|F|ITS2;size=676;	LT980572	ATATATCAACTCTCTTCAGCTTTTTTGCATGTTGAGTTGTTGGATGTGGGGGATATTATTTGCTGGACTCTCTTGAGGTCAGCTCCCCTCAAAAACATTAGCAAAACAATTTGTTTACTGCTCATTGGTGTGATAATTATCTACGCTATTGACAGTAAAGCACAGTTTAGCTTCTTAACAGTCCATTGACTTGGACAATCTTTTTTATCAA	Fungi	Basidiomycota	Agaricomycetes	Agaricales	Cortinariaceae	Cortinarius	cortinarius	HE814128	100	3e-99	97.64
OTU713	301_16421|F|ITS2;size=25894;	LT979437	ACACCTCAACTCTCTACGGTTTGCCGTGGTGAGCTTGGACTTTGGAGGCTTGCTGGCCCACGGTCGGCTCCTCTCAAATGAATCAGCTTCCCAGTGTTTGGTGGCGTCATGGGTGTGATAACTATCTACGCTCGCGGCAGCCTGCCTCGTAACCTTCGGAGACGGAGGTTCGCTGGAGCTCAAAAACGTCTCTCCTCAGCGAAGACAGCTTTTTTAAC	Fungi	Basidiomycota	Agaricomycetes	Thelephorales	Thelephoraceae	Thelephora	tomentella-thelephora	gb|JQ991848.1	97.25	6.19e-84	93.9
OTU714	301_16425|F|ITS2;size=26684;	LT979438	ACACCTCAACTCTCCACGGTTTTCCCGTGGTGAGCTTGGACTTTGGAGGTTTGCTGGCCCCAGGGGTCTGCTCCTCTTAAATGAATCAGCTTGCCAGTGTTTGGTGGCGTCACAGGTGTGATAAATATCTACGCTTGCCGCCGTCCGCCATGCAACCTTCAGCGATGGAGGTTCGCTGGAGCTTAAAAACGTCTCTCCTCAGCGAAGACAGCTTTTTTAAC	Fungi	Basidiomycota	Agaricomycetes	Thelephorales	Thelephoraceae	Thelephora	tomentella-thelephora	emb|LN910770.1	100	1.01e-96	96.38
OTU715	301_16555|F|ITS2;size=10271;	LT978844	ACACCTCAACTCTCATGGTTTGCCATGATGAGCTTGGACTCTGGGGGATTTGCTGGCCCTGCGGTTGGCTCCCCTCAAACAAATCAGCTTTCCAGTGTTTGGTGGCATCACGGGTGTGATAAATATCTACGCTTGTGGTTTCCTGCCAGGTAACCTTCAGTAATGGGGGTTCGCTGGGGCTCATAAACGTCTCTCCTCAGTGAAGACAGCTTTGTGAAC	Fungi	Basidiomycota	Agaricomycetes	Thelephorales	Thelephoraceae	Tomentella	tomentella-thelephora	emb|LN909862.1	99.54	1.07e-96	96.79
OTU716	301_16823|F|ITS2;size=6641;	LT980970	AATTCTCAAAACCCTTTCTTTAAAGGATTTTGGACCTGGAGGTTTTGATGCTCGCTTTCGCGTCTTGAAAGCGAGCTCCTCTTAAACGAATTAGTGGGGTCTGCTTTGTTCGGTCCTTGACGTGATAAGATGTTTTAACGTTTTGGACTTGGCACTGTCGCTCGGACACCTGCTTCCAACCGTCCATGCTGTGGACAACGATGGTGCTTCGGTCTTCTTTGTCCATATCGGCAGAAGGCTGGACCCACAGAAAGAAAA	Fungi	Basidiomycota	Agaricomycetes	Russulales	Russulaceae	_	russula-lactarius	EF619753	52	1e-33	86.86
OTU717	301_17199|F|ITS2;size=1195;	LT978845	ACATCTCAACTCCTCACGGTTTTCCTGTGATGAGCTTGGATTTTGGGGGTCTTGCTGGCCTGCAGGTCGGCTCCTCTCAAACAAATCAGCTTGCCGGTGTTTGGCAGCATCACGGGTGTGATAACTATCTACGCTTGTGGTTTTCTGCCAGGTAACTTCCAGCAATGGGGGTTCACTGGAGCTCACAAATGTCTCTCCTCAGTGAGGACGGCTCTTTGAAC	Fungi	Basidiomycota	Agaricomycetes	Thelephorales	Thelephoraceae	Tomentella	tomentella-thelephora	gb|HQ204736.1	99.55	2.34e-88	94.09
OTU718	301_17210|F|ITS2;size=9575;	LT979873	AATCATCAAAAACCTTTTTCTTTTGACCTTCTTTGGTCGGGAAACGGATTTTTGGACTTGGAGGTTCCATGCTTGCTTTCAAGCCTTTGAAAGCGAGCTCCTCTCAAATGAATTAGTGGGGTCCGCTTTGCTGATCCTTGACGTGATAAAGATGCTTCTACGTTTTGGATTTAGCACTGTCCCTTTGGACGCCTGCTCCCAACTGTCCCTTGGACGATGATGGTGCTCCGGTCGCCGCCATTTACATTGGCGTAGAGGCTGGACCCACGAGAAAAAA	Fungi	Basidiomycota	Agaricomycetes	Russulales	Russulaceae	Russula	russula-lactarius	gb|JQ991820.1	100	9.52e-142	100
OTU719	301_17776|F|ITS2;size=66636;	LT978846	ACACCTCAACTCTCATGGTTTACCATGATGGGCTTGGACTTTGGAGGTCTTGCTGGCCAGTGGGCCAGCTCCTCTCAAATGAATTGGCTTGCCAGTGTTTGGTGGCATCACGGGTGTGATAACTATCTACGCTTGTGGTTTTCCACCAGGTAACCTCCAGTGATGGAGGTTCGCTGGAGCTCACAAATGTCTCTCCTTGCGAGGACGATTTCTGAAC	Fungi	Basidiomycota	Agaricomycetes	Thelephorales	Thelephoraceae	Tomentella	tomentella-thelephora	gb|JQ711963.1	99.54	2.24e-78	91.82
OTU720	301_17954|F|ITS2;size=8632;	LT979874	AATCATCAAACACCTTTTTCTGTTTACCGAAAAAGGTTTTTGGACTTGGAGGTTCAATGCTCGCCTTTCACTTTTGAAAAGCGAGCTCCTCTCAAATGAATTAGTGGGGTTCTCTTTGCCGATCCTCGACGTGATAAGATGTTTCTACGTTTTGGATTTGGCACTGACGCCTGCTTCTAACTGTCCCCACGGACAACGATGGTGCTCTGGTCGCCACCGTCTACATTGGCGGAGGAGGGCTGGACCCACAAAAGAAAA	Fungi	Basidiomycota	Agaricomycetes	Russulales	Russulaceae	Russula	russula-lactarius	gb|JQ991802.1	100	6.02e-104	93.51
OTU721	301_18374|F|ITS2;size=25544;	LT978847	ACACCTCAACTCTCATGGTTTACCATGATGAGCTTGGACTTTGGAGGTCTTGCTGGCTGGTGGCCAGCTCCTCTCAAATGAATCAGCTTGCCAGTGTTTGGTGGCATCATGGGTGTGATAACTATCTACGCTTGTGGTTTTTCACCAGGTAACCTCCAGTGATGGAGGTTCGCTGGAGCTCACAAACGTCTCTCCCTGTGAGGACAATTTCTGAAC	Fungi	Basidiomycota	Agaricomycetes	Thelephorales	Thelephoraceae	Tomentella	tomentella-thelephora	gb|JQ711963.1	99.54	1.73e-79	92.2
OTU722	301_18383|F|ITS2;size=10491;	LT978848	ACACCTCAACTCTTCATGGTTTTCTGTGATGAGCTTGGACTTTGGGGGTTTTGCTGGCCTATGGCCGGCTCCTCTAAAATGAATCAGCTTTCCAGTGTTTGGTGGGCGTCACAGGTGTGATAACTATCTACGCTTGTGGTTTTCCCACCAGGTAACCTTCAGCAGTGAAGGTTCGCTGGAGCTCATAGATGTCTCTCCTCAGTGAGGACGACCCTTTGAAT	Fungi	Basidiomycota	Agaricomycetes	Thelephorales	Thelephoraceae	Tomentella	tomentella-thelephora	UDB018379	100	3e-103	97.29
OTU723	301_18895|F|ITS2;size=587;	LT978849	ACATCCTCAACTCTCATGGCTTGCTGTGATGAGCTTGGACTTTGGAGGTATTTGCTGGCTTGCGGGGTCAGCTCCTCTCAAATGGATCAGCCTACCAGTGTTCGGTGGCATCACAGGTGTGATAACTATATCTACGCTTGTGGCTTTCCACTGGGTACCTTCATCACTGAAGGTTCACTGGGGCTCATAAATGTCTCTCCTCAGTGAAGACAGCTTTTTGAAC	Fungi	Basidiomycota	Agaricomycetes	Thelephorales	Thelephoraceae	Tomentella	tomentella-thelephora	dbj|AB848668.1	96.41	1.03e-86	94.09
OTU724	301_19079|F|ITS2;size=4897;	LT978610	ACAACAATTTCACAGAGAAATGTGGTGTTGGCCGATGTGTGTCTAGCACTTTGCTGTGCAGGTCCCACTTGGCTGAAATGGATAGGCCAGAGAAGGTACAACTTGGCAGCAGACTCTCAGAGTATTTCCTAATGCTAAACTAGTCTTGTCACATGTTGAAACCTGCGCTCAAGGACCCCCCATTTAGTCCGAACTGTAGA	Fungi	Ascomycota	Pezizomycetes	Pezizales	Tuberaceae	Tuber	tuber-helvella	KF744063	100	1e-86	95.52
OTU725	301_19305|F|ITS2;size=3882;	LT978850	ACACCTCAACTCCCATGGTTCGCCATGGTGAGCTTGGATTTTGGGGGTTTTGCTGGCCTATGGTCAGCTCCTCTCAAATGAATTAGCCTGCCAGTGTTTGGTGGCATCACAGGTGTGATAAATATCTACGCTTGCGATTGCCTGCCAGGTAACCCTCAGCAATGGGGGTTCGCTGGGGCTCATAGACGTCTCTCCCTCAGCGAGGACAGTTTTTTAAC	Fungi	Basidiomycota	Agaricomycetes	Thelephorales	Thelephoraceae	Tomentella	tomentella-thelephora	emb|HE814132.1	100	2.82e-97	96.79
OTU726	301_19351|F|ITS2;size=36314;	LT979875	AATCATCAAAAACCTTTTTCTGTTTACTACTGAAAAGGGTTTTTTGGACTTGGAGGTTCAATGCTTGCCTTTCACTTTTGAAAAGCGAGCTCCTCTCAAATGAATTAGTGGGGTTTGCTTTGCCGATCCTCGACGTGATAAGATGTTTCTACGTTTTGGATTTGGCACTGATGCCCGCTTCTAACTGTCCTCGCGGACAACGATGGTGCTCCGGTCGCCACCGTCCACATTGGCGGAGGAGGGCTGGACCCACGAAAGAAAA	Fungi	Basidiomycota	Agaricomycetes	Russulales	Russulaceae	Russula	russula-lactarius	gb|JQ991802.1	100	9.65e-132	99.62
OTU727	301_19882|F|ITS2;size=2509;	LT979876	AATTCTCAAAAACCTGTTCTTTAACAAGAAAAGGATTTTTGGACTTGGAGGTTTAATGCTGGCCTTTGTCTTGAAAGCAAGCTCCTCTGAAATAGATTAGTAGGATCTGCTTTGCTGATTCTTAATGTGATAAGATGTTTCTACATTTTGGATTTAGCACTGTCTTTTGGATGCCTGCTTCTAACTGTCTTATGGACAATGATGGTGTCTCCGGTCACTGCTATTTATATTGGCAGGAGGCTAGACCCACATAAAAGAAAAAA	Fungi	Basidiomycota	Agaricomycetes	Russulales	Russulaceae	Russula	russula-lactarius	AB509908	100	2e-136	100
OTU728	301_19915|F|ITS2;size=156;	LT978851	ACACCTCAACTCTCATGGCTTGCCATGATGAGCTTGGACTTTGGGGGTCTTGCTGGCCTGCAGTCAGCTCCTCTCAAATGTATCAGCTTGCCAGTGTTTGGGGGCATCACAGGTGTGATAACTATCTACGCTTGTGGTTTCCACCAGGTAACCTTCAGTGATGGAGGTTCGCTGGGGCTCATAAACGTCTCTCCTCGGTGAGGACAGCTTTTTGAAC	Fungi	Basidiomycota	Agaricomycetes	Thelephorales	Thelephoraceae	Tomentella	tomentella-thelephora	gb|KT272128.1	100	1.01e-96	96.79
OTU729	301_20231|F|ITS2;size=22538;	LT979877	AATCATCAAAACCTTTTCTTTGATCCTTTGGGTTGAGAAAAGGATTTTGGACTTGGAGGATCAATGCTCACTCTCACCTTTTTGAAAGTGGGCTCCTCTCAAATATATTAGTGGGGGTTTGCTTCGCCGATCCTTGACGTGATAAGTCGTTTCTACGTTTTGGATTTGGTGCTGTCTCTTTAGACACCTGCTCCTAACTGTCTTATGGACAATGATGGTGTTCTGGTCACCGCTGCCTGTGTTGGTGGTGGGAGGGCTGGACCCACAAGATAA	Fungi	Basidiomycota	Agaricomycetes	Russulales	Russulaceae	Russula	russula-lactarius	gb|KF002752.1	84.62	8.12e-73	89.61
OTU730	301_20373|F|ITS2;size=4341;	LT978852	ACACCTCAACTCCCATGGCTCGCCATGGTGAGCTTGGACTTTGGGGGTTTTGCTGGCCTACGGTCGGCTCCTCTCAAATGAATTAGCCTGCCAGTGTTTGGTGGCATCACAGGTGTGATAAATATCTACACTTGTGATTGCCCACCAGGTAACCTTCAGCAATGGGGGTTCACTGGGGCTCATAGACGTCTCTCCCTCAGCGAGGACAACTCTTTAAA	Fungi	Basidiomycota	Agaricomycetes	Thelephorales	Thelephoraceae	Tomentella	tomentella-thelephora	emb|LN909647.1	98.62	6.1e-94	96.28
OTU731	301_20529|F|ITS2;size=1961;	LT980573	ATATATCAACCTCTTCAGCTTTTGCATGTCGAGTTGTTGGATGTGGGGGTATTTTTTGCTGGTCTCTAAATCTCTGAGTTCAGCTCCCCTAAAATGCATCAGCGAAACAATTTGTTTACCGCTCATTGGTGTGATAACTATCTACGCTATTGACGGTAAAGCATGTTTAGCTTCTAACAGTCCATTAACTTGGACAATCTCTTATTA	Fungi	Basidiomycota	Agaricomycetes	Agaricales	Cortinariaceae	Cortinarius	cortinarius	gb|JQ991694.1	100	3.83e-101	99.52
OTU732	301_20900|F|ITS2;size=1095;	LT978853	ACACCTCAACTCCCATGGTTTGCCATGGTGAGCTTGGACTTTGGGGGTTTTGCTGGCCTGCGGTCAGCTCCTCTCAAATGAATTAGCCTGCCAGTGTTTGGTGGCATCACAGGTGTGATAAATATCTACACTTGCGATTGCCCACCAGGTAACCTTCAGCAATGGGGGTTCGCTGGGGCTCATAGACGTCTCTCCCTAAGTGAGGACAGTTTTTTAAC	Fungi	Basidiomycota	Agaricomycetes	Thelephorales	Thelephoraceae	Tomentella	tomentella-thelephora	emb|HE814192.1	100	6.06e-99	97.25
OTU733	301_21009|F|ITS2;size=2;	LT979439	AATCTCAACCATTAGGGTTTGCCGTGGAGAGCTTGGACTTTGGAGGTTTGCTGGCCCCTCGGTCGGCTCCTCTCAAACGAATCAGCTTTCCAGTGTTTGGTGGCGTCACGGGTGTGATAACTATCTACGCTCGCGATCCGTCCGCCTCGCAACCTTCAGCGATGGAGGTTCGCTGGAGCTCAAAAACGTCTCTCCTCAGCGAAGACAGCTTTTCTGAC	Fungi	Basidiomycota	Agaricomycetes	Thelephorales	Thelephoraceae	Thelephora	tomentella-thelephora	gb|JQ991848.1	98.62	2.2e-93	96.3
OTU734	301_22250|F|ITS2;size=23484;	LT980920	AAAACCCTTTCACAGATAACATGTGGTATTGGTAGAAGTTGATAGTACTAACACTACTTTGTCTTACTCTACTGAAATAAATAGGCCAGAGAAGTGGACCATGGTAATAGACTCCAGGAGTGTTCTAAAATGCTAAATTAGTCTTATCAAAGTCACATTCTGAGCTACTGAACCCCCATTTAGTTCAAACAAAAGA	Fungi	Ascomycota	Pezizomycetes	Pezizales	Tuberaceae	_	tuber-helvella	JQ991906	100	5e-96	98.98
OTU735	301_23035|F|ITS2;size=226;	LT978854	ACACCTCAACTCTCATGGTTTTCCATGATGAGCTTGGACTTTGGGGGTCTTGCTGGCCTATGGTCAGCTCCTCCCAAATGAATCAGCTTGCCAGTGTTTGGTGGAGTCACGGGTGTGATAACTATCTACGCTTGTGTCATCCCATCAGGTAACCTTCAGCGATGGAGGTTCGCTGGAGCTCACAAATGTCTATCCTCAGCGAGGACAGCTTTCTTTAAC	Fungi	Basidiomycota	Agaricomycetes	Thelephorales	Thelephoraceae	Tomentella	tomentella-thelephora	AB848649	95	2e-96	97.14
OTU736	301_23109|F|ITS2;size=2579;	LT978855	ACACCTCAACTCTCATGGTTTGCCGTGATGAGCTTGGACTTTGGAGGTTTTGCTGGTCTTTGATCTGCTCCTCTTGAATGAATCAGCCTGCCAGTGTTTGGTGGCGTCGCAAGCGTGATAACTATCTACCCTTGAGACTGCCTACCAGGTAACCTTCAGTGATGGAGGTTCGCTGGGGCTCATAGACGTCTCTCCTCAGCGAGGACAGCTTTTTAAC	Fungi	Basidiomycota	Agaricomycetes	Thelephorales	Thelephoraceae	Tomentella	tomentella-thelephora	UDB018459	99	2e-75	90.28
OTU737	301_23165|F|ITS2;size=4309;	LT978856	ACACCTCAACTCTCATGGTTTGCCATGATGAGCTTGGACTTTGGGGGACTTGCTGGCCTGCGGTCAGCTCCTCTCAAATGAATCAGCTTTCCAGTGTTTGGTGGCATCACAGGTGTGATAAATATCTACGCTTGTGGTTTGCTGCCAGGTAACCTTCAGTGATGGGGGTTTGCTGGGGCTCATAAATGTCTCTCCTCAGTGAAGACACCTTTGTGAAT	Fungi	Basidiomycota	Agaricomycetes	Thelephorales	Thelephoraceae	Tomentella	tomentella-thelephora	gb|JQ991893.1	100	1.29e-105	99.08
OTU738	301_23460|F|ITS2;size=7605;	LT978857	ACACCTCAACTCTTCATGGTTTTCTATGATGAGCTTGGACTTTGGGGGGTTTTTGCTGGCCCTATGGTCGGCTCCTCTAAAATGAATCAGCTTGCCAGTGTTTGGTGGGCATCACGGGTGTGATAAACTATCTACGCTTGTGGTTTTCCACCAGGTAACCTTCGGCAGTGGAGGTTCACTGGAGCTTACAGATGTCTCTCTTCGATGAGGACAGCCCTTTGAAT	Fungi	Basidiomycota	Agaricomycetes	Thelephorales	Thelephoraceae	Tomentella	tomentella-thelephora	AB507033	100	2e-111	99.11
OTU739	301_24166|F|ITS2;size=501;	LT978858	ACACCTCAACTCTCATGGTTTGCCGTGATGAGCTTGGACTTTGGGGGTTTTGCTGGCCCATGTGGTTGTGGCTCCTCTCAAATAAATCAGCTTGCCAGTGTTTGGTGGCTCCATGAGTGTGATAACTGTCTACGCTTGTGGTTGTCCACCAGGTGACCTTCAGCGATGGAGGTTTGCTGGAGCTTACAAATGTCTCTCCTCAGCAGAGACAGTTTTTTGAAT	Fungi	Basidiomycota	Agaricomycetes	Thelephorales	Thelephoraceae	Tomentella	tomentella-thelephora	gb|KC412551.1	99.1	7.98e-73	90.05
OTU740	301_24211|F|ITS2;size=1678;	LT979878	AACCCTCAAAATCCTTTTTCTTTTTTGGGAAAAGGATTTTGGACTTGGAGGTTCAATGCTTGCTCTCACTTTTGAATGCGAGCTCCTCCCAAATGAATCAGTGGGGTCCGCTTTGCTGATCCTTGACGTGATAAGATGTTTCTACGTTTTGGATTTGGCACTGTCCCTTGCTTCTAACAGTCCCTTGGACGATGATGGTGCTCCGGTCGCCGCCACCTTATGCTGGCGGGAGGCTGGGCCCACAAAAA	Fungi	Basidiomycota	Agaricomycetes	Russulales	Russulaceae	Russula	russula-lactarius	KM576537	100	5e-107	95.16
OTU741	301_24468|F|ITS2;size=1639;	LT980574	ATATATCTCAATCTCTGCAGCTTTTTGCTGGTTGAGTGTTGGATGTGGGGGTGTTTTGTTGGCCTTTTTTCTTTTGAGGTCAGCTCCCCTGAAATGTATTAGCAGAACAATTTGTTGATCGTTCATTGGTGTGATAAAGCTAATCTACGCTATTGACGTGAAGCAGGTTCAGCTTCTAACAGTCCATTGACTTGGACAACTCTTCATTA	Fungi	Basidiomycota	Agaricomycetes	Agaricales	Cortinariaceae	Cortinarius	cortinarius	KF961223	99	4e-82	93.33
OTU742	301_25334|F|ITS2;size=5147;	LT979440	ACACCTCAACTCTCATGGTTCTCCATGACGAGCTTGGACTTCTGGGGGTTTTGCTGGCCTGCGGTCGGCTCCTCTCAAATGGATCAGCTTTCCAGTGTTTGGTGGCGCTATGGGTGTGATAACTATCTACGCTTGTGGTCGTCTGCCAGATAACCTTTGGTGACAGAGGTTTGCTGGAGCTTACAAACGTCTCTCCTCAGCGAAGACAGCTTTTGATC	Fungi	Basidiomycota	Agaricomycetes	Thelephorales	Thelephoraceae	Thelephora	tomentella-thelephora	emb|LN911994.1	100	2.75e-102	98.17
OTU743	301_282|F|ITS2;size=2215;	LT978859	ACACCTCAACTCTCATGGCTTGCCATGATGAGCTTGGACTCTGGGGGTCTTGCTGGCCTACGGTCAGCTCCTCTCAAATGAATCAGCTTGCCAGTGTTTGGTGGCATCACAGGTGTGATAACTATTTACGCTTGTGGTTTTACACCATATAACCTTCGGTGACGGAGGTTCGCTGGGGCTCACAAATGTCTCTCCTCAGCGAGGACAGCTCTTTGAAC	Fungi	Basidiomycota	Agaricomycetes	Thelephorales	Thelephoraceae	Tomentella	tomentella-thelephora	KM576657	100	1e-93	95
OTU744	301_4|F|ITS2;size=17140;	LT978860	ACACCTCAACTCTCATGGCTTGCCATGATGAGCTTGGACTTTGGGGGTCTTGCTGGCCTGTGAGTCAGCTCCTCTCAAATGAATTAGCTTGCCAGCGTTTGGTGGCATCACAGGTGTGATAACTGTCTACGCTTGTGGTTTTCCACCAGGTAACCTTCAGCAATGGAGGTTCGCTGGAGCTCATAAATGTCTCTCCTCGGTGAGGACAGATTTTTGACC	Fungi	Basidiomycota	Agaricomycetes	Thelephorales	Thelephoraceae	Tomentella	tomentella-thelephora	AB769922	100	4e-112	100
OTU745	301_451|F|ITS2;size=281;	LT980765	AAATCTTCAAGATAGATCTTTCGTTCGTTCGATTGATTTCATTTTGGACTTGGAGGTCTTGCAGATTCTCATGTCTGCTCCTCTCAAATGCATTAGCTGGATCTCCGTGAGCCTCGGTTCCACTCGGTGTGATAAGTAATCGCTCGCTGAGGACACTGTAAAAAGTGGCTGGGCCCCAGGGATGAACTGCTTCCAACCGTCCATTGGCTTGGACGATTGAACCTTTATG	Fungi	Basidiomycota	Agaricomycetes	Cantharellales	Ceratobasidiaceae	Ceratobasidium	ceratobasidium2	gb|KP783433.1	100	1.97e-84	91.78
OTU746	301_4533|F|ITS2;size=6540;	LT978649	AATTCTCAACTGTCCCAGGCTTTGTGGCTTGTGGGTGAAGTTGGACTTGGAGGCATGCTGGCGCATGAATGGGCTTTGTGTCCTGCTGTGCTTGTCGGCTCCTCTTGAATGTATGAGCTTTCCAATCCTTGGCAAAGTATCATCGATGTGATAATTATCTGCATCGCCTGAGAAAGCCTAACAGGGGGAAATCTTTGATCACGTTGGGGGTGACCCGCGTCTGACAA	Fungi	Basidiomycota	Agaricomycetes	Thelephorales	Thelephoraceae	Tomentellopsis	tomentellopsis	UDB020323	100	3e-94	94.27
OTU747	301_9811|F|ITS2;size=844;	LT978861	ACACCTCAACTCTCATGGTTTGCCATGATGAGCTTGGACTTTGGGGGTCTTGCTGGCCTATGGTCAGCTCCTCTCAAATGAATCAGCTTTCCAGTGTTTGGTGGCATCACAGGTGTGATAACTATCTACGCTTGTGGTTTTCTGCCAGGTAACCTTCAGCAATGGGGGTTCGCTGGGGCTCATAAATGTCTCTCCTCAGTGAAGACAGCTTTGTGAAC	Fungi	Basidiomycota	Agaricomycetes	Thelephorales	Thelephoraceae	Tomentella	tomentella-thelephora	HE814073	100	2e-106	98.62
OTU748	302_25355|F|ITS2;size=5867;	LT979879	ATACTTTCAACCTTCTTGGTTTCTTTGACCAGAAAGGCTTGGACTTTGGAGGTTTTTCTTGCTGGCCTCTTTTGAAGCCAGCTCCTCCTAAATGAATGGGTGGAGTCCGCTTTGCTGATCCTCGACGTGATAAGCATTTCTTCTACGTCTTGTCAGCTCGGAACCCGCTTTCTAACCGTCTTTGGACAAAGACAATGTTCGAGTTGTGACTCGACCATACAAA	Fungi	Basidiomycota	Agaricomycetes	Russulales	Russulaceae	Russula	russula-lactarius	gb|KT933978.1	100	6.06e-99	96.46
OTU749	302_25420|F|ITS2;size=29;	LT980575	ATATATCAACCTCTTCAGCTTTTGCTTGTTGAGTGTTGGATGTGGGGGTCTTTTTGCTGGTCTTTTAAAGAGGTCAGCTCCCCTAAAATTTATTAGCGGAACAATTTGTTGACCGTCCATTGGTGTGATAATTATCTACACTATTGATGTGAGGCAGTTCAGCTTCTAATAGTTCATTGACTTGGACAATTTTTCATTA	Fungi	Basidiomycota	Agaricomycetes	Agaricales	Cortinariaceae	Cortinarius	cortinarius	FJ039658	97	7e-90	97.42
OTU750	302_25473|F|ITS2;size=5795;	LT979880	AATCATCAAAACCTTTTTTCAATGATCTTTTTGGTCGAGAAAAGGATTTTGGACTTGGAGGATCAATGCTCACTCTCACTTTTCGAAAGTGAGCTCCTCTCAAATGAATTAGTGGGGGTTTGCTTCGCCAATCCTTGACGTGATAAGTTGTTTCTACGTTTCGGATTTGGTGCTGTCCCTTGGACACCCGCTTCTAACCGTCTTATGGACGACGATGGTGTTCCGGTCACTGCTGCCTGTGTCGGTGGGAGGCTGGACCCACAAGAAAA	Fungi	Basidiomycota	Agaricomycetes	Russulales	Russulaceae	Russula	russula-lactarius	gb|KF002752.1	85.5	6.23e-79	91.3
OTU751	302_25763|F|ITS2;size=738;	LT980884	TAAATTATCAAAGTCACCTTGATGAATTGTTGGGGTGGTTTTGGAAGTGGGAGATGCAGGTCTTGTGGTATGTTATGGGACCAGCTATCCTGAAATATATTAGCAGAGTCAGGTGGAGCTTTTTACTGGTGTAATAAGAATAAATATTGTCACCGAAAAAAGAGAAAGCGACATGTGTTGAAGTCTGCTGCTTGTCGTCCGTGTGTGGACAAGTTGATTA	Fungi	Basidiomycota	Agaricomycetes	Agaricales	Amanitaceae	Amanita	amanita	AB015686	100	6e-111	99.55
OTU752	302_29513|F|ITS2;size=20;	LT980365	GAAACTTATCAACCACCTTCAAAGTGGCTTGGAAATGGGGGGAGTGTGTTGCAGGCTTTTTATCAGAGTCTGCTCCCCTAAAATATATTAGTGGTGTCTGGGCTGACTGCCACAGGTGTGATAACTATCAGTGCCTTGGTGGGAACCTTGCCGCTTACAACTCTGATTGACCA	Fungi	Basidiomycota	Agaricomycetes	Agaricales	Inocybaceae	Inocybe	inocybe	gb|KR149755.1	100	8.83e-53	89.77
OTU753	302_33573|F|ITS2;size=5;	LT980885	TAAATTATCAAAGTCACCTTGAATTTATTGGGGTGGTTTTGGAAGTGGGAGATGCAGGTCTTTGTAGTATGTATGGGACCAGCTATCCTGAAATATATTAGCAGAGTCAAGTGGAGCTTTCACTGGTGTAATAAGAATAAATATTGTCACCGAAAAAAGAGAAAGCGACATGTGTTGAAGTCTGCTGCTTGTCGTCCGTGTGTGGACAAGTTGATTA	Fungi	Basidiomycota	Agaricomycetes	Agaricales	Amanitaceae	Amanita	amanita	AB015686	100	1e-93	95.05
OTU754	302_34842|F|ITS2;size=2;	LT980464	TACTATCAAGTGCCTATGGGTTGATCGCCATATGTGTTTGGATTTGGACTCTGCTGTGTCAATACGGCTGGTCTTAAATGTATCAAGCTTGGTCCTTTATAAGGGGAATTTTGGTTCTTACTCGGCGTGATAATTATCTAACGTTGAGGACAGTCCCTGTGACTGGCCAGAGAGAGTCTCTTTTGGATCGCTTCTAAGAAAAATTCGTAATTA	Fungi	Basidiomycota	Agaricomycetes	Cantharellales	Hydnaceae	Hydnum	cantharellus	AB808005	99	3e-78	91.71
OTU755	302_34993|F|ITS2;size=7785;	LT980886	AATATCTCAAAATCCTTGTGCTTTTTTGGCATGAGATTTTTGGACATTGGGAGTTGCTGGCCGCTGACAAAGTGGTGGGCTCTTCTGAAAAGCATTAGTTGAGGAGCTTTTGCATTCTCTATTGGTGTGATAGACTATCTATGCCAGGAGATGCTTCATGGGATCCCTCTGCTGTCTAACCGTCTTTATCAAGACAAATTTGATAA	Fungi	Basidiomycota	Agaricomycetes	Agaricales	Amanitaceae	Amanita	amanita	UDB002317	100	3e-78	92.75
OTU756	302_35130|F|ITS2;size=17837;	LT980887	AATATCTCAAAAAGCTTGTGCTTTTTTGGCATGGGATTTTTTGGACATTGGGAGTTGCCAGCTGCTGATAAAGTGGTGGGCTCTTCTGAAAAGCATTAGTTGAGGAGCTTTGCACTCTATTGGTGTGATAGACTATCTATGCCAGGAGATGCTTCATGATCCTCTGCTGTCTAACTGTCTTTATCAGACAATATGATAA	Fungi	Basidiomycota	Agaricomycetes	Agaricales	Amanitaceae	Amanita	amanita	KF245918	100	2e-95	98.49
OTU757	302_35229|F|ITS2;size=40284;	LT979881	CATTCTCAAAGAACCTTTCTTTGGAAAGGCTTTTTGGACTTTGGAGGTTATTGCTGGTCCCCCTTTGATAGCCAGCTCCTCTTAAATGGATTAGTAGGGACCACTTTGCAGACCCTAGACGTGATAAGATGTTTCTGCGTCTTGGGTATTTGCTCTGTCGTTTGGAGACCTGCTTCTAACCGTCTTGTTAAAAGACAGCATTCGAGCCTTTCTCGTAAAGGCTTGACTCATGAA	Fungi	Basidiomycota	Agaricomycetes	Russulales	Russulaceae	Russula	russula-lactarius	KC185410	100	2e-120	100
OTU758	302_35484|F|ITS2;size=32;	LT980888	AGTATCTCAAAAGTTCTTATGTATATATATGCATGGGTCTTTTGGACATTGGGAGTTGCCAGTCATGGATAAAGTGGTGGGCTCTTCTGAAAAGTATTAGTTGAGGAGCTTTGCACTCTATTGGTGTGATAGGCTATCTATGCCAGGAGATGCAGTATAACTTAGCCTCTGCTGTATAACTGTCCTTATTGGACAATATGATGAAC	Fungi	Basidiomycota	Agaricomycetes	Agaricales	Amanitaceae	Amanita	amanita	KP004945	100	3e-78	92.72
OTU759	302_35795|F|ITS2;size=13671;	LT980889	AGTATCTCAAAAGTTCTTATGCATATATGCATGGGTCTTTTGGACATTGGGAGTTGCCGATTACTGATAAAGTGGTGGGCTCTTCTGAAAAGTATTAGTTGAGGAGCTTTGCACTCTATTGGTGTGATAGACTATCTATGCCAGGAGATGCAGTATAAAGCCTCTGCTGTCTAACGGTCCTTATTGGACAACATGATGA	Fungi	Basidiomycota	Agaricomycetes	Agaricales	Amanitaceae	Amanita	amanita	KP004945	100	5e-101	100
OTU760	302_37523|F|ITS2;size=1516;	LT979548	TACTCTCACACTCTCTCTGATTATTTTATTAGAGCGAGCGGTGGACTTGGATGCTGCCTGGAACTTACTGTCAGGCTCATCTCAAATGAGTTAGTACGACTGCTAGTTAAACATAGTACGGCGTGATAACATAACCCTCGCTGTTTTACGTCTGATTAGGAGCCTGTGCTTCCAACCGTCCTCGGACAATGACTGATA	Fungi	Basidiomycota	Agaricomycetes	Sebacinales	Sebacinaceae	Sebacina	sebacina	UDB013037	100	1e-97	99
OTU761	302_37751|F|ITS2;size=6;	LT978862	ACACCCTCAACTCCTCATGGTTTTCCGTGATGAGCTTGGACTTTGGGGGTCTTGCTGGCCTATGGTCAGCTCCTCTAAAATGAATCAGCTTGTCAGCGTTTGGTGGGCATCACAGGTGTGATAAATATCTACGCTTGTGGTTTTCCACCAGGTAACCTTCAGCAGTGGAGGTTCGCTGGAGCTCACAGATGTCTCTCCTCGGCGAGGACGGCTCTTTGAAT	Fungi	Basidiomycota	Agaricomycetes	Thelephorales	Thelephoraceae	Tomentella	tomentella-thelephora	AB507038	100	1e-103	97.29
OTU762	302_37846|F|ITS2;size=434;	LT980115	TCGTTCTCAACCAACGGAGGGATTCGTTGGCTTGGAGTTGGGAGTTGCTGGCTTCGTTCAGCTGTCCTGAAAGACATTAGGCTGACGTGCACGGCTTTCAGGCGTGATAATGATCGCCTTGGCTGGAGCGTGGCTTGAACTATCTTTACCCCCCTTGA	Fungi	Basidiomycota	Agaricomycetes	Boletales	Boletaceae	Retiboletus	boletus	AB509818	100	2e-73	98.11
OTU763	302_38474|F|ITS2;size=540;	LT981154	ATTTCTCAACCTTATCATTTTTCATGACAAGGCTTGGACTTGGGGTTTTGCAGGCTTCAACCCAATGAAGTTGGCTTCCCTTAAATGCATTAGCCGGAAAACTCTTGTGGTCCGTCTATTGGTGTGATAATTATCTACATCGTGGACAGGCAGTAATGGGTTTTCTGCTTCAAACCGTCCTTAGGGACAACAATGACC	Fungi	Basidiomycota	Agaricomycetes	Agaricales	Bolbitiaceae	_	descolea	JQ666825	100	1e-82	94
OTU764	303_42161|F|ITS2;size=42905;	LT980825	AATTCTCAACCATGCCTTGATTTATTTCAAGGTCATGGCTTGGACTTGGGATCTTGCTGGCAGCGAAAAGCAGCTCAGCTGTCCTGAAATGCATTAGCAAAGGCAAGAGGCAGGTCTTTCTAGGACGTGCACGGCCTTCGACGTGATAATGATCGTCGTGGCTGGAGCGTCGGACGTGCATCCAAATTGTCTTGCTTCCAATCCTTGATGTCGACCACTTTCGTTGTGGGATCGATGTCATTTTTGACC	Fungi	Basidiomycota	Agaricomycetes	Boletales	Boletaceae	Boletus	boletus	gb|JQ991664.1	100	1.82e-84	90
OTU765	303_42292|F|ITS2;size=51;	LT980766	AAATTCTCAAAGTAAATTCTTTTGTTAATTCAATTGGTTTACTTTGGATTTGGAGGCTTTGCAGAGTTTACAATCTCTGCTCCTCTTGAATGTATTTAGCTGGATCTCAGTGTATACTTACTTGGTTCCACTCGGTGTGATAAGTATCACTCGCTGAGGACACACCTGTAAAAAGGTGGCCAAGGTATACACAGATTGAGCCGCTTCTAATAGTATATATATTTCAAG	Fungi	Basidiomycota	Agaricomycetes	Cantharellales	Ceratobasidiaceae	Ceratobasidium	ceratobasidium1	gb|GQ175302.1	95.61	1.56e-70	90.41
OTU766	303_42774|F|ITS2;size=995;	LT978863	ACACCTCAACTCTCACAGTTTGCTGTGATGAGCTTGGACTTTGGAGGTTTTTGCTGGCCCGTGGTCGGCTCCTCTCAAACGAATTAGCTTGCCAGTTTTCGGTGGCGTCACAGGTGTGATAACTATCTACGCTCGTGGTCGTCTGCTGGGTAACCTTTCGGCAACGGAGGTTTGCTGGAGCTCATAAACGTCTCTCCTCAGTGAAGACAGCTTTTTGAAC	Fungi	Basidiomycota	Agaricomycetes	Thelephorales	Thelephoraceae	Tomentella	tomentella-thelephora	emb|LN912452.1	100	2.16e-103	98.18
OTU767	303_43122|F|ITS2;size=26380;	LT980254	AAACCTCAACCTTCTCGGTTTCTTCTGGACGCCGAAGGAGGCTTGGACTTTGGAGGCCATTGCCGGCGTCTCTGCCGGCTCCTCTCAAATGAATTAGCGGGGTCCTCTTTGCCGGTCCTCGACATGTGATAAGATGTTTCCATGTCTTGGTTTATGGCTCTGTCACCTTTGGGACCCGCTTCTAGCCGTCTCGTCGAGACGTGTCTCCCTTCTCGGGGAAACGCTCTCGGACCCACGAAC	Fungi	Basidiomycota	Agaricomycetes	Russulales	Russulaceae	Lactarius	russula-lactarius	emb|LN910867.1	100	3.52e-121	100
OTU768	303_43276|F|ITS2;size=12184;	LT978864	ACACCTCAACCCTCAGGGCTTGCCATGATGGGCTTGGACTTTGGGGGTCTTGTTGGCCTGTGAGCCAGCTCCCCTTAAATGAATTAGCTTGCCAGTGTTTGGTGGCGTCACAGGTGTGATAACTATCTACGCTTGTGGTTTCCCACCAGATAACCTTCAGCGATGGAGGTTCGCTGGAGCTCATAAATGTCTCTCCCCAGTGAGGACAGATTTTGACC	Fungi	Basidiomycota	Agaricomycetes	Thelephorales	Thelephoraceae	Tomentella	tomentella-thelephora	gb|JQ991878.1	100	2.94e-107	99.54
OTU769	303_44044|F|ITS2;size=7734;	LT980576	ATATATCAAACTTCTCTCTTGTTGAGTTGTTTGGATGTGGGGGTTTGCTGGCCTCTTGAAGGGGTATTTCAGCTCTCCTGAAATGCATTAGCAGAGCAAACCTGTTCATTGGTGTGATAACTATCTACGCTTTTGAATGTGAAAGGGGAGCTAAGCTTTCTAACAGTCTTTGGACAAAATTCATCATTA	Fungi	Basidiomycota	Agaricomycetes	Agaricales	Cortinariaceae	Cortinarius	cortinarius	FJ378750	100	2e-70	92.63
OTU770	303_46219|F|ITS2;size=42;	LT980210	AATCTTCAACCTTCTCTGCTTCTTTTTGATCAGGGAAAGGCTTGGACTTTGGAGGTCTCTGCTGGCATCTCATCAAGTCAGCTCCTCTTAAAAGCATTAGCGGGGGTTTCCTTTTGTCAATCCTCGACGTGATAATGTTTTTCTACGTCTAGGTCTTGACTTTAAGACCCGCTTCTAATGGTCTCATTGAGACGCTTGGTTGAGTTTTGCCCCTCAGTTGGGGGGTGGGACTTTGACCCATATGAACC	Fungi	Basidiomycota	Agaricomycetes	Russulales	Russulaceae	Lactifluus	russula-lactarius	JQ991761	100	6e-116	97.18
OTU771	303_46947|F|ITS2;size=629;	LT978865	ACTTCTCAACTCCTCACGGTTCACCCGTGATGAGCTTGGACTTTGGGGGTCTTGCTGGCCTGCAGGTCGGCTCCTCTCAAATGAATCAGCTTGCCAGTGTTTGGCGGCGTCACAGGTGTGATAACTATCTACGCTTGTGGTTTTCCGCCAGGTAACCTCCAGCGATGGGGGTTCACTGGAGCTCACAAATGTCTCTCCTCGGCGAGGACGGCTGTTTGAAT	Fungi	Basidiomycota	Agaricomycetes	Thelephorales	Thelephoraceae	Tomentella	tomentella-thelephora	emb|LN911551.1	98.19	1.01e-96	96.79
OTU772	303_47746|F|ITS2;size=8336;	LT980847	AATTCTCAACCATGTCTTCATTGACTTGGCTTGGAGTTGGGGGTTTGCTGGCGGTGTTCTCTATCATCAGCTCTCCTGAAATGCATTCGTGATCAGTTGTTATTAGGGCATGCACGGCCTTTCGACGTGATAATGATCGTCGAGGGCTGGAGTGTCCTTGACTAACTAGATCGCTTTCATTACTTGCAAGCAAGCTCTTGCTTTTTGGTTATTAGCTGGTCAACGGCGAACACCAAAGCGTAGACTTGACTTGACTTGACTTTTGAA	Fungi	Basidiomycota	Agaricomycetes	Boletales	Boletaceae	Aureoboletus	boletus	dbj|AB973720.1	98.13	1.02e-131	99.62
OTU773	303_48952|F|ITS2;size=876;	LT980781	CACCACTCAAGCCTGGCTTGGTGTTGGGCGACGTCCCCTTCGGGGGACGCGCTTCGAAACGCTCGGCGGCGTGGCACCGGCTTTAAGCGTAGCAGAATCTTTCGCTTTGAAAGTCGGGGCCCCGTCTGCCGGAAGGCCTACTCGCAA	Fungi	Ascomycota	Dothideomycetes	Hysteriales	Gloniaceae	Cenococcum	cenococcum	AB571489	100	2e-68	98.64
OTU774	303_51859|F|ITS2;size=5629;	LT979882	AATTCTCAAAACCCTTTCTTTGGTCTTTTGATCAGGGGAAGGATTTTTGGACTTGGAGGCCTTTTGCTGGTTTCACCTTGAAGCGAGCTCCTCCCAAATGGATTAGTGGGGTCTGCTTTGCCGATCCTTGGCGTGATAAGTTGTTTCTACGTCTTGGGTTTTGGCACTGTACACCTGCTTCTAACTGTCTCATCGACAATGATGGTGCTCTGGTCACCGCCGATTTCTCGGTGGGAGGCTTGACCCACAAAATGAAC	Fungi	Basidiomycota	Agaricomycetes	Russulales	Russulaceae	Russula	russula-lactarius	emb|LN909623.1	100	1.25e-130	100
OTU775	303_53116|F|ITS2;size=829;	LT978866	ACACCTCAACTCTCACGGTTTTTCGTGATGAGCTTGGACTTGGGGGTTTTGTTGGCCTGTGGTCAGCTCTCCTCAAATGAATTAGCTTGCCAGTGTCTGGCGGCATCATGGGTGTGATATACATCTACGCTTGTGATTGCCTGCAAAGTAAACCTCTGTTCTGCGGGGGTTCACTGGAGCTTATAGATGTCTCTCCTCAGTGAAGACAGCCGTCTGAA	Fungi	Basidiomycota	Agaricomycetes	Thelephorales	Thelephoraceae	Tomentella	tomentella-thelephora	gb|KP814173.1	100	1.43e-75	90.87
OTU776	303_53490|F|ITS2;size=323;	LT980812	AATTCTCAACTTCACCGAATTTGATTCGAGTGGAAGCTTGGAGTTTGGAGCGTGCTGGCCCTTACCCAGGGTCGGCTCCTCTTTAAATGCAGCAGCGGAGTCATCTTTTGACCCTTGCGGCGTTGGCGTGATAGTCGTTTGTTGCGTCGTTGGCCTCAAGGTGTCTCGATCCGCTTATAAAATGGTCTCTTGGGACAAATGAATGAAAT	Fungi	Basidiomycota	Agaricomycetes	Atheliales	Atheliaceae	Byssocorticium	byssocorticium	UDB016321	90	3e-69	92.55
OTU777	303_55801|F|ITS2;size=225;	LT981000	CCCCACAACTCAAGCATCCATTTAATGATGCCTGGATTTCTTTGGAGAGGTATCACTTTTTATTAAGAGAAGCCCTCCAGAAATTCATAGGCAGTATGATTTGCACTAGAACCAGGCGTAATAATAATAAAATCGTTTGTTGTGGCATAAGCCTTGTACTTGCCTTGAAAACACCCATTGATTTTC	Fungi	Ascomycota	Pezizomycetes	Pezizales	Pezizaceae	_	terfezia-peziza	HE814085	100	8e-74	93.55
OTU778	303_58326|F|ITS2;size=799;	LT979883	AATTCTCAAAACCATTTCTTTTGGTCATTTTTGACCATGGAAAGGATTTTGGACTTGGAGGCCTTTTGCTGGTTTCGCCTTGAAGCGAGCTCCTCCCAAATGTATTAGCGGGGTTTGCATTGTCGGTCCTTGGCGTGATAAGTTGTTTCTACGTCTTGGACTTTTGGCGTTGTACACCTGCTTCTAACTGTCTTATTGACAACGATGGTGTTCCGGTCTCCGCCGATTTTATCGGTGCGAGGCTTGACCCACAAAATGAA	Fungi	Basidiomycota	Agaricomycetes	Russulales	Russulaceae	Russula	russula-lactarius	gb|KP753352.1	98.46	1e-106	94.57
OTU779	303_60428|F|ITS2;size=1951;	LT978867	ACACCTCAACTCCCATGGTTCGCCGTGGTGAGCTTGGACTTTGGGGGTTTTGCTGGCCTACGGTCGGCTCCTCTCAAATGAATTAGCCTGCCAGTGTTTGGTGGCATCACAGGTGTGATAAATATCTACGCTTGCGATTGCCCACCAGGTAACCTTCAGCAATGGGGGTTCGCTGGGGCTCATAGACGTCTCTCTCTCAGTGAGGACAACTCTTTAAC	Fungi	Basidiomycota	Agaricomycetes	Thelephorales	Thelephoraceae	Tomentella	tomentella-thelephora	emb|LN909647.1	100	2.84e-92	95.43
OTU780	303_60705|F|ITS2;size=50;	LT980335	AATTCTCAACCTTTCCATTAATTTGGTTTGGCTTGGATGTGGGGGTTGCAGGCTTCATTTGACTATGAGGTCAGCTCTCCTTAAATGCATTAGTGGAACTTTTGTTGACCATCTATTGGTGTGATATCTATCTACACTGTGGATGTGAAGCAGTGTTCAGCTTCTAACCGTCTATTATTGACTTTACTTGACC	Fungi	Basidiomycota	Agaricomycetes	Agaricales	Hydnangiaceae	Laccaria	laccaria	gb|JQ347174.1	100	4.98e-95	100
OTU781	303_61296|F|ITS2;size=1889;	LT979549	TACTCTCACACTCTAATTCATTTTGGAGAAGTGGACTTGGGTGTTGCCGCTTTGCTGTGGCTCATCTTAAATATGCTAGTGCAACTCATGGTTGGATATAGTACAGCGTGATAAGTATCTTCGCTGGCACCTCATGAAGAGGGTATCCGATTGGGAGCTCTGTGCTTCCAACTGTCCCATCCGGGACAATCTCTGACA	Fungi	Basidiomycota	Agaricomycetes	Sebacinales	Sebacinaceae	Sebacina	sebacina	dbj|AB848613.1	100	3.66e-81	94.95
OTU782	303_61310|F|ITS2;size=3154;	LT978868	ACGCCTCAACTCTCATGGTTTTACCGTGATGAGCTTGGACTTTGGGGGTCTTGCTGGCCAGCGGTCGGCTCCTCTCAAATGAATCAGCTTGCCAGTGTTTGGTGGCATCACAGGTGTGATAACTATCTACGCTTGTGGTTTCCTGCCAGGTATCCTTCAGCAATGAAGGGTCGCTGGAGCTTATAAATGTCTCTCCCCCGGTGAGGACAACTTCTTGAA	Fungi	Basidiomycota	Agaricomycetes	Thelephorales	Thelephoraceae	Tomentella	tomentella-thelephora	emb|LN912484.1	99.09	4.57e-105	99.08
OTU783	303_61343|F|ITS2;size=21716;	LT980826	AATTATCAACCATGTCTAGATTGATTTCGAAGCCATGGCTTGGAGTTGGGATGTTGCTGGCAGTGAAATGCAGTCAGCTGTCCTGAAATGTATTAGCAAAGGTGAACATGCAGGTCTTTCTTGGACATGCACGGCCTTCGATGTGATAATGATCGTCGTGGCTGGAGTGTTCAGACATGCACTAAATCATCCTTGCTTCCAATCCTTTAACATTGACTGCTTTTTGTGGAAAAATGTTATTTTTGACA	Fungi	Basidiomycota	Agaricomycetes	Boletales	Boletaceae	Boletus	boletus	AB973752	100	4e-88	90.44
OTU784	303_61576|F|ITS2;size=14465;	LT978869	ACATCTCAACTCTTATGGTTTTCCATGATGAGATTGGACTTTGGGGGTCTTGTTGGCTCGTGTTCAGCTCCCCTAAAATCTATCAGCTTTCCAGTGTTTGGTGGCATCACAGGTGTGATAAATATCTACGCTTGTGGTCGTTTACCAGGTCTGCCCTCTCCTTGTGAAGGGCTCGCTGGAGCTCATAGATGTCTCCCCTTGTGGAGACAGCTGTTTGAA	Fungi	Basidiomycota	Agaricomycetes	Thelephorales	Thelephoraceae	Tomentella	tomentella-thelephora	emb|LN912346.1	100	7.73e-108	99.54
OTU785	303_61685|F|ITS2;size=4693;	LT978870	ACACCTCAACTCCCATGGCTTGCCATGATGAGCTTGGACTCTGGGGGTCTTGCCGGCTGTGTAGTCGGCTCCTCTCAAATGAATCAGCTTACCAGTGTTTGGTGGCATCACAGGTGTGATAACTATCTACGCTTGCGGTTTTCCACCAGGTAACCTTCAGTGATGGAGGTTCGCTGGAGCTCATAAATGTCTCTCCTCAGTGGGGACAGCTCTCTGAAC	Fungi	Basidiomycota	Agaricomycetes	Thelephorales	Thelephoraceae	Tomentella	tomentella-thelephora	gb|JQ791173.1	100	6.15e-89	94.55
OTU786	303_61905|F|ITS2;size=209;	LT978871	ACACCTCAACTCTCATGGCCTTGCCGTGATGAGCTTGGACTCTGGGGGTCTTGCCGGCCTGTGGTCGGCTCCTCTCAAATTGATCAGCTTGCCAGCGTCTGGTGGCATCGCAGGTGTGATAACTATCTACGCTTGTGGTTTTCCACCAGGTAACCTTCAGCGATGGAGGTTCGCTGGAGCTCACAAATGTCTCTCTTCGGTGAGGACAGCTTCTGAAC	Fungi	Basidiomycota	Agaricomycetes	Thelephorales	Thelephoraceae	Tomentella	tomentella-thelephora	emb|HF565112.1	99.54	5.02e-90	94.95
OTU787	303_61963|F|ITS2;size=22;	LT979441	ACACCTCAACTCTCATGGGTTTGCCATGATGAGCTTGGACTCTTGGGGGTTTTGCTGGCCCACCGTCGGCTCCTCTCAAACGAATCAGCTTGCCGGCATTTGGTGGCATCACAGGTGTGATAACTATCTACGCTTGTGGTATTCCACTTGGTAACCTTCAGCGATGGAGGTGTGCTGGAGCTCATAGACGTCTCTCTTCAGCAAGGGACATGTTTTTGAAC	Fungi	Basidiomycota	Agaricomycetes	Thelephorales	Thelephoraceae	Thelephora	tomentella-thelephora	UDB014187	99	6e-106	98.18
OTU788	303_62135|F|ITS2;size=11269;	LT981001	CCCCCCAGCTCAAGCATCCATTTAATGATGCTTGGATTTCTTTGGAGAGGTATCACTTTTTATCAAGAGAAGCCCTCCAGAAATTCATAGGCAGTATGGTTTGCACTGGAACCAGACGTAATAATAATAAAATCGTTTGTTGTGGTATAATCATTGTACTTGCCTTGAAAACACCCATTGATTTTC	Fungi	Ascomycota	Pezizomycetes	Pezizales	Pezizaceae	_	terfezia-peziza	HE814085	100	2e-90	98.92
OTU789	303_62429|F|ITS2;size=346;	LT978872	ACACCTCAACTCTCATGGCTTGCCATGATGAGCTTGGACCTTGGGGGTCTGCTGGCCTGTGAGTCGGCTCCTCTCAAATGAATTAGCCTGCCGGTGTTTGGTGGCGTCACAGGTGTGATAACTATCTACGCTTGTGGCTCTCCACCAGGTAACCTTCAGCAATGGAGGTTCGCCGGAGCTCATAAACGTCTCTCCTTTGTGAGGACAGGTTTTGACC	Fungi	Basidiomycota	Agaricomycetes	Thelephorales	Thelephoraceae	Tomentella	tomentella-thelephora	emb|LN910885.1	100	2.11e-108	100
OTU790	303_63160|F|ITS2;size=1684;	LT978873	ACACCTCAACTCTCATGGTTTGCCGTGATGAGCTTGGACTTTGGGGGTCTTGCTGGCCTGCGGTCAGCTCCTCTAAAATGAATCAGCTTTCCAGTGTTTGGTGGCGTCACAGGTGTGATAACTATCTACGCTTGTGGTTCTCTGCCAGGTAACCTTCAGCGATGGGGGTTCGCTGGGGCTCATAAACGTCCTCTCCTCAGTGAAGACAGCTTTGTGAAC	Fungi	Basidiomycota	Agaricomycetes	Thelephorales	Thelephoraceae	Tomentella	tomentella-thelephora	emb|LN911822.1	100	1.31e-95	96.35
OTU791	303_63894|F|ITS2;size=2566;	LT978874	ACACCTCAACTCTCATGGTTTGCCGTGATGAGCTTGGACTTTGGGGGTCTTGCCGGCATGACCGTCGGCTCCTCTCAAATGAATCAGCTTGCCAGTGTTTGGTGGCGTCACGGGTGTGATAACTATCTACGCTTGTGGTCTTCCATCAGGTTACCTTCAGCAATGGAGGTTCACTGGAGCTTACAGACGTCTCTCCTCAGGGAGGACAGCTTTTTGAAC	Fungi	Basidiomycota	Agaricomycetes	Thelephorales	Thelephoraceae	Tomentella	tomentella-thelephora	emb|LN911874.1	100	1.66e-109	100
OTU792	303_65420|F|ITS2;size=5097;	LT978875	ACACCTCAACTCTCATGGCTTGCCCATGATGAGCTTGGACTTTGGGGGTTTTGCTGGCCTGCAGGTCGGCTCCTCTCAAATGAATCAGCTTGCCAGTGTTTGGTGGCATCACGGGTGTGATAATTATCTACGCTTGTGGTTTTCCACCAGATAACCTTCAGCGATGGAGGTTCGCTGGGGCTCATAAACGTCTCTCCTCGGCGAGGACAGCTCTTTGAAC	Fungi	Basidiomycota	Agaricomycetes	Thelephorales	Thelephoraceae	Tomentella	tomentella-thelephora	emb|FR852183.1	100	2.16e-103	98.19
OTU793	303_65887|F|ITS2;size=479;	LT978876	ACATCTCAACTCTCATGGTTTTCCGTGATGAGCTTGGAACTTTGGAGGTCTTGCTGGCTTGTTTTCAGCTCCTCTTAAATTTATCAGCTTCCCAGTGTTTGGCGGCACCACAGGTGTGATAAATATCTGCACTTGTGGTTGTTTGCCAGATGTGCCCTCTCTTCGTGAAGGGCCTGCTGGAGCTTATAGACGTCTCTCCTTGGTGGAGACAGCTGTTTGAA	Fungi	Basidiomycota	Agaricomycetes	Thelephorales	Thelephoraceae	Tomentella	tomentella-thelephora	UDB016341	100	3e-74	89.59
OTU794	303_66058|F|ITS2;size=141;	LT981002	CCCCCCAACTCAAGCGTCTGTGTAATGATGCTTGGATTTCTTTGGAGAGGTATCACTTTTTATTTAGAGAAGCCCTCCAGAAATTCATAGGCAGCATGGTTTGCACTAGAACCAGACGTAATAATAAGAAAATCGTTTGTTGTAGTATGAGCCTTGTACTTGCCTTGAAAACAAACATTGATTTTC	Fungi	Ascomycota	Pezizomycetes	Pezizales	Pezizaceae	_	terfezia-peziza	HE814085	100	8e-64	90.32
OTU795	303_66434|F|ITS2;size=5459;	LT980255	AATTCTCAACCTCCTTGGTTTCTTTTAGAGACCGATGGGGGCTTGGACATTGGAGGCCTTTGCTGGTGTCTCTCTTGAAGGCCCAGCTCCTCTTAAATGAATTAGCGGGGTCCTCTTTGCCGATCCTTGACATGTGATAAGATGTTTCCGTGTCTTGGTCTCTGGCTCTGTTGCTTTTGGGCCCCGCTTCTAATCGTCTCAACCTTGCATCGAGACAAATGTCTGAGCGTGGCTCCCTTCCCTGGGAAACTCTCTCGACCACACAAAC	Fungi	Basidiomycota	Agaricomycetes	Russulales	Russulaceae	Lactarius	russula-lactarius	KM052571	100	7e-136	99.25
OTU796	303_66489|F|ITS2;size=3219;	LT978877	ACACCTCAACTCTCATGGTTTGCCCATGACGAGCTTGGACTCTGGGGGATTTGCTGGCCTGTGGTCAGCTCCCCTCAAACGAATCAGCTTTCCAGTGTTTGGTGGCATCATGGGTGTGATAAATATCTACGCTTGTGGTTTCCTGCCAGGTAACCTTCAGTAATGGGGGTTCGCTGGGGCTCATAAACGTCTCTCCTCAGTGAAGACAGCTTTGTGAAC	Fungi	Basidiomycota	Agaricomycetes	Thelephorales	Thelephoraceae	Tomentella	tomentella-thelephora	HE814127	100	3e-93	94.98
OTU797	303_66551|F|ITS2;size=5817;	LT978878	ACACCTCAACTCTCATGGTTTGCCATGATGAGCTTGGACTTTGGGGGTCTTGCTGGCCTATGGTCAGCTCCTCTTAAACGAATCAGCTTGCCAGTGTTTGGTGGCATCACAGGTGTGATAACTATCTACGCTTGTGGTTTCCCATCAGGTGACCTTCAGTGATGGAGGTTCACGCTGGGGCTCATAAAGGTCTCTCCTCAGTGAGGACAGCTTTTTGAAC	Fungi	Basidiomycota	Agaricomycetes	Thelephorales	Thelephoraceae	Tomentella	tomentella-thelephora	emb|LN910087.1	100	4.62e-110	100
OTU798	303_66766|F|ITS2;size=4022;	LT978879	ACACCTCAACTCCTCATGGCTTGCCATGATGGGCTTGGACTTTGGAGGTCTTGCCGGCCACCTATGGGTTGGCTCCTCTCAAATGAATTAGCTTGCCAGTGTTTGGTGGCATCACAGGTGTGATAACTATCTACGCTTGTGGTTTTCTGTCAGGTAACCTTCAGCAGTGGAGGTTCACTGGGGCTCATAAACACCATCCTCCCTTCAACCGGGGGACATGTTTTGATT	Fungi	Basidiomycota	Agaricomycetes	Thelephorales	Thelephoraceae	Tomentella	tomentella-thelephora	dbj|LC013813.1	83.77	4.02e-66	91.62
OTU799	303_67650|F|ITS2;size=11714;	LT978880	ACACCTCAACTCTCACGGTCTCCACCGTGATGAGCTTGGACTTTGGAGGTCTTGCTGGTCCGCCGTCAGCTCCTCTCAAATGAATCAGCTTACCAGTGTTTGGTGGCACCCCAGGTGTGATAACTATCTACGCTTGCGGTTTTCCACCAGGTAACCTCCAGCAATGGAGGTTCGCTGGGGCTCACAAACGTCTCTCCTCAGCGAGGACAGCTTTAAC	Fungi	Basidiomycota	Agaricomycetes	Thelephorales	Thelephoraceae	Tomentella	tomentella-thelephora	gb|JQ991879.1	100	2.15e-108	100
OTU800	303_69107|F|ITS2;size=326;	LT978881	ACACCTCAACCCTTGTGGTTTACCACGATTGGCTTGGACTTTGGAGGTTTTGCTGGCCCCTGTGGTCGGCTCCTCTCAAATGAATCAGCTTACCAGCGTTTGGTGGCGTCGCAGGTGTGATAACTATCTACGCTTGTGGCCGTCTGCCATGTAACCTTCAGCGATGAGGGTTCGCTGGGGCTCACAGATGTCTCTCCCGAGTGAAGACAGCTTTTTGATC	Fungi	Basidiomycota	Agaricomycetes	Thelephorales	Thelephoraceae	Tomentella	tomentella-thelephora	gb|JQ991886.1	100	4.72e-95	95.91
OTU801	303_69387|F|ITS2;size=4992;	LT981003	AGAAACTCTCAGGCACGGCTCTTTTGCCAGGCCTGGATCATGTCAGAGAGGCAGGGCACCAGCGGTCGCTCTGCCCTTTGTAAAACCATGGATATTTTGAAGATTTGTTTCATTCCAACGTGATAGAATGTTCCATTCGTTGGTATTGTCAACTTCAGATGTTGCCAAAAGACCCACAAAATTCTTACAT	Fungi	Ascomycota	Pezizomycetes	Pezizales	Pezizaceae	_	marcelleina-peziza	AB571493	99	6e-85	96.81
OTU802	303_69477|F|ITS2;size=7978;	LT978882	ACACCTCAACTCTCATGGCTTGCCATGATGAGCTTGGACTTTGGGGGTCTTGCTGGCCTGTGTAGTCAGCTCCTCTAAAATGAATCAGCTTGCCGGTGTTTGGTGGCGTCACAAGTGTGATAACTATCTACGCTTGTGGTTTCCCACCAGGTAACCTCCAGTGATGGAGGTTCACTGGGGCTCATAAACGTCTTTCCTCTGTAAAGACAGCTCTCTAAAC	Fungi	Basidiomycota	Agaricomycetes	Thelephorales	Thelephoraceae	Tomentella	tomentella-thelephora	gb|KR149773.1	100	1.02e-91	95
OTU803	303_69561|F|ITS2;size=124;	LT980577	ATATATCAATCAACCTTCTCTTGTTGAGCGGTTTGGATGTGGGGGGTTTTGCTGGCCAGCCTCTTAAAAGGTTTCATTCAGCTCTCCTGAAATGCATTAGCGGAAACAACCTCTGTTCATTGGTGTGATAACTATCTACGCTATTGAAAGTGAAGGGAAGTTTGGCTTTCTAACGGTCCTTGGACAAAGCTCATCATTA	Fungi	Basidiomycota	Agaricomycetes	Agaricales	Cortinariaceae	Cortinarius	cortinarius	KC966166	96	9e-64	90.63
OTU804	303_71343|F|ITS2;size=11153;	LT979884	ATGTTCTCAACCTTATTGGTTTCTTTGAGACCAACAAGGCTTGGAGTTTGGAGGTTTTTCTTGCTGGCCTTGTTTTGAAGTCAGCTCCTCCTAAAGGAATTGGTGGGGTCCGCTTTAGCTGATCCTTGACGTGATAAGCATTTGTTCAACGTCATGTCGGCTCGGAACCTGCTTTCTAACCCTAGAGTTACATGTAACTCGACCGTTTTATAAA	Fungi	Basidiomycota	Agaricomycetes	Russulales	Russulaceae	Russula	russula-lactarius	emb|LN909947.1	100	2.29e-103	99.07
OTU805	304_73048|F|ITS2;size=4341;	LT981094	ATATACTCAACCTCTTTGGTTGGATTTGGGGGTTTTGCTGGACTCTTTTCTGAGGTCAGCTCCTCTAAAATGCATTAGCAAAACAGTTCGTCGATCGTTCATTGGTGTGATAATTATCTACGCTATTGACGTGAGAAAGGCAGGTTTAGCTCATAACAGTCCATTGACTTGGACAAGAGACAATTTATTA	Fungi	Basidiomycota	Agaricomycetes	Agaricales	Cortinariaceae	_	cortinarius	JQ991843	100	2e-94	99.47
OTU806	304_73054|F|ITS2;size=449;	LT981059	AACTCTCAAGCAAATATAGCTTTATTGTTATGTTTGTTTGGATCTGGGCTTTGCTGCGTCAATGCAGCTGGTCTTAAATGTATTAGCTGATCCTTATGAGGGATTTGGTTCTACTTGACGTGGTAATTATCTAACGTTGAGGACAGTCTTTTGAGATTGGCCAGAGATATCTTTGGATTGCTTCTAAATTGTTTATTGTCCTTGGACATAATCAGTCAATCAT	Fungi	Basidiomycota	Agaricomycetes	Cantharellales	Hydnaceae	_	cantharellus	EF434018	84	1e-53	87.23
OTU807	304_73361|F|ITS2;size=13038;	LT980478	AATTATCAACTGCTTCAATTTGTTTTGAAGTGAAGTTGGATTTGGAGGTGTTTGCTGGCTTTGTTCAGCTCCTCTCAAAAGCATTAAAACCAATAATGTTGCATGGTGTTGAAGTATCTTTGACGTGATAATTATCTATGTCGTAGAGAAAGCCTTGCTTTTACTTATGGTTTATATTAGCACAATTTTTGTTGTTGCTTTGATCA	Fungi	Basidiomycota	Agaricomycetes	Thelephorales	Bankeraceae	Hydnellum	hydnellum-sarcodon	UDB014154	100	7e-100	98.54
OTU808	304_78997|F|ITS2;size=32;	LT980890	AATATCTCAAAAAGCTTGTGCTTTTTTGGCACAGGAGTTTTGGACATTGGGAGTTGCCGGCTGCTGGATAACAGTGGTGGGCTCTTCTGAAAAGCATTAGTTGAGGAGCTTTGCACTCTATTGGTGTGATAGACTATCTATGCCAGGAGACGCTTCATGATCCTCTGCCATCTTAACCGTCTTTATAAGACAATATGATAA	Fungi	Basidiomycota	Agaricomycetes	Agaricales	Amanitaceae	Amanita	amanita	AB015696	100	2e-100	99.5
OTU809	304_80327|F|ITS2;size=452;	LT978592	AATCCTCAACCGCGCCGATTGATTTCGGTGGGGCTTGGACTTTGGAGCGTGCTGGCGAAGGTCGGCTCCTCTTTAAATGCATCAGCGGAAGAAACCTTTGTCTTTCCTGCCTTCGGTGTGATAATTGTGTTGCGCCGCGGTGGAACTTCAACGATCCGCTTACAACGGTCTTCGGACGAAACCTCATGTCA	Fungi	Basidiomycota	Agaricomycetes	Atheliales	Atheliaceae	Tylospora	amphinema-tylospora	AB848700	100	1e-96	100
OTU810	304_93018|F|ITS2;size=1730;	LT980827	AATTCTCAACCATGTCTAGATTGATTTCGAAGTCATGGCTTGGAGTTGGGATGTTGCTGGCAGCGAAATGCAGTCAGCTGTCCTGAAATGTATTAGCAAAGGTGACCATGCAGATCTTTCTTGGACATGCACGGCCTTCGACGTGATAATGATCGTCGTGGCTGGAGTGTTCAGACATGCACTAAATCATCCTTGCTTCCAATCCTTAACATTGACCACTTTTTGTGGGAGATGTTATTTTTGACA	Fungi	Basidiomycota	Agaricomycetes	Boletales	Boletaceae	Boletus	boletus	dbj|AB973752.1	100	1.08e-91	91.97
OTU811	304_93934|F|ITS2;size=3828;	LT981113	AATTCTCAAGCCTTTAGCTTGGTATTGGGCGATTGCCGTGACCTGATGGGGGGAACGGCTGGCCTTAAACGAATTAGCTGATTCTTGCATGTGGTTGGTTCTACTCGGCGTGATAAATTGTTTGTGATCGCTGAGGACATCTTTATGAGATGGCCAATGCTTGCTTGGATTGCTTCTAACATGGCTTGGGATCTGCATGCCCTGCCTTTCAA	Fungi	Basidiomycota	Agaricomycetes	Cantharellales	Clavulinaceae	_	clavulina	UDB014184	83	6e-51	87.29
OTU812	304_94588|F|ITS2;size=2568;	LT980120	ATTTCTCAACCACCCGATCCTTGTGATCTCGTGGCTTGGACTTGGGAGTTGCTGGTCTTTCCAGATCAGCTCTCCTGAAATGCATTAGCAGAAGTGGTCGAGGCGAGTTTTCGGCGTGCACGGCCTTTGACGTGATAATTCATCGTCATGGCTGGAGCGTCTTTGGACTACGTATTAGACTTTCTTTGCTTCCAACGAAAACCCAGTCAAGCTTAGCTACTAGTACACCCTAGTACGAACGCGGCTTGCATTTCATTTCGAA	Fungi	Basidiomycota	Agaricomycetes	Boletales	Boletaceae	Pulveroboletus	boletus	HE814131	100	2e-125	97.72
OTU813	304_98477|F|ITS2;size=11807;	LT980891	AATATCTCAAAACGCTTGTGCCTTTTTTGGCATGGGATTTTTGGACATTGGGAGTTGCCGGCCACTGATAAAGTGGTGGGCTCTTCTGAAAAGCATTAGTTGAGGAGCTTTGCACTCTATTTGGTGTGATAAACTATCTATGCCAAGAGATGCTTCACGATCCCTCTGCTGTCTAACCGTCTTTATCAGACAATATGATAA	Fungi	Basidiomycota	Agaricomycetes	Agaricales	Amanitaceae	Amanita	amanita	KJ466372	100	4e-87	95.57
OTU814	305_104890|F|ITS2;size=8378;	LT980578	ATATATATTATCAACCATTTCTCTTGTTGAAGTGGTTTGGATGTGGGGGTTTGCTGGCCTTGTTAAAGGGTTCAGCTCTCCTGAAATGCATTAGCAGAACAGCCCTGTTCATTGGTGTGATAACTATCTACGCTATTGAATGTGACGGGAAGTTCAGCTTTCTAACAGTCCTTGGACAATTCATCATTA	Fungi	Basidiomycota	Agaricomycetes	Agaricales	Cortinariaceae	Cortinarius	cortinarius	gb|KJ792492.1	100	1.4e-90	99.47
OTU815	305_115075|F|ITS2;size=5982;	LT979550	GTACTCTCACTCTCCCGATACTTTTGGATCGGGAGTGGTGGACTTGGGTGCTGCTGCTTGACTGTGGCTCGCCTTAAATGAAGTAGTGCAACTCTCGGTTGGACATAGTACGGCGTGATAAGTGTCTTCGCCGGCGCCTCATTCGAGGGTGGCCGATCGGGAGCTCTGTGCTTCCAACTGTCTTCGGACAACATCTGACA	Fungi	Basidiomycota	Agaricomycetes	Sebacinales	Sebacinaceae	Sebacina	sebacina	JF748100	100	3e-98	99
OTU816	305_115430|F|ITS2;size=875;	LT980336	AATTCTCAACCTTTCCAACTTTTATTAGTTTGGTTAGGCTTGGATGTGGGGGTTGCAGGCTTCATTAATGAGGTTGGCTCTCCTTAAATGCATTAGCGGAACTTTTGTGGACCGTCTATTGGTGTGATAATTATCTACACCGTGGATGTGAAGCAGCTTTATGAAGTTCAGCTTCTAACTGTCCATTGACTTGGACAATTTTTTGACA	Fungi	Basidiomycota	Agaricomycetes	Agaricales	Hydnangiaceae	Laccaria	laccaria	gb|JQ991747.1	100	1.06e-101	99.52
OTU817	305_116636|F|ITS2;size=1101;	LT978883	ACACCTCAACTCTCATGGTTTGCCGTGATGAGCTTGGACTCTGGGGGATTTGCTGGCCTGCGGTCGGCTCCCCTCAAATGAATTAGCTTTCCAGTGTTTGGTGGCATCACGGGTGTGATAAATATCTACGCTTGTGGTTTCCTGCCAGGTAACCTTCAGTAATGGGGGTTCGCTGGGGCTCATAAACGTCTCTCCTCAGTGAAGACAGCTTTATGAAT	Fungi	Basidiomycota	Agaricomycetes	Thelephorales	Thelephoraceae	Tomentella	tomentella-thelephora	HE814127	99	6e-101	97.24
OTU818	305_116706|F|ITS2;size=7138;	LT978884	ACACCTCAACCCTCGTGGTTCGCCACGATCGGCTTGGACTTTGGAGGTTTTGCTGGCCCACTCCTGTGGTCGGCTCCTCTCAAATGGATCGGCTTTCCAGTGTTTGGTGGCGTTGCAGGTGTGATAACTATCTACGCTTGTGGCCGTCCACCATGTAACCTTCGGCGACGAGGGTTCACCGGAGCTTACAGATGTCTTCCTGAGCGAAGACGACTTTTTGATC	Fungi	Basidiomycota	Agaricomycetes	Thelephorales	Thelephoraceae	Tomentella	tomentella-thelephora	gb|JQ991888.1	86.1	1.7e-94	100
OTU819	305_117136|F|ITS2;size=9507;	LT979885	AATCATCAAAACCCTTTTCTTTAAGGGATTTTTGGACTTGGAGGTTTCATGCTAGCTTTCAAGCTTTTGAAAGCGAGCTCCTCTCAAATGAATTAGTGGGGTCTGCTTTGCTGGTCCTAGACGTGATAAATATGTTTCTACGTTTTGGATCGAGCACTGTGTCTTTGGACGCCTGCTTCTAACTGTCCCCCTGGACGACGATGGTGCTCCGGTCACCGCCATCTATATTGGTGAGGGGCTGGACCCACAAGAAAAAA	Fungi	Basidiomycota	Agaricomycetes	Russulales	Russulaceae	Russula	russula-lactarius	KM576529	91	2e-96	93.7
OTU820	305_117608|F|ITS2;size=2023;	LT978885	ACACCTCAACCCTTGTGGCTTGCCATGATGGGCTTGGACTTTGGGGGTCTTGTTGGCCTGTGAGCCAGCTCCTCTTAAATGGATTAGCTTGCCGGTGTTTGGTGGCGTCACAGGTGTGATAACTATCTACGCTTGTGGTTTCCCACCAGGTAACCTTCAGCAATGGAGGTTCGCTGGAGCTTATAAATGTCTCTCCTCAGTGAGGACTGATTTTGACC	Fungi	Basidiomycota	Agaricomycetes	Thelephorales	Thelephoraceae	Tomentella	tomentella-thelephora	gb|JQ991896.1	100	5.98e-109	100
OTU821	305_117792|F|ITS2;size=14;	LT978886	ACACCTCAACTCCCGTGGTTCGCCACGGTGAGCTTGGACTCTGGGGGTTTTGCTGGCCTGTGGTCGGCTCCTCTCAAATGAATTAGCCTGCCAGTGTTTGGTGGCGTCACGGGTGTGATAAACTATCTACGCTTGTGGTTTTCCACCAGGTAACCTTCAGCAGTGGAGGTTCACTGGAGCTTACAGATGTCTCTCTTCGATGAGGACAGCCCTTTGAAT	Fungi	Basidiomycota	Agaricomycetes	Thelephorales	Thelephoraceae	Tomentella	tomentella-thelephora	AB507033	100	2e-81	91.52
OTU822	305_118408|F|ITS2;size=4524;	LT978887	ACACCTCAACTCTCATGGTTCGCCGTGATGAGCTTGGACTTTGGAGGCTTTGCTGGTCTTCGATCTGCTCCTCTTGAATGAATCAGCCTGCCAGTGTTTGGTGGCGTCGCAAGTGTGATAACTATCTACCCTTGAGACTGCCTGCCAGGTAACCTTCAGTGATGGAGGTTCGCTGGGGCTCATAGACGTCTCTCCTCAGCGAGGACAGCTTTTTTAAC	Fungi	Basidiomycota	Agaricomycetes	Thelephorales	Thelephoraceae	Tomentella	tomentella-thelephora	UDB018459	98	6e-76	90.65
OTU823	305_118868|F|ITS2;size=5752;	LT979886	AATCATCAAAAACCATTTCTTTTATAGAAAAGGTTTTTGGACTTGGAGGTTTGATGCTTGCTTTTGTCTTTAAAAGCAAGCTCCTCTCAAATGAATTAGTGGGGTCTGCTTTGCTGATCCTTGACGTGATAAGATGTTTCTACGTTTTGGACTTGGCATCGTGCCTGCTTCTAACTGTCTTACGGACAAATGATGGTGCTTTGGTCACTACCAATCCACATTGGTGGGAGGCTGGACCCACAATAAAGAAC	Fungi	Basidiomycota	Agaricomycetes	Russulales	Russulaceae	Russula	russula-lactarius	KP713777	100	4e-128	99.6
OTU824	305_119979|F|ITS2;size=2086;	LT978888	ACACCTCAACTCTCATGGTTTGCCATGATGAGCTTGGACTTTGGGGGTCTTGCTGGTGGAACTGCCGGCTCCTCTCAAATGAATCAGCTTGCCAGTGTTTGGTGGCGTCACAGGTGTGATAACTATCTACGCTTGTGGTCTTCCATCAGGTTACCTTCAGTAATGGAGGTTCACTGGAGCTCACAGACGTCTCTCCTCAGGGAGGACAGCTTTTTAAC	Fungi	Basidiomycota	Agaricomycetes	Thelephorales	Thelephoraceae	Tomentella	tomentella-thelephora	gb|KJ792668.1	99.54	2.14e-98	97.24
OTU825	306_122541|F|ITS2;size=1376;	LT979887	AATCCTCAAAACCTTTTTCTTTGACAAGAAATGGAGTTTTGGACTTGGAGGTTCAATGCTCGCTTTCGATTCCGAAAGCGAGCTCCTCTCAAATGAATCAGTGGGGTCCGCTTTGCTGGTCCTTGACGTGATAAGATGTTTCTACGTTTTGGATCCGGCACTGTCCCTTGGATGCTCGCTTCTAACCGTCTCATAGACATTGCTGGCGCCCCGGTCACCGCCGTTTACATCGGCGGGAGGCTTGGCCCACGACATAAAA	Fungi	Basidiomycota	Agaricomycetes	Russulales	Russulaceae	Russula	russula-lactarius	gb|KJ769296.1	100	2.16e-103	93.46
OTU826	306_123236|F|ITS2;size=399;	LT979551	GTACTCTCACACTCTCTACTCCTTTGGATGTGGGGAGCGGTGGACTTGGGTGTTTGCTGCTTTTCCTTGTGGCTCACCTCAAATGTGTTAGTGTACCTCCTGGTTGGACATAGTACGGCGTGATAAGTGTCTTCGCCGGCACCTCACTAGAGGGTGGTCAATTCAAGGAGCTCTATGCTTTCAAACCGTCTTCGGACACTCTCTGACA	Fungi	Basidiomycota	Agaricomycetes	Sebacinales	Sebacinaceae	Sebacina	sebacina	emb|HE687122.1	100	1.84e-74	91.83
OTU827	306_145685|F|ITS2;size=40699;	LT980828	AATTCTCAACCATGAACTTTGAGATCATGGCTTGGAGTTGGAAGTTGCTGGCCGGAAGGTCAGCTCTTCTTAAACGGATTAGCGATCGAGTTGGCTAGTCTTTGACGTACACGGCCTCGGACGTGATAATGATCGTCCTGGCTGGAGCGTCTTTTTTGTAGACTATGCACACAGATGGCTTCTAATAAGAATGGTCGAGCGAGCTTAGCTATTAGGCAGTCTGCTGTTTGTTAAGGCAAGGCAAGGCTGGCGAACGCAAGCGCAAGCTTGAATTATGGACCATGATCAGCG	Fungi	Basidiomycota	Agaricomycetes	Boletales	Boletaceae	Boletus	boletus	HE814204	100	6e-152	100
OTU828	306_145895|F|ITS2;size=8200;	LT979552	TACTCTCACACTCTATGATCCTTTGGATTCAGGAGTGGTGGACTTGGGTGTTTGCTGCTTTCCTTGTGGCTCACCTCAAATGTGTCAGTGCACCTCTTGGTTGGACATAGTACGGCGTGATAAGTGTCTTCGCCGGCACCTTGCAAGAGGGTGGCCAACTGGGGGCTCTGTGCTTTCAAACCGTCATTTGACAATCTCTGACA	Fungi	Basidiomycota	Agaricomycetes	Sebacinales	Sebacinaceae	Sebacina	sebacina	emb|LN911460.1	100	1.32e-80	94.12
OTU829	306_146414|F|ITS2;size=888;	LT979553	GTACTCTCACACTCCCTCTGGGGAGCGGTGGACTTGGGTGTTTGCTGCTCACCAAGCGGCTCACCTGAAATACATTCGTGCACCTCTTGGTTGGACATAGTACGGCGTGATAAGTGTCTTCGCCGGCACCTCGCAAGAGGGTGGCCAGTCTTGAGCTCTGTGCTTTCAAACCGTCCTCGGACAATGTCTGACA	Fungi	Basidiomycota	Agaricomycetes	Sebacinales	Sebacinaceae	Sebacina	sebacina	emb|LN911865.1	99.48	1.67e-94	100
OTU830	306_153629|F|ITS2;size=5977;	LT980708	TAATCTCAATTCCTTCAGGCATTTTTTGTACAAACAAGAAAAGGCCTGCTCAAGGTAAATTGGATTTGGAGGTTTTCATGCAGGTTCCCCTTTTGTAGGGAATCAGCTCCTCTTAAAAATATTAGCTGGAGGGATAATGCAAAATGGCTTCTTAGCATTGTTCATTGGCTTATGGTGTAATAATTGTTTCATCATGGCCATCAGTGCAAATGGCAAATACAGCCTCCAAAGAGACCTTTGTAGCATTTCTCTGCTTCTAATTTGTCAGATTTATTTGACAACTTCATGTATTCT	Fungi	Basidiomycota	Agaricomycetes	Hymenochaetales	Hymenochaetaceae	Coltriciella	coltricia	KC857266	100	3e-120	93.05
OTU831	306_155172|F|ITS2;size=8063;	LT979554	GTACTCTCACACTCTCTGATCTGTTTGGATTCGGGGAGCGGTGGACTTGGGTGCTTGCTGCTTTCCTTGTGGCTCACCTCAAATGCGTCAGTGCACCTCTTGGTTGGACATAGTACGGCGTGATAAGTGTCTTCGCCGGCACCTCGCAAGAGGGTGGCCGATCGAGAGCTCTGTGCTTTCAAACCGTCTTCGGACAATCTCTGACA	Fungi	Basidiomycota	Agaricomycetes	Sebacinales	Sebacinaceae	Sebacina	sebacina	gb|JQ991832.1	100	2.75e-102	100
OTU832	306_156077|F|ITS2;size=6804;	LT980200	AATTCTCAACCATCCTTTGATTTATTTCGAGGGGTGGCTTGGATCTTGGGAGTTGCTGGCTGATCCTAGTCGGCTCTCCTTAAAAGCATTAGCGAAAGGTGGCAAGCCCTGCATGCACGGCCTTCGACGTGATAATGATCGTCGTGGCTGGAGTGCGAGGCTTGGATCTAATAACCTTTGCTTCTAAACCATCGTAATCGGGGGACTTTTGCTTCGGCGGACGAACCTTTTTACTTTTTCTGACG	Fungi	Basidiomycota	Agaricomycetes	Boletales	Melanogastraceae	Melanogaster	paxillus-gyrodon	emb|AJ555533.1	65.71	2.1e-54	91.18
OTU833	306_160840|F|ITS2;size=1879;	LT979888	ATACTCTCAACCTTCTCGGTTTCTTTGACCACGAAGGCTTGGACTTTGGAGGTTTTTCTTGCTGGCCTCTTTTGAAGCCAGCTCCTCCTAAATGAATGGGTGGGGTCCGCTTTGCTGATCCGCGACGTGATAAGCATTTCTTCTACGTCTCAGTGTCAGCTCGGAACCCGCTTTCCAACCGTCTTTGGAACAAAGACAATGTTCGAGTTGCGACTCGACCTCACAAA	Fungi	Basidiomycota	Agaricomycetes	Russulales	Russulaceae	Russula	russula-lactarius	emb|LN911414.1	100	4.65e-105	97.8
OTU834	306_160930|F|ITS2;size=4;	LT978889	ATACCTCAACCCTCATGGCCTGCCATGATGGGCTTGGACTTTGGGGGTCTTGTTGGCCTGTGAGCCAGCTCCCCTTAAATGAATTAGCTTGCCGGTGTTTGGTGGCGTCACAGGTGTGATAACTATCTACGCTTGTGGTTTCCCACCAGGTAACCTTCAGCAATGGAGGTTCACTGAAGCTCATAAACGTCCTCCCCAGAGAGGACAGATTTTGACT	Fungi	Basidiomycota	Agaricomycetes	Thelephorales	Thelephoraceae	Tomentella	tomentella-thelephora	emb|LN909664.1	99.54	8.28e-98	97.24
OTU835	307_163227|F|ITS2;size=65;	LT980579	TTGTATATCAACCTCTTCAACCTTTGGCTTGTTGAGTGTTGGATGTGGGGGGTTTTGCTGGTTTCTCTCTTGAGGTCAGCTCTCCTGAAATGCATTAGTTGAACAATTTGCAGACCTTGTTCATTGGTGTGATAATTATCTACGCTATTAACAACAAAGCAAGCTCAGCTTCTAACAGTCCATTGACTTGGACAATATCTATATCAA	Fungi	Basidiomycota	Agaricomycetes	Agaricales	Cortinariaceae	Cortinarius	cortinarius	emb|LN910941.1	99.03	1.06e-101	100
OTU836	307_165382|F|ITS2;size=1042;	LT979442	ACACCTCAACTCTCATGGTTTGCCATGATGAGCTTGGACTCTGGGGGTTTTGCTGGCCTGTGGTCAGCTCCCCTCAAATGAATCAGCCTCCCAGTGTTTGGTGGCGTCACGGGTGTGATAAATATCTATGCTCGTGGTTGTCTGCCAGGTAACCTTTGGCAACAAAGGTTTGCTGGAGCTCACAGATGTCGCTCCTCAGCGAGGACAGCTTTTTGAAC	Fungi	Basidiomycota	Agaricomycetes	Thelephorales	Thelephoraceae	Thelephora	tomentella-thelephora	GQ240909	100	3e-108	99.08
OTU837	307_168215|F|ITS2;size=2;	LT978890	ACACCTCAACTCTCACGGTTTGCCGTGATGAGCTTGGACTTTGGAGGTTTTTGCTGGCCCATGGTTGGCTCCTCTCAAACAAATTAGCTTGCCAGTTTTCGGTGGCGTCACAGGTGTGATAACTATCTACGCTCGTGGTCGTCCGCTGGGTAACCTTTCGGTGACGGAGGTTTGCTGGAGCTTATAAATGTCTCTCCTCAGCGAAGACAGCTATTCGAAC	Fungi	Basidiomycota	Agaricomycetes	Thelephorales	Thelephoraceae	Tomentella	tomentella-thelephora	emb|LN909971.1	100	4.68e-100	97.27
OTU838	307_175066|F|ITS2;size=7036;	LT980829	GTATTCTCAACTGTGTGTTTTGACACAGATTGGATTGGTGGAGGTTGCTGGTAGCAAGATGCTATCAGCTCTTCTGAAATATATTAGCAAAGGACAAGCAAACGGCCTTCAATGTGATAATGATCATTGTGGGCTTGGAGCATTTGTTCTAGGCTTTTATAATATGTTGTGCTTACTAGTCAACAAATTGAA	Fungi	Basidiomycota	Agaricomycetes	Boletales	Boletaceae	Boletus	boletus	EU569243	39	5e-21	91.89
OTU839	307_175082|F|ITS2;size=424;	LT980580	ATATATCAACCTCTTCAGCTTTTGTTTGTTGAGTGTTGGATGTGGGGGATCTTTTTGCTGGTCTTTTCAAGGTCAGCTCCCCTAAAATATATTAGCGGAACAATTTGTTGACCGTTCATTGGTGTGATAATTATCTACGCTATCGACGTGAGACAGTTCAGCTTCTAACAGTCCATTGACTTGGACAATTTTTATTA	Fungi	Basidiomycota	Agaricomycetes	Agaricales	Cortinariaceae	Cortinarius	cortinarius	AB848445	100	3e-98	99.49
OTU840	307_175223|F|ITS2;size=478;	LT978891	ACACCTCAACTCTCATGGTTTGCCGTGATGAGCTTGGACTTTGGAGGTCTTGCCGGCATAACTGTCGGCTCCTCTCAAATGAATCAGCTTCCCAGTGTTTGGTGGCGTCACAGGTGTGATAACTATCTACGCTTGTGGTCTTCCATCAGGTTACTTCAGCAATGGAGGTTCACTGGAGCTCACAGACGTCTCTCCTCAGGGAGGACAGCTTTTTGAAC	Fungi	Basidiomycota	Agaricomycetes	Thelephorales	Thelephoraceae	Tomentella	tomentella-thelephora	AB259125	100	2e-111	100
OTU841	307_176959|F|ITS2;size=81;	LT980581	ATATATCAACCTCTTCAGCTTTTGGTTGTTGATTGGTTTGGATGTGGGGGTTGTTTGCTGGCCTCTTAGGATGTCAGCTCCCCTGAAATGCATTAGCGAAACAATTTGTTGATCGTTCAATGGTGTGATAATTATCTACACTATTAATGTGAGACAGTTTAGCTTCTAACAGTCCATTAACTTGGACAATTTTATTTATTA	Fungi	Basidiomycota	Agaricomycetes	Agaricales	Cortinariaceae	Cortinarius	cortinarius	KJ705110	100	3e-73	91.58
OTU842	307_177070|F|ITS2;size=16;	LT979443	ACACCTCAACTCTCATGGTTTGCCATGATGAGCTTGGACTTCTGGGGGTTTTGCTGGCCTGCGGTCGGCTCCTCTCAAATGGATCAGCTTTCCAGTGTTTGGTGGCGCTATGGGTGTGATAACTATCTACGCTTGTGGCCGTCTGCCGGGTAACCTTTGGTGACAGAGGTTTGCTGGAGCTTACAAACGTCTTTCCTCAGCGAAGACAGCTTTTGATC	Fungi	Basidiomycota	Agaricomycetes	Thelephorales	Thelephoraceae	Thelephora	tomentella-thelephora	emb|LN911994.1	100	2.77e-97	96.79
OTU843	307_178673|F|ITS2;size=294;	LT979555	GTACTCTCACACTCTCTTGTCCTTTGGATTTGGGGAGTGGTGGACTTGGGTGTTTGCTGCTTTCCTTGTGGCTCGCCTCAAATGTGGTAGTGCACCTCTTGGTTGGACATAGTACGGCATGATAAGTGTCTTTGCCTGCACCTCGCAAGAGGGGGTGGCCAATCAGGGCTCTGTGCTTCAAACTGTCTTCAGACAATCTCTGACA	Fungi	Basidiomycota	Agaricomycetes	Sebacinales	Sebacinaceae	Sebacina	sebacina	emb|FR852353.1	100	1.03e-71	91.3
OTU844	307_179368|F|ITS2;size=90;	LT978892	ACACCTCAACTCTCATGGTTTGCCATGATGAGCTTGGACTCTGGGGGTCTTGCTGGCCTTATGGTCAGCTCCTCTCAAATGAATCAGCTTCCCAGTGTTTGGTGGCATCACAGGTGTGATAACTATCTACGCTTGTGGTGTCCTCCCAGGTAACCTTCAGCGATGGAGGTCACTGGAGCTAATAAATGCACATCTCTCATCGTAGAGATGGCTTTTTAGAT	Fungi	Basidiomycota	Agaricomycetes	Thelephorales	Thelephoraceae	Tomentella	tomentella-thelephora	gb|JQ991892.1	100	2.73e-107	99.1
OTU845	307_179701|F|ITS2;size=576;	LT980892	ATATCTCAAAATGCTTTACTTTATAAAGTCAAGTGTTTTTGGATTTTGGGAGTTTATTGCTGGCTTGTCTGTCAGCTCTCCTTAAAAGTATTAGCTTTTTGGCACTTCTCTTTTTAACTGGTATGATAGTTATCTATGCCTGTAAAGTGAGAAGTGTAAAGCCTGTAAATATCCTGTAACA	Fungi	Basidiomycota	Agaricomycetes	Agaricales	Amanitaceae	Amanita	amanita	JX844733	82	4e-67	97.97
OTU846	307_182420|F|ITS2;size=742;	LT980582	ATATATCAACCTCTTCAGCTTTTGCTTGTTGAGTGTTGGATGTGGGGGGTCTTTTGTTGGTCTTTTAAAAGAGATCAGCTCCCCTAAAATGTATTAGCAGAACAATTTGTTGACCGCTCATTAGTGTGATAATTATCTACGCTATTGATCTAAGGCAGTTCAGCTTCTAACAGTCCATTGACTTGGACAATTTTTCATTA	Fungi	Basidiomycota	Agaricomycetes	Agaricales	Cortinariaceae	Cortinarius	cortinarius	gb|JQ991691.1	100	6.4e-99	100
OTU847	307_183048|F|ITS2;size=90;	LT980583	ATATATCAACCTCTTCAAGCTTTGTTGAGTGTTGGATGTGGGGGAATTTTTGCTGGACTCTCTGAGGTCAGCTCCCCTAAAATACATTAGCAAAACAATTTGTTTACTGCTCATTGGTGTGATAATTATCTACGCTATTGACGGTAAATTGCAGTTTAGCTTCTAACGGTCCATTGATTTGGACAACCCTTTTATTA	Fungi	Basidiomycota	Agaricomycetes	Agaricales	Cortinariaceae	Cortinarius	cortinarius	gb|KM226488.1	88.83	4.48e-61	91.71
OTU848	308_183401|F|ITS2;size=293;	LT980921	ACAATAATTTCACTAATAAATGTGGTATTGGCCAATGTGAGTCTAGCACTTTGCTGTGCTGGTCTCACTTGGCTGAAATGGATAGGCCAGAGAAAGTACAACTTGGCAACAGACTCTCAGAGTGTTTTTGAACGCTAAACTAGTCTTGTCACATGTTGAAATCTGCGCTTAAGGACCCCCCTTTCAGTCCAAACTGAAGA	Fungi	Ascomycota	Pezizomycetes	Pezizales	Tuberaceae	_	tuber-helvella	JX987751	100	1e-96	98.5
OTU849	308_183466|F|ITS2;size=2079;	LT979556	GTACTCTCACACTTCCGATCTTCGGATCGGGAGTGGTGGACTTGGGTGTTGCTGCTTCATTGTGGCTCACCTCAAATGGATTAGTGCAACTCTTGGTTGGACATAGTACGGCGTGATAAGTGTCTTCGCCGGCACCTCGTAATAGAGGGTGGCCGATCGGGAGCTCTGTGCTTTCAAACCGTCTTCGGACAACAGCTGACA	Fungi	Basidiomycota	Agaricomycetes	Sebacinales	Sebacinaceae	Sebacina	sebacina	emb|LN910194.1	95.02	4.74e-80	95.81
OTU850	308_183569|F|ITS2;size=104;	LT978893	ACACCTCAACTCCCGTGGTTCGCCACGGTGAGCTTGGACTCTGGGGGTTTTGCTGGCCTGTGGTCGGCTCCTCTCAAATGAATTAGCCTGCCAGTGTTTGGTGGCGTCACGGGTGTGATAAATATCTACGCTTGCGATTGCCCACCAGGTAACCTTCAGCAATGAGGGTTCACTGGGGCTCATAGACGTCTCTCCCTCAGCGAGGACAGTTTTTAAC	Fungi	Basidiomycota	Agaricomycetes	Thelephorales	Thelephoraceae	Tomentella	tomentella-thelephora	emb|LN911207.1	100	4.72e-95	96.31
OTU851	308_184082|F|ITS2;size=5;	LT979557	TACTCTCACACTCTCTGATCCTTTGGATTCGGGGAGCGGTGGACTTGGGCGTTTGCTGCTTTGCTTGTGGCTCGCCTCAAATGCGTCAGTGCACCTCTCGGTTGGACATAGTACGGCGTGATAAGTGTCTTCGCCGGCACCTCGAAAGAGGGTGGCCGATTGGGAGCTCTGTGCTTTCAAACCGTCTTCGGACAATCTCTGACA	Fungi	Basidiomycota	Agaricomycetes	Sebacinales	Sebacinaceae	Sebacina	sebacina	emb|LN909607.1	100	3.64e-86	95.59
OTU852	308_184983|F|ITS2;size=17;	LT981127	AAATCCTCAAGATAAAATCTTCCGTTCATTCGATTGGTTTTATTTTGGACTTTGGAGGTCTTGCAGATTCCCATGTCTGCTCCTCTCAAATGCATTAGCTGGATCTCCATGAAGCCTTGGTTCCACTTGGCGTGATAAATAATCACTCGCTGAGGACACTGTAAAAAGTGGCCAGGTTCCACAGATGAACTGCTTCCAACCCGTCCTTTAGGTAGGACAGTTGAACTTTTATG	Fungi	Basidiomycota	Agaricomycetes	Cantharellales	Ceratobasidiaceae	_	ceratobasidium2	gb|KP715602.1	74.25	3.54e-50	89.02
OTU853	308_186358|F|ITS2;size=7;	LT978894	ACACCTCAACTCTTCATGGTTTTCTATGATGAGCTTGGACTTTGGGGGGTTTTTGCTGGCCCTATGGTCGGCTCCTCTAAAATGAATCAGCTTGCCAGTGTTTGGTGGGCATCACGGGTGTGATAAACTATCTACGCTTGTGGTTTTCCACCAGGTAACCTTCAGCAATGGGGGTTCGCTGGGGCTCATAGACGTCTCTTTCAAC	Fungi	Basidiomycota	Agaricomycetes	Thelephorales	Thelephoraceae	Tomentella	tomentella-thelephora	AB507033	99	1e-87	95.57
OTU854	308_195467|F|ITS2;size=160;	LT978895	ACACCTCAACTCCCATGGTTTGCCATGGTGAGCTTGGACTTTGGGGGTTTTGCTGGCCCATGGCCAGCTCCTCTCAAATGAATTAGCCTGCCAGTGTTTGGTGGCATCACAGGTGTGATAAATATCTACGCTTGCGATTGCCCACCAGGTAACCTTCAGCAATGGGGGTTCGCTGGGGCTCATAGACGTCTCTTTCAAC	Fungi	Basidiomycota	Agaricomycetes	Thelephorales	Thelephoraceae	Tomentella	tomentella-thelephora	emb|LN911353.1	96.98	4.75e-90	98.45
OTU855	308_195843|F|ITS2;size=68;	LT978896	ACACCTCAACTCCCATGGTTTGCCATGGTGAGCTTGGACTTTGGAGGTTTTGCTGGCCCATGGTCAGCTCCTCTCAAATGAATTAGCCTGCCAGTGTTTGGTGGCATCACGGGTGTGATAAATATCTACGCTTGCGATTGCCCACCAGGTAACCTTCAGCAATGGGGGTTCGCTGGGGCTCATAGACGTCTCTCCCTTGGCGAGGACAGTTTTTTAAC	Fungi	Basidiomycota	Agaricomycetes	Thelephorales	Thelephoraceae	Tomentella	tomentella-thelephora	GQ900537	100	7e-105	98.17
OTU856	308_196182|F|ITS2;size=5444;	LT980709	TGATCTCAATTCCCCCTCAGGCTTTATTTTGAAATATAAATGAAGGCCTGTTCAGGGTTATTGGATTTGGAGGTTTTCATGCAGGTTCCTTTTTGTAAGGGAATCAGCTCCTCTTAAAAATATTAGCTGGAGGATGAAGCAAAAATATAGGCTCAGCATTGTTCAATTGGCTTTATGGTGTAATAATTATTTCATCATGTGCTATACAGTGCATGGGAAAATATAGTCCCAAGGAGGCTTTTTGTAGCATTCTCTGCTTCTAGTTTTGTCAGGTCTTATCTGGCAATTCATGTATTCTT	Fungi	Basidiomycota	Agaricomycetes	Hymenochaetales	Hymenochaetaceae	Coltriciella	coltricia	AM412252	100	2e-151	99
OTU857	308_197183|F|ITS2;size=163;	LT978897	ACACCTCAACTCTCATGGCTTGCCATGATGGGCTTGGACTCTGGGGGTTTTGCTGGCCCTGCGGTCGGCTCCTCCCAAATGCATCAGCTTGCCAGTGTTTGGTGGCATCACAGGTGTGATAAAATCTACGCTTGTGGTTGCCTGCCAAGTAACCTTCAGAGATGAAGGTTTGCTGGGGCTTCAAAACGTCTCGGCAGAGACAGCTTCTTGAAC	Fungi	Basidiomycota	Agaricomycetes	Thelephorales	Thelephoraceae	Tomentella	tomentella-thelephora	gb|GQ268675.1	100	3.7e-86	94.39
OTU858	308_198751|F|ITS2;size=17;	LT980937	ACATCCTCAACTCTCACGGCTTGCCGTGATGAGCTTGGACTTTGGAGGGCCTTGCTGGCTTGCAGCCAGCTCCTCTCAAATGAATCAGCTTTACCGGTGTTCGGTGGCGTCACAGGTGTGATAACTATCTACGCTTGTGGCTTTCCACCGGGTAACCTTCATCACTGAAGGTTTTTGCTGGGGCTCATAAATGTCTCTCCTCGGTGAAGACAGCTCTTTGAAC	Fungi	Basidiomycota	Agaricomycetes	Thelephorales	Thelephoraceae	_	tomentella-thelephora	UDB013781	100	1e-77	90.27
OTU859	308_201427|F|ITS2;size=100;	LT978898	ACACCTCAACCCTCATGGTTTGCCATGTGGGCTTGGACTTTGGGGGTCTTGCTGGATTGTAGTCAGCTCCCCTTAAATGAATCAGCTTGCCAGTGTCTGGTGGCATCACAGGTGTGATAATTATCTACGCTTGTGGTTTTACATCAGGTAACCTTCAGAGATGGGGGTTCACTGGGGCTTACAAAATGTCTCTCCTCGGTGAGGACAGCTCTTTGAAT	Fungi	Basidiomycota	Agaricomycetes	Thelephorales	Thelephoraceae	Tomentella	tomentella-thelephora	emb|LN909741.1	100	2.73e-107	99.54
OTU860	308_201770|F|ITS2;size=2227;	LT980938	ACACCCTCAACCCTTGTGGTTTGCCACAATCGGCTTGGACTTTGGAGGTCTTGCTGGCTCCGGTCGGCTCCTCTCAAATGAATCAGCTCACCGGTGTTTGGTGGTGTTGCAGGTGTGATAACTATCTACGCTTGCAGTCATCCTCCATGCAACCCTCAGCGATGAGGGTTCACTGGGGCTCATAGATGTCTCTCCTGAGCAAAGACAGCTCTTTGAAC	Fungi	Basidiomycota	Agaricomycetes	Thelephorales	Thelephoraceae	_	tomentella-thelephora	gb|KF225791.1	100	7.04e-104	98.62
OTU861	308_202197|F|ITS2;size=16;	LT978899	ACACCTCAACTCCCATGGTTCGCCATGGTGAGCTTGGACTTTGGGGGTTTTGCCGGCCCATGGTCGGCTCCTCTCAAATGAATTAGCCTGCCAGTGTTTGGTGGCATCACAGGTGTGATAAATATCTACGCTTGCGATTGCCCACCAGGTAACCTTCAGCAATGAGGGTTCACTGGGGCTCATAGACGTCTCTTTCAAC	Fungi	Basidiomycota	Agaricomycetes	Thelephorales	Thelephoraceae	Tomentella	tomentella-thelephora	emb|LN911207.1	96.98	1.02e-91	98.96
OTU862	308_202873|F|ITS2;size=195;	LT981004	AGCTATTTATTTCAAGTCTTTGTGAAAATCAAAGAGTTGAGGATTTTTAGGGAAGTAATATTTTCTTTGGAGATATTACTCCTTATAAATGCTTTCACAGTTTTATTTTTCAATTTTAAAATGTAATACAATAATATAAAATCATTTAAAAATTAAAATAATACTTGTGATAAAAATTAACTTGTAGGAAAAACTG	Fungi	Ascomycota	Pezizomycetes	Pezizales	Pezizaceae	_	pachyphloeus-amylascus	AJ969438	100	1e-76	91
OTU863	309_202992|F|ITS2;size=844;	LT980710	TAATCTCAATTCCCCCTCAGGCTTTTCTTTTGAAATACAAATGAAAGGCCTGTTCAGGGTCAATTGGATTTGGAGGTTTCATGCAGGTTTCCCCTCTTTGTAAGGGAAATCAGCTCCTCTTAAAAATATTAGCTGGAGGATTGAAGCAAAATGGCTCAGCATTGTTCATTGGCTTTTATGGTGTAATAATTGTTTCATCATGCGCTATACAGTGCACGGGAAAATACAGTCCCGGGAGACTTTTTGTAGCATTCTCTGCTTTCTAGTTTTGTCAAGTCTATCTGGCAATTCATGTATTCTT	Fungi	Basidiomycota	Agaricomycetes	Hymenochaetales	Hymenochaetaceae	Coltriciella	coltricia	gb|JQ991688.1	99.34	1.06e-106	90.88
OTU864	309_203057|F|ITS2;size=1362;	LT980711	TAATCTCAATTCCCCTCAGGCTTTTCTTTTGAAATACAAATGAAAGGCCTGTTCAGGGTCATTGGATTTGGAGGTTTCATGCAGGTTCCCCTCTTTGTAAGGGAAATCAGCTCCTCTTAAAAATATTAGCTTGGAGGATGAAGCAAAATGACTCAGCATTGTTCATTGGCTTTTATGGTGTAATAATTGTTTCATCATGCGCTATACAGTGCACGGGAAAATACAGTCCCGGGAGACTTTTTGTAGCATTCTCTGCTTTCTAGTTTTGTCAGGTCTATCTGGCAATTCATGTATTCTT	Fungi	Basidiomycota	Agaricomycetes	Hymenochaetales	Hymenochaetaceae	Coltriciella	coltricia	AM412252	99	1e-108	90.85
OTU865	309_204291|F|ITS2;size=6;	LT980893	TAAATTATCAAAGTCACCTTGATGAATTGTTGGGGTGGTTTTGGAAGTGGGAGATGCAGGTCTTGTGGTATGTTATGGGACCAGCTATCCTGAAATATATTAGCAGAGTCAGGTGGAGCTTTTTACTGGTGTAATAAGAATAAATATTGTCACCGAAAAAAGAGAAAGCGACATGTGTTGAATTGAAGTCTGCTGTTTTGTCGTCCGTGTGGACAAGTTAATTA	Fungi	Basidiomycota	Agaricomycetes	Agaricales	Amanitaceae	Amanita	amanita	AB015686	100	2e-95	95.15
OTU866	309_213830|F|ITS2;size=3414;	LT978611	ATAATAATTTCACCGATAAATGTGGTATTGGTCAATGTGAGTCTAGCACTTTGCTGGGCTGGTCTCACTCGGCTGAAATGGATAGGCCAGAGAAACTACAACTTGGCAACAGACTCTCAGAGTGTTTTTGAATGCTAAACTAGTCTTGTTACATGTTGAAATCTGCGCTTAAGGACCCCCCTTTTAGTCCAAACTTAAGA	Fungi	Ascomycota	Pezizomycetes	Pezizales	Tuberaceae	Tuber	tuber-helvella	KF744063	90	7e-60	89.94
OTU867	31_742235|F|ITS2;size=970;	LT980256	AAATCTCAAACCTCCTTTGGTTTTCTTCTGGAGACAAAAGGAGGCTTTGGACTCTGGAGGCCTTTGCCGGCGTCTTCTCTCTTTTGAAGAAGGCCAGCTCCTCTGAAATGAATTAGCGGGGTCCTCTTTGCCGACCCTCGACATGTGATAAGATGTTTCCGTGTCTTGGCTTCTGGCTCTGTTGCCTTTGGGACCCGCTTCTAACCGTCTTGACTCCATGTCAAAGACAATGTTCGAGCTCGTCTCCCTTCTCGGGAAACGTTCTTGACCCCACGAAC	Fungi	Basidiomycota	Agaricomycetes	Russulales	Russulaceae	Lactarius	russula-lactarius	AF096979	100	2e-122	95.34
OTU868	31_742390|F|ITS2;size=707;	LT980257	AAACCTCAACCTCCCCGGTTTCTTCTGGACACCGAAGGAGGCTTGGACTTTGGAGGCCTTTGCTGGTGTCTCTCTTTTGAAACCCAGCTCCTCTTAAATGAATTAGCGGGGTCCTCATTGCCGATCCTTGACGTGTGATAAGATGTTTCCATGTCTTGGTTTCTGGCTCTGTTGCCTTTGGGACCTGCTTCTAACCGTCTCAACCTCACATCGAGACAACGTTTGAGCGTGTCTCCCTTCTCGGGAAACTCTCTCAACCCCACGAAC	Fungi	Basidiomycota	Agaricomycetes	Russulales	Russulaceae	Lactarius	russula-lactarius	AB848538	100	1e-138	100
OTU869	310_217521|F|ITS2;size=10587;	LT980767	AAATTCTCAAAGCAAATTCTTTTGTTAATTCAATTGGTTTACTTTGGATTTGGAGGTTTTGCAGATTTCTACAATCTGCTCCTCTTGAATGTATTAGCTGGATCTCAGTATATACTTGGTTCCACTCAGTGTGATAAGTATCACTCACTGAGGACACCTGTAAAAAAGGTGGCCAAGGAATACAGATGAACTGCTTCTAAGAGTCTATTAGG	Fungi	Basidiomycota	Agaricomycetes	Cantharellales	Ceratobasidiaceae	Ceratobasidium	ceratobasidium1	gb|JQ991676.1	99.06	3.28e-87	95.26
OTU870	310_224528|F|ITS2;size=615;	LT980800	GAATTCTCAAATCCAGGTTTCCCTTGGGTTTGGACTTTGGGAGTCTTTGCGGGCTTTTCCCTTCCCCTTCGAGGGGGAGGAGAAGGTCGGCTCTCCTGAAATGCATTAGCTCGTGGGTTGCGATCCTCGCATGGCACGGCCTCCTCGGCGTCGTAATGATCGTCGTGGGCTGGAAGTGTGACCGTGCTGCGAGCTTATAATCTCCGTGAGCTTCCTTCGGAAGCCCACTCCCGTGGT	Fungi	Basidiomycota	Agaricomycetes	Boletales	Calostomataceae	Calostoma	pisolithus-scleroderma	EU718094	99	8e-105	95.82
OTU871	310_234620|F|ITS2;size=5373;	LT980258	AAATCTCAACCTTCTCGGTTTCTTCTGGACACCGAAGGAGGCTTGGACTTTGGAGGCCTTTGCTGGCATCCCTTCTTCTTTTGAAGGCCAGCTCCTCTCAAATGAATTAGTGGGGTCCTCTTTGCCGATCCTCGACGTGTGATAATATGTTTCCATGTCTTGGTTTAATGGCTCTGTTGCCTTTGGGACCTGCTTCTAACCGTCTTGACGACAACGAGGTTCGAGGGTGTCTCCTCCCCTTCTCGGGGGGAAAGAGATGCTCTGGAACCCAACGAAAC	Fungi	Basidiomycota	Agaricomycetes	Russulales	Russulaceae	Lactarius	russula-lactarius	KF432965	100	4e-143	99.64
OTU872	310_234723|F|ITS2;size=4708;	LT980259	AAATCTCAACCTCCTCGGTTTCTTTTGAAAGCCAAAGGAGGCTTGGACTTTGGAGGGCTTTGCTGGACTCGAAAAGGCCAGCTCCTCTCAAATGAATTAGCGAGGTCCCCTTTGCCGATCCTCGACGTGTGATAAGATGCTTCCACGTCTCGGTCTTTGGCTCTGTCGAATCTTGGGACCTGCTTCCAATCGTCTCTCTACGAGACAACGTTCGAGCTCGCCTCGACCACGTAC	Fungi	Basidiomycota	Agaricomycetes	Russulales	Russulaceae	Lactarius	russula-lactarius	KF432961	100	2e-110	97.44
OTU873	310_236807|F|ITS2;size=1508;	LT980260	AATTCTCAACCTCCTCGGTTTCTTTTGGACGCCGAAGGAGGCTTGGACTTTGGAGGGCTTTGCTGGACTTCAAAGGCCAGCTCCTCTCAAATGAATTAGCGAGGTTCCCTTTGCCGATCCTCGACGTGTGATAAGATGCTTCCACGTCTCGGTCTTTGGCTCTGTCGCCTTTTGGGACCTGCTTCCAATCGTCTCTTGATTGAGACAACGTTCGAGCTCGTCTCGACCACGTAC	Fungi	Basidiomycota	Agaricomycetes	Russulales	Russulaceae	Lactarius	russula-lactarius	emb|LN911532.1	100	7.62e-118	100
OTU874	310_236891|F|ITS2;size=158;	LT979558	GTACTCTCACTCTCTCTAATCATTTAGATTGGGAGTGGTGGACTTGGGTGTTGCTGCTTCACTGTGGCTTACCTCAAATGCGTCAGTGCAACTCTCAGTTGGACATAGTACGGCGTGATAAGTATCTTCGCCGGCACCTCGCAAGAGGGTGGCCACTTGGGGGCTCTGTGCTTTCAAACCGTCTTCGGACAATCTCTGACA	Fungi	Basidiomycota	Agaricomycetes	Sebacinales	Sebacinaceae	Sebacina	sebacina	gb|KC986265.1	100	1.11e-71	91.67
OTU875	310_238914|F|ITS2;size=1692;	LT979559	GTACTCTCACACTCTCCAATTCGGATTGGGGAGCGGTGGACTTGGGTGTTGCTGCTTTACTGTGGCTCACCTCAAATGAGTTAGTGCAACTCCTGATTGGACATAGTACGGCGTGATAAGTATCTTCGCCGGCACCTCAGAAGAGGGTGGCTAATCGGGAGCTCTGTGCTTCAAACCGTCTTTGGACAATCTCTGACA	Fungi	Basidiomycota	Agaricomycetes	Sebacinales	Sebacinaceae	Sebacina	sebacina	AB848592	100	4e-87	95.59
OTU876	310_239404|F|ITS2;size=1219;	LT980261	AAATCTCAACCTCCTTGGTTTCTTTTGAACGCCAAAGGAGGCTTGGACTTTGGAGGGCTTTGCTGGACTTGTAAAAGGGCCAGCTCCTCTCAAATGAATTAGCGAGGTCCCCTTTGCCGATCCTCGACGTGTGATAAGTTGCTTCCACGTCTCGATCTTTGGCTCTGTCGCCTCTTGGGACCTGCTTCCAATCGTCTCTCTACGAGACAACGTTCGAGCTTGCCTCGACCACGTAC	Fungi	Basidiomycota	Agaricomycetes	Russulales	Russulaceae	Lactarius	russula-lactarius	HE814191	100	2e-121	100
OTU877	310_240621|F|ITS2;size=3129;	LT979560	TACTCTCACACTCCTAATTGCTTTGGATTGGGAGCGGTGGACTTGGGTGCTGCTGCTTGACCGTGGCTCACCTGAAATATGTTAGTGCACCTCCTGGTTGGACATAGTACGGCGTGATAAGTGTCTTCGCCGGCTCCTCGCAACGAGGGTGGCCGATCGGGAGCTCTGTGCTTCAAACTGTCTTCGGACAATCTTCTGGCG	Fungi	Basidiomycota	Agaricomycetes	Sebacinales	Sebacinaceae	Sebacina	sebacina	emb|LN911711.1	100	1.66e-99	100
OTU878	311_244731|F|ITS2;size=13037;	LT978596	CATCTATCAACCATGGCCTTGATTGACTTCGAGAACATGGCTTGGAGTTTGGGGGCCTGCTGGCGGACCTCGGTCGTCAGCTCTCCTGAAATGTATTAGCGATAGTCGAGCATAATGGGTCCCTAACATGCACGGCCTTTTTCGACGTGATAATGATCGTCGTCGGGGCTGGAGTGGTTTGGATTCACGAAGTTTCGCTTCCAATCCCTAGTGCTGTTTTCATTAACACACGTTTTCGAAC	Fungi	Basidiomycota	Agaricomycetes	Boletales	Boletaceae	Tylopilus	boletus	KM975485	100	3e-124	100
OTU879	311_244773|F|ITS2;size=54;	LT978570	AATTCTCAACCATCATTTCTCTTTCTCTTTAAGAGAGATATATGGCTTGGAGTTGGGGGTTGCTGGCAGGAAACTGTCAGCTCTCCTTAAATGTATTAGCGATCAAGTTGGCTAGTCTTTGACATGCACGGCTTCTGATGTGATAATGATCGTCATGGCTGGAGTGTCTTTCCTAGACTATGTACACAAGATAGCTTCTAATTTAAATAAATTTGGGAAGAAAAAAGAGAGGGGAGAGTTCTATCAAGCTTAGCTACTAGGCAGTCTGACCATCCAGGCTGGCGAACACAAGCAAATGACTTGACCCTTTCCTTGATATTTCCTTATCTTCATTG	Fungi	Basidiomycota	Agaricomycetes	Boletales	Boletaceae	Xerocomus	boletus	gb|JQ991918.1	54.63	1.73e-69	93.48
OTU880	311_244898|F|ITS2;size=16;	LT979561	GTACTCTCACACTCTCTGATCCTTTGCGTTCGGGGAGCGGTGGACTTGGGTGTTTGCTGCCTTTCCTGGTGGCTCACCTCAAATGCGTCAGTGCACCTCTTGGTTGGACATAGTACGGCGTGATAAGTGTCTTCGCCGGCACCTCGCGAGAGGGTGGCCGATCGAGAGCTCTGTGCTCTCTAACCGTCTTCGGACAAATTATCTGACA	Fungi	Basidiomycota	Agaricomycetes	Sebacinales	Sebacinaceae	Sebacina	sebacina	AB972836	100	5e-96	97.12
OTU881	311_248508|F|ITS2;size=10614;	LT978571	AATTCTCAACCATTCTCTTTTAAGAGAGAGACATGGCTTGGAGTTGGGAGTTGCTGGCAGGAAACTGTCAGCTCTCCTTAAATATATTAGCGATCGAGTTGACTAGTCTTTGACATGCACGGCCTCTGACGTGATAATGATCGTCATGGCTGGAATGTCTTTCCTGGACTATGTACACAGATGGCTTCTAATTTACATTTTGAAAGAAAGGGAAGAGTTTAGCTACTAGGCAGTCTAACTATGTATTTAGGCTGGCGAACGCGAGCTTGATCTTTCTTTCTCTATCTTCATTG	Fungi	Basidiomycota	Agaricomycetes	Boletales	Boletaceae	Xerocomus	boletus	JF273511	100	5e-128	95.22
OTU882	312_249030|F|ITS2;size=11;	LT981005	CCCCCAAACTCAAGCATCCATTGAATGATGCTTGGATTTCTTTAGAGAGGTATCACTTTGTATTCAGCGACGCCCTCCAGAAATTCATAGGCAGTATGGTTTGCACTAGAACCAGAGGTAATAATAATAAAATCGTTTGTTGTGGTATAAGCATTCTAGTTTCCTTGAAAACACCCATAGATTTTG	Fungi	Ascomycota	Pezizomycetes	Pezizales	Pezizaceae	_	terfezia-peziza	HE814085	99	3e-63	90.27
OTU883	312_249335|F|ITS2;size=12818;	LT979889	AATTCTCAAAATCCCTTTTCTTCTGGAAAAGGTTTTTTGGACTTGGAGGTTCAATGCTCGCCTTCACCTTTGAAGGTGAGCTCCTCTCAAATGAATTAGTGGGGTCTGCTCTGCCGGTCCTTGACGTGATAAAATGTTTCTACGTTTTGGATTTGGCACTGTCTCTTGGACCCCTGCTCCTAACCGTCTCATGGACAAATGATGGTGCTTCTTCGGTCACCGCCGTTGGCGGGAGGCTGGGCCCACGGAAAAAC	Fungi	Basidiomycota	Agaricomycetes	Russulales	Russulaceae	Russula	russula-lactarius	emb|LN909843.1	100	1.67e-104	94.49
OTU884	312_250464|F|ITS2;size=8765;	LT980366	AAGCTTCTCAAACTGCAACTAGTTTTATCTAGCTGTGGCTTGGATATGGGGGTTTTGTTTTTGCAGGCTTCAAATAATGAAGTCTGCTCCCCTGAAAAGTATTAGTGGTCTCTGAGCAGAGAAAACGGTGTGATAAACTATCTATGCCTTAGTACTTTGCAAAGAACTGCTTCTAACATATATAACTTTGACAA	Fungi	Basidiomycota	Agaricomycetes	Agaricales	Inocybaceae	Inocybe	inocybe	UDB017671	91	2e-64	92.09
OTU885	312_262148|F|ITS2;size=2196;	LT980894	AGTATCTCAAAAGCTTATGCCTAGCGTGGGACTTTTGGACTATGGGAGTTGCCGGTCACTGATGAAAGTGGCGGGCTCTTCTGAAAAGTATTAGTTGAGGAGCTTTGCACTCTATTGGTGTGATAGACTATCTATGCCAGGAGATGCTTTATGATCCTCTGCTGTCTAACCGTCTTTATTGGACAAACATGATGA	Fungi	Basidiomycota	Agaricomycetes	Agaricales	Amanitaceae	Amanita	amanita	emb|LN910038.1	100	1.83e-79	94.55
OTU886	312_262613|F|ITS2;size=1741;	LT980895	AAGTATCTCAAAAGCCCTATGCACTATGCAGGGAACTTTTGGACATTGGGAGTTGCTGGTCACTGATAAAGTGGTTGGCTCTTCTGAAAAGCATTAGTTGAGGAACTTTTTGTACTCTACTGGTGTGATAGACTATCTATGCCAGGAGAAGCATTATGAAGCCTCTGCTGTCTAACAGTCCATAATGGACAAGATGATAA	Fungi	Basidiomycota	Agaricomycetes	Agaricales	Amanitaceae	Amanita	amanita	gb|JQ991627.1	100	6.4e-99	100
OTU887	312_262709|F|ITS2;size=971;	LT979562	TACTCTCACACTTCTGATTCCTTTGGGATTTGGGAGCGGTGGACTTGGGTGTTGCTGCTTGAGTTGTGGCTCACCTCAAATACGTTAGTGCAACTCTTGGTTGGACATAGTACGGCGTGATAAGTGTCTTCGCCGGCGCCTCCTTGCAAGGAGGGTGGCCGATTGGGAGCTCTGTGCTTCAAACTGTCTTCGGACACTCTTTGACA	Fungi	Basidiomycota	Agaricomycetes	Sebacinales	Sebacinaceae	Sebacina	sebacina	UDB013780	100	7e-100	98.54
OTU888	313_271375|F|ITS2;size=9469;	LT981044	AAAAGTTCTCAACCATGCTGGTTCTTTCTGGTGTGGCTTGGATTTGAGGGGATTTTTTGCAGGCTTTTCAAGTCGGCTCCCTTGAAAATGATTAGCAGTATCTGAGCATACTTGAGGTGTGATTAAGCGTCTATGCCTTGGTGTATGTGAGATTGTTGCTTTATCAGATGGGTTGGATTGGGTT	Fungi	Basidiomycota	Agaricomycetes	Agaricales	Inocybaceae	_	inocybe	UDB007437	59	3e-28	87.72
OTU889	313_271470|F|ITS2;size=331;	LT980584	ATATATATATCAACCACTTCTTGTTGAGTGGCTTGGATGTGGGGGTGTTTGCTGGCCTTGTTGAAGGGTCAGCTCCCCTGAAATTCATTAGCAGAACCAACCTGTTCAATGGTGTGATAACTATCTACGCTATTTGAAAGGGTAAGGCAGTTCAGCTTCCTAACCGTCCTTTTGGACAAATTTATCTACTT	Fungi	Basidiomycota	Agaricomycetes	Agaricales	Cortinariaceae	Cortinarius	cortinarius	UDB013280	99	1e-82	95.83
OTU890	313_274370|F|ITS2;size=9999;	LT980585	ATATATATATATATCAACCAGTCTTCTCGAGTGGTTTGGATGTGGGGGGTTTGCTGGCCTTTACAAAGGGTCCAGCTCTCCTGAAATGCATTAGCGGAACAACCTGTTCATTCATTGGTGTGATAACTATCTACGCTATTGAGTGTGAGGCAGTTCAGCTTCCTAACAGTCCCTTGGACGATTCATCATTTT	Fungi	Basidiomycota	Agaricomycetes	Agaricales	Cortinariaceae	Cortinarius	cortinarius	JQ906746	97	2e-69	92.51
OTU891	313_274654|F|ITS2;size=745;	LT980586	ATATATATATCAACCTCTCTTGTTGAGTGGTTTGGATGTGGGGGTTTGCTGGCCTGTTCAGCTCCTCTGAAATACATTAGCGGAACAACCTGTTCATTGGTGTGATAACTATCTACGCTATTGAATGTGAGGTGCAGTTCAGCTTTCTAACGGTCCTTGGACAATTTACCATTT	Fungi	Basidiomycota	Agaricomycetes	Agaricales	Cortinariaceae	Cortinarius	cortinarius	GU180278	99	6e-75	95.98
OTU892	313_274676|F|ITS2;size=878;	LT980587	ATATATCAACCTTCTCTTGTTGAGTTGTTTGGATGTGGGGGTTTGCTGGCCTCTTTTAAAAGGTTTTTAGCTCCCCTGAAATGCATTAGCAGAAACAGCCCTGTTCATTGGTGTGATAACTATCTACGCTATTGAATGTGAAGGGCAGTTTGGCTTTCTAACGGTCCTTGGACAGCTCATCATTA	Fungi	Basidiomycota	Agaricomycetes	Agaricales	Cortinariaceae	Cortinarius	cortinarius	HQ446012	100	2e-89	98.92
OTU893	313_274730|F|ITS2;size=591;	LT980588	ATATATCAACCTCTTCAGCTTTTTGCACGTTGAGTGTTGGATATGGGGGTATTTTTTGCTGGACTCTATCTGAGGTCAGCTCCCCTAAAATGCATCAGCGAAACAATTTGTTTACCGCTCATTGGTGTGATAACTATCTACGCTGTTGACGGTGACGCATGTTTAGCTTCTAACAGTCCATTAACTTGGACAACTTTTTATTA	Fungi	Basidiomycota	Agaricomycetes	Agaricales	Cortinariaceae	Cortinarius	cortinarius	emb|LN912249.1	100	6.4e-99	99.51
OTU894	314_280164|F|ITS2;size=678;	LT978900	ACACCTCAACTCCCATGGTTCGCCATGGCGAGCTTGGACTTTGGGGGTTTTGCTGGCCCATGGTCGGCTCCTCTCAAATGAATCAGCCTGCCAGTGTTTGGTGGCATCACAGGTGTGATAAATATCTACGCTTGCGATTGCCCACCAGGTAACCTTCAGCAATGAGGGTTCACTGGGGCTCATAGACGTCTCTCCCTCAGCGAGGACAGTTTTTAAC	Fungi	Basidiomycota	Agaricomycetes	Thelephorales	Thelephoraceae	Tomentella	tomentella-thelephora	emb|LN911207.1	100	2.16e-103	98.62
OTU895	314_291076|F|ITS2;size=637;	LT981006	CCCCCCAACTCAAGCATGCATTTAATGATGCTTGGATATCTTTGGAGAGGTATCACTTTTTAATTGAGAGAAGCCCTCCAGAAATTCATAGGCAGTATGGTTTGCACTAGAACCAGACGTAATAATAATAAAATCGTTTGTTGTAGTATAGTCATTGTACTTGCCTTGAAAACACCCATTGATTTTC	Fungi	Ascomycota	Pezizomycetes	Pezizales	Pezizaceae	_	terfezia-peziza	HE814085	100	2e-75	94.12
OTU896	314_292321|F|ITS2;size=416;	LT978901	ACACCTCAACTCTCATGGCTTGCCATGATGAGCTTGGACTTTGGAGGTCTTGCTGGCCTGTGGTCGGCTCCTCTCAAATGAATCAGCTTGCCAGTGTTTGGTGGCATCACAAGTGTGATAACTATCTACGCTTATGATTTTCCATCAGGTAACTTTCAGTGATGGAGGTTCGCTGGGGCTCATAGATGTCTCTCTTCGGTGGAGACAGCTCTTTGGAC	Fungi	Basidiomycota	Agaricomycetes	Thelephorales	Thelephoraceae	Tomentella	tomentella-thelephora	emb|LN912088.1	100	6.49e-89	94.5
OTU897	314_292702|F|ITS2;size=1360;	LT978902	ACACCTCAACTCTCATGGTTTGCCATGATGAGCTTGGACTTTGGAGGGTCTTGCTGGCCTGTGGTCAGCTCCTCTCAAATGAATCAGCTTGCCAGTGTTTGGTGGCATCACAGGTGTGATAAATATCTACGCTTGTGGTTTTCTGCCAGGTAACCTTTGGCAACAGAGGTTCATTGGAGCTCATAAACGTCTCTCCTCAGTGAGGACAGCTCTTTGAAT	Fungi	Basidiomycota	Agaricomycetes	Thelephorales	Thelephoraceae	Tomentella	tomentella-thelephora	emb|LN912363.1	100	1.4e-90	94.98
OTU898	314_294968|F|ITS2;size=243;	LT979890	ATATTCTCAACCTTCTTGGTTTCTTTGACCACGAAGGCTTGGACTTTGGAGGTTTTTCTTGCTGGCCTCTTTTGAAGCCAGCTCCTCCTAAATAAATGGGTGGGGTCCGCTTTGCTGATCCTCGACGTTGATAAGCATTTCTTCTACGTCTCAGTGTCAGCTCGGAACCCGCTTTCCAACCGTCTTTGGACAAAGACAATGTTCGAGTTGTGACTCGACCTCACAAA	Fungi	Basidiomycota	Agaricomycetes	Russulales	Russulaceae	Russula	russula-lactarius	emb|LN911414.1	100	1e-106	98.24
OTU899	314_296207|F|ITS2;size=10732;	LT979891	AATTATCAAAACCTTTTTCTTTGATCCTTTTTGGTCTGGAAAAGGACTTTTGGACTTGGAGGTTCAATGCTCGCTTTTGCCTTTGAAAGTGAGCTCCTCTCAAATGAATTAGTGGGGTCCGCTTTGCTGATCCTTGACGTGATAAGATGTTTCTACGTTTTGGATTTGGCATTGTCCCTTGGATGTCCGCTCCTAACCGTCTCATGGACGATGATGGTGCTCCGGTCACTGCCATTTACGTTGGCGGGAGGCTGGGCCCACAAAATA	Fungi	Basidiomycota	Agaricomycetes	Russulales	Russulaceae	Russula	russula-lactarius	AB848562	99	3e-105	92.83
OTU900	314_296588|F|ITS2;size=2934;	LT978903	ACTCTTCAACTCGTTATGGCTTGCCATGATGAGCTTGGACCTTGGGGGTCTTGCTGGCTTTGCAGTCAGCTCCTCTCAAATGAATTAGCTTCCCAGCGTTTGGTTGGCATCACAGGTGTGATAACTGTCTGCGCTTGTGGTTTCTGCCAGATGACCCTTGGTTTAAAAGGGGGTTTGCTGGGGCTCATAAATGTCTCTCTTCAATGGGGACAGCTATTTGAAC	Fungi	Basidiomycota	Agaricomycetes	Thelephorales	Thelephoraceae	Tomentella	tomentella-thelephora	gb|JQ991897.1	99.1	3.85e-96	95.96
OTU901	314_297509|F|ITS2;size=2605;	LT979892	ACACCCTCAACCTTTTCTTGGTTTATCATCAAAACTGGGGAAGGGCTTGGACTTTGGATGTTGCTGGCCTCGCCAGCTCGTCCTAAATGAATTAGTGGGGTCCGCCGTGCCGATCCTCGACGTGTTAAGTACGCTTCTACGTCTTGGGGTTTCGCACCGTTACCCGCTTCCAACCTTTTATAATAAATAAAC	Fungi	Basidiomycota	Agaricomycetes	Russulales	Russulaceae	Russula	russula-lactarius	gb|JQ991796.1	100	1.7e-94	100
OTU902	314_299512|F|ITS2;size=138;	LT979563	GTACTCTCACTCTCTCTAATTCTTTCGATTTGGGGAGTGGTGGACTTGGGTGCTTGCTGCTTTCCTTGTGGCTCACCTCAAATATGTCAGTACACCTCTTGGTGGTACATAGTACGGCGTGATAAGTGTCTTCGCCGGCACCTCGCAAGAGGGTGGACAATCAGGAGCTCTGTGCTTCAAACTGTCTTTGGACAATCTTTGACA	Fungi	Basidiomycota	Agaricomycetes	Sebacinales	Sebacinaceae	Sebacina	sebacina	UDB004043	98	3e-73	91.54
OTU903	315_300986|F|ITS2;size=4904;	LT981114	CATTCTCAAGCTGGATGCTTTTTTCTTTTAAAAAGTTTTATCCTAGCTTGGTTTTGGGCATTGCGGTGCCCCCTTTATTGGGGAACCGCTGGCCTTAAAAGTATTAGCTGGCCCTCGTGTGGGATTGGTTATCCTCAGCGTGATAATAATTTGTGACTGCTGGGGACATCTTTCAGGATGGCCAAGTTCCGCTCAAGGGTTGCTTCTAATCTGTGGTTTCTATATTCTTTGAATATGGTCCCCACTTGCTCACAA	Fungi	Basidiomycota	Agaricomycetes	Cantharellales	Clavulinaceae	_	clavulina	FJ454901	100	2e-130	99.61
OTU904	315_301078|F|ITS2;size=127;	LT981007	AGAAACTCTCAGGCACGGCTTTTTTGCCAGGCCTGGATCATGTCAGAGAGGCAGGTGACCTGCGGTCGCTCTGCCCTTTGTAAAACCATGGATATTTTGAAGATTTGTTTCATTCCAACGTGATAGAATGTTTCATTCGTTGGTATTGTCAACTTCAGATGTTGCCATAAGACCCACAAAATTCATACGT	Fungi	Ascomycota	Pezizomycetes	Pezizales	Pezizaceae	_	marcelleina-peziza	AB571493	100	1e-87	97.37
OTU905	315_301151|F|ITS2;size=755;	LT981176	CAACCCTCAGGCCTTAGCTAGCCTGGCGTTGGGGCATCTGTAGTTGACTACAGGCCCTAAAAGTTAGTGGCGGTGTCCGCTAGCACTCCGGGCGCAGTAAATTTCTTTCTCGCCTTGGATGTCTTGCAGTTTACCAGCCGTAAAATATATATATATATATTCAAAATATAAAA	Fungi	Ascomycota	Sordariomycetes	Sordariales	_	_	sordariales1	AB218173	75	8e-54	96.12
OTU906	315_301386|F|ITS2;size=58;	LT979893	ACATCCTTCAACCTTTCTTGGTTTCTTGATCAAGAAAGGCTTGGACTTTGGAGGTTTTAATTGCTGGCCTCCCTCGAAGCCAGCTCCTCCTAAATGGATTAGTGGGGTCTGCTTTGCCGAACCTTGACGTGATAAGATGTTTCTACGTCTTGGGTTTTGCACTGTTGCCCTGCTTCCAATCGTCTTGCATTCAGGACAGAGTCATGAA	Fungi	Basidiomycota	Agaricomycetes	Russulales	Russulaceae	Russula	russula-lactarius	AB451977	100	5e-91	95.67
OTU907	315_311339|F|ITS2;size=193;	LT978904	ACACCTCAACTCTCGTGGTTTACCATGATGAGCTTGGACTTTGGAGGTCTTGCTGGCCGGTGGCCAGCTCCTCTCAAATGAATCAGCTTGCCAGTGTTTGGTGGCATCACGGGTGTGATAACTATCTACGCTTGTGGTTTTTCACCAGGTAACCTCCAGTGATGGGGGTTCGCTGGAGCTCACAAACGTCTCTCCTTGCGAGGACGATTTCTGAAC	Fungi	Basidiomycota	Agaricomycetes	Thelephorales	Thelephoraceae	Tomentella	tomentella-thelephora	gb|JQ711963.1	99.54	3.73e-81	92.66
OTU908	315_311839|F|ITS2;size=13;	LT978905	ACATCTCAACTCTCGTGGTTTCCCATGACGAGATTGGACTTTGGGGGTTTTGTTGGCTTATGTTCAGCTCCCCTTGAATTTATTAGCTTCCCAGTGTTTGGTGGCATCACAGGTGTGATAAATATCTACGCTTGTGGTTGTTTGCCAGATCTGTCCTCTCCTCGTGGAGGGCTCGCTGGAGCTCATAGATGTCTCCTTGGTGGAGACGGTTGTTTGAA	Fungi	Basidiomycota	Agaricomycetes	Thelephorales	Thelephoraceae	Tomentella	tomentella-thelephora	gb|KT272111.1	100	1.09e-81	92.27
OTU909	315_312685|F|ITS2;size=224;	LT978906	ACACCTCAACTCTCATGGTTTGCCGTGATGAGCTTGGACTTTGGGGGTTTTGCCGGCCGTGCGGTCAGCTCCTCTAAAATTAATCAGCTTGCCAGTGTTTGGTGGCGCCGCAGGTGTGATAACCGTCTACGCTTGTGGTCGTCTGCCAGGTGACCTTCGGTTACGGAGGTTTGCTGGAGCTTCCAAATGTCTCTCCTTAGCGAAGACAGCTTCTCGATC	Fungi	Basidiomycota	Agaricomycetes	Thelephorales	Thelephoraceae	Tomentella	tomentella-thelephora	gb|KP783472.1	100	8.58e-73	89.95
OTU910	315_314777|F|ITS2;size=16;	LT978907	ACACCTCAACCCTCGTGGTTTGCCACGATCGGCTTGGACTTTGGAGGTTTTGCTGGCTCCGGTTGGCTCCTCTCAAATGAATCAGCTTACCAGTGTTTGGTGGCGTCGCAGGTGTGATAACTATCTACGCTTGTGGCCGTCCGCCATGCAACCTTCAGCGATGAGGGTTCGCTGGAGCTCACAGATGTCTCTCCTGAGTGAAGACAGCTCTTTGAAC	Fungi	Basidiomycota	Agaricomycetes	Thelephorales	Thelephoraceae	Tomentella	tomentella-thelephora	dbj|AB854722.1	100	2.84e-92	95.46
OTU911	315_316152|F|ITS2;size=2;	LT978908	ACACCTCAACTCTCATGGTTTACCATGATGAGCTTGGACTTTGGAGGTCTTGCTGGCTGGTGGCCAGCTCCTCTCAAATGAATCAGCTTGCCAGTGTTTGGTGGCATCATGGGTGTGATAACTATCTACGCTTGTGGTTTTTCACCAGGTAACCTCCAGTGATGGAGGTTCGCTGGAGCTCATAGACGTCTCTTTCAAC	Fungi	Basidiomycota	Agaricomycetes	Thelephorales	Thelephoraceae	Tomentella	tomentella-thelephora	gb|JQ711963.1	96.98	5.13e-75	93.81
OTU912	315_316475|F|ITS2;size=329;	LT979444	ACACCTCAACTCTCACGGTTTGCCGTGACGAGCTTGGACTTTGGGGGCTTTGCCGGCCTGTGGTTGGCTCCTCTCAAACGAATCAGCTTGCCAGCGTTTTGGCGGCGTCACGGGTGTGATAACTATCTACGCTCGCGATCGTCTGCCGAGTGACCTTCAGTGATGGAGGTTCGCTGAAGCTTACAAACGTCTCTCCTCGGCGAAGACAGCTTTTTGAAC	Fungi	Basidiomycota	Agaricomycetes	Thelephorales	Thelephoraceae	Thelephora	tomentella-thelephora	gb|KC702665.1	100	1.73e-79	91.82
OTU913	315_317457|F|ITS2;size=12311;	LT980853	AAATCTCAAATCCCGGTCCGGGGGTTTGGACTTTGGGAGTCTGCCGGCGACCCGACCTCGGGACGTCGGCTCTCCTCAAATGCATTAGCGGTGGGCGCGAGCCTTTGCACGGCACGGCCTGTTTTCGACGTCGTAGTGATCGTCGCGGGCTGGAAGTGCTCGGATCGACATGTCTCATGCTTCCAAGCTAGTATAAATGATTAAG	Fungi	Basidiomycota	Agaricomycetes	Boletales	Diplocystidiaceae	Astraeus	pisolithus-scleroderma	AB985500	100	2e-104	100
OTU914	315_317560|F|ITS2;size=4767;	LT978909	ACACCTCAACTCTCACAGTTTGCTGTGAAGAGCTTGGACTTTGGGGGTTTTGCTGGCCTGAGGTCGGCTCCTCTCAAATGAATCAGCTTGCCAGTGTTTGGTGGCATCACAGGTGTGATAACTATCTACGCTTGTGGTTGTCTGCCAGGTGACCTTCAGTGATGGAGGTCCGCTGGAGCTTACAAATGTCTTCCCTGAGCGAAGACGGTTTTTCGAAC	Fungi	Basidiomycota	Agaricomycetes	Thelephorales	Thelephoraceae	Tomentella	tomentella-thelephora	dbj|AB831851.1	100	8.12e-73	90
OTU915	316_318610|F|ITS2;size=112;	LT979564	GTACTCTCACACTCTCTGATCCTTTGGATGTGGGGAGCGGTGGACTTGGGTGGTTGCTGCTTTCCTTGTGGCTCACCTCAAATGTGTCAGTGCACCTCTTGGTTGGACATAGTACGGCGTGATAAGTATCTTTGCCGGCACCTCTTAAATGTGAGAGGGTGGTCAGCCAGGAGCTCTGTGCTTTCAAACCGTCTTCGGACACTGTCTGACA	Fungi	Basidiomycota	Agaricomycetes	Sebacinales	Sebacinaceae	Sebacina	sebacina	gb|GQ268664.1	100	4.77e-75	91.94
OTU916	316_341641|F|ITS2;size=3;	LT980367	AAAGTTCTCAACCCTCATGTCAATGTGATGGATTGGACTGTTGGGATTTGCAGGCTTTTTTAAAAAAGGTCTGCTTTTCTGAAATGAATCAGTGGTGTCTGAGCAATGAGGGGACCACTACAGGTTGTATTTATGCCTCCTGTAAAAATCTCTGTTGCCCAAGCTGCTTTAACAAAAATTATCAATGACA	Fungi	Basidiomycota	Agaricomycetes	Agaricales	Inocybaceae	Inocybe	inocybe	FN550890	100	5e-61	89.69
OTU917	316_347260|F|ITS2;size=8766;	LT979894	ATTTCTCAAACCTTCTTGGTTTCTCGATCAAGAAGGCTTTGGACTTTGGAGGTCTTTGCCGGCTTTGTGAAAAGTCGGCTCCTCTTAAATGCATTAGTGGGGTCCCCTTTGCCGATCTCTAGGCGTTGATAATACACTTCTACGTCTTGGGATTTGCTCTGTTCTTTGGGAACCTGCTTCTAACCGTCTCCGTCGGAGACATCGTTCGAGCTTGCTCGACACACGAA	Fungi	Basidiomycota	Agaricomycetes	Russulales	Russulaceae	Russula	russula-lactarius	HE814133	100	8e-105	96.93
OTU918	316_347987|F|ITS2;size=8279;	LT980262	AAACCTCAACCTCCATGGTTTCTTCCGGGGACCAAAGGAGGCTTGGACTTTGGAGGTTTTTGCTGGTGTCTTTGAAGGCCAGCTCCTCTTAAATGAATTAGCGGGGTCCTCTTTGCCGATCCTGGACATGTGATAAGATGCTTCCGTGTCTTGGTTTCTGGCTCTGCTGCCTTTGGGACCCGCTTCCAATCGTCTTGACCTTGCGTCGAGACCATGTTCGAGCCCGTCTCCCTTCTTGGGAAACCCTCTCGACCCCACGCAC	Fungi	Basidiomycota	Agaricomycetes	Russulales	Russulaceae	Lactarius	russula-lactarius	KF432985	99	1e-112	94.98
OTU919	316_348510|F|ITS2;size=15;	LT980768	AAATTCTCAAAGTAAATTCTTTTGTTAATTCAATTGGTTTACTTTGGATTTGGAGGCTTTGCAGATTTTACAATCTCTGCTCCTCTTGAATGTATTAGCTGGATCTCGGTATATACTTGGTTCCACTCAGTGTGATAAGTATCACTCGCTGAGCAAGGAATACAGATGAACCGCTTCTAATAGTCTATAAAAAATTTCAAG	Fungi	Basidiomycota	Agaricomycetes	Cantharellales	Ceratobasidiaceae	Ceratobasidium	ceratobasidium1	gb|JQ991677.1	100	5.49e-85	95.57
OTU920	316_349623|F|ITS2;size=3688;	LT981008	AGAAACTCTCAGGCACGGCTTTTTTGCCAGGCCTGGATCATGTCAGAGAGGCAGGTGACCAGCGGTCGCTCTGCCCTTTGTAAAACCATGGATATTTTGAAGATTTGTTACATTCCAACGTGATAGAATGTTTGATTCGTTGGTATTGTCAACTTCAGATGTTGCCAAAAGACCCACAAAATTCTTATGT	Fungi	Ascomycota	Pezizomycetes	Pezizales	Pezizaceae	_	marcelleina-peziza	AB571493	98	1e-87	97.86
OTU921	317_388795|F|ITS2;size=2906;	LT980263	AAATCTCAACCTCCTTGGTTTCTTCTAGAGACCAAAGGTGGCTTGGACTTTGGAGGCCTTTGCTGGCACCTCTCTCCAGCTCCTCTTGAATGAATTAGCGGGGTCCTCTTTGCCGACCCTTGACATGTGATAAGATGTTTCCATGTCTTGGTTTCTGGCTCTGTTGCCTTTGGGACCCGCTTCAAACCGTCTCAACTTGAGAGACAATGTTCGAGCCTGTCTCCCTTCTTGGGAGACCCCTCTCGGCCCCACGAAC	Fungi	Basidiomycota	Agaricomycetes	Russulales	Russulaceae	Lactarius	russula-lactarius	KF432976	100	2e-105	93.75
OTU922	317_389672|F|ITS2;size=7635;	LT980264	AAACCTCAACCTCCTTGGTTTCTTCTTGAGACCAAAGCAGGCTTGGACTTTGGAGGCCTCTGCTGGCCACCCTCTTTTCAGGAGGCCAGCTCCTCTTAAACAAATTAGCAGGGTCCTCTTTGCCGATCCTTGACGTGTGATAAGATGTTTCCATGTCTTGGTTTCTGGCTCTGTCACTCTTGGGACCTGCTTCTAACTGTCAGGACCTTGCGTCGAGACAACGCTCGAGCATGTCTTCCCTTTCTCGGGAAGCTCCCCTCGACCTCACAAAC	Fungi	Basidiomycota	Agaricomycetes	Russulales	Russulaceae	Lactarius	russula-lactarius	emb|FR852027.1	100	5.98e-109	93.77
OTU923	318_398729|F|ITS2;size=37;	LT980265	AAATCTCAACCTCCTCGGCTTCTTTTGAACGCCGAAGGAAGGCTTGGACTTTGGAGGGCTTTGCTGGACTTGAAAAAAGGCCAGCTCCTCTCAAATGAATTAGCGAGGTCCCCTTTGCCGATCCTCGACGTGTGATAAGACGCTTCCACGTCTCGGTCTTTGGCTCTGTCGAATCTTGGGATCTGCTTCCAATCGTCTCTCTACGAGACAACGTTCGAGCTCGCCTCGACCACGTAC	Fungi	Basidiomycota	Agaricomycetes	Russulales	Russulaceae	Lactarius	russula-lactarius	KF432961	100	6e-106	96.2
OTU924	318_398780|F|ITS2;size=22414;	LT980589	ATATATATCAACCTCTTCTTGTTGAGTGGTTTGGATGTGGGGGTTTTGCTGGCCTCTTGAAAGGGTCAGCTCCTCTGAAATGCATTAGCAGAACGACCTGTTCATTGGTGTGATAAACTATCTACGCTATTGAATGGTGAAGGCAGTTCAGCTTCCTAACAGTCCTTGGACAATTTATCATTA	Fungi	Basidiomycota	Agaricomycetes	Agaricales	Cortinariaceae	Cortinarius	cortinarius	FR852005	99	5e-81	96.7
OTU925	318_399352|F|ITS2;size=47;	LT979565	GTACTCTCACACTCTCCGATCCTGTGGATTTGGGGAGCGGTGGACTTGGGTGCTTGCTGCTTTCCTTGTGGCTCACCTCAAATGCGTCAGTGCATCTCTTGGTTGGACATAGTACGGCGTGATAAGTGTCTTCGCCGGCGCCTCATCATAAGAGGGTGGCCAATTGGGAGCTCTGTGCTTTCCAACCGTCTCCGGACACTCTCTGACA	Fungi	Basidiomycota	Agaricomycetes	Sebacinales	Sebacinaceae	Sebacina	sebacina	emb|LN909912.1	99.52	1.78e-99	99.03
OTU926	318_400691|F|ITS2;size=7;	LT979895	ACATCCTTCAACCTTTCTTAGTTTGTTAACCAAGAAAGGCTTGGACTTTGGGGGTTTTTCATTGCTGGCCTCTGTTGAAGCCAGCTCCTCCTAAATGAATTAGTAGGGTCTGCTTTGCTGATCCTTGACGTGATAAGATGTTTCTACGTCTTGGGTCTTGCACTTTAGACCTCGCTTCTAACCATGTTGCGTTATGAA	Fungi	Basidiomycota	Agaricomycetes	Russulales	Russulaceae	Russula	russula-lactarius	UDB013288	83	7e-65	93.94
OTU927	318_408761|F|ITS2;size=828;	LT979896	AATCCTCAAAACCCCTTTTCTTTGACAAGGAAACGAGTTTTGGACTTGGAGGTTCAATGCTCGCTTTTGATTCCGAAAGCGAGCTCCTCTCAAATGAATCAGTGGGGTCCGCTTTGCTGGTCCTTGACGTGATAAGATGTTTCTACGTTTTGGATCCGGCACTGTCCCTTGGATGCTCGCTTCAAACCGTCTCATAGACATTGATGGTGCCCCGGTCACCGCCGTTTACATCGGCCGGAGGCTTGGCCCACGACACAAAA	Fungi	Basidiomycota	Agaricomycetes	Russulales	Russulaceae	Russula	russula-lactarius	gb|KJ769296.1	100	1.01e-96	91.95
OTU928	318_410441|F|ITS2;size=3314;	LT980266	AAATCTCAACCTCCTTGGTTTCTTCTGAACACCAAAGGAGGCTTGGACTTTGGAGGCCTTTGCTGGTACCTCTCTATTTTGAAGGCCAGCTCCTCTTAAATGAATTAGCGGGGTCCTCTTTGCCAGTCCTCGACGTGTGATAAGATGTTTCCATGTCTTGGCTTCTGGCTCTGTTGCTTTTGGGACCCGCTTCTAACCGTCTCAACCTTGCATAGAGACAACGTTCGAGCATGTTCTCCCTTCTCGGGAAACACTCTCGACCCCACGAAC	Fungi	Basidiomycota	Agaricomycetes	Russulales	Russulaceae	Lactarius	russula-lactarius	AB509880	100	5e-137	99.26
OTU929	318_411044|F|ITS2;size=3;	LT981252	AAAACTTCTCAACTGCTCCAATGTTTTTTGTTGGATGTGGCTTGGAAATGGGGGATTTTGCTGCAGGTTTAATCTGCTCCCCTGAAACATATTAGTGGTGTCTGGGCAAGACTATCCATAGGTGTGATAAAATTATCAAAGCCTTGGGTATATCTGCCTGCTGCTTCCAATTTAAATTGACCA	Fungi	Basidiomycota	Agaricomycetes	Agaricales	_	_	inocybe	HQ604560	92.9	2e-34	82
OTU930	318_411257|F|ITS2;size=1223;	LT979897	AATCATCAAAACCCATTTCTTCTTATAGAAAAGGATTTTGGACTTGGAGGTTTGATGCTTGCTTTTGTCTTCAAAAGTGAGCTCCTCTTAAATAAATTAGTGGGGTCTGCTTTGCTGATCCTTGACGTGATAAGATGTTTCTACGTTTTGGACTTGGCATCGTGCCTGCTTCTAACTGTCTTATGGACAAATGATGGTGCTCCGGTCACTGCCAATTCACATTGGTGGGAGGCTAGACCCACGAAAAAGAAC	Fungi	Basidiomycota	Agaricomycetes	Russulales	Russulaceae	Russula	russula-lactarius	HE814104	100	5e-127	99.21
OTU931	319_413330|F|ITS2;size=627;	LT979898	AAATCTCAAAAACCCCTTTTCCATTTCGAAAAAGGATTTTTGGACTTGGAGGTTCAATGCTTGCTTTTAAAAGCGAGCTCCTCTTAAATAAATTAGTGGGGTCCGCTTTGCCGATCCTTGACGTGATAAGATATTTCTACGTTTTGGATTTGGCACTGTCTTTTGGACGTTCGCTTCTAACCGTCTTAAGGACGAATGATGGTGCTTCGGTCACCGCCATATACATTGGCGGGAGGCTGGACCCACAATAAAAC	Fungi	Basidiomycota	Agaricomycetes	Russulales	Russulaceae	Russula	russula-lactarius	gb|AY061690.1	88.58	2.47e-77	90.48
OTU932	319_413430|F|ITS2;size=125;	LT981115	AATTATCAGATTGAAGATACTTTCTTGTCATCGAGAAAGTCATCTCAGTTTGGTGTTGGGCTCTGCCGTGTTCTTTATTTGGAACGGCTGGCCTTAAAAGCATTAGCTGGCCCTCCTGAGCGTTGGTTCTACTCAGCGTGATAATAATCTGACCGCTGAGGACATCTTCTATGATGGCCAATTCTTGTTTGGGTTGCTTCGAATTTTGGGTTATGGACTTTTGCCAGTCTGTTCCATTTCTAA	Fungi	Basidiomycota	Agaricomycetes	Cantharellales	Clavulinaceae	_	clavulina	AB848424	100	1e-83	89.8
OTU933	319_416180|F|ITS2;size=1028;	LT979566	GTACTCTCACACTCTCCGATCCTGTGGATTTGGGGAGCGGTGGACTTGGGTGCTTGCTGCTTTTCCTTGTAGCTCACCTCAAATGCGTCAGTGCATCTCTTAGTTGGACATAGTACGGCGTGATAAGTGTCTTCGCCGGCGCCTCATAATAAGAGGGTGGCCAATTGGGAGCTCTGTGCTTTCAAACCGTCTTCGGACACTTATTGACA	Fungi	Basidiomycota	Agaricomycetes	Sebacinales	Sebacinaceae	Sebacina	sebacina	emb|LN911276.1	99.52	2.13e-103	100
OTU934	319_428384|F|ITS2;size=30182;	LT981253	AAATCCTCAAGCCCCTCCCCAGTATGGGCTTGGATTTGGGAGGGTTTTTGCAGGCTTTGTTGTCTGCTCTCCTAAAAAGCATTAGCGGTGTCTGAAACGGAAACCGTCAGAGGACGTGATAAATGTCTGTGTCCTTGGTATGCCGTGATTGAAAGCCGCTTCCTAACCTTTTGGAATTTGAAAA	Fungi	Basidiomycota	Agaricomycetes	Agaricales	_	_	inocybe	FJ827200	78.8	1e-30	82
OTU935	319_428775|F|ITS2;size=4176;	LT978910	ACACCTCAACTCTCATGGCTTTTGCAATGATGAGCTTGGACTTTGGGGGTCTTGCTGGCCTGTGGTCAGCTCCTCTCAAACAAATTAGCTTGCCAGTGTTTGGTGGCATCACGGGTGTGATAACTATCTACGCTTGTGGTTTTCCACCAAGTAACCTTCAGTGATGAAGGTCTGCTGGGGCTCATAAATGTCTCTCCTCAGCGAGGACAGCTCTTTGAAC	Fungi	Basidiomycota	Agaricomycetes	Thelephorales	Thelephoraceae	Tomentella	tomentella-thelephora	gb|JF506817.1	99.55	6.1e-94	95.89
OTU936	319_430942|F|ITS2;size=4737;	LT979899	AATTCTCAAAATCCCTTCTTTGATAGGAAAGGATTTTGGACTTGGAGGCCTTTTGCTGGTTTCGCCTTGAAGCGAGCTCCTCCCAAATGAATTAGTGGGGTCTGCTTTGCCGATCCTTGGCGTGATAAGTCATTTCTACGTCTTGGGGTTTGGCACTGTACACCTGCTTCTAACTGTCTCACGGACAAAGGTGGTGTTCGGGTTGCCCCCGATTCGTCGGAGGGTGGCTCGACCCACAAAATGAAC	Fungi	Basidiomycota	Agaricomycetes	Russulales	Russulaceae	Russula	russula-lactarius	gb|JQ991808.1	100	7.57e-123	99.59
OTU937	319_434255|F|ITS2;size=524;	LT980183	AATTATCAATCTTAGGATTGGACTTGGGATTTGCTGGCTTTGAGTAGTCAGCTGTCCTTAAATGTATTAGCAAGTCAAGTCTTGACGTGCACGGCCTGTCTTCGGTGATAAATGATCCGTTGGTCCGGGCTGGAAGCGTTATTAGGAAACTTGCTTATAATTATTGTGTAACCAAAAA	Fungi	Basidiomycota	Agaricomycetes	Boletales	Boletaceae	Octaviania	boletus	JN257992	100	2e-89	100
OTU938	319_442182|F|ITS2;size=901;	LT980116	TCGTTCTCAACCAACGGAGGGATTCGTTGGCTTGGAGTTGGGAGTTGCTGGCTTCGTTCAGCTGTCCTGAAAGACATTAGGCTAACGTGCACGGCTTTCAGGCGTGATAATGATCGCCTTGGCTGGAGCGTGGCTTGAATTATCTTTACCCCCTTGA	Fungi	Basidiomycota	Agaricomycetes	Boletales	Boletaceae	Retiboletus	boletus	AB509818	100	5e-75	98.74
OTU939	32_750339|F|ITS2;size=716;	LT980153	AATTCTCAACCATCACCATCTGTGGATGGCTTGGAGTTGGGAGTTGCTGGCGGGAAACGTCAGCTCTCCTTAAATGTATTAGCGATCGAGTTGGCTGGTCTTTGACGCACACGGCCTTGGACGTGATAATGATCGTCGTGGCTGGAGCGTCTTTTCCTAGACTATGTACATGGATGGCTTCCAATCTACCGATCGAGCTCAGCTACTAGTCAGTCTTTGACGAGGCCGACGAACACGAGCGAGAGAGGACTTTGA	Fungi	Basidiomycota	Agaricomycetes	Boletales	Boletaceae	Phylloporus	boletus	JQ967280	100	1e-128	99.22
OTU940	32_750753|F|ITS2;size=156;	LT981177	CAACCCTCAGGCTCTTAGCTGGCCCGGCGTTGGGGCATCTGCGACGATCGCAGGCCCTGAAAGACAGTGGCGGTACCCGCTAGCACTCCGGGCGTAGTAGATTTATTTCTCGCCTAGGACGTCTAGCGGGCTTGCCGGCCGTAAAACGCTCTAATCTTCGGAA	Fungi	Ascomycota	Sordariomycetes	Sordariales	_	_	sordariales1	emb|LN912465.1	100	3.42e-75	98.77
OTU941	32_757563|F|ITS2;size=2;	LT981116	ATACCTCAAGCCTGATGCTTTCTTGGCGTCTTATGCTTGGATTTGGGCTTTGCCGTTGCCTTTGCATATCTCTGGCGACGGCTGGTCTTAAATGCATTAGCTGATCCATGCTTGTGTACTTGGTTCTACTCGGCGTGATAAATTATCTGACCGCTGAGGACATTTGCCCGTTGTGTGGCGAATGGCCAGGTGTGCCTTGGGTTGCTTCTAATCTCGATTGCCCCCCTGGGGTGGGTGACGAACACACTTTCAA	Fungi	Basidiomycota	Agaricomycetes	Cantharellales	Clavulinaceae	_	clavulina	GU328569	84	9e-65	88.73
OTU942	32_760461|F|ITS2;size=7481;	LT980830	AATTCTCAACCATGAACTTTGAGATCATGGCTTGGAGTTGGAAGTTGCTGGCCTTCCGGCCAGCTCTTCTTAAACGGATTAGCGATCGAGTTGGCTAGTCTTTGACGTACACGGCCTTGGACGTGATAATGATCGTCCTGGCTGGAGCGTCTTTTTTGTAGACTATGCACACAGATGGCTTCTAATAAGAATGGTCGAGCGAGCTTAGCTATTAGGCAGTCTGCTGTTTGTTAAGGCAAGGCAAGGCTGGCGAACGCAAGCTTGAATTATGGACCATGATCAGCG	Fungi	Basidiomycota	Agaricomycetes	Boletales	Boletaceae	Boletus	boletus	HE814204	100	3e-130	95.88
OTU943	32_762231|F|ITS2;size=107;	LT981117	ACATTCTCAAGCTGGATGCTTTTTTCCTTTAGAAAGTTGCATCTTAGCTTGGCTTTGGGCATTGCAGTGGCCCCCTTTATTGGGGAACTGCTGGCCTTAAAAGTATTAGCTGGCCCTCATGTAGGAATTGGTTCTGCCTCAGCGTGATAATAATTGTGACTGCTGAGGACATCTTCCGGGATGGCCAAGTTCTATTTAGGGGTTGCTCCTAATCCGTGGCTTGCAGATTCTTTGAATCTGGTTCCACACTCACACATGA	Fungi	Basidiomycota	Agaricomycetes	Cantharellales	Clavulinaceae	_	clavulina	FJ454901	97	2e-76	87.65
OTU944	32_764341|F|ITS2;size=1228;	LT981130	GATCTCTCAAAGGATAGGTTTATCCTATCCTTTGGATTTTGGGTCTTGCCGTGAATATTGCTTCTTGGCTTACCTTGAAACTATTAGCAAGCTTTGTTTGGGTCATGTTGAATGAGGCGTTTTAATGGATTCCAATTGACGGCTCTCAATGTGATGAAAGACTTGCTTCCAATCATCCCATTGAAGGGATATTATTGGCTCTCAATAATGAGTTCCAAAATGGA	Fungi	Basidiomycota	Agaricomycetes	Cantharellales	Cantharellaceae	_	cantharellus	JQ991672	100	2e-111	99.11
OTU945	320_459854|F|ITS2;size=2846;	LT979567	TACTCTCACACTCTAATTCATTTTGGAGAAGTGGACTTGGGTGTTGCCGCTTTGCTGTGGCTCATCTTAAATATGCTAGTGCACCTCATGGTTGGATATAGTACAGCGTGATAAGTATCTTCGCTGGCACCTCATGAAGAGGGTATCCGATTGGGAGCTCTGTGCTTCAAACCGTCCTGTCTGGGACATCTCTGACA	Fungi	Basidiomycota	Agaricomycetes	Sebacinales	Sebacinaceae	Sebacina	sebacina	GU180319	100	4e-87	95.98
OTU946	320_460967|F|ITS2;size=4898;	LT979900	AATTCTCAAACCTTCTTGGTTTCTTGACCAAGTCGGCTTTGGACTTTGGAGGTTGCTGGCTTTGCAAAAAGCCAGCTCCTCTTAAATACATTAGTAGGGTCTCCTTTGCCGATCCCCAGGCGTGATAAGTCGCTTCTACGTCTTGGGATTTGCTCTGTTCCTTGAGAACCTGCTTCCAATCGTCTCATCGAAGACATCGTTCGAGCTTGCTCGACCCACGAA	Fungi	Basidiomycota	Agaricomycetes	Russulales	Russulaceae	Russula	russula-lactarius	AB848574	100	4e-107	98.2
OTU947	320_462728|F|ITS2;size=583;	LT979568	GTACTCTCACACTCTCTGATCCTTTGGATTTGGGGAGCGGTGGACTTGGGTGCTTGCTGCTTTCCTTGTGGCTCACCTGAAATGCGTCAGTGCACCTCTTGATTGGACATAGTACGGCGTGATAAGTGTCTTCGCCGGCACCTCACAATACGAGGGTGGCCATTTGGGAGCTCTGTGCTTTCCAATCGTCTTCGGACAATCTCTGACA	Fungi	Basidiomycota	Agaricomycetes	Sebacinales	Sebacinaceae	Sebacina	sebacina	KM576576	100	2e-86	94.71
OTU948	320_465046|F|ITS2;size=10532;	LT979569	GTACTCTCACACTCTCCGATCCTGTGGATTTGGGGAGCGGTGGACTTGGGTGCTTGCTGCTTTCCCTGTGGCTCACCTCAAATGCGTCAGTGCATCTCTTGATTGGACATAGTACGGCGTGATAAGTATCTTCGCCGGCACCTCGTAAGAGGGTGGCCAACTGGGAGCTCTGTGCTTTCCAACCGTCTTCGGACAATCTCTGACA	Fungi	Basidiomycota	Agaricomycetes	Sebacinales	Sebacinaceae	Sebacina	sebacina	gb|KM576576.1	100	4.67e-90	96.59
OTU949	321_471912|F|ITS2;size=514;	LT979901	ATCTTCTCAACCTTATTGGTTTCATTGAGACCAACAAGGCTTGGACTTTGGAGGTTTTTCTTGCTGGCCTTGTTTTCAAGTCAGCTCCTCCTAAATGAATTGGTGGGGTCCGCATTAGTCGATCCTTGACGTGATAAGCATTTCTTCTACGTCATGTCGGCTCGGAACCTGCTTTCTAACCCTAGAGTTACATGTAACTCTACTGTTTTTATAAA	Fungi	Basidiomycota	Agaricomycetes	Russulales	Russulaceae	Russula	russula-lactarius	emb|LN911275.1	98.6	4.08e-85	94.34
OTU950	321_472359|F|ITS2;size=25;	LT979445	ACACCTCAACTCTCCACGGTTTGCCGTGGTGAGCTTGGACTTTGGAGGTTTGCTGGCCCACGGTCGGCTCCTCTCAAATGGATCAGCTAGCCAGTGTTTGGTGGCGTCACAGGTGTGATAAATATCTACGCTTGCCGCCGTCTGCCATGTAACCTCCAGCGATGGAGGTTCGCTGGAGCTTAAAAACGTCTCTCCTCAGCGAAGACAGCTTTTTTAAC	Fungi	Basidiomycota	Agaricomycetes	Thelephorales	Thelephoraceae	Thelephora	tomentella-thelephora	emb|LN910770.1	100	3.67e-91	95
OTU951	321_472401|F|ITS2;size=14;	LT979466	AATTCTCAACTCCTCTCGATCGACTTCGAGTGGAGCTTGGATGGTGGGGGCTGCCGGAGACCTGAATATTCGTGTTCGGGACTCGGGCTCCTCTGAAATGTATTGGCTTGCGGTCTGTTTTCGACTTTGCATGACAAGGCTTTTGGCGTGATAATGATCGCCGCTCGCCGAAGTGCATGAATGAAACCGTGCCGTGCCTCTAATCCGTCGATGCCTCTATGGGGCGTCTTCTTTATGC	Fungi	Basidiomycota	Agaricomycetes	Boletales	Suillaceae	Suillus	suillus-rhizopogon	KJ415102	100	1e-122	100
OTU952	321_473387|F|ITS2;size=5;	LT981095	ATATATTATCAACCTCAGCTTGTTGAGTGTTGGATAGTGGGGGGTTGCTGGTCTTATTTTTTGAGATCAGCTCCCCTAAAATGTATTAGCAGAACAATATGTTGACCCGTTCATTGGTGTGATAACCTATCTACACTATTAACGTGGTGAGGCAGGTTCAGCTTCTAACTTGTCTTTTGACTTTTATTAATGA	Fungi	Basidiomycota	Agaricomycetes	Agaricales	Cortinariaceae	_	cortinarius	gb|KJ920054.1	78.76	1.57e-34	85.35
OTU953	321_478956|F|ITS2;size=2;	LT979902	ATCTTCTCAACCTTATTGGTTTCATTGAGACCAACAAGACTTGGACTTTGGAGGTTTTTCTTGCTGGCCTTGTTTTCAAGTCAGCTCCTCCTAAATGAATTGGTGGGGTCCGCATTAGTCGATCCTTGACGTGATAAGCATTTCTTCTACGTCATGTCGGCTCGGAACCTGCTTTCTAACCCTAGAGTTACATGTACCTCTACCATTTTATAAA	Fungi	Basidiomycota	Agaricomycetes	Russulales	Russulaceae	Russula	russula-lactarius	emb|LN911275.1	98.6	4.11e-80	92.93
OTU954	321_479769|F|ITS2;size=10;	LT978911	ACACCTCAACTCTCATGGTTTGCCATGATGAGCTTGGACTTTGGAGGGTCTTGCTGGCCTGTGGTCAGCTCCTCTCAAATGAATCAGCTTGCCAGTGTTTGGTGGCATCACAGGTGTGATAAATATCTACGCTTGTGGTTTTCTGCCAGGTAACCTTTGGCAACGGAGGTCCGCTGGGGCTCATAGACGTCTCTCCTTCAGCGAGGACAGCTTTTTGAA	Fungi	Basidiomycota	Agaricomycetes	Thelephorales	Thelephoraceae	Tomentella	tomentella-thelephora	emb|LN911822.1	100	1.41e-85	93.61
OTU955	321_482256|F|ITS2;size=337;	LT978912	ACACCTCAACTCTTGTGGTTCGCCATGAAGAGCTTGGACTTGGGGGCTTGCCGGCGCACAGCTGGCTCCTCTCAAATGAATTAGCCTCCCAGTGTTTGGTGGCATCACGGGTGTGATAACTATTTACGCTTGTGGTTGCCTGCCAGGTAACCTTTGGTGACGGAGGTTTGCTGGAGCTTATAAACGTCTCTCCTTGGTGAAGACAGCTATTTGAAC	Fungi	Basidiomycota	Agaricomycetes	Thelephorales	Thelephoraceae	Tomentella	tomentella-thelephora	emb|LN912397.1	100	1.67e-104	99.07
OTU956	321_483807|F|ITS2;size=108;	LT979446	ACACTTCAACTCTCATGGTTTGCCATGATGGGCTTGGACTCTGGGGGTTTTGCTGGCCTCTGTGGTCAGCTCCTCTCAAATGAATCAGCTTGCCCAGCATTTGGGGGCATCGTGGGTGTGATAACTATCTACGCCTGTGGTCGTCTGCCATGTAACCTTCTGTGATGGAGGTTTGCTGGAGCTTACAAACGCCCTCTCCTCAGCGAGGATGGCATTTTGAAT	Fungi	Basidiomycota	Agaricomycetes	Thelephorales	Thelephoraceae	Thelephora	tomentella-thelephora	AB509755	100	2e-110	99.1
OTU957	322_485150|F|ITS2;size=57;	LT980368	AATTCTCAAGTCCACACTTTGTTGTGGCTTGGATAGTTGGGTGTTGCTGGCTTTTTTAATTTTCAGCTCATCTTAAATGTATAAGTGGGATTTTTTCTAGAAACTTGTTAGGTGTTGTAAATAATCAATTCATCTATGTTTCTAAAATATGCTTGCTTCTAACAAAACCCTTTGATGA	Fungi	Basidiomycota	Agaricomycetes	Agaricales	Inocybaceae	Inocybe	inocybe	gb|GQ893005.1	91.01	1.9e-54	92.03
OTU958	322_492341|F|ITS2;size=726;	LT981045	AATTCTCAAACCACATACTTGTGTTTGTGGGTTGGATAGTTGGGTGTTGCCTAATTTAATAGTAGGCTCTCCTTAAATGTATAAGTGGTGCATTTAGAAACTTGTTAGGTGTTGTAAATTTATCAATACATCTATGTTTCTGAAAATGAGCTGCTCCTAATAAAAACTTTTTGATGA	Fungi	Basidiomycota	Agaricomycetes	Agaricales	Inocybaceae	_	inocybe	AJ889956	80	1e-42	89.12
OTU959	322_507600|F|ITS2;size=148;	LT978572	AATTCTCAACCATGATCTCTTTTTCGAAAGAGATCGTGGCTTGGAGTTGGGAGTTGCTGGCCGGACCGTCAGCTCTCCTTAAACAGATTAGCGATCGAGTTGGCTAGTCTTTGACGTACACGGCCTCGGACGTGATAATGATCGTCCTGGCTGGAGCGTCTTTTTTGTAGACTATGCACACGGATGGCTTCTAATAAGAATGGTCGAGCGAGCTTAGCTATTAGGCAGTCTGCTGTTTGCTCAGGCAAGGCAAGGCTGGCGAACGCAAGGTTGAATTGTGGACCATGATCAGCG	Fungi	Basidiomycota	Agaricomycetes	Boletales	Boletaceae	Xerocomus	boletus	emb|LN911189.1	89.46	5.75e-124	97.72
OTU960	322_520451|F|ITS2;size=3838;	LT980983	ATTTCTCAACCCCTCTTGATTTGATTCGAGGGGGAGCTTGGATGGTGGGGGTTTTGCCGTAGACTTGGGCCAAGTTCTTCTTGGTCTAGGATTTGGGGCTCTCCTGAAATGCATTGGCTTGCGGTCGACTTTCGACTTTGCACGACAAGGCTTTCGGCGTGATAATGATCGTCGTGTGCTGAAGTGCATGAATGAAGGTTCCGTGCCTCTAATATGTCGATCCCCCTTTACATTAGTATAGGGGGGTCTTCCTCTCTGAC	Fungi	Basidiomycota	Agaricomycetes	Boletales	Rhizopogonaceae	_	suillus-rhizopogon	AB839390	100	4e-133	99.62
OTU961	322_520791|F|ITS2;size=7167;	LT978913	ACACTTCAACTCTCATGGTTTACTGTGATGAGCTTGGACTTTGGAGGTTTTTGCTGGTGCATGATCAGCTCCTCCCAAATAAATTAGCTTGCCGGTCATCGGTGGCATCACAGGTGTGATAACTATCTACGCTTGTGGTCGTCTGCTGGGAAACCTTCTGGCAACAGAGGTTTGCTGGAGCTCATAAATGTCTCTCTTCAGTGAAGACAGCTTTTTGAAC	Fungi	Basidiomycota	Agaricomycetes	Thelephorales	Thelephoraceae	Tomentella	tomentella-thelephora	HE814182	100	6e-111	99.55
OTU962	323_537172|F|ITS2;size=466;	LT981096	ATATATATCATCAACCCCTCTCTCTTGTTTGAGAGAGTGGCTTGGATGTGGGGGTTTGCTGGCCCTGTTCAGCTTCCCTGAAATGCATTAGTGGAACGACCTGTTCATTCATCGGTGTGATAACTATCTACGCTGTCGAATGTGAGGTGGCTGTTCAGCTCTCCAACCGTCCTCGGACAATTTGCTGTTGT	Fungi	Basidiomycota	Agaricomycetes	Agaricales	Cortinariaceae	_	cortinarius	AB218169	100	1e-57	87.56
OTU963	323_537349|F|ITS2;size=805;	LT980590	ATATATATATCAAACTTCTCTTGTAGAGTTGTTTGGATGTGGGGGTATTGCTGGCCTCTTTTTTAAAAAGGGGGGTCAGCTCTCCTGAAATGCATTAGCAGAACGACCTGTTGTTCATTGGCGTGATAACTTATCTATGCTATTGAATCTGAAGGGAGGTTCAGCTTTCTAACAGTCTTTGGACAAATTCATCATTA	Fungi	Basidiomycota	Agaricomycetes	Agaricales	Cortinariaceae	Cortinarius	cortinarius	AB701404	100	7e-75	92.96
OTU964	323_546012|F|ITS2;size=3040;	LT980369	AAAACTTCTCAACCACATTTCTTTTTATTGGGGGTGTGGCTTGGAAATGGAGGAGTGCAGGCTTCTTTTGAAGTCTGCTCCTCTGAAATGTATTAGCGGTGTCTGAACAGACTACCACAGGTGTGATAACTATCAATGCCTTGGTATATATGGCTGGCTGCTTCCAATCTCTAATGACCA	Fungi	Basidiomycota	Agaricomycetes	Agaricales	Inocybaceae	Inocybe	inocybe	JF908209	62	5e-41	93.86
OTU965	324_546601|F|ITS2;size=66;	LT978914	ACACCTCAACTCTCATGGTTCGCCGTGATGAGCTTGGACTCCGGGGGTTTTGCTGGCCTGCGGTCGGCTCCCCTCAAATGAATCAGCCTCCCAGTGTTTGGTGGCATCACGGGTGTGATAAATATCTACGCTCACGGTTGTCCGCCAGGTAACCTTTGGCGACAAAGGTTCGCTGGAGCTCACAGATGTCTCTCCTCAGCGAGGACAGCTTTTTGAAC	Fungi	Basidiomycota	Agaricomycetes	Thelephorales	Thelephoraceae	Tomentella	tomentella-thelephora	gb|KT275637.1	100	6.02e-104	98.62
OTU966	324_547504|F|ITS2;size=5;	LT980370	AACTTCTCAACCGCATCGATTTCTGATCTGGTGTGGCTTGGATGTGGGGGTTGTTTTTGCAGGCCTCTGAATGAGGTCGGCTCCCCTGAAATGCATTAGTGGTATCTGAGCAGAACCATTAGGTGTGATAAGTTATCTATGCCTTTGGTATGCAGATTGTACCGCTTCTAACATATAAATTTGACAA	Fungi	Basidiomycota	Agaricomycetes	Agaricales	Inocybaceae	Inocybe	inocybe	JX630662	82	2e-49	90.32
OTU967	324_549869|F|ITS2;size=12;	LT980591	ATATATATCAATCTCATCAGCTTCTGCTTGTTGAGTTTGGAAGTGGGGGGTCTTTTTTGCTGGCTTCTTTTCTGGAGTCAGCTCCCCTGAAATTCATTAGCGGAACAACTTGTTGACCGTTCATTGGTGTGATAACTATCTACGCTATTGACGTGAAGCACGTTCAGCTTCTAACCGTCCATTGACTTGGACAAATTTTCATTA	Fungi	Basidiomycota	Agaricomycetes	Agaricales	Cortinariaceae	Cortinarius	cortinarius	UDB002732	99	4e-77	92.61
OTU968	324_563235|F|ITS2;size=663;	LT978915	ACACCTCAACTCTCATGGCTTGCTGTGATGAGCTTGGACTTTGGGGGTCTTGCTGGCCTGTGATCAGCTCCTCTCAAATGAATTAGCCTGCCGGTGTTTGGTGGGATCACAGGTGTGATAACTATCTACGCTTGTGGTTTTCCACCAGGTAACCCTCAGCAATGGAGGTTCACTGGAGCTTATAAACGTCCCTCCTCGGTGAGGACAGGTTTTGACC	Fungi	Basidiomycota	Agaricomycetes	Thelephorales	Thelephoraceae	Tomentella	tomentella-thelephora	GQ900538	100	1e-102	97.7
OTU969	324_566734|F|ITS2;size=78;	LT978916	ACACCTCAACTCTCGTGGTTTGCCATGATGAGCTTGGACTCTGGGGGTTTTGCTGGCCTGTGGTCAGCTCCTCTCAAATGAATCAGCTTACCAGTATTTGGTGGCGTCACAGGTGTGATAACTGTCTACGCTTGTGGTTGTCTGCCGAGTAACCTTTGGTGACAGAGGTTCGCTGGAGCTTATAAACGTCTCTCCTCAGCGAAGACATCTTTTTTGACC	Fungi	Basidiomycota	Agaricomycetes	Thelephorales	Thelephoraceae	Tomentella	tomentella-thelephora	gb|KP827697.1	100	2.84e-92	95.43
OTU970	324_569342|F|ITS2;size=4967;	LT978917	ACACCTCAACTCTCATGGCTTGCCATGATGAGCTTGGACTTTGGGGGTCTTGTTGGCCTGTGAGCCAGCTCCTCTTAAATGAATTAGCTTGCCGGTGTTTGGTGGCGCCCCAGGTGTGATAACTATCTACGCTTGTGGTTTCCCATCAGATAACCTTCAGTGATGGAGGTTCGCCGGGGCTTATAAACGTCTCTCCTCGGTGAGGACAGATTTTGACC	Fungi	Basidiomycota	Agaricomycetes	Thelephorales	Thelephoraceae	Tomentella	tomentella-thelephora	UDB014126	100	7e-105	98.17
OTU971	324_570466|F|ITS2;size=157;	LT978918	ACACCTCAACTCTCATGGTTTTTCCGTGATGAGCTTGGACTTTGGGGGTCTTGCCGGCCTGCCGTCGGCTCCTCTCAAATGAATCAGCTTGCCAGTGTCTGGTGGCGTCACGGGTGTGATAACTATCTACGCTTGTGGCTATCCACCGGGTAACCTTCGGTCTGAAGGTTCACTGGAGCTCATAGAGGCCCTTTGTGTGGGCAGCTTCTCGAAC	Fungi	Basidiomycota	Agaricomycetes	Thelephorales	Thelephoraceae	Tomentella	tomentella-thelephora	AB848672	100	1e-92	95.33
OTU972	325_572087|F|ITS2;size=2564;	LT980371	AATTCTCAAACCACACTTTGTTGTGGCTTGGATAGTTGGGTGTTGCTGGCCAAGTTCAGCTCATCTTAAATGTATAAGTGGGATTTTTTCTAGAAACTTGTTAGGTGTTGTAAATAATCAATTCATCTATGTTTCTGAAAAATAAGCTTGCTTCTAATGCTGTATTAATGA	Fungi	Basidiomycota	Agaricomycetes	Agaricales	Inocybaceae	Inocybe	inocybe	gb|GQ893005.1	100	1.15e-75	97.66
OTU973	325_578051|F|ITS2;size=4;	LT978919	ACACCTCAACTCCCGTGGTTCGCCACGGTGAGCTTGGACTTTGGGGGTTTTGCTGGCCTGTGGTCGGCTCCTCTCAAATGAATTAGCCTGCCAGTGTTTGGTGGCGTCACGGGTGTGATAAATATCTACGCTTGCGATTGCCCACCATGTAACCTTCAGCAATGGGGGTTCGCTGGGGCTCATAGACGTCTCTCCCTAAGTGAGGACAGTTTTTTAAC	Fungi	Basidiomycota	Agaricomycetes	Thelephorales	Thelephoraceae	Tomentella	tomentella-thelephora	HE814192	100	3e-103	97.71
OTU974	325_587072|F|ITS2;size=25;	LT980782	CACCACTCAAGCCTGGCTTGGTGTTGGGCGACGTCCCCATCGGGGACGCGCCTCGAAACGGTCGGCGGCGTGGCACCGGCTTTAAGCGTAGCAGAATCTTTCGCTTTGAAAGTCGGGGGCCCCGTCTGCCGGAAGGCCTACTCGCAA	Fungi	Ascomycota	Dothideomycetes	Hysteriales	Gloniaceae	Cenococcum	cenococcum	AB571489	100	1e-66	97.96
OTU975	325_591594|F|ITS2;size=124;	LT978920	ACACCTCAACCCTCGTGGTTTGCCACGATCGGCTTGGACTTTGGAGGTTTTGCTGGCCCCTGTGGTCGGCTCCTCTCAAATGAATCAGCTCACCAGTGTTTGGTGGCGTCGCAGGTGTGATAACTATCTACGCTCGCGGCCGTCTGCCATGTTACCTTCAGTGATGAGGGTTCACTGGGGCTCACAGATGTCTCTCCTGAGTGAAGACAGCTTTTTGATC	Fungi	Basidiomycota	Agaricomycetes	Thelephorales	Thelephoraceae	Tomentella	tomentella-thelephora	gb|JQ991886.1	100	1.01e-96	96.36
OTU976	325_592708|F|ITS2;size=184;	LT979903	AATCCTCAAAACCTTTTTCTTTGATGAGAAAAGGAGTTTTGGACTTGGAGGTTCAATGCTCGCTCTCGATTCCGAAAGCGAGCTCCTCTCAAATGAATCAGTGGGGTCCGCTTTGCTGGTCCTTAACGTGATAAGTCGTTTCTACGTTTTGGATCTGGCACTGTCCCATGGATGCCTGCTTCTAACCGTCTCACAGACAATGATGGTGCTCCGGTCACCCGCCACCTACTATGTTGGCGGGAGGCTTGACCCACAACAAAAAA	Fungi	Basidiomycota	Agaricomycetes	Russulales	Russulaceae	Russula	russula-lactarius	gb|JQ991784.1	100	1.27e-120	96.96
OTU977	325_597231|F|ITS2;size=122;	LT978921	ACACCTCAACTCTCATGGTTCTCCGTGATGAGCTTGGACTTCTGGGGGTTTTGCTGGCCTGCGGTCGGCTCCTCTCAAACGGATCAGCTTTCCAGTGTTTGGTGGCGCCATGGGTGTGATAACTATCTACGCTTGCGGTCGTCTGCCGGGTAACCTTTGGTGACAGAGGTTCGCTGGAGCTTACAAACGTCTCTCCTCAGCGAAGACAGCTTTTGATC	Fungi	Basidiomycota	Agaricomycetes	Thelephorales	Thelephoraceae	Tomentella	tomentella-thelephora	gb|JQ991872.1	97.25	1.33e-85	94.34
OTU978	326_618421|F|ITS2;size=251;	LT978922	ACACCTCAACTCTCATGGTTTGCCATGATGAGCTTGGACTTTGGGGGTTTTGCTGGCCTAAGGTCAGCTCTCCTCAAATGAATCAGCTTGCCAGTGTTTTGGTGGCATCACGGGTGTGATAACTATCTACGCTTGTGGATTCCCACCAGGCAACCTTCAGCGATGAAGGTTCGCTGGAGCTTATAAACGTCTCTCTCAGCGAGGACAGCATTTTGAA	Fungi	Basidiomycota	Agaricomycetes	Thelephorales	Thelephoraceae	Tomentella	tomentella-thelephora	HE814209	100	6e-111	100
OTU979	326_620781|F|ITS2;size=3630;	LT979904	AATTCTCAAAACCCTTTCCTTTTGGGAAAAGGATTTTTGGACTTGGAGGTTCGATGCTCGCCCTCGTTTTCGAGAGTGAGCTCCTCTCAAATATATTAGTGAGGTCCGCTTTGCCAATCCTTGACGTGATAGATGTTTTCTACGTTTTGGATCCGGCACTGTCCCTTGGACGTTCGCTCCCAACTGTCCCATGGACGACGATGGTGCTTCGGTCGCCGCCACCCTACATTGGCGGGAGGCTGGACCCACAAAATAAAAC	Fungi	Basidiomycota	Agaricomycetes	Russulales	Russulaceae	Russula	russula-lactarius	gb|AY061690.1	88.8	1.09e-81	91.34
OTU980	326_622066|F|ITS2;size=9593;	LT981131	GAACCTCTCAAAGGGCTGAGACTTTGTTGTCTCAGTCACCCTTTGGATTTGGGTCTTGCCGTGAATTTTTATCCATCTCGGCTCACCTTGAAAGTATTAGCAAGCCTTATTCACAAAAGCCATTTGATGAAGGCGTTCTAAAGTTGATTCTTTTACGTCTGAATCATCAACATGTCTCAGTGCTTTGAAACTTGCTTCCAATCATCCTTTAAATAGGATGGGCTCAATGCCCTTTCAATGTAT	Fungi	Basidiomycota	Agaricomycetes	Cantharellales	Cantharellaceae	_	cantharellus	JQ991671	100	1e-118	98.36
OTU981	327_637918|F|ITS2;size=743;	LT979905	AATTCTCAAAACCCCCTTTTCTTCTGAAAAAGGTTTTTCTGGACTTGGAGGTTCAATGCTCGCTTTCACTTTTGAAGGTGAGCTCCTCTCAAATGAATTAGTGGGGTCTGCTTTGTCGATCCTTGACGTGATAAAATGTTTCTACGTTTTGGATTTGGCACTGTCTCTTGGACACCTGCTACTAACTGTCTCATGGACAAATGATGGTGTTTCGGTCACCGCCATTGGCGGGAGGCTGGGCCCACGGAAAAAC	Fungi	Basidiomycota	Agaricomycetes	Russulales	Russulaceae	Russula	russula-lactarius	emb|LN909843.1	100	7.57e-123	98.81
OTU982	327_639632|F|ITS2;size=1275;	LT979906	AATCATCAAAACCCTTTTTCTTTACGGGAAAGGGTTTTGGACTTGGAGGCCTTTTGCCGGTTTCGTGTCGAAGCCAGCTCCTCCTAAATGAATTAGTGGGGTTCGCTTTGTCGATCCTTGACGTGATAAGATGTTTCTGCGTCTTGGGTTTGGCACTGTTGCCCGCTTCCAACCGTCTCGTCGACAACGATGGTGTTCCGGTCGCCGCCTCTCCGTAGGTGGTCGGCTTGACCCACAACAAAAA	Fungi	Basidiomycota	Agaricomycetes	Russulales	Russulaceae	Russula	russula-lactarius	HG423573	97	5e-102	94.96
OTU983	327_640262|F|ITS2;size=2578;	LT979907	AATTCTCAAAAAACCTTTTCCTGCTTTTGCTGGAAAGGATTTTTGGACTTGGAGGTTCAATGCCTGCTTTTCACCTTTGAAAAGCAAGCTCCTCTCAAATAAATTAGCGGGGTCTGCTTTGCCGATCCTTGACGTGATAAGATGTTTCTACGTTTTGGATTTGGCACTGTCCCTTTGGACACCTGCTCCTAACTGTCCCACGGACAATGATGGTGCTCTGGTCTTTGCCGTCTACACTGGCGGGGGAGGCTGGACCCACAAAAGAAAA	Fungi	Basidiomycota	Agaricomycetes	Russulales	Russulaceae	Russula	russula-lactarius	AB509672	100	3e-139	100
OTU984	328_655895|F|ITS2;size=115;	LT978923	AATTCTCAACTCTCATGGTTTGCCATGATGAGCTTGGACTTTGGGGGTCTTGCCGGCCTGTTGGTCGGCTCCTCTCAAATGAATCAGCTTGCCAGTGTTTGGTGGCATCGCAGGTGTGATAACTATCTACGCTTGTCGCTGTCTGCCAGGTAACCTTCAGCGATGGGGGTTCGCTGGAGCTCATAGACGTCTCTCCTCAGCGAGGACAGCTTTTGAAC	Fungi	Basidiomycota	Agaricomycetes	Thelephorales	Thelephoraceae	Tomentella	tomentella-thelephora	HE814198	98	6e-106	99.07
OTU985	329_659670|F|ITS2;size=1052;	LT981147	GAATTTCTCAACCATGTCTTCCTTCTGATGGAGGAAGATATTGGCTTGGATGTTGGAGGTTGCTGGCGTTCGTCGTCAGCTCTTCCGAAATACATTAGCGAATGGGGGTTGACATGCACGGCCTTTCGACGTGATAATGATCGTCGTGGGGCTGGAGTGTCACGTTCGCTTCCAATTCATGTTCGTGAAGCTTGTGTGTGTGTGTGCCATGTTTCTTACATCGTGCTCGCTCGCTCGCTCTCGAACGATTGTTG	Fungi	Basidiomycota	Agaricomycetes	Boletales	Boletaceae	_	boletus	UDB016992	48	6e-27	85.25
OTU986	329_659688|F|ITS2;size=50;	LT978924	ACACCTCAACTCTCATGGTTTGCCATGATGAGCTTGGACTTTGGGGGACTTGCTGGCCTGCAGTCAGCTCCTCTCAAATGAATCAGCTTTCCAGTGTTTGGTGGCATCACGGGTGTGATAAATATCTACGCTTGTGGTTTGCTGCCAGGTAACCTTCAGTGATGGGGGTTTGCTGGGGCTCATAAACGTCTCTCCCTGTGAGGACAATTTCTGAAC	Fungi	Basidiomycota	Agaricomycetes	Thelephorales	Thelephoraceae	Tomentella	tomentella-thelephora	gb|JQ991893.1	99.54	3.65e-96	96.77
OTU987	329_660606|F|ITS2;size=2;	LT978925	ACACCTCAACTCTCATGGTTTACCATGAATGAGCTTGGACTTTGGAGGTCTTGCTGGCTGGTGGCCAGCTCCTCTCAAATGAATCAGCTTGCCAGTGTTTGGTGGCATCACGGGTGTGATAAATATCTACGCTTGTGGTTTGCTGCCAGGTAACCTTCAGTGATGGGGGTTTGCTGGGGCTCATAAATGTCTCTCCTCAGTGAAGACACCTTTGTGAAT	Fungi	Basidiomycota	Agaricomycetes	Thelephorales	Thelephoraceae	Tomentella	tomentella-thelephora	gb|JQ991893.1	100	3e-92	95.43
OTU988	329_671328|F|ITS2;size=18;	LT978926	ACACCTCAACTCTCATGGTTTACCATGATGAGCTTGGACTTTGGAGGTCTTGCTGGCTGGTGGCCAGCTCCTCTCAAATGAATCAGCTTGCCAGTGTTTGGTGGCATCATGGGTGTGATAACTATCTACGCTTGTGGTTTTTCACCAGGTAACCTTCAGCAATGGAGGTTCGCTGGGGCTCATAGACGTCTCTCCTTAGCGAGGACAGCTTTTGAAC	Fungi	Basidiomycota	Agaricomycetes	Thelephorales	Thelephoraceae	Tomentella	tomentella-thelephora	gb|JF697026.1	100	5.06e-85	93.58
OTU989	329_676256|F|ITS2;size=13;	LT978927	ACACCTCAACTCTCATGGTTTACCATGATGAGCTTGGACTTTGGAGGTCTTGCTGGCTGGTGGCCAGCTCCTCTCAAATGAATCAGCTTGCCAGTGTTTGGTGGCATCATGGGTGTGATAACTATCTACGCTTGTGGTTTTTCACCAGGTAACCTTCAGTGATGGGGGTTTGCTGGGGCTCATAAACGTCTCTCCTCAGTGAAGACACCTTTGTGAAT	Fungi	Basidiomycota	Agaricomycetes	Thelephorales	Thelephoraceae	Tomentella	tomentella-thelephora	gb|GU214810.1	99.54	2.35e-83	93.09
OTU990	329_679310|F|ITS2;size=54;	LT980939	ACACCTCAACTCTCATGGTTTGCCATGACGAGCTTGGACTTTGGAGGTTTTGCTGGCATCTGTGGTCAGCTCCTCTCAAATGAATCAGCTTGCCAGTGATTGGTGGCATTGTGGGTGTGATAACTATCTACGCCCGTGGGTGTCCACCAGGCAACCTTCAGTGATGGAGGTTCACAGGGGCTTAGAAACGTCTCTCCTCAGCGAGGGACAGCATTTGAAC	Fungi	Basidiomycota	Agaricomycetes	Thelephorales	Thelephoraceae	_	tomentella-thelephora	JX630817	100	4e-73	89.55
OTU991	329_682564|F|ITS2;size=6764;	LT980516	CCATCCCTCAAGCTCCGCTTGGCTGGTTGGGCCGGCGTCCACCGGGAGACACCGGTGGACGGGCCTGAAAGGCAGTGGCGGCTCCCGGGGACTCTGGTCCCGGGGGCGGTGATGCATGGGTCTCTTCATCCACCGTCCCACGGGCCACGCCCCCGGAGTCGGTCGAACGGTCGGTCTTCCCCTGTA	Fungi	Ascomycota	Eurotiomycetes	Eurotiales	Elaphomycetaceae	Elaphomyces	elaphomyces	AB807936	100	2e-70	93.05
OTU992	33_769103|F|ITS2;size=3367;	LT979908	AATTATCAAAAACCTTTTTCTGCTTTTGCTGAAAAAGGATTTTTGGATTTGGAGGTTCAATGCTTGCCTTTCATCTTGGAAAGTGAGCTCCTCTTAAATGAATTAGTGGGGGTCTGCTTTGCTGGTCCTTGACGTGATAAGATGTTTCTACGTTTTGGATTTAGCACTGTCCCTTTGGATGCCTGCTCCTAACTGTCCCATGGACAACGATGGTGCTCTGGTCTTTGCCGTCTACTTTGGCGGGAGAGGCTGGTCCCACAAAAGAAAA	Fungi	Basidiomycota	Agaricomycetes	Russulales	Russulaceae	Russula	russula-lactarius	AB972832	100	3e-139	100
OTU993	33_776064|F|ITS2;size=102919;	LT979909	ACATCCTCAACCTGCTTGGTTTTTTCTCAAACCCAAGTAGGCTTGGAATTTGGAGGTTTTCTGCCGGCCTCCTCCGAAGCCAGCTCCTCTTAAATATATTAGTGGGATCCGCTTTGCCAGATCCTCGACGTTGATAAGATGTTTCTACGTCTTGGGTTTTGCTCGCGAAGGACCTGCTTCTAACCGTCCCACCAGGGACAATGTTCGAGCCGATCGCCCCTTCACCGGGTCGAGAAGCTTTCGACCCATGAAA	Fungi	Basidiomycota	Agaricomycetes	Russulales	Russulaceae	Russula	russula-lactarius	emb|LN911640.1	100	2.09e-128	100
OTU994	33_777170|F|ITS2;size=2;	LT980267	AAATATCAACCTCCTTGGTTTCTTTTGAACACCGAAGGAGGCTTGGACTTTGGAGGGCTTTGCTGGACTTGAAAGGCCAGCTCCTCTCAAATGAATTAGTGAGGTTCCCTTTGCCAATCCTCGACGTGTGATAAGATGCTTCCACGTCTCGGTCTTTGGCTCTGTCACCTTCTGGGACCTGCTTCCAATCGTCTCTTGAAGAGACAACGTTCAAGCGCGTCTCGACCATGTAC	Fungi	Basidiomycota	Agaricomycetes	Russulales	Russulaceae	Lactarius	russula-lactarius	gb|JQ991748.1	97.85	3.65e-96	95.2
OTU995	33_777692|F|ITS2;size=2757;	LT979910	ATACTCTCAACCTTCTTGGTTTCTTTGACCAGGAAGGCTTGGACTTTGGAGGTTTTTCTTGCTGGTCTCTTTTGAAGCCAGCTCCTCCTAAATGAATGGGTGGGGTCCGCTTTGCTGATCCTCGACGTGATAAGCATTTCTTCTACGTCTTGTCAGCTCGGAACCTGCTTTCCAACTGTCTTTGGACAAAGACAATGTTCGAGTTGCGACTCGACCTTACAAA	Fungi	Basidiomycota	Agaricomycetes	Russulales	Russulaceae	Russula	russula-lactarius	KM085395	100	1e-103	96.9
OTU996	33_778160|F|ITS2;size=81;	LT980268	AAATATCAACCTCCTCGGTTTCTTTTGAACGCCGAAGGAGGCTTGGACTTTGGAGGGCTTTGCTGGACTTGAAAGGCCAGCTCCTCTCAAATGAATTAGCGAGGTTCCCTTTGCCGATCCTCGACGTGTGATAAGATGCTTCCACGTCTCGGTCTTTGGCTCTGTCGCCTTTTGGAACCTGCTTCCAATCGTCTCTTGAAGAGACAACGTTCGAGCACGTCTCGACCACGTAC	Fungi	Basidiomycota	Agaricomycetes	Russulales	Russulaceae	Lactarius	russula-lactarius	JQ446124	98	1e-108	97.82
OTU997	33_780035|F|ITS2;size=5366;	LT979570	GTACTCTCACACTCCCAATCCCTTTGGATTGGGAGCGGTGGACTTGGGTGTTGCCGCTTGACTGAGGCTCACCTGAAATATGTTAGTGCATCTCTTGATTGGACATAGTACGGCGTGATAAGTGTCTTCGCCGGCTCCTCGCAAAGAGGGTGGCCGATCGGGAGCTCTGTTGCTTCAAACAGTCTTCGGACAATCTTCTGACA	Fungi	Basidiomycota	Agaricomycetes	Sebacinales	Sebacinaceae	Sebacina	sebacina	emb|HF674612.1	100	2.77e-97	99.02
OTU998	33_782003|F|ITS2;size=48;	LT978928	ACACCTCAACTCCTCATGGCTTGCCATGATGAGCTTGGACTTGGGGGGTCTTGCTGGCCTGCAGTCAGCTCCTCTCAAATGAATCAGCTTGCCAGTGTTTGGTGGCGCCACGGGTGTGATAAACATCTACTCTTGTGGCCCTCCGCCATGCAACCTTCAGTGATTGGAGGTTCACTGGAGCTCACAAATGTCTTTCCTCAGTGAAGACAGCTCTTTGATC	Fungi	Basidiomycota	Agaricomycetes	Thelephorales	Thelephoraceae	Tomentella	tomentella-thelephora	gb|EF218820.1	99.55	6.1e-94	95.89
OTU999	330_689896|F|ITS2;size=618;	LT978929	ACACCTCAACTCTCATGGCTTGCCATGATGAGCTTGGTCTCTGGAGGTCTTGTTGGCCCTGTGGTCAGCTCCTCTCAAATAAATCAGCTTACCAGTGTTTGGTGGCATCACAGGTGTGATAACTATCTACGCTTGTGGTTTTCCACCAGGTAACCTTCAGTGATGGGGGTTCGCTGGAGCTCATAAATGTCTCTCCTCAGCGAGGACAGCTCTCTGAAC	Fungi	Basidiomycota	Agaricomycetes	Thelephorales	Thelephoraceae	Tomentella	tomentella-thelephora	gb|JQ711813.1	100	1.71e-89	94.57
OTU1000	330_708045|F|ITS2;size=1364;	LT978930	ACACCTCAACTCTCGCGGTTCGCCACGATGAGCTTGGATTTTGGAGGTCTTGCTGGCCTGTGGTCAGCTCCTCTCAAACAAATCAGCTTGCCAGTGTTTGGTGGCATCACAGGTGTGATAAATATCTACGCTTGTGGTTTTCTGCCAGATAACCTTCAGCGATGGAGGTTCGTTGGAGCTTATAAACGTCTCTCCTCAGCGAGGACAGCTCTTTGAAT	Fungi	Basidiomycota	Agaricomycetes	Thelephorales	Thelephoraceae	Tomentella	tomentella-thelephora	emb|LN912729.1	99.54	2.15e-108	100
OTU1001	330_709714|F|ITS2;size=3129;	LT979911	AATCATCAAAAGACCTCTTTCTTTTCGAAAGAGATTTTTTGGACTTGGAGGTTTGATGCTTGCTTACGTTTTCGAAAGCGAGCTCCTCTTAAATGAATTAGTGGGGTCTGCTTTGTCGGTCCTTGACGTGATAAGATGCTTCTACGTTTCGGATCGGGCACTGTTGCTCGGACACCTGCTTCTAACCGTCTCACAGACAACGATGGTGCTCCGGTCACCAACCAATCATCTACATTGGTTGGGAGGCTGGACCCACGAAA	Fungi	Basidiomycota	Agaricomycetes	Russulales	Russulaceae	Russula	russula-lactarius	AB509939	100	4e-133	99.62
OTU1002	331_719231|F|ITS2;size=19087;	LT979912	AATCATCAAAAACCTTTCTCTTTGATCGTCTTTGGTCGGGAGAAGGATGTTTTTGGACTTGGAGGGTTCCATGCTTGCTTTCACTTTTGAAAATGAGCTCCTCTCAAATGAATTAGCGGGGTCTGCTTTGCTGGTCCTTGACGTGATAAGATGTTTCTACGTTTTGGATTTAGCACTGTCCCTTAGATGCCTGCTCCTAACTGTCTCACGGACAATGATGGTGCTCCGGTCACCGCCATCTACATTGGTGGAGGGGGCTGGACCCACAAAAGAAAAAA	Fungi	Basidiomycota	Agaricomycetes	Russulales	Russulaceae	Russula	russula-lactarius	gb|KR149748.1	100	2.65e-142	100
OTU1003	331_733412|F|ITS2;size=196;	LT980517	CCATCCCCTCAAGCTCCGCTTGGCTGGTTGGGCCGGCGTCCACCGGTGGTGGACGGGCCTGAAAGGCAGTGGCGGCTCCCGGGACTCCTGGTCCCTGGGGCGGTGATGCACGGGTCTCTTCATCCACCGTCCCACGGGCCATGCCCCGGGAGTCGGTCGAACGATCGGTCTTCCCCTGTA	Fungi	Ascomycota	Eurotiomycetes	Eurotiales	Elaphomycetaceae	Elaphomyces	elaphomyces	AB807936	100	2e-85	98.34
OTU1004	332_741029|F|ITS2;size=571;	LT980971	AATTCTCAACCTTCTCAGTTTTGGGAGGGCTTGGACTTTGGAGGTTTTTGCTGGCACCTCTCGGGAGCCGGCTCCTCTCAAATGAATTAGCAGGGTTCTTCAGCCGACCCCCTCGACGTGATAAGATTTTCTACGTCCGAGGTTTGGAACGGAGACCTGCTTCTAATCGTCTCTCTATGAGATGTTATTTGAACC	Fungi	Basidiomycota	Agaricomycetes	Russulales	Russulaceae	_	russula-lactarius	gb|GU258294.1	98.97	5.88e-50	86.08
OTU1005	332_746527|F|ITS2;size=3808;	LT978612	AAAACCACCTCACAGATAATGTGGTATTGGTAGAAGTGGGCAGTAATAACATTACATTGTTCTACTCTACTGAAATCAATAGGCCAGAAAAGTGAACCATGGTGACAGACTCTCAGAGTGTTTTAAAATGCTAAACTAGTCTTACCCAGGTTGGAATCTGAGCCACTGGACCCCCATTTAGTCCAAAACAGAGA	Fungi	Ascomycota	Pezizomycetes	Pezizales	Tuberaceae	Tuber	tuber-helvella	FJ803957	100	3e-83	95.36
OTU1006	333_777093|F|ITS2;size=97;	LT978931	ACACCTCAACTCTCACGGTTCGCCGTGACGAGCTTGGACTTTGGGGGACTTGCTGGCCTACGGTCGGCTCCCCTCAAATGGATCAGCTTTCCAGTGTTTGGCGGCGTCACAGGTGTGATAAATATCTACGCTTGTGGTTTTCCACCAGGTAACCTTCAGTGATGGGGGTTCGCTGGGGCTCATAAACGTGTCTCTCCTCGGTGAAGACAGCTTTGTGAAC	Fungi	Basidiomycota	Agaricomycetes	Thelephorales	Thelephoraceae	Tomentella	tomentella-thelephora	gb|JX630834.1	99.55	3.04e-82	92.69
OTU1007	334_804043|F|ITS2;size=917;	LT978932	ACACCTCAACTCTCGTGGTTTGCCATGATGAGCTTGGACTTTGGGGGTTTTGTTGGCCTGTTGGCCAGCTCCTCTTAAATGAATTAGCTTGCCAGTGTTTGGTGGCGTCACAGGTGTGATAACTATCTACGCTTGTGGTTTCCCACCAGATAACCTTCAGCAATGGAGGTTCGCTGGAGCTTATAAATGTCTCTCCTCAGCGAGGACACATTTTGACC	Fungi	Basidiomycota	Agaricomycetes	Thelephorales	Thelephoraceae	Tomentella	tomentella-thelephora	JX630406	100	2e-96	95.87
OTU1008	334_804419|F|ITS2;size=40924;	LT979913	AATCCTCAAAACCCTTTTTCTTGTTATCGGAATCGGGGTTTTGGACTTGGAGGCTCGATGCTCGCTTTTGCTTTCGAAAGCGAGCTCCTCTTAAATGAATTAGTGGGGTCCGCTTTGTCGATCCTTGACGTGATAAGATGTTTCTACGTTTTGGATTTGGCACCGTTTTCTCCGCTCCTAACCGTCCGTCCCATGGACAACGATGGTGCTTCGGTCCCTGCCGTCTACTTTGGCGGGAGGCTGGGCCCACAAAAACGA	Fungi	Basidiomycota	Agaricomycetes	Russulales	Russulaceae	Russula	russula-lactarius	AB509729	100	7e-131	99.22
OTU1009	334_809051|F|ITS2;size=6;	LT978933	ACACCTCAACTCTCATGGTTTACCATGATGGGCTTGGACTTTGGAGGTCTTGCTGGCCAGTGGGCCAGCTCCTCTCAAATGAATTGGCTTGCCAGTGTTTGGTGGCATCACGGGTGTGATAACTATCTACGCTTGTCGCTGTCTGCCAGGTAACCTTCAGCGATGGAGGTTCGCTGGAGCTCATAGACGTCTCTCCTCAGCGAGGACAGCTTTTGAAC	Fungi	Basidiomycota	Agaricomycetes	Thelephorales	Thelephoraceae	Tomentella	tomentella-thelephora	HE814198	100	3e-93	94.95
OTU1010	334_809481|F|ITS2;size=1903;	LT979914	AATTCTCAAAACCCTTTTCTTTTGATCGAGAAATGGATTTTGGACTTGGGGGATCAATGCTCACTCTCACTTGTCGAAGGTGGGCTCCTCTCAAATGAATTGGTGGGGTTCGCTTTGCTGATCCTTGACGTGATAAGATGATGTTTTATTTTTACGTTTTTGATTTGGCACCGTCCCTCCAACCGTCTTACGGACAATGATGGTGTTCTGGTCACCGCCGCCCATGTCGGTGGATGGCTGGACCCACAAGAAAA	Fungi	Basidiomycota	Agaricomycetes	Russulales	Russulaceae	Russula	russula-lactarius	gb|JQ991793.1	100	9.93e-112	96.06
OTU1011	334_814300|F|ITS2;size=77;	LT979915	AATCTTCAAAACCCTTTTGTGGGATTTTGGACTTGGAGGTCTAATGCTTGCCTTTGATTTCAAAAGCGAGCTCCTCTCAAATAAATTAGTGAGGTCTGCTTTGCTGGTCCTTGACGTGATAAGATGTTTCTACGTTTTGGATTTGGCACCGTCGCTCGCTTCTAACCGTCTCATGGACAACCGATGGCGCTCCGGTCACCGCCATCAACGTTGGCGGGAGGCTTGGCCCACGAAAGAAAAA	Fungi	Basidiomycota	Agaricomycetes	Russulales	Russulaceae	Russula	russula-lactarius	GQ344559	100	3e-124	100
OTU1012	334_814539|F|ITS2;size=4328;	LT980269	AATTCTCAACCTCCCCAATTTCTTGGGGGTAAGGCTTGGACTTTGGAGGCATTATGCTGGTTTCCCTTTTGAAGCCAGCTCCTCTTAAACGAATTAGTGGGGTCCCTCTTTGCCGGTCCCTCGACGTGATAAGATTTCTCTACGTCCGAGGTTTGGCTCTTTGTAGGCCCGCTTCTAACCGTCTCTTTCTCGAGACACGTTTGAACC	Fungi	Basidiomycota	Agaricomycetes	Russulales	Russulaceae	Lactarius	russula-lactarius	gb|JN388955.1	100	8.64e-68	90.34
OTU1013	335_815747|F|ITS2;size=491;	LT980972	AATCCTCAAAACCCTTTTTCTCTTTGAAAAGGATTTTGGACTTTGGAGGTTTGATGCTTGCCTTTTGCTTTCAAAAGCGAGCTCCTCTCAAATGAATTAGTGGGGTTTGCTTTGCCGATCCTTGACGTGATAAGATGCTTCTACGTTTTTGGATTTGGCACTGATGCCTGCTTCTAACCGTCCGTCTCACGGACGCTGATGGTGCTCTGGTCATCGCCAATCTACATTGGCGGGAGGCTGGACCCACAATAAAAAGGA	Fungi	Basidiomycota	Agaricomycetes	Russulales	Russulaceae	_	russula-lactarius	GQ166871	99	3e-79	88.24
OTU1014	335_815878|F|ITS2;size=8;	LT980973	AATCCTCAAAACCCTTTTCTCTTTGAAAGGATTTTGGACTTTGGAGGTTTGATGCTCGCCTTTTGCTTTCAAAAGCGAGCTCCTCTCAAATGAATTAGTGGGGTTTGCTTTGCCGATCCTTGACGTGATAAGATGCTTCTACGTTTTTGGATTTGGCACCGATGCCCGCTTCTAACCGTCCGTCTCACGGACGTTGATGGTGCTCTGGTCATCGCCAATCTACATTGGCGGGGGAGGCTGGACCCACAATAAAAAGGA	Fungi	Basidiomycota	Agaricomycetes	Russulales	Russulaceae	_	russula-lactarius	JX030251	99	7e-76	87.55
OTU1015	335_816989|F|ITS2;size=42;	LT980974	AATCCTCAAAACCCTTTTTCTCTTTGAAAAGGATTTTGGACTTTGGAGGTTTGATGCTTGCCTTTTGCTTTCAAAAGCGAGCTCCTCTCAAATGAATTAGTGGGGTTTGCTTTGCCGATCCTTGACGTGATAAGATGCTTCTACGTTTTTGGATTTGGCATCGATGCCCGCTTCTAACCGTCCGTCTCACGGACGCTGATGGTGCTCTGGTCATCGCCAATCTACGTTGGCGGGGGAGGCTGGACCCACGAAATGAAA	Fungi	Basidiomycota	Agaricomycetes	Russulales	Russulaceae	_	russula-lactarius	GQ166871	98	3e-74	87.35
OTU1016	335_818241|F|ITS2;size=6;	LT979916	AATCCTCAAAACCCTTTTTCTCTTTGAAAGGGTTTTGGACTTGGAGGATCGATGCTTGCCCTCACTTTGAAGGCGAGCTCCTCTCAAATAAATTAGTGGGGTTTGCTTTGCTGATCCTTGACGGTGATAAGACATCTCTACGTTTTGGATTTGGCGACTGTCCCTTGCTTCTAACCGTCCTATGGACAATGATGGGTGCACCGGTCCACCGCCTTACATTGGTGGGGGGCTGGACCCACAATAAAAAGGA	Fungi	Basidiomycota	Agaricomycetes	Russulales	Russulaceae	Russula	russula-lactarius	emb|LN912071.1	100	1.28e-115	97.23
OTU1017	335_819709|F|ITS2;size=8;	LT980975	AATCCTCAAAACCCGTTCTTCAATTGGGAAAAGGATTTTGGACTTTGGAGGTTTGATGCTTGCCTTTTGCTTTCAAAAGCGAGCTCCTCTCAAATGAATTAGTGGGGTTTGCTTTGCCGATCCTTGACGTGATAAGATGCTTCTACGTTTTTGGATTTGGCACTGATGCCTGCTTCTAACCGTCCGTCTCACGGACGCTGATGGTGCTCTGGTCATCGCCAATCTACATTGGCGGGAGGCTGGACCCACGAAACGAAA	Fungi	Basidiomycota	Agaricomycetes	Russulales	Russulaceae	_	russula-lactarius	GQ166871	98	3e-74	87.35
OTU1018	335_829121|F|ITS2;size=308;	LT979917	AATTCTCGAACCTTCTTGGTTTCTTGACCAAGATGGCTTTGGACTTTGGAGGTTTTTTGCTGGCTTTGCAGAAAGTCGGCTCCTCTTAAATGCATTAGTGGGGTCCCCTTTGCCAATCCCCGGGCGTGATAAGATGTTTTCTACGTCTTGGGATTTGCTCTGTTCATTGGGAACCTGCTTCCAACCGTCTCGTGAGAGACATCGTTCGAGCTTGCTCGGCACACGAA	Fungi	Basidiomycota	Agaricomycetes	Russulales	Russulaceae	Russula	russula-lactarius	gb|KT275671.1	100	6.02e-104	97.36
OTU1019	335_833220|F|ITS2;size=300;	LT979918	AATCCTCAAAACCTGTTCTTCGATTGGGGAAAGGGTTTTGGACTTGGAGGATCAATGCTTGCCCTCACTTTGAAGGCGAGCTCCTCTCAAATAAATTAGTGGGGTTTGCTTTGCTGATCCTTGACGGTGATAAGACATCTCTACGTTTTGGATTTGGCAACTGTCCCTTGCTTCTAACCGTCCTATATGGACAATGATGGGTGCACCGGTCCACCTCCTTACATTGGAGGGGGGCTGGACCCACAAAAAAGGA	Fungi	Basidiomycota	Agaricomycetes	Russulales	Russulaceae	Russula	russula-lactarius	JX425385	100	6e-131	100
OTU1020	335_833698|F|ITS2;size=3079;	LT981238	AAATTATCAACCAATCTCTTGATTCATTTCAAGTTATCGGCTTGGACTTGGGAGTTGCTGGTGTCCCCCCTATCAGCTCTTCTGAAATACATTAGCAGTTGGGTGGCTAGTCTTTCGGACGTGCACGGCCTTCGACGTGATAATCATCGTCGTTCGCTGGAGCGACTTGGACAATGCCAATTACTCCCATCGCTTACAATACCATCAAGCTTTAGTTATTAGTCCATCGAAAGATCGGCGAACACAAAGCTACACAATATCTAC	Fungi	Basidiomycota	Agaricomycetes	Boletales	_	_	boletus	EU837225	62	5e-28	81.21
OTU1021	335_833828|F|ITS2;size=341;	LT980896	AACTATCAAAACACTTTTGCTTTTGTCGAAGTGTCTTGGACTTTGGGAGTGCTGGTCTCTTTTTGAGCCGGCTCTCCTCAAAAGCATTGCTTTGGAGACCATCAGCGTGATAATTTTATGTTTATGCCGCTGGCTTCTCCTTCTGTCCC	Fungi	Basidiomycota	Agaricomycetes	Agaricales	Amanitaceae	Amanita	amanita	AB509788	100	5e-70	98.66
OTU1022	336_837577|F|ITS2;size=13036;	LT980729	AATTTTCTCAAGCTTGGATGGGCTTTTTTGTCTGTCCATAGCCTTGGTTGTTGGGCTTTGCCGTGTCCTTTATTGGGTACGGCTGGCCTTAAAAGCATTAGCCGATCCTCATGTGGCACTGGTTCTACTCAGCGTGATAATAGTCTGACCGCTGAGGACATCTTTTGGGATGGCCAGTTCTCATTTGGGTTGCTTCTAAACTTGGTATTACAGATTGTTCAATCTGTGTTCCGCATTTCAG	Fungi	Basidiomycota	Agaricomycetes	Cantharellales	Clavulinaceae	Clavulina	clavulina	gb|KM588766.1	98.76	3.85e-96	94.12
OTU1023	336_855819|F|ITS2;size=4231;	LT980730	AATTTCTCAAGCTTGGATGGCAATTTTTTGTCTTTCCTTAGTTTGGTTGTTGGGCTTTGCCGTGTCCCTTCATTGGGACGGCTGGCCTTAAAAGCATTAGCTGATCCTCGTGTGGAACTGGTTCTACTCAGCGTGATAACAGTCTGATCGCTGAGGACATCCTTCGGGATGGCCAGTCCCCCATTTGGATTGCTTCTAAACCCTGGTTGGTTGTATTCCAACTTTTTCAG	Fungi	Basidiomycota	Agaricomycetes	Cantharellales	Clavulinaceae	Clavulina	clavulina	gb|GQ900528.1	100	4.91e-105	97.41
OTU1024	337_863784|F|ITS2;size=163;	LT980831	AATTCTCAACCATGAGTCTTGACTCGTGGCTTGGAGTTGGGGGTTTGCTGGCGGCGAAAAGCTGTCAGCTCTCCTGAAATGCATTAGCAAAGGGGTGGCAAGTCTAAGTCTGACGTGCACGGCCTTCGACGTGATAATGATCGTCGTGGCTGGAGCGTCGAGACGTGCAGGAATCGTCCTTGCTTCCAATCCTACATATATCCTATGACTACTAGTCGTTGGGTCTATTTCGAA	Fungi	Basidiomycota	Agaricomycetes	Boletales	Boletaceae	Boletus	boletus	gb|JQ991666.1	92.31	1.4e-90	95.83
OTU1025	337_866688|F|ITS2;size=11695;	LT980372	CAAGTTCTCAACCACATCAATTTCAATGTGGCTTGGATGGTGGGGGTTCTTTTTGCAGGCTTCTGTAAATATGAAGTCGGCTCCCCTGAAATGTATTAGTGGTATCTGAGCTACTACAGGTGTGATAACTATCTATGCCTTGGTATGCTGCATGAAACAGATTGCGCCGCTTCTAACAAGTGGGAAACACAATTTTGATGA	Fungi	Basidiomycota	Agaricomycetes	Agaricales	Inocybaceae	Inocybe	inocybe	JX129146	100	4e-102	100
OTU1026	337_870368|F|ITS2;size=13542;	LT978613	AAACCCAGATCACCTAGAGTGTGGTATTGGCAGAAGTGGCCGGGGCTATCAGCGCTGCTGCCACTCTGCTGGAATGAATAGGCTGGAAAAGTAGATCATAGCAACAGACTTTCACAGTATTTTGAAATGCTAAATTAGTTTGAAGCTGATCAGAACCCAAGCCATTTGACCCCCATCCTGCGTAAAGCAGTAA	Fungi	Ascomycota	Pezizomycetes	Pezizales	Tuberaceae	Tuber	tuber-helvella	gb|KP311464.1	100	1e-91	98.96
OTU1027	337_872353|F|ITS2;size=3;	LT981032	AATTCTCAACCGTCTCTTGATTTATTTCGAGGGAATGGCTTGGATTTTGGGAGTTGCCGGTGACCCACTAGGGTAGGTCGGCTCTCCTTAAAAGCATTAGCGGAAGGTGACAAGCCAGATGCATGAACGGCCTTCGACGTGATAATGATCGTCGTGGCTGGAGTGCTCAGGCATGGATCGTCTTTGCTTCTAATCGAATCACGACTTGGGTGGACTTTTTGCTTCTGGCGAAGGGAAAGCTCTGGTCGCGCTCTCTTTTGAA	Fungi	Basidiomycota	Agaricomycetes	Boletales	Melanogastraceae	_	paxillus-gyrodon	KM576463	89	1e-58	85.36
OTU1028	337_875252|F|ITS2;size=38;	LT981161	AACTATCAAAATGCCCCTTTTTGGGGGATGTTTTGGACTTTGGGATTGCTGCTCTGCTTGAGCCAGCTCTCCTCAAAAGCATTTAGCTTTGGAGACCATCAGTGTGATAACTCTGTTTTCACTGATTGAGTTGTGTCTCTGCTTTTG	Fungi	Basidiomycota	Agaricomycetes	Agaricales	Amanitaceae	_	amanita	UDB014201	100	1e-40	87.58
OTU1029	337_876209|F|ITS2;size=32;	LT980139	AATTCTCAACTCCAATTGTTTCGACTCTGGAGATTGGACTTTGGAGTGTGCTGGCGTCGGTCGGCTCCTCTCAAATGCATCAGCGGAATCTAACGTTTCGGACGTCAGTGTGATAATCATGTTGCGCTGTCCTCTGATCTGAAAGGCCCGCTCACAATGGTCTCCGGACAACTTCACATCAA	Fungi	Basidiomycota	Agaricomycetes	Atheliales	Atheliaceae	Piloderma	piloderma	emb|LN910119.1	100	6.49e-89	100
OTU1030	338_884163|F|ITS2;size=6;	LT979919	AATTCTCAAAACCTTTTCTTGGGGTTTTGGACTTGGAGGTTCAATGCTCACTTTCGAGACCCGAAAGTGAGCTCCTCTCAAATGAATTAGTGGGGTCTGCTTTGCTGGTCCTTGACGTGATAAGATGTTTCGACGTTTTGGACTTGGCACCGTCTCTTGGATGCCTGCTTCTAACCGTCCGTCTCGTGGACAATGATGGTGCTCTGGTCTCCTCCATCCACAATGGTGGGAGGCTGGACCCACAAATAAAAA	Fungi	Basidiomycota	Agaricomycetes	Russulales	Russulaceae	Russula	russula-lactarius	AB218160	100	6e-116	96.46
OTU1031	338_896071|F|ITS2;size=10538;	LT980159	CCCACCCCACTCAAATATCTCTTTTATCAGATGTTTGGAATACTTTGGAGAAGTGTTTTGTTATAGAAACACCCTCCAGAAATTGATTGGCAGTATGGTTTGCACTTGAACCAGACGTAATAATAATAAAATCGTTTGTTTAGGTATAATTGTGCTTGTCTCAACCCACCCATTTTTATTTTATTTTAAATTTTT	Fungi	Ascomycota	Pezizomycetes	Pezizales	Pezizaceae	Peziza	terfezia-peziza	gb|KU061018.1	100	4.18e-96	100
OTU1032	338_898603|F|ITS2;size=52;	LT981066	CAACCCTCAAGCCTAGCTTGGTCTTGGGAATCGCGGTCCCCGCGGCCCCTAAAATCAGTGGCGGTGCCTGTAGGCTCTACGCGTAGTAATTTTTCTCGCGATGGATCCCTATACGTGCTCGCCAACAACCCCCAATTCTTTCA	Fungi	Ascomycota	Leotiomycetes	Helotiales	Helotiaceae	_	helotiales6	HM190116	100	5e-70	100
OTU1033	338_904252|F|ITS2;size=432;	LT979920	AATCCTCAAAACCCCTTTTCTTTCATCGGAATCGGGATTTTGGACTTGGAGGTTCAATGCTCGCTTTCGCTCAAGAAAGCGAGCTCCTCTTAAATGGATTAGTGGGGTCCGCTTTGTCGATCCTTGACGTGATAAGATGTTTCTACGTTTTGGACTTGGCACTGTTTTCTTCGCTTCTAACCGTCCCATGGACAACGATGGTGCTCCGGTCCTCGTCATCTACTTGGCGGGAGGCTGGACCCACAAAACAAA	Fungi	Basidiomycota	Agaricomycetes	Russulales	Russulaceae	Russula	russula-lactarius	emb|LN911849.1	100	3.55e-116	97.22
OTU1034	339_904299|F|ITS2;size=476;	LT980211	AGTTCTCAACCTTCTTCATTTTTTGATGAAAAGGCTTGGACTTTGGAGGCTTTTGCCGGCCTCTCTTCATCGAGGTCGGCTCCTCTTAAATGCATTAGTAGGATCCCTTCTTGCTGGTCCTCGACGTGATAAGACTTTTCTACGTCTGGAACTTAGCTATGAGGCCTGCTTCTAATCGTCTCTTTTGAGACAAGCCGGTCAGACCCCCCTCTGACCCGTGAACCC	Fungi	Basidiomycota	Agaricomycetes	Russulales	Russulaceae	Lactifluus	russula-lactarius	HQ318221	100	3e-113	99.56
OTU1035	339_904331|F|ITS2;size=1814;	LT981254	GAAACCTCTCAACCGCTCCAAATTTATATGGTGCGGCTTGGAAATGGGGGCTGCAGGCTGAGTGAGGTCTGCTCTCCTGAAAAGCATTAGCGGTGTCTGGGCAGACTGCCACAGGTGTGATAACCAATCGACGCCTTGGTGTGTGCTGTGGATTGCTGCCGCTTCCAACGTCTCTGAATATATGACCA	Fungi	Basidiomycota	Agaricomycetes	Agaricales	_	_	inocybe	KP636857	89.36	7e-35	81
OTU1036	339_904438|F|ITS2;size=138;	LT980592	ATATATATCAATCTCATTAGCTTCTGCTTGTTGAGTTTGGAAGTGGGGGTGTTTTGTTGCTGGCTTCTTTTCTGGAGGTCAGCTCCCCTGAAATTCATTAGCGGAACAACTTGTTGACCGTTCATTGGTGTGATAACTATCTACGCTATTGACGTGAAGCATGTTCAGCTTCTAACCGTCCATTGACTTGGACAAATTTTCATTA	Fungi	Basidiomycota	Agaricomycetes	Agaricales	Cortinariaceae	Cortinarius	cortinarius	UDB002732	99	5e-76	92.12
OTU1037	339_908076|F|ITS2;size=37;	LT978934	ACACCTCAACTCTCATGGTTTGCCATGATGAGCTTGGACTTTGGGGGTCTTGCTGGCCTGTGGTTGGCTCCTCTCAAATGAATCAGCTTTCCAGTGTTTGGTGGCATCACAGGTGTGATAACTATCTACGCTTGTGGTTTTCCACCAGGTAACCTTCAGCAATGGGGGTTCGCTGGGGCTCATAAACGTCTCTCCTCAGTGAAGACAGCTTTGTGAAT	Fungi	Basidiomycota	Agaricomycetes	Thelephorales	Thelephoraceae	Tomentella	tomentella-thelephora	gb|GQ985419.1	100	2.82e-97	96.79
OTU1038	339_911406|F|ITS2;size=6;	LT978935	ACACCTCAACTCTCATGGTTTGCCGTGATGAGCTTGGACTTTGGGGGTCTTGCCGGCATGACCGTCGGCTCCTCTCAAATGAATCAGCTTGCCAGTGTTTGGTGGCGTCACGGGTGTGATAACTATCTACCCTTGAGACTGCCTGCCAGGTAACCTTCAGTGATGGAGGTTCGCTGGGGCTCATAGACGTCTCTCCTCAGCGAGGACAGCTTTTTGAAC	Fungi	Basidiomycota	Agaricomycetes	Thelephorales	Thelephoraceae	Tomentella	tomentella-thelephora	emb|LN911874.1	100	8.46e-83	92.73
OTU1039	339_917635|F|ITS2;size=2;	LT981178	CAACCCTCAGGCCCCTAGCTGGTCTGGCGTTGGGGCATCTGCGGCCCGCAGGCCCTGAAAGACAGTGGCGGTACCCACTAGCACCCCGGGCGCAGTAGATGTATTTCTCGCCTAGGATGTCTAGCGGGTTGGCCGGCCATAAAACTCCCTAATCTTCGGAA	Fungi	Ascomycota	Sordariomycetes	Sordariales	_	_	sordariales1	LN910597	100	2e-73	98
OTU1040	339_918682|F|ITS2;size=28;	LT978936	ACACCTCAACTCCCATGGTTCGCCATGGTGAGCTTGGACTTTGGGGGTTTTGCTGGCCCATGGTCAGCTCCTCTCAAATGAATTAGCCTGCCAGTGTTTGGTGGCATCACAGGTGTGATAAATATCTACGCTTGTGGTTTTCTGCCAGGTAACCTTTGGCAACAGAGGTTCATTGGAGCTCATAAACGTCTCTCCTCAGTGAGGACAGCTCTTTGAAT	Fungi	Basidiomycota	Agaricomycetes	Thelephorales	Thelephoraceae	Tomentella	tomentella-thelephora	emb|LN912363.1	100	2.37e-78	91.74
OTU1041	34_784720|F|ITS2;size=15;	LT978937	ACACCTCAACTCTCATGGTTTGCCATGATGAGCTTGGACTTTGGGGGTCTTGCTGGCCTGCAGTCAGCTCCTCTCAAATGAATCAGCTTTCCAGTGTTTGGTGGCATCACAGGTGTGATAACTATCTACGCTTGTGGTTTTCTGCCAGGTAACCTTCAGCAATGGGGGTTCGCTGGGGCTCATAAATGTCTCTCCTCAGTGGAGACAGCTCTTTGGAC	Fungi	Basidiomycota	Agaricomycetes	Thelephorales	Thelephoraceae	Tomentella	tomentella-thelephora	HE814073	96	2e-105	99.52
OTU1042	34_801112|F|ITS2;size=7;	LT978938	ACACCTCAACTCTTCATGGTTTTCCGTGATGAGCTTGGACTTTGGGGGTCTTGCTGGCCTACGGTCGGCTCCTCTAAAATGAATCAGCTTGCCAGTGTTTGGTGGCACACAGGTGTGATAACTATCTACGCTTGTGGTTTTCCACCGGTAACCTTCAGCAGTGGAGGTTCGCTGGAGCTCATAAATGTCTCTCCTCAGTGTGAGACAGCATTTTGAAC	Fungi	Basidiomycota	Agaricomycetes	Thelephorales	Thelephoraceae	Tomentella	tomentella-thelephora	gb|KM409415.1	99.54	1.4e-90	95.02
OTU1043	34_801245|F|ITS2;size=742;	LT979921	ACATCCTTCAACCTTTCTTGGTTTCTCGATCGAGAAAGGCTTGGACTTTGGGGATTGCTGGCCTAGCCAGCTCCTCCTAAATGGATTAGTGGGGTCCGCTTTGCCGATCCTTGACGTGATAAGATGTTTCTACGTCTTGGGTTTTGCACTGTTGCTTTGGGCCCTGCTTCTAATCGTCTTGCATTCAGGACAGAGTCATGAA	Fungi	Basidiomycota	Agaricomycetes	Russulales	Russulaceae	Russula	russula-lactarius	GQ268649	100	7e-70	89.86
OTU1044	34_802084|F|ITS2;size=1741;	LT978939	ACACCTCAACTCTTCATGGTTTTCCGTGATGAGCTTGGACTTTGGGGGTTTGCTGGCCTATGGTCGGCTCCTCTAAAATGAATCAGCTTTCCAGTGTTTGGTGGGCGTCACAGGTGTGATAACTATCTACGCTTGTGGTTTTCCCACCAGGTAACCTTCAGCAGTGGAGGTTCGCTGGAGCTCACAGATGTCTCTCCTCAGTGAAGACAACCCTTTGAAT	Fungi	Basidiomycota	Agaricomycetes	Thelephorales	Thelephoraceae	Tomentella	tomentella-thelephora	emb|FN565374.1	100	9.9e-102	97.74
OTU1045	34_802141|F|ITS2;size=164;	LT979571	GTACTCTCACACTCCTCATCCTTTGGTGGATTTGGAGCGGTGGCCTTGGGTGTTGCTGCCTTGCTGCGGCTCACCTGAAATGCATGAGTGCAACTCTTGGTTGGACATAGTACGGCGTGATAAGTGTCTTCGCCGGCACCTCGCAAGAGGGTGGCCGACTGGGAGCTCTGTGCTTCCAACTGTCCTTGGACAATGACTGACG	Fungi	Basidiomycota	Agaricomycetes	Sebacinales	Sebacinaceae	Sebacina	sebacina	GQ268665	99	5e-76	92.16
OTU1046	34_802528|F|ITS2;size=468;	LT978940	ACACCTCAACTCTCATGGTTCGCCATGATGAGCTTGGACTTTGGAGGCTTTGCCGGCCTGCGGTCGGCTCCTCTCAAATGGATCAGCTTACCGGTGTATTGGTGGCGTCGCAGGTGTGATAACTATCTACGCTTGCGTTCGTCTGCCAGACAACCTCTGGCACTGTCGGAGGTTTGCCGGAGGCTCATAAATGTCTCCCGAGCGAAGACAGCTTTCTGAAC	Fungi	Basidiomycota	Agaricomycetes	Thelephorales	Thelephoraceae	Tomentella	tomentella-thelephora	UDB014179	100	3e-89	93.67
[truncated: 1,660 more rows]
